# Supplementary material for: Signalling networks constructed by integrative analysis of multi-omics in peripheral blood mononuclear cells in systemic lupus erythematous patients
Source: Research Square preprint supplement (doi:10.21203/rs.3.rs-60254/v1), 2021-04-21
Supplement: Supplementary file 1 [file 5628a4ffc699de0d05ddaec3.xlsx]

## Sheet: Sheet1
Methylation_Gene_Information													mRNA_Information						GO		KEGG
#GeneSymbol	FC(SL_C/H_C)	Sig_FC	Regulation	pvalue	Sig_pvalue	chr	strand	start	end	Gene_Info1	Gene_Info2	Gene_Info3	#mRNA	FC(SL_C/H_C)	Sig_FC	Regulation	p_value	Sig_p_value	GO_list	GO_term	KEGG_list	KEGG_term	KEGG_class	Gene symbol
ENSG00000144843	2.46094	yes	up	0.000134262	yes	chr3	+	119581001	119582000	promoter	Proximal	LCP	ENST00000357003	13.5849	yes	up	2.94551e-07	yes	GO:0051725;GO:0000287;GO:0003875;GO:0005622;GO:0030955;GO:0016787;GO:0005515;GO:0006464	protein de-ADP-ribosylation;magnesium ion binding;ADP-ribosylarginine hydrolase activity;intracellular;potassium ion binding;hydrolase activity;protein binding;cellular protein modification process	.	.	.	ADPRH
ENSG00000166432	0.555785	yes	down	0.000587833	yes	chrX	-	101898001	101899000	exon	internal exon	NA	ENST00000494068	0.103327	yes	down	9.97136e-06	yes	GO:0072332;GO:0003723;GO:0003677;GO:0046872;GO:0005634;GO:0002039;GO:0008270;GO:0003676	intrinsic apoptotic signaling pathway by p53 class mediator;RNA binding;DNA binding;metal ion binding;nucleus;p53 binding;zinc ion binding;nucleic acid binding	.	.	.	ZMAT1
ENSG00000157870	2.49275	yes	up	0.000177975	yes	chr1	+	2584001	2585000	promoter	Distal	ICP	ENST00000419916	7.2275	yes	up	5.64639e-05	yes	GO:0070062;GO:0016616;GO:0005783;GO:0043209;GO:0047017;GO:0055114;GO:0005737;GO:0016209;GO:0006693;GO:0005829;GO:0006631;GO:0006633;GO:0001516;GO:0016491;GO:0006629	extracellular vesicular exosome;oxidoreductase activity, acting on the CH-OH group of donors, NAD or NADP as acceptor;endoplasmic reticulum;myelin sheath;prostaglandin-F synthase activity;oxidation-reduction process;cytoplasm;antioxidant activity;prostaglandin metabolic process;cytosol;fatty acid metabolic process;fatty acid biosynthetic process;prostaglandin biosynthetic process;oxidoreductase a…	ko00590	Arachidonic acid metabolism	Metabolism	FAM213B
ENSG00000180263	1.41011	yes	up	0.000256427	yes	chr12	-	95141501	95142500	intron	internal intron	NA	ENST00000546711	0.15029	yes	down	0.000166125	yes	GO:0031267;GO:0046847;GO:0005085;GO:0043547;GO:0005737;GO:0005856;GO:0030036;GO:0030027;GO:0008360;GO:0001726;GO:0046872;GO:0043087;GO:0005794;GO:0007010;GO:0035023;GO:0005089	small GTPase binding;filopodium assembly;guanyl-nucleotide exchange factor activity;positive regulation of GTPase activity;cytoplasm;cytoskeleton;actin cytoskeleton organization;lamellipodium;regulation of cell shape;ruffle;metal ion binding;regulation of GTPase activity;Golgi apparatus;cytoskeleton organization;regulation of Rho protein signal transduction;Rho guanyl-nucleotide exchange factor a…	.	.	.	FGD6
ENSG00000107890	0.336552	yes	down	0.000246988	yes	chr10	-	27099501	27100500	exon	first exon	NA	ENST00000376087	0.162563	yes	down	0.00028196	yes	GO:0005813	centrosome	.	.	.	ANKRD26
ENSG00000070371	1.53457	yes	up	0.00071174	yes	chr22	-	19201001	19202000	intron	first intron	NA	ENST00000621271	5.19384	yes	up	0.000467531	yes	GO:0016020;GO:0000278;GO:0005770;GO:0030130;GO:0031410;GO:0016192;GO:0046326;GO:0097443;GO:0005515;GO:0005829;GO:0048268;GO:0030135;GO:0005819;GO:0004871;GO:0032051;GO:0030659;GO:0070062;GO:0009653;GO:0007165;GO:0030136;GO:0005622;GO:0042147;GO:0005802;GO:0061024;GO:0006886;GO:0030132;GO:0006898;GO:0005905;GO:0005198;GO:0071439	membrane;mitotic cell cycle;late endosome;clathrin coat of trans-Golgi network vesicle;cytoplasmic vesicle;vesicle-mediated transport;positive regulation of glucose import;sorting endosome;protein binding;cytosol;clathrin coat assembly;coated vesicle;spindle;signal transducer activity;clathrin light chain binding;cytoplasmic vesicle membrane;extracellular vesicular exosome;anatomical structure mo…	ko05016;ko04961;ko04144;ko04142;ko05100;ko04721	Huntington's disease;Endocrine and other factor-regulated calcium reabsorption;Endocytosis;Lysosome;Bacterial invasion of epithelial cells;Synaptic vesicle cycle	Human Diseases;Organismal Systems;Cellular Processes;Cellular Processes;Human Diseases;Organismal Systems	CLTCL1
ENSG00000143344	1.43039	yes	up	0.000371759	yes	chr1	+	183916501	183917500	intron	internal intron	NA	ENST00000360851	5.10577	yes	up	0.000503618	yes	GO:0007165;GO:0005829;GO:0008321;GO:0007264;GO:0019216;GO:0005085;GO:0043547	signal transduction;cytosol;Ral guanyl-nucleotide exchange factor activity;small GTPase mediated signal transduction;regulation of lipid metabolic process;guanyl-nucleotide exchange factor activity;positive regulation of GTPase activity	ko04014	Ras signaling pathway	Environmental Information Processing	RGL1
ENSG00000115594	0.340757	yes	down	2.80618e-07	yes	chr2	+	102104001	102105000	intron	first intron	NA	ENST00000410023	5.17915	yes	up	0.000510774	yes	GO:0016020;GO:0004909;GO:2000661;GO:0007166;GO:0070498;GO:0019966;GO:0005887;GO:0005515;GO:0070555;GO:0004888;GO:0005576;GO:0016021;GO:0004871;GO:0005886;GO:0002020;GO:0043231;GO:0005161;GO:0007165;GO:0004908;GO:2000391;GO:0050727;GO:0009986;GO:0006955;GO:0019221	membrane;interleukin-1, Type I, activating receptor activity;positive regulation of interleukin-1-mediated signaling pathway;cell surface receptor signaling pathway;interleukin-1-mediated signaling pathway;interleukin-1 binding;integral component of plasma membrane;protein binding;response to interleukin-1;transmembrane signaling receptor activity;extracellular region;integral component of membra…	ko05146;ko04380;ko04060;ko04064;ko04010;ko04659;ko04640;ko04750;ko05418;ko05166	Amoebiasis;Osteoclast differentiation;Cytokine-cytokine receptor interaction;NF-kappa B signaling pathway;MAPK signaling pathway;Th17 cell differentiation;Hematopoietic cell lineage;Inflammatory mediator regulation of TRP channels;Fluid shear stress and atherosclerosis;HTLV-I infection	Human Diseases;Organismal Systems;Environmental Information Processing;Environmental Information Processing;Environmental Information Processing;Organismal Systems;Organismal Systems;Organismal Systems;Human Diseases;Human Diseases	IL1R1
ENSG00000154734	0.645244	yes	down	0.000605642	yes	chr21	-	26847001	26848000	promoter	Distal	ICP	ENST00000284984	0.174638	yes	down	0.000578722	yes	GO:0016020;GO:0001822;GO:0004222;GO:0008233;GO:0031410;GO:0008237;GO:0016787;GO:0005829;GO:0016021;GO:0007229;GO:0008201;GO:0008270;GO:0005576;GO:0005604;GO:0008285;GO:0005578;GO:0046872;GO:0006508;GO:0001542;GO:0060347	membrane;kidney development;metalloendopeptidase activity;peptidase activity;cytoplasmic vesicle;metallopeptidase activity;hydrolase activity;cytosol;integral component of membrane;integrin-mediated signaling pathway;heparin binding;zinc ion binding;extracellular region;basement membrane;negative regulation of cell proliferation;proteinaceous extracellular matrix;metal ion binding;proteolysis;ovu…	.	.	.	ADAMTS1
ENSG00000198039	1.78641	yes	up	0.000126473	yes	chr7	+	64896501	64897500	exon	internal exon	NA	ENST00000395375	0.179098	yes	down	0.000594846	yes	GO:0003677;GO:0046872;GO:0005634;GO:0005515;GO:0006355;GO:0005622;GO:0006351;GO:0003676	DNA binding;metal ion binding;nucleus;protein binding;regulation of transcription, DNA-templated;intracellular;transcription, DNA-templated;nucleic acid binding	.	.	.	ZNF273
ENSG00000180071	2.40848	yes	up	4.08644e-11	yes	chr9	-	38569501	38570500	downstream	NA	NA	ENST00000399703	4.98005	yes	up	0.000701446	yes	.	.	.	.	.	ANKRD18A
ENSG00000106477	0.663144	yes	down	0.000330744	yes	chr7	-	130396001	130397000	downstream	NA	NA	ENST00000223208	4.83455	yes	up	0.000887177	yes	GO:0005929;GO:0016020;GO:0042995;GO:0005737;GO:0036064;GO:0060271;GO:0005515;GO:0005829;GO:0015031;GO:0006810;GO:0005856;GO:0005815;GO:0018095;GO:0005813;GO:0030030;GO:0005814;GO:0010389;GO:0000086	cilium;membrane;cell projection;cytoplasm;ciliary basal body;cilium morphogenesis;protein binding;cytosol;protein transport;transport;cytoskeleton;microtubule organizing center;protein polyglutamylation;centrosome;cell projection organization;centriole;regulation of G2/M transition of mitotic cell cycle;G2/M transition of mitotic cell cycle	.	.	.	CEP41
ENSG00000157617	0.418994	yes	down	0.00070751	yes	chr21	-	41926001	41927000	exon	first exon	NA	ENST00000329623	0.186775	yes	down	0.000898775	yes	GO:0016020;GO:0005634;GO:0005829;GO:0016021	membrane;nucleus;cytosol;integral component of membrane	.	.	.	C2CD2
ENSG00000141956	0.75569	yes	down	0.000133714	yes	chr21	-	41821501	41822500	intron	internal intron	NA	ENST00000422911	0.192859	yes	down	0.000996274	yes	GO:0003677;GO:0005634;GO:0005654;GO:0006355;GO:0008168;GO:0006351;GO:0003676;GO:0046872;GO:0016604;GO:0016740;GO:0032259	DNA binding;nucleus;nucleoplasm;regulation of transcription, DNA-templated;methyltransferase activity;transcription, DNA-templated;nucleic acid binding;metal ion binding;nuclear body;transferase activity;methylation	.	.	.	PRDM15
ENSG00000069020	1.38045	yes	up	0.000121938	yes	chr5	+	67162501	67163500	exon	last exon	NA	ENST00000403625	4.66477	yes	up	0.00101278	yes	GO:0000287;GO:0016310;GO:0005524;GO:0016301;GO:0005622;GO:0006468;GO:0035556;GO:0005737;GO:0046872;GO:0018105;GO:0004674;GO:0000166;GO:0004672;GO:0016740	magnesium ion binding;phosphorylation;ATP binding;kinase activity;intracellular;protein phosphorylation;intracellular signal transduction;cytoplasm;metal ion binding;peptidyl-serine phosphorylation;protein serine/threonine kinase activity;nucleotide binding;protein kinase activity;transferase activity	.	.	.	MAST4
ENSG00000162383	0.653137	yes	down	0.000214214	yes	chr1	-	53092001	53093000	intron	internal intron	NA	ENST00000488036	0.19871	yes	down	0.00141538	yes	GO:0005313;GO:0016020;GO:0006810;GO:0089711;GO:0055085;GO:0006811;GO:0015293;GO:0006835;GO:0016021;GO:0003333;GO:0005314;GO:0005886;GO:0014047;GO:0015171	L-glutamate transmembrane transporter activity;membrane;transport;L-glutamate transmembrane transport;transmembrane transport;ion transport;symporter activity;dicarboxylic acid transport;integral component of membrane;amino acid transmembrane transport;high-affinity glutamate transmembrane transporter activity;plasma membrane;glutamate secretion;amino acid transmembrane transporter activity	ko04724	Glutamatergic synapse	Organismal Systems	SLC1A7
ENSG00000169247	0.184211	yes	down	0.000780027	yes	chr5	-	149025001	149026000	exon	last exon	NA	ENST00000515425	4.33745	yes	up	0.0014919	yes	GO:0032287;GO:0031410;GO:1901184;GO:0033157;GO:0022011;GO:0055037;GO:0005886	peripheral nervous system myelin maintenance;cytoplasmic vesicle;regulation of ERBB signaling pathway;regulation of intracellular protein transport;myelination in peripheral nervous system;recycling endosome;plasma membrane	.	.	.	SH3TC2
ENSG00000117461	2.62456	yes	up	7.46229e-07	yes	chr1	-	46058001	46059000	promoter	Distal	LCP	ENST00000262741	0.201023	yes	down	0.00160587	yes	GO:2001275;GO:0008286;GO:0043551;GO:0036092;GO:0006661;GO:0035014;GO:0046935;GO:0001784;GO:0016303;GO:0005515;GO:0005829;GO:0005942	positive regulation of glucose import in response to insulin stimulus;insulin receptor signaling pathway;regulation of phosphatidylinositol 3-kinase activity;phosphatidylinositol-3-phosphate biosynthetic process;phosphatidylinositol biosynthetic process;phosphatidylinositol 3-kinase regulator activity;1-phosphatidylinositol-3-kinase regulator activity;phosphotyrosine binding;1-phosphatidylinosito…	ko04611;ko05164;ko04072;ko04664;ko04810;ko05203;ko05218;ko04062;ko04932;ko05418;ko05213;ko04915;ko04670;ko04650;ko04722;ko04660;ko04668;ko04012;ko05210;ko04960;ko04930;ko04210;ko05211;ko05212;ko04024;ko05221;ko04919;ko04630;ko05161;ko04015;ko04218;ko04923;ko04666;ko04070;ko04933;ko05142;ko04973;ko05226;ko05160;ko05169;ko04150;ko04066;ko04914;ko05205;ko04211;ko04140;ko04370;ko05146;ko04620;ko05225…	Platelet activation;Influenza A;Phospholipase D signaling pathway;Fc epsilon RI signaling pathway;Regulation of actin cytoskeleton;Viral carcinogenesis;Melanoma;Chemokine signaling pathway;Non-alcoholic fatty liver disease (NAFLD);Fluid shear stress and atherosclerosis;Endometrial cancer;Estrogen signaling pathway;Leukocyte transendothelial migration;Natural killer cell mediated cytotoxicity;Neur…	Organismal Systems;Human Diseases;Environmental Information Processing;Organismal Systems;Cellular Processes;Human Diseases;Human Diseases;Organismal Systems;Human Diseases;Human Diseases;Human Diseases;Organismal Systems;Organismal Systems;Organismal Systems;Organismal Systems;Organismal Systems;Environmental Information Processing;Environmental Information Processing;Human Diseases;Organismal S…	PIK3R3
ENSG00000171365	2.21869	yes	up	2.147e-07	yes	chrX	+	49922001	49923000	intron	first intron	NA	ENST00000376091	4.24278	yes	up	0.00236074	yes	GO:0010008;GO:0016020;GO:0005524;GO:0034220;GO:0000139;GO:0005887;GO:0006821;GO:0000166;GO:0005829;GO:0005254;GO:0016021;GO:0015297;GO:0005886;GO:1902476;GO:0006810;GO:0005765;GO:0055085;GO:0007588;GO:0005247;GO:0006811;GO:0005768;GO:0005216;GO:0005794;GO:0045177	endosome membrane;membrane;ATP binding;ion transmembrane transport;Golgi membrane;integral component of plasma membrane;chloride transport;nucleotide binding;cytosol;chloride channel activity;integral component of membrane;antiporter activity;plasma membrane;chloride transmembrane transport;transport;lysosomal membrane;transmembrane transport;excretion;voltage-gated chloride channel activity;ion …	.	.	.	CLCN5
ENSG00000196159	0.311024	yes	down	0.000446869	yes	chr4	+	125318501	125319500	exon	first exon	NA	ENST00000394329	0.220759	yes	down	0.00243375	yes	GO:0016020;GO:0001822;GO:0035329;GO:0043931;GO:0003007;GO:0001658;GO:0022008;GO:0021987;GO:0005515;GO:0007009;GO:0016021;GO:0008543;GO:0005886;GO:0070062;GO:0072307;GO:0005622;GO:0048565;GO:0007157;GO:0060122;GO:0072137;GO:0007155;GO:0072006;GO:0007156;GO:0005509;GO:0045177;GO:0007219	membrane;kidney development;hippo signaling;ossification involved in bone maturation;heart morphogenesis;branching involved in ureteric bud morphogenesis;neurogenesis;cerebral cortex development;protein binding;plasma membrane organization;integral component of membrane;fibroblast growth factor receptor signaling pathway;plasma membrane;extracellular vesicular exosome;regulation of metanephric ne…	ko04392	Hippo signaling pathway - multiple species	Environmental Information Processing	FAT4
ENSG00000114346	0.560924	yes	down	0.000600286	yes	chr3	+	172774001	172775000	intron	internal intron	NA	ENST00000232458	4.09825	yes	up	0.00248087	yes	GO:0045859;GO:0045666;GO:0030054;GO:0051260;GO:0005085;GO:0005737;GO:0043065;GO:0005515;GO:0005911;GO:0051988;GO:0004871;GO:0015031;GO:0070301;GO:0072686;GO:0032467;GO:0005856;GO:0097149;GO:0030154;GO:0032147;GO:0000910;GO:0070830;GO:0032154;GO:0071479;GO:0051056;GO:0007399;GO:0017048;GO:0035556;GO:0043547;GO:0030496;GO:0071277;GO:0005829;GO:0005819;GO:0005923;GO:0006810;GO:0000902;GO:0005634;GO:…	regulation of protein kinase activity;positive regulation of neuron differentiation;cell junction;protein homooligomerization;guanyl-nucleotide exchange factor activity;cytoplasm;positive regulation of apoptotic process;protein binding;cell-cell junction;regulation of attachment of spindle microtubules to kinetochore;signal transducer activity;protein transport;cellular response to hydrogen perox…	.	.	.	ECT2
ENSG00000166147	1.78509	yes	up	0.000530221	yes	chr15	-	48515001	48516000	intron	internal intron	NA	ENST00000316623	4.0493	yes	up	0.00253742	yes	GO:0043687;GO:0005615;GO:0043010;GO:0033627;GO:0005179;GO:0071560;GO:0030023;GO:0044267;GO:0035582;GO:0005178;GO:0005515;GO:0001527;GO:0008201;GO:0005604;GO:0070062;GO:0007507;GO:0022617;GO:0048050;GO:0048048;GO:0030198;GO:0045671;GO:0005788;GO:0001822;GO:1990314;GO:0035583;GO:0090287;GO:2001205;GO:0005576;GO:0031012;GO:0001656;GO:0005201;GO:0005578;GO:0005509;GO:0001501;GO:0032403	post-translational protein modification;extracellular space;camera-type eye development;cell adhesion mediated by integrin;hormone activity;cellular response to transforming growth factor beta stimulus;extracellular matrix constituent conferring elasticity;cellular protein metabolic process;sequestering of BMP in extracellular matrix;integrin binding;protein binding;microfibril;heparin binding;ba…	.	.	.	FBN1
ENSG00000163900	0.152439	yes	down	0.000692124	yes	chr3	-	185498501	185499500	promoter	Intermediate	ICP	ENST00000421852	0.222308	yes	down	0.00255303	yes	GO:0016020;GO:0005515;GO:0016021	membrane;protein binding;integral component of membrane	.	.	.	TMEM41A
ENSG00000101298	2.15064	yes	up	0.000130527	yes	chr20	+	1294001	1295000	intron	internal intron	NA	ENST00000381873	4.00038	yes	up	0.0025723	yes	GO:0016020;GO:0005881;GO:0030054;GO:0007420;GO:0005737;GO:0043025;GO:0007269;GO:0042734;GO:0016021;GO:0005739;GO:0005886;GO:0045202;GO:0017075;GO:0030182;GO:0043005;GO:0016081;GO:0031966	membrane;cytoplasmic microtubule;cell junction;brain development;cytoplasm;neuronal cell body;neurotransmitter secretion;presynaptic membrane;integral component of membrane;mitochondrion;plasma membrane;synapse;syntaxin-1 binding;neuron differentiation;neuron projection;synaptic vesicle docking;mitochondrial membrane	.	.	.	SNPH
ENSG00000188322	0.679369	yes	down	7.28415e-06	yes	chr16	+	28322001	28323000	exon	last exon	NA	ENST00000341901	3.91627	yes	up	0.00301727	yes	GO:0016310;GO:0005524;GO:0016301;GO:0006468;GO:0005737;GO:0018107;GO:0018105;GO:0004674;GO:0000166;GO:0004672;GO:0016740	phosphorylation;ATP binding;kinase activity;protein phosphorylation;cytoplasm;peptidyl-threonine phosphorylation;peptidyl-serine phosphorylation;protein serine/threonine kinase activity;nucleotide binding;protein kinase activity;transferase activity	.	.	.	SBK1
ENSG00000141469	1.76031	yes	up	1.71288e-07	yes	chr18	+	45727001	45728000	intron	first intron	NA	ENST00000321925	3.87683	yes	up	0.00322184	yes	GO:0006833;GO:0016323;GO:0043231;GO:0016020;GO:0006810;GO:0055085;GO:0015265;GO:0015204;GO:0005730;GO:0005887;GO:0016021;GO:0005372;GO:0015840;GO:0071918;GO:0005886	water transport;basolateral plasma membrane;intracellular membrane-bounded organelle;membrane;transport;transmembrane transport;urea channel activity;urea transmembrane transporter activity;nucleolus;integral component of plasma membrane;integral component of membrane;water transmembrane transporter activity;urea transport;urea transmembrane transport;plasma membrane	.	.	.	SLC14A1
ENSG00000067141	1.66066	yes	up	5.38898e-07	yes	chr15	+	73127001	73128000	downstream	NA	NA	ENST00000560328	0.234959	yes	down	0.00346839	yes	GO:0007399;GO:0016020;GO:0005654;GO:0004872;GO:0030513;GO:0055072;GO:0007155;GO:0005887;GO:0005515;GO:0005794;GO:0016021;GO:0039706;GO:0007411;GO:0005886	nervous system development;membrane;nucleoplasm;receptor activity;positive regulation of BMP signaling pathway;iron ion homeostasis;cell adhesion;integral component of plasma membrane;protein binding;Golgi apparatus;integral component of membrane;co-receptor binding;axon guidance;plasma membrane	ko04514	Cell adhesion molecules (CAMs)	Environmental Information Processing	NEO1
ENSG00000127586	0.600256	yes	down	3.47695e-05	yes	chr16	+	797501	798500	intron	last intron	NA	ENST00000262315	3.91476	yes	up	0.00349501	yes	GO:0016020;GO:0031390;GO:0003677;GO:0005654;GO:0005634;GO:0005524;GO:1900264;GO:0006260;GO:0043142;GO:0003689;GO:0005515;GO:0000166;GO:0005829;GO:0007049	membrane;Ctf18 RFC-like complex;DNA binding;nucleoplasm;nucleus;ATP binding;positive regulation of DNA-directed DNA polymerase activity;DNA replication;single-stranded DNA-dependent ATPase activity;DNA clamp loader activity;protein binding;nucleotide binding;cytosol;cell cycle	.	.	.	CHTF18
ENSG00000141956	0.75569	yes	down	0.000133714	yes	chr21	-	41821501	41822500	intron	internal intron	NA	ENST00000486812	0.234237	yes	down	0.00366051	yes	GO:0003677;GO:0005634;GO:0005654;GO:0006355;GO:0008168;GO:0006351;GO:0003676;GO:0046872;GO:0016604;GO:0016740;GO:0032259	DNA binding;nucleus;nucleoplasm;regulation of transcription, DNA-templated;methyltransferase activity;transcription, DNA-templated;nucleic acid binding;metal ion binding;nuclear body;transferase activity;methylation	.	.	.	PRDM15
ENSG00000196422	1.4	yes	up	3.94331e-05	yes	chr9	+	135488001	135489000	downstream	NA	NA	ENST00000356818	3.84176	yes	up	0.00366453	yes	GO:0004864;GO:0005634;GO:0005730;GO:0005515;GO:0019902;GO:0010923	protein phosphatase inhibitor activity;nucleus;nucleolus;protein binding;phosphatase binding;negative regulation of phosphatase activity	.	.	.	PPP1R26
ENSG00000057294	1.83562	yes	up	0.000712976	yes	chr12	-	32841001	32842000	intron	internal intron	NA	ENST00000340811	3.78564	yes	up	0.00382344	yes	GO:0030054;GO:0031424;GO:0090002;GO:0086083;GO:0002159;GO:0005515;GO:0005911;GO:0017080;GO:0014704;GO:0008285;GO:0045110;GO:0086073;GO:0005654;GO:0032947;GO:0016337;GO:0007507;GO:0019215;GO:0086091;GO:0055010;GO:0010765;GO:0005912;GO:0045296;GO:0007155;GO:0034334;GO:0055088;GO:0098911;GO:2000810;GO:0070268;GO:0016264;GO:0086064;GO:0045294;GO:0016021;GO:0005886;GO:0086019;GO:0030057;GO:0086005;GO:…	cell junction;keratinization;establishment of protein localization to plasma membrane;cell adhesive protein binding involved in bundle of His cell-Purkinje myocyte communication;desmosome assembly;protein binding;cell-cell junction;sodium channel regulator activity;intercalated disc;negative regulation of cell proliferation;intermediate filament bundle assembly;bundle of His cell-Purkinje myocyte…	ko05412	Arrhythmogenic right ventricular cardiomyopathy (ARVC)	Human Diseases	PKP2
ENSG00000040199	0.441687	yes	down	6.40856e-05	yes	chr16	-	71702501	71703500	intron	internal intron	NA	ENST00000393524	0.234682	yes	down	0.00400583	yes	GO:0016020;GO:0005634;GO:0001917;GO:0007165;GO:0021766;GO:0003824;GO:0004722;GO:0005737;GO:0046872;GO:0016787;GO:0005515;GO:0005829;GO:0004721;GO:0006470;GO:0042622	membrane;nucleus;photoreceptor inner segment;signal transduction;hippocampus development;catalytic activity;protein serine/threonine phosphatase activity;cytoplasm;metal ion binding;hydrolase activity;protein binding;cytosol;phosphoprotein phosphatase activity;protein dephosphorylation;photoreceptor outer segment membrane	ko04151	PI3K-Akt signaling pathway	Environmental Information Processing	PHLPP2
ENSG00000109680	2.2053	yes	up	0.000262049	yes	chr4	+	26584001	26585000	exon	first exon	NA	ENST00000264866	0.237822	yes	down	0.00406204	yes	GO:0005515;GO:0043547;GO:0005096	protein binding;positive regulation of GTPase activity;GTPase activator activity	.	.	.	TBC1D19
ENSG00000109016	0.408578	yes	down	0.000523328	yes	chr17	+	21169001	21170000	promoter	Distal	LCP	ENST00000346603	3.82106	yes	up	0.00407653	yes	GO:0016020;GO:0005783;GO:0016021;GO:0005789;GO:0055114;GO:0016491	membrane;endoplasmic reticulum;integral component of membrane;endoplasmic reticulum membrane;oxidation-reduction process;oxidoreductase activity	.	.	.	DHRS7B
ENSG00000090432	1.47443	yes	up	0.00074755	yes	chr1	-	20510001	20511000	promoter	Distal	ICP	ENST00000264198	3.70536	yes	up	0.00427371	yes	GO:0016020;GO:0016925;GO:0071650;GO:0031625;GO:0033235;GO:0043025;GO:0005515;GO:0010821;GO:0004871;GO:0051898;GO:0031307;GO:0051646;GO:0042802;GO:1901028;GO:0007257;GO:0006915;GO:0006919;GO:0016740;GO:0016567;GO:0005741;GO:0005777;GO:0016021;GO:0005739;GO:0031648;GO:0019789;GO:0000266;GO:0050689;GO:0045824;GO:0030308;GO:0030424;GO:0090141;GO:0010637;GO:0071360;GO:0006996;GO:0004842;GO:0043123;GO:…	membrane;protein sumoylation;negative regulation of chemokine (C-C motif) ligand 5 production;ubiquitin protein ligase binding;positive regulation of protein sumoylation;neuronal cell body;protein binding;regulation of mitochondrion organization;signal transducer activity;negative regulation of protein kinase B signaling;integral component of mitochondrial outer membrane;mitochondrion localizatio…	.	.	.	MUL1
ENSG00000268758	0.660219	yes	down	2.5183e-05	yes	chr19	-	6998001	6999000	promoter	Distal	LCP	ENST00000640515	0.246182	yes	down	0.00545582	yes	.	.	.	.	.	ADGRE4P
ENSG00000091436	1.95816	yes	up	2.64423e-05	yes	chr2	+	173263001	173264000	intron	last intron	NA	ENST00000338983	3.48118	yes	up	0.00574339	yes	GO:0016310;GO:0005737;GO:0043065;GO:0005515;GO:0004672;GO:0000186;GO:0030154;GO:0000077;GO:0016301;GO:0005622;GO:0006468;GO:0007257;GO:0000075;GO:0060173;GO:0009314;GO:0007010;GO:0016740;GO:0000287;GO:0003723;GO:0005524;GO:0006950;GO:0035556;GO:0007050;GO:0042733;GO:0008283;GO:0000166;GO:0005829;GO:0005634;GO:0004709;GO:0000165;GO:0008219;GO:0046872;GO:0004674;GO:0007049	phosphorylation;cytoplasm;positive regulation of apoptotic process;protein binding;protein kinase activity;activation of MAPKK activity;cell differentiation;DNA damage checkpoint;kinase activity;intracellular;protein phosphorylation;activation of JUN kinase activity;cell cycle checkpoint;limb development;response to radiation;cytoskeleton organization;transferase activity;magnesium ion binding;RN…	ko04010	MAPK signaling pathway	Environmental Information Processing	MAP3K20
ENSG00000197566	0.611011	yes	down	7.33261e-06	yes	chr17	-	16636501	16637500	promoter	Distal	LCP	ENST00000311331	0.253541	yes	down	0.00578987	yes	GO:0003677;GO:0046872;GO:0005634;GO:0005515;GO:0006355;GO:0005622;GO:0006351;GO:0003700;GO:0003676	DNA binding;metal ion binding;nucleus;protein binding;regulation of transcription, DNA-templated;intracellular;transcription, DNA-templated;sequence-specific DNA binding transcription factor activity;nucleic acid binding	.	.	.	ZNF624
ENSG00000148488	1.68513	yes	up	0.000461078	yes	chr10	-	17330501	17331500	exon	internal exon	NA	ENST00000377602	0.250561	yes	down	0.00613359	yes	GO:0016020;GO:0009247;GO:0006486;GO:0016051;GO:0003828;GO:0097503;GO:0000139;GO:0009100;GO:0008373;GO:0016757;GO:0006493;GO:0009311;GO:0005794;GO:0016021;GO:0001574;GO:0016740	membrane;glycolipid biosynthetic process;protein glycosylation;carbohydrate biosynthetic process;alpha-N-acetylneuraminate alpha-2,8-sialyltransferase activity;sialylation;Golgi membrane;glycoprotein metabolic process;sialyltransferase activity;transferase activity, transferring glycosyl groups;protein O-linked glycosylation;oligosaccharide metabolic process;Golgi apparatus;integral component of …	.	.	.	ST8SIA6
ENSG00000159917	0.543021	yes	down	0.000621471	yes	chr19	-	44304501	44305500	promoter	Intermediate	ICP	ENST00000291182	3.58418	yes	up	0.00615721	yes	GO:0045892;GO:0003677;GO:0046872;GO:0005634;GO:0006355;GO:0005622;GO:0006351;GO:0003700;GO:0003676	negative regulation of transcription, DNA-templated;DNA binding;metal ion binding;nucleus;regulation of transcription, DNA-templated;intracellular;transcription, DNA-templated;sequence-specific DNA binding transcription factor activity;nucleic acid binding	.	.	.	ZNF235
ENSG00000151233	3.22951	yes	up	2.11567e-05	yes	chr12	-	42098001	42099000	intron	internal intron	NA	ENST00000280876	3.47026	yes	up	0.00657645	yes	GO:0035252;GO:0016020;GO:0016757;GO:0016021;GO:0016740;GO:0016266	UDP-xylosyltransferase activity;membrane;transferase activity, transferring glycosyl groups;integral component of membrane;transferase activity;O-glycan processing	ko00514	Other types of O-glycan biosynthesis	Metabolism	GXYLT1
ENSG00000142583	0.673783	yes	down	0.000457385	yes	chr1	-	9037501	9038500	downstream	NA	NA	ENST00000377424	3.4683	yes	up	0.00659625	yes	GO:0003044;GO:0016020;GO:0016324;GO:0005355;GO:0005353;GO:0005887;GO:0005975;GO:0043312;GO:0016021;GO:0005886;GO:0022891;GO:0006810;GO:0070062;GO:0055085;GO:0009750;GO:0070061;GO:0015758;GO:0008643;GO:0015755;GO:1990539;GO:0071332;GO:0042383;GO:0035579;GO:0022857;GO:0005215	regulation of systemic arterial blood pressure mediated by a chemical signal;membrane;apical plasma membrane;glucose transmembrane transporter activity;fructose transmembrane transporter activity;integral component of plasma membrane;carbohydrate metabolic process;neutrophil degranulation;integral component of membrane;plasma membrane;substrate-specific transmembrane transporter activity;transpor…	ko04973	Carbohydrate digestion and absorption	Organismal Systems	SLC2A5
ENSG00000007376	2.51709	yes	up	1.36216e-06	yes	chr16	-	787501	788500	exon	first exon	NA	ENST00000007264	3.28744	yes	up	0.00956841	yes	GO:0019239;GO:0031119;GO:0003723;GO:0000455;GO:0009451;GO:0001522;GO:0009982	deaminase activity;tRNA pseudouridine synthesis;RNA binding;enzyme-directed rRNA pseudouridine synthesis;RNA modification;pseudouridine synthesis;pseudouridine synthase activity	.	.	.	RPUSD1
ENSG00000198756	2.56881	yes	up	0.000179374	yes	chr1	-	183963001	183964000	exon	first exon	NA	ENST00000361927	0.281668	yes	down	0.0104667	yes	GO:0005788;GO:0005783;GO:0005515;GO:0016757;GO:0016740;GO:0050211	endoplasmic reticulum lumen;endoplasmic reticulum;protein binding;transferase activity, transferring glycosyl groups;transferase activity;procollagen galactosyltransferase activity	ko00514;ko00310	Other types of O-glycan biosynthesis;Lysine degradation	Metabolism;Metabolism	COLGALT2
ENSG00000070371	1.53457	yes	up	0.00071174	yes	chr22	-	19201001	19202000	intron	first intron	NA	ENST00000412649	3.22806	yes	up	0.0105381	yes	GO:0016020;GO:0000278;GO:0005770;GO:0030130;GO:0031410;GO:0016192;GO:0046326;GO:0097443;GO:0005515;GO:0005829;GO:0048268;GO:0030135;GO:0005819;GO:0004871;GO:0032051;GO:0030659;GO:0070062;GO:0009653;GO:0007165;GO:0030136;GO:0005622;GO:0042147;GO:0005802;GO:0061024;GO:0006886;GO:0030132;GO:0006898;GO:0005905;GO:0005198;GO:0071439	membrane;mitotic cell cycle;late endosome;clathrin coat of trans-Golgi network vesicle;cytoplasmic vesicle;vesicle-mediated transport;positive regulation of glucose import;sorting endosome;protein binding;cytosol;clathrin coat assembly;coated vesicle;spindle;signal transducer activity;clathrin light chain binding;cytoplasmic vesicle membrane;extracellular vesicular exosome;anatomical structure mo…	ko05016;ko04961;ko04144;ko04142;ko05100;ko04721	Huntington's disease;Endocrine and other factor-regulated calcium reabsorption;Endocytosis;Lysosome;Bacterial invasion of epithelial cells;Synaptic vesicle cycle	Human Diseases;Organismal Systems;Cellular Processes;Cellular Processes;Human Diseases;Organismal Systems	CLTCL1
ENSG00000151746	0.655832	yes	down	0.000303922	yes	chr12	+	32381501	32382500	exon	last exon	NA	ENST00000548411	0.28238	yes	down	0.0105928	yes	GO:0045298;GO:0070840;GO:0016020;GO:0006396;GO:1900737;GO:0034452;GO:0072517;GO:0005881;GO:0031410;GO:0005515;GO:0005829;GO:0017137;GO:0006810;GO:0005856;GO:1900276;GO:0034063;GO:0009653;GO:0008298;GO:0072393;GO:0005200;GO:0005802;GO:0016032;GO:0008093;GO:0048471;GO:1900275;GO:0033365;GO:0005794;GO:0031871;GO:0072385;GO:0048260	tubulin complex;dynein complex binding;membrane;RNA processing;negative regulation of phospholipase C-activating G-protein coupled receptor signaling pathway;dynactin binding;host cell viral assembly compartment;cytoplasmic microtubule;cytoplasmic vesicle;protein binding;cytosol;Rab GTPase binding;transport;cytoskeleton;regulation of proteinase activated receptor activity;stress granule assembly;…	.	.	.	BICD1
ENSG00000120837	2.8664	yes	up	1.59049e-12	yes	chr12	-	104115001	104116000	downstream	NA	NA	ENST00000551727	3.25418	yes	up	0.0106105	yes	GO:0003677;GO:0006355;GO:0046982;GO:0045540;GO:0045893;GO:0016602;GO:0005515;GO:0043565;GO:0003700;GO:0090575;GO:0005634;GO:0005654;GO:0070491;GO:0006351;GO:0044212;GO:0032993;GO:0000980;GO:0032403	DNA binding;regulation of transcription, DNA-templated;protein heterodimerization activity;regulation of cholesterol biosynthetic process;positive regulation of transcription, DNA-templated;CCAAT-binding factor complex;protein binding;sequence-specific DNA binding;sequence-specific DNA binding transcription factor activity;RNA polymerase II transcription factor complex;nucleus;nucleoplasm;repress…	ko05152;ko05166;ko04612	Tuberculosis;HTLV-I infection;Antigen processing and presentation	Human Diseases;Human Diseases;Organismal Systems	NFYB
ENSG00000151233	3.22951	yes	up	2.11567e-05	yes	chr12	-	42098001	42099000	intron	internal intron	NA	ENST00000398675	0.285895	yes	down	0.0110532	yes	GO:0035252;GO:0016020;GO:0016757;GO:0016021;GO:0016740;GO:0016266	UDP-xylosyltransferase activity;membrane;transferase activity, transferring glycosyl groups;integral component of membrane;transferase activity;O-glycan processing	ko00514	Other types of O-glycan biosynthesis	Metabolism	GXYLT1
ENSG00000090565	0.683226	yes	down	0.000330454	yes	chr16	+	509501	510500	exon	first exon	NA	ENST00000434585	0.277733	yes	down	0.0114262	yes	GO:0016020;GO:0061512;GO:0005737;GO:0070164;GO:0030496;GO:0016192;GO:0055038;GO:0005515;GO:0005829;GO:0055037;GO:0017137;GO:0051959;GO:0006810;GO:0043231;GO:0005856;GO:0005654;GO:0005815;GO:0005622;GO:0000910;GO:0005813;GO:0042803;GO:0005768;GO:0045171;GO:0046872;GO:0032154;GO:0030306;GO:0051301;GO:0005509;GO:0032456;GO:0007049	membrane;protein localization to cilium;cytoplasm;negative regulation of adiponectin secretion;midbody;vesicle-mediated transport;recycling endosome membrane;protein binding;cytosol;recycling endosome;Rab GTPase binding;dynein light intermediate chain binding;transport;intracellular membrane-bounded organelle;cytoskeleton;nucleoplasm;microtubule organizing center;intracellular;cytokinesis;centros…	ko04144	Endocytosis	Cellular Processes	RAB11FIP3
ENSG00000110318	0.621287	yes	down	0.000555235	yes	chr11	+	101976501	101977500	promoter	Intermediate	LCP	ENST00000263468	0.285965	yes	down	0.0131788	yes	GO:0005856;GO:0005815;GO:0042995;GO:0005813;GO:0030030;GO:0005737;GO:0030496;GO:0060271;GO:0005515;GO:0007052;GO:0097546;GO:0031122	cytoskeleton;microtubule organizing center;cell projection;centrosome;cell projection organization;cytoplasm;midbody;cilium morphogenesis;protein binding;mitotic spindle organization;ciliary base;cytoplasmic microtubule organization	.	.	.	CEP126
ENSG00000162512	0.621343	yes	down	0.000122171	yes	chr1	-	30880501	30881500	exon	first exon	NA	ENST00000336798	3.15393	yes	up	0.0133234	yes	GO:0016020;GO:0016477;GO:0050900;GO:0006024;GO:0005796;GO:0009986;GO:0001523;GO:0016021;GO:0043202;GO:0006027;GO:0005886;GO:0030203	membrane;cell migration;leukocyte migration;glycosaminoglycan biosynthetic process;Golgi lumen;cell surface;retinoid metabolic process;integral component of membrane;lysosomal lumen;glycosaminoglycan catabolic process;plasma membrane;glycosaminoglycan metabolic process	ko04514	Cell adhesion molecules (CAMs)	Environmental Information Processing	SDC3
ENSG00000154237	1.18277	yes	up	5.34939e-05	yes	chr15	+	101077501	101078500	downstream	NA	NA	ENST00000526457	0.295624	yes	down	0.0136948	yes	GO:0050731;GO:0016310;GO:0005524;GO:0035556;GO:0005737;GO:1902533;GO:0005515;GO:0005829;GO:0007264;GO:0000166;GO:0004672;GO:0050732;GO:0004871;GO:0005739;GO:0045453;GO:0016301;GO:0042802;GO:0006468;GO:0090263;GO:0046872;GO:0004674;GO:0005525;GO:0016740;GO:0036035	positive regulation of peptidyl-tyrosine phosphorylation;phosphorylation;ATP binding;intracellular signal transduction;cytoplasm;positive regulation of intracellular signal transduction;protein binding;cytosol;small GTPase mediated signal transduction;nucleotide binding;protein kinase activity;negative regulation of peptidyl-tyrosine phosphorylation;signal transducer activity;mitochondrion;bone r…	.	.	.	LRRK1
ENSG00000146373	1.96405	yes	up	6.51997e-05	yes	chr6	+	125076001	125077000	intron	internal intron	NA	ENST00000521654	2.97062	yes	up	0.0143282	yes	GO:0016020;GO:0061630;GO:0016567;GO:0032436;GO:0042787;GO:0005737;GO:0031624;GO:0004842;GO:0046872;GO:0005829;GO:0000151;GO:0016021;GO:0016740;GO:0000209	membrane;ubiquitin protein ligase activity;protein ubiquitination;positive regulation of proteasomal ubiquitin-dependent protein catabolic process;protein ubiquitination involved in ubiquitin-dependent protein catabolic process;cytoplasm;ubiquitin conjugating enzyme binding;ubiquitin-protein transferase activity;metal ion binding;cytosol;ubiquitin ligase complex;integral component of membrane;tra…	.	.	.	RNF217
ENSG00000138778	0.384615	yes	down	2.99313e-05	yes	chr4	-	103175501	103176500	intron	internal intron	NA	ENST00000380026	2.96509	yes	up	0.015483	yes	GO:0016020;GO:0005874;GO:0003774;GO:0005737;GO:0007080;GO:0005515;GO:0005623;GO:0000940;GO:0051310;GO:0030071;GO:0000777;GO:0016887;GO:0005856;GO:0015630;GO:0005694;GO:0008017;GO:0043515;GO:0007079;GO:0007275;GO:0003777;GO:0000776;GO:0000278;GO:0005524;GO:0007059;GO:0000779;GO:1990023;GO:0030496;GO:0005829;GO:0000166;GO:0045860;GO:0005819;GO:0051382;GO:0005871;GO:0005634;GO:0007018;GO:0051315;GO:…	membrane;microtubule;motor activity;cytoplasm;mitotic metaphase plate congression;protein binding;cell;condensed chromosome outer kinetochore;metaphase plate congression;regulation of mitotic metaphase/anaphase transition;condensed chromosome kinetochore;ATPase activity;cytoskeleton;microtubule cytoskeleton;chromosome;microtubule binding;kinetochore binding;mitotic chromosome movement towards spi…	.	.	.	CENPE
ENSG00000156011	1.57522	yes	up	0.000605502	yes	chr8	-	18808501	18809500	promoter	Intermediate	LCP	ENST00000327040	2.91262	yes	up	0.0168399	yes	GO:0016020;GO:0042995;GO:0030054;GO:0032587;GO:0005085;GO:0005086;GO:0043547;GO:0014069;GO:0005543;GO:0032012;GO:0005886;GO:0045202;GO:0045211	membrane;cell projection;cell junction;ruffle membrane;guanyl-nucleotide exchange factor activity;ARF guanyl-nucleotide exchange factor activity;positive regulation of GTPase activity;postsynaptic density;phospholipid binding;regulation of ARF protein signal transduction;plasma membrane;synapse;postsynaptic membrane	ko04144	Endocytosis	Cellular Processes	PSD3
ENSG00000133131	1.65551	yes	up	0.000802047	yes	chrX	-	106999501	107000500	promoter	Intermediate	ICP	ENST00000255495	3.01091	yes	up	0.0168842	yes	GO:0005654;GO:0046872;GO:0005634;GO:0005515;GO:0008270	nucleoplasm;metal ion binding;nucleus;protein binding;zinc ion binding	.	.	.	MORC4
ENSG00000054392	1.41152	yes	up	0.000635845	yes	chr1	+	210623501	210624500	intron	last intron	NA	ENST00000545154	2.99645	yes	up	0.0172905	yes	GO:0018345;GO:0016020;GO:0005783;GO:0016746;GO:0016409;GO:0007275;GO:0000166;GO:0016021;GO:0007224;GO:0016740;GO:0005525;GO:0005789;GO:0008374	protein palmitoylation;membrane;endoplasmic reticulum;transferase activity, transferring acyl groups;palmitoyltransferase activity;multicellular organismal development;nucleotide binding;integral component of membrane;smoothened signaling pathway;transferase activity;GTP binding;endoplasmic reticulum membrane;O-acyltransferase activity	.	.	.	HHAT
ENSG00000134247	1.28203	yes	up	0.000543113	yes	chr1	+	116960501	116961500	exon	internal exon	NA	ENST00000393203	2.89267	yes	up	0.0179757	yes	GO:0016020;GO:0005783;GO:0034389;GO:0009986;GO:0005515;GO:0005794;GO:0016021;GO:0005789;GO:0005886	membrane;endoplasmic reticulum;lipid particle organization;cell surface;protein binding;Golgi apparatus;integral component of membrane;endoplasmic reticulum membrane;plasma membrane	.	.	.	PTGFRN
ENSG00000070371	1.53457	yes	up	0.00071174	yes	chr22	-	19201001	19202000	intron	first intron	NA	ENST00000615606	2.87651	yes	up	0.0180185	yes	GO:0016020;GO:0000278;GO:0005770;GO:0030130;GO:0031410;GO:0016192;GO:0046326;GO:0097443;GO:0005515;GO:0005829;GO:0048268;GO:0030135;GO:0005819;GO:0004871;GO:0032051;GO:0030659;GO:0070062;GO:0009653;GO:0007165;GO:0030136;GO:0005622;GO:0042147;GO:0005802;GO:0061024;GO:0006886;GO:0030132;GO:0006898;GO:0005905;GO:0005198;GO:0071439	membrane;mitotic cell cycle;late endosome;clathrin coat of trans-Golgi network vesicle;cytoplasmic vesicle;vesicle-mediated transport;positive regulation of glucose import;sorting endosome;protein binding;cytosol;clathrin coat assembly;coated vesicle;spindle;signal transducer activity;clathrin light chain binding;cytoplasmic vesicle membrane;extracellular vesicular exosome;anatomical structure mo…	ko05016;ko04961;ko04144;ko04142;ko05100;ko04721	Huntington's disease;Endocrine and other factor-regulated calcium reabsorption;Endocytosis;Lysosome;Bacterial invasion of epithelial cells;Synaptic vesicle cycle	Human Diseases;Organismal Systems;Cellular Processes;Cellular Processes;Human Diseases;Organismal Systems	CLTCL1
ENSG00000249115	0.526998	yes	down	0.000115809	yes	chr19	+	35618501	35619500	promoter	Intermediate	LCP	ENST00000585968	2.92032	yes	up	0.0180376	yes	GO:0005856;GO:0005815;GO:0007098;GO:0005874;GO:0051225;GO:0005813;GO:0005737;GO:0010389;GO:0070652;GO:0005829;GO:0051301;GO:0005819;GO:0000086;GO:0007049	cytoskeleton;microtubule organizing center;centrosome cycle;microtubule;spindle assembly;centrosome;cytoplasm;regulation of G2/M transition of mitotic cell cycle;HAUS complex;cytosol;cell division;spindle;G2/M transition of mitotic cell cycle;cell cycle	.	.	.	HAUS5
ENSG00000185630	0.572795	yes	down	0.000197287	yes	chr1	+	164785501	164786500	promoter	Distal	LCP	ENST00000420696	2.89435	yes	up	0.018871	yes	GO:0042127;GO:0035019;GO:0001077;GO:0048568;GO:0005737;GO:0001658;GO:0005515;GO:0003700;GO:0005654;GO:0000978;GO:0030154;GO:0007548;GO:0000977;GO:0045944;GO:0030325;GO:0007275;GO:0048706;GO:0009954;GO:0009952;GO:0003677;GO:0006355;GO:0046982;GO:0035162;GO:0005667;GO:0048536;GO:0043565;GO:0090575;GO:0006694;GO:0005634;GO:0001655;GO:0048538;GO:0006351;GO:0030326;GO:0006366;GO:0030278;GO:0045665;GO:…	regulation of cell proliferation;somatic stem cell maintenance;RNA polymerase II core promoter proximal region sequence-specific DNA binding transcription factor activity involved in positive regulation of transcription;embryonic organ development;cytoplasm;branching involved in ureteric bud morphogenesis;protein binding;sequence-specific DNA binding transcription factor activity;nucleoplasm;RNA …	ko05202;ko04927	Transcriptional misregulation in cancer;Cortisol synthesis and secretionè½New!	Human Diseases;Organismal Systems	PBX1
ENSG00000074590	0.318052	yes	down	0.000311223	yes	chr12	-	106138001	106139000	exon	first exon	NA	ENST00000261402	0.308417	yes	down	0.0194677	yes	GO:0016310;GO:0005524;GO:0035507;GO:0042127;GO:0035556;GO:0005737;GO:0005515;GO:0000166;GO:0004672;GO:0001650;GO:0030155;GO:0006974;GO:0005634;GO:0005654;GO:0002039;GO:0016301;GO:0015630;GO:0006468;GO:1901796;GO:0046872;GO:0007155;GO:0004674;GO:2000772;GO:0016740	phosphorylation;ATP binding;regulation of myosin-light-chain-phosphatase activity;regulation of cell proliferation;intracellular signal transduction;cytoplasm;protein binding;nucleotide binding;protein kinase activity;fibrillar center;regulation of cell adhesion;cellular response to DNA damage stimulus;nucleus;nucleoplasm;p53 binding;kinase activity;microtubule cytoskeleton;protein phosphorylatio…	.	.	.	NUAK1
ENSG00000213563	1.52771	yes	up	0.000401662	yes	chr8	-	144530001	144531000	promoter	Distal	ICP	ENST00000534680	2.91241	yes	up	0.0196326	yes	.	.	.	.	.	C8orf82
ENSG00000132970	0.729779	yes	down	9.04451e-06	yes	chr13	+	26685001	26686000	exon	last exon	NA	ENST00000335327	2.82148	yes	up	0.0220091	yes	GO:0030032;GO:0070062;GO:0005856;GO:0030036;GO:0030027;GO:0008360;GO:0005737;GO:0003779;GO:0014003;GO:0007010;GO:0031643;GO:0030041;GO:0006461	lamellipodium assembly;extracellular vesicular exosome;cytoskeleton;actin cytoskeleton organization;lamellipodium;regulation of cell shape;cytoplasm;actin binding;oligodendrocyte development;cytoskeleton organization;positive regulation of myelination;actin filament polymerization;protein complex assembly	ko04666;ko04520;ko05231	Fc gamma R-mediated phagocytosis;Adherens junction;Choline metabolism in cancer	Organismal Systems;Cellular Processes;Human Diseases	WASF3
ENSG00000079215	0.678825	yes	down	0.000295051	yes	chr5	+	36683001	36684000	intron	last intron	NA	ENST00000265113	2.90655	yes	up	0.0220322	yes	GO:0070779;GO:0016020;GO:0016597;GO:0071944;GO:0043025;GO:0046677;GO:0005887;GO:0015501;GO:1902476;GO:0005313;GO:0009611;GO:0042493;GO:0050806;GO:0009449;GO:0048667;GO:0043005;GO:0006536;GO:0006865;GO:0031223;GO:0050885;GO:0042995;GO:0006537;GO:0009416;GO:0015293;GO:0015172;GO:0016021;GO:0015813;GO:0001504;GO:0005886;GO:0006810;GO:0055085;GO:0089711;GO:0098712;GO:0006811;GO:0051938;GO:0016595;GO:…	D-aspartate import;membrane;amino acid binding;cell periphery;neuronal cell body;response to antibiotic;integral component of plasma membrane;glutamate:sodium symporter activity;chloride transmembrane transport;L-glutamate transmembrane transporter activity;response to wounding;response to drug;positive regulation of synaptic transmission;gamma-aminobutyric acid biosynthetic process;cell morphoge…	ko04724	Glutamatergic synapse	Organismal Systems	SLC1A3
ENSG00000214279	1.73279	yes	up	9.05683e-05	yes	chr10	+	133457501	133458500	exon	internal exon	NA	ENST00000482993	0.318725	yes	down	0.0221822	yes	GO:0016020;GO:0005903;GO:0002456;GO:0005737;GO:0005044;GO:0002376;GO:0006898;GO:0016021	membrane;brush border;T cell mediated immunity;cytoplasm;scavenger receptor activity;immune system process;receptor-mediated endocytosis;integral component of membrane	.	.	.	SCART1
ENSG00000153885	0.65747	yes	down	0.000353781	yes	chr19	+	33811501	33812500	downstream	NA	NA	ENST00000430256	2.89793	yes	up	0.0223816	yes	GO:0005515;GO:0042802;GO:0007275;GO:0051260	protein binding;identical protein binding;multicellular organismal development;protein homooligomerization	.	.	.	KCTD15
ENSG00000157227	2.31049	yes	up	2.95485e-08	yes	chr14	+	22847501	22848500	downstream	NA	NA	ENST00000311852	2.79829	yes	up	0.0228345	yes	GO:0016020;GO:0016477;GO:0005615;GO:0008233;GO:0030335;GO:0031410;GO:0043627;GO:0005737;GO:0008584;GO:0016504;GO:0005178;GO:0005887;GO:0005515;GO:0016787;GO:0016485;GO:0048754;GO:0001935;GO:0009612;GO:0001525;GO:0005925;GO:0044354;GO:0045579;GO:0001541;GO:0001666;GO:0043615;GO:0006979;GO:0022617;GO:0006508;GO:0097094;GO:0031638;GO:0030574;GO:0048771;GO:0030324;GO:0014070;GO:0004222;GO:0030307;GO:…	membrane;cell migration;extracellular space;peptidase activity;positive regulation of cell migration;cytoplasmic vesicle;response to estrogen;cytoplasm;male gonad development;peptidase activator activity;integrin binding;integral component of plasma membrane;protein binding;hydrolase activity;protein processing;branching morphogenesis of an epithelial tube;endothelial cell proliferation;response …	ko04912;ko04668	GnRH signaling pathway;TNF signaling pathway	Organismal Systems;Environmental Information Processing	MMP14
ENSG00000170385	inf	yes	up	0.000432902	yes	chr1	-	211577501	211578500	promoter	Proximal	HCP	ENST00000367001	0.323787	yes	down	0.024196	yes	GO:0016020;GO:0005783;GO:0071585;GO:0006829;GO:0005737;GO:0005515;GO:0016021;GO:0006874;GO:0005886;GO:0071584;GO:0070574;GO:0071577;GO:0030315;GO:0006810;GO:0090281;GO:0055085;GO:0031965;GO:0019855;GO:0006882;GO:0001701;GO:0010043;GO:0006812;GO:0006811;GO:0005385;GO:0061088;GO:0065009;GO:0070509;GO:0005794;GO:0046929;GO:0008324	membrane;endoplasmic reticulum;detoxification of cadmium ion;zinc ion transport;cytoplasm;protein binding;integral component of membrane;cellular calcium ion homeostasis;plasma membrane;negative regulation of zinc ion transmembrane import;cadmium ion transmembrane transport;zinc ion transmembrane transport;T-tubule;transport;negative regulation of calcium ion import;transmembrane transport;nuclea…	ko04978	Mineral absorption	Organismal Systems	SLC30A1
ENSG00000185920	1.4692	yes	up	0.000142834	yes	chr9	-	95496001	95497000	promoter	Distal	LCP	ENST00000546744	0.320227	yes	down	0.0252346	yes	GO:0010157;GO:0001841;GO:0016020;GO:0043616;GO:0061053;GO:0043433;GO:0007420;GO:0042593;GO:0008158;GO:0016485;GO:0045668;GO:0008201;GO:0007224;GO:0008285;GO:0030332;GO:0009953;GO:0007165;GO:0044294;GO:0060037;GO:0014069;GO:0005119;GO:0008544;GO:0005113;GO:0060644;GO:0005929;GO:0072203;GO:0051782;GO:0014070;GO:0035137;GO:0030666;GO:0030496;GO:0045893;GO:0003007;GO:0045879;GO:0097108;GO:0000122;GO:…	response to chlorate;neural tube formation;membrane;keratinocyte proliferation;somite development;negative regulation of sequence-specific DNA binding transcription factor activity;brain development;glucose homeostasis;hedgehog receptor activity;protein processing;negative regulation of osteoblast differentiation;heparin binding;smoothened signaling pathway;negative regulation of cell proliferati…	ko05217;ko05200;ko04360;ko04024;ko05205;ko04340	Basal cell carcinoma;Pathways in cancer;Axon guidance;cAMP signaling pathway;Proteoglycans in cancer;Hedgehog signaling pathway	Human Diseases;Human Diseases;Organismal Systems;Environmental Information Processing;Human Diseases;Environmental Information Processing	PTCH1
ENSG00000189350	0.367742	yes	down	8.64646e-06	yes	chr2	+	29030501	29031500	promoter	Distal	LCP	ENST00000379558	0.329403	yes	down	0.0253358	yes	.	.	.	.	.	TOGARAM2
ENSG00000069188	1.80085	yes	up	7.47476e-05	yes	chr17	-	73394501	73395500	intron	internal intron	NA	ENST00000392650	2.70893	yes	up	0.0262321	yes	GO:0016020;GO:0030054;GO:0010842;GO:0045216;GO:0007416;GO:0007155;GO:0007156;GO:0016021;GO:0005886;GO:0045202;GO:0060219	membrane;cell junction;retina layer formation;cell-cell junction organization;synapse assembly;cell adhesion;homophilic cell adhesion via plasma membrane adhesion molecules;integral component of membrane;plasma membrane;synapse;camera-type eye photoreceptor cell differentiation	.	.	.	SDK2
ENSG00000196123	0.590631	yes	down	0.000176207	yes	chr16	-	67183001	67184000	exon	first exon	NA	ENST00000563902	2.73021	yes	up	0.027762	yes	.	.	.	.	.	KIAA0895L
ENSG00000137474	1.60709	yes	up	0.000110621	yes	chr11	+	77194501	77195500	intron	internal intron	NA	ENST00000409709	2.64625	yes	up	0.0281243	yes	GO:0030048;GO:0051015;GO:0016324;GO:0005938;GO:0060113;GO:0047485;GO:0003774;GO:0007601;GO:0005737;GO:0042472;GO:0001845;GO:0005515;GO:0031477;GO:0006909;GO:0005765;GO:0005856;GO:0051875;GO:0001917;GO:1990435;GO:0001750;GO:0006886;GO:0043531;GO:0042491;GO:0051904;GO:0016459;GO:0000146;GO:0042462;GO:0030898;GO:0060088;GO:0007600;GO:0005524;GO:0042470;GO:0042490;GO:0005829;GO:0000166;GO:0050953;GO:…	actin filament-based movement;actin filament binding;apical plasma membrane;cell cortex;inner ear receptor cell differentiation;protein N-terminus binding;motor activity;visual perception;cytoplasm;inner ear morphogenesis;phagolysosome assembly;protein binding;myosin VII complex;phagocytosis;lysosomal membrane;cytoskeleton;pigment granule localization;photoreceptor inner segment;upper tip-link de…	.	.	.	MYO7A
ENSG00000176155	0.671642	yes	down	0.00031921	yes	chr17	-	82185501	82186500	downstream	NA	NA	ENST00000392343	2.65638	yes	up	0.0281243	yes	GO:0005515	protein binding	.	.	.	CCDC57
ENSG00000080493	0.333333	yes	down	0.000154249	yes	chr4	+	71567501	71568500	downstream	NA	NA	ENST00000264485	0.338078	yes	down	0.0284792	yes	GO:0016323;GO:0016020;GO:0035725;GO:0005452;GO:0015293;GO:0005887;GO:0005515;GO:0008510;GO:0016021;GO:0098656;GO:0006814;GO:0005886;GO:0006810;GO:0006820;GO:0070062;GO:0055085;GO:0051453;GO:0006811;GO:0015701;GO:0015698;GO:0005215;GO:0008509	basolateral plasma membrane;membrane;sodium ion transmembrane transport;inorganic anion exchanger activity;symporter activity;integral component of plasma membrane;protein binding;sodium:bicarbonate symporter activity;integral component of membrane;anion transmembrane transport;sodium ion transport;plasma membrane;transport;anion transport;extracellular vesicular exosome;transmembrane transport;r…	ko04976;ko04964;ko04972	Bile secretion;Proximal tubule bicarbonate reclamation;Pancreatic secretion	Organismal Systems;Organismal Systems;Organismal Systems	SLC4A4
ENSG00000133067	1.55044	yes	up	0.000363472	yes	chr1	+	202192001	202193000	promoter	Intermediate	ICP	ENST00000255432	0.344616	yes	down	0.0305125	yes	GO:0016020;GO:0030335;GO:0042246;GO:0031982;GO:0032588;GO:0005515;GO:0005887;GO:0004888;GO:0016021;GO:0004871;GO:0005886;GO:0007186;GO:0007165;GO:0090263;GO:0030177;GO:0016055;GO:1990523	membrane;positive regulation of cell migration;tissue regeneration;vesicle;trans-Golgi network membrane;protein binding;integral component of plasma membrane;transmembrane signaling receptor activity;integral component of membrane;signal transducer activity;plasma membrane;G-protein coupled receptor signaling pathway;signal transduction;positive regulation of canonical Wnt signaling pathway;posit…	.	.	.	LGR6
ENSG00000047230	0.574324	yes	down	0.000138352	yes	chrX	-	16672501	16673500	promoter	Distal	LCP	ENST00000380241	2.68639	yes	up	0.0305798	yes	GO:0005524;GO:0006220;GO:0006241;GO:0015949;GO:0003883;GO:0016874;GO:0006541;GO:0005515;GO:0006221;GO:0005829;GO:0000166;GO:0044210	ATP binding;pyrimidine nucleotide metabolic process;CTP biosynthetic process;nucleobase-containing small molecule interconversion;CTP synthase activity;ligase activity;glutamine metabolic process;protein binding;pyrimidine nucleotide biosynthetic process;cytosol;nucleotide binding;'de novo' CTP biosynthetic process	ko00240	Pyrimidine metabolism	Metabolism	CTPS2
ENSG00000135378	0.643653	yes	down	0.000143682	yes	chr11	+	32830501	32831500	intron	internal intron	NA	ENST00000257836	2.58641	yes	up	0.0313459	yes	GO:0016020;GO:0005509;GO:0005576;GO:0016021	membrane;calcium ion binding;extracellular region;integral component of membrane	.	.	.	PRRG4
ENSG00000170312	1.69189	yes	up	0.000434384	yes	chr10	+	60780001	60781000	intron	first intron	NA	ENST00000395284	2.68796	yes	up	0.0317326	yes	GO:0031100;GO:0016020;GO:0007095;GO:0007098;GO:0005737;GO:0004693;GO:0004672;GO:0014038;GO:0030544;GO:0016572;GO:0030332;GO:0014075;GO:0070062;GO:0005654;GO:0006915;GO:0046686;GO:0018105;GO:0005789;GO:0046718;GO:0005759;GO:0007077;GO:0014070;GO:0000278;GO:0010468;GO:0005524;GO:0097125;GO:0009636;GO:0030496;GO:0034501;GO:0000166;GO:0097472;GO:0005739;GO:0090166;GO:0000226;GO:0010243;GO:0060045;GO:…	organ regeneration;membrane;mitotic G2 DNA damage checkpoint;centrosome cycle;cytoplasm;cyclin-dependent protein serine/threonine kinase activity;protein kinase activity;regulation of Schwann cell differentiation;Hsp70 protein binding;histone phosphorylation;cyclin binding;response to amine;extracellular vesicular exosome;nucleoplasm;apoptotic process;response to cadmium ion;peptidyl-serine phosp…	ko04218;ko05169;ko05203;ko04914;ko04540;ko05168;ko04115;ko04110;ko04114	Cellular senescence;Epstein-Barr virus infection;Viral carcinogenesis;Progesterone-mediated oocyte maturation;Gap junction;Herpes simplex infection;p53 signaling pathway;Cell cycle;Oocyte meiosis	Cellular Processes;Human Diseases;Human Diseases;Organismal Systems;Cellular Processes;Human Diseases;Cellular Processes;Cellular Processes;Cellular Processes	CDK1
ENSG00000078081	0.598407	yes	down	0.000697095	yes	chr3	-	183155501	183156500	downstream	NA	NA	ENST00000265598	2.61474	yes	up	0.0331358	yes	GO:0043154;GO:0016020;GO:0031410;GO:0031982;GO:0002376;GO:0016021;GO:0010506;GO:1901799;GO:0005769;GO:0005886;GO:0030659;GO:0043231;GO:0005765;GO:0005634;GO:0005764;GO:0010628;GO:0002250;GO:0048471;GO:0097233;GO:0035455	negative regulation of cysteine-type endopeptidase activity involved in apoptotic process;membrane;cytoplasmic vesicle;vesicle;immune system process;integral component of membrane;regulation of autophagy;negative regulation of proteasomal protein catabolic process;early endosome;plasma membrane;cytoplasmic vesicle membrane;intracellular membrane-bounded organelle;lysosomal membrane;nucleus;lysoso…	ko04142	Lysosome	Cellular Processes	LAMP3
ENSG00000114770	1.61924	yes	up	2.53294e-05	yes	chr3	-	184016501	184017500	exon	first exon	NA	ENST00000437205	2.67393	yes	up	0.0341092	yes	GO:0016020;GO:0006810;GO:0055085;GO:0015711;GO:0005524;GO:0042626;GO:0043225;GO:0005887;GO:0000166;GO:0030213;GO:0016021;GO:0008514;GO:0005886;GO:0016887	membrane;transport;transmembrane transport;organic anion transport;ATP binding;ATPase activity, coupled to transmembrane movement of substances;anion transmembrane-transporting ATPase activity;integral component of plasma membrane;nucleotide binding;hyaluronan biosynthetic process;integral component of membrane;organic anion transmembrane transporter activity;plasma membrane;ATPase activity	ko02010;ko01523	ABC transporters;Antifolate resistance	Environmental Information Processing;Human Diseases	ABCC5
ENSG00000186448	5.95	yes	up	0.00097734	yes	chr3	+	44585001	44586000	intron	first intron	NA	ENST00000334075	0.343397	yes	down	0.0353505	yes	GO:0003677;GO:0046872;GO:0005634;GO:0006355;GO:0005622;GO:0006351;GO:0003700;GO:0003676	DNA binding;metal ion binding;nucleus;regulation of transcription, DNA-templated;intracellular;transcription, DNA-templated;sequence-specific DNA binding transcription factor activity;nucleic acid binding	.	.	.	ZNF197
ENSG00000277586	0.535484	yes	down	0.000852706	yes	chr8	-	24952501	24953500	exon	internal exon	NA	ENST00000610854	2.63392	yes	up	0.035411	yes	GO:0045109;GO:0021766;GO:0043274;GO:0005737;GO:0030426;GO:0021987;GO:0005515;GO:0008090;GO:0045110;GO:0042802;GO:0043209;GO:0043524;GO:0050772;GO:0031133;GO:0043005;GO:0008022;GO:0005883;GO:0050885;GO:0008089;GO:0060052;GO:0019896;GO:0051412;GO:0030674;GO:0046982;GO:0021510;GO:0043547;GO:0045105;GO:0009636;GO:0033693;GO:0048812;GO:0005829;GO:0010033;GO:0030424;GO:0000165;GO:0061564;GO:0033596;GO:…	intermediate filament organization;hippocampus development;phospholipase binding;cytoplasm;growth cone;cerebral cortex development;protein binding;retrograde axon cargo transport;intermediate filament bundle assembly;identical protein binding;myelin sheath;negative regulation of neuron apoptotic process;positive regulation of axonogenesis;regulation of axon diameter;neuron projection;protein C-te…	ko05014	Amyotrophic lateral sclerosis (ALS)	Human Diseases	NEFL
ENSG00000198178	1.49686	yes	up	0.000136236	yes	chr12	-	7745501	7746500	intron	internal intron	NA	ENST00000542353	0.344971	yes	down	0.035903	yes	GO:0016020;GO:0030667;GO:0002223;GO:0002250;GO:0030246;GO:0002376;GO:0043312;GO:0016021;GO:0070821;GO:0045087;GO:0005886	membrane;secretory granule membrane;stimulatory C-type lectin receptor signaling pathway;adaptive immune response;carbohydrate binding;immune system process;neutrophil degranulation;integral component of membrane;tertiary granule membrane;innate immune response;plasma membrane	.	.	.	CLEC4C
ENSG00000100311	2.10747	yes	up	0.000212156	yes	chr22	-	39245001	39246000	promoter	Distal	ICP	ENST00000331163	0.343306	yes	down	0.0361213	yes	GO:1902895;GO:0016020;GO:0008083;GO:0030335;GO:0048008;GO:0031954;GO:0005737;GO:0046854;GO:0001892;GO:0048407;GO:0071363;GO:0032091;GO:0009611;GO:0007507;GO:0042802;GO:0014068;GO:0048146;GO:0035655;GO:0016176;GO:0018105;GO:0005518;GO:0050921;GO:0030198;GO:0043536;GO:0045737;GO:0045893;GO:0090280;GO:0005576;GO:0001938;GO:0042056;GO:0045840;GO:0018108;GO:0031012;GO:0000165;GO:0003104;GO:0042803;GO:…	positive regulation of pri-miRNA transcription from RNA polymerase II promoter;membrane;growth factor activity;positive regulation of cell migration;platelet-derived growth factor receptor signaling pathway;positive regulation of protein autophosphorylation;cytoplasm;phosphatidylinositol phosphorylation;embryonic placenta development;platelet-derived growth factor binding;cellular response to gro…	ko04015;ko05215;ko04060;ko04072;ko04810;ko04010;ko05206;ko04014;ko04540;ko05214;ko05218;ko01521;ko05200;ko05418;ko04510;ko05166;ko05231;ko05211;ko05167;ko04151;ko04630	Rap1 signaling pathway;Prostate cancer;Cytokine-cytokine receptor interaction;Phospholipase D signaling pathway;Regulation of actin cytoskeleton;MAPK signaling pathway;MicroRNAs in cancer;Ras signaling pathway;Gap junction;Glioma;Melanoma;EGFR tyrosine kinase inhibitor resistance;Pathways in cancer;Fluid shear stress and atherosclerosis;Focal adhesion;HTLV-I infection;Choline metabolism in cancer…	Environmental Information Processing;Human Diseases;Environmental Information Processing;Environmental Information Processing;Cellular Processes;Environmental Information Processing;Human Diseases;Environmental Information Processing;Cellular Processes;Human Diseases;Human Diseases;Human Diseases;Human Diseases;Human Diseases;Cellular Processes;Human Diseases;Human Diseases;Human Diseases;Human D…	PDGFB
ENSG00000124313	-inf	yes	down	0.000296421	yes	chrX	-	53320501	53321500	exon	first exon	NA	ENST00000640694	0.354906	yes	down	0.0363774	yes	GO:0030036;GO:0032012;GO:0005086;GO:0043547;GO:0005737	actin cytoskeleton organization;regulation of ARF protein signal transduction;ARF guanyl-nucleotide exchange factor activity;positive regulation of GTPase activity;cytoplasm	ko04144	Endocytosis	Cellular Processes	IQSEC2
ENSG00000010072	0.379645	yes	down	2.1285e-10	yes	chr1	+	231350501	231351500	exon	internal exon	NA	ENST00000391858	0.356433	yes	down	0.0377239	yes	GO:0003677;GO:0005654;GO:0005634;GO:0006281;GO:0009411;GO:0016607;GO:0031398;GO:0005694;GO:0070530;GO:0019985;GO:0070987;GO:0043130;GO:0046872;GO:0005515;GO:0006974	DNA binding;nucleoplasm;nucleus;DNA repair;response to UV;nuclear speck;positive regulation of protein ubiquitination;chromosome;K63-linked polyubiquitin binding;translesion synthesis;error-free translesion synthesis;ubiquitin binding;metal ion binding;protein binding;cellular response to DNA damage stimulus	.	.	.	SPRTN
ENSG00000264668	2.39644	yes	up	2.3391e-05	yes	chr8	+	143276001	143277000	downstream	NA	NA	ENST00000522452	0.351788	yes	down	0.0382927	yes	GO:0003676	nucleic acid binding	.	.	.	AC138696.1
ENSG00000169891	2.41791	yes	up	0.000441002	yes	chrX	+	16947001	16948000	intron	first intron	NA	ENST00000357277	2.47967	yes	up	0.0393653	yes	GO:0005737;GO:0061024;GO:0046872;GO:0005515;GO:0005509;GO:0005829;GO:0007173;GO:0006461	cytoplasm;membrane organization;metal ion binding;protein binding;calcium ion binding;cytosol;epidermal growth factor receptor signaling pathway;protein complex assembly	.	.	.	REPS2
ENSG00000080854	1.0747	yes	up	7.24993e-08	yes	chr11	-	133940001	133941000	promoter	Distal	ICP	ENST00000321016	2.52735	yes	up	0.0393868	yes	GO:0030425;GO:0007399;GO:0016020;GO:0030054;GO:0014069;GO:0043025;GO:0097151;GO:0007155;GO:0060077;GO:0007156;GO:0019900;GO:0016021;GO:0005886;GO:0045202;GO:0045211	dendrite;nervous system development;membrane;cell junction;postsynaptic density;neuronal cell body;positive regulation of inhibitory postsynaptic membrane potential;cell adhesion;inhibitory synapse;homophilic cell adhesion via plasma membrane adhesion molecules;kinase binding;integral component of membrane;plasma membrane;synapse;postsynaptic membrane	.	.	.	IGSF9B
ENSG00000183117	0.705234	yes	down	0.000166688	yes	chr8	-	3470501	3471500	promoter	Distal	LCP	ENST00000537824	0.348828	yes	down	0.0398011	yes	GO:0016020;GO:0001964;GO:0016021;GO:0042593	membrane;startle response;integral component of membrane;glucose homeostasis	.	.	.	CSMD1
ENSG00000120318	0.517787	yes	down	0.000190214	yes	chr5	-	141681501	141682500	exon	first exon	NA	ENST00000508305	0.351784	yes	down	0.0400442	yes	GO:0016020;GO:0042995;GO:0035021;GO:0043547;GO:0005737;GO:0016192;GO:0005515;GO:0005829;GO:0043325;GO:0005886;GO:0005856;GO:0007165;GO:0030336;GO:0008360;GO:0030027;GO:0001726;GO:0046872;GO:0005547;GO:0007010;GO:0035024;GO:0051056;GO:0005096	membrane;cell projection;negative regulation of Rac protein signal transduction;positive regulation of GTPase activity;cytoplasm;vesicle-mediated transport;protein binding;cytosol;phosphatidylinositol-3,4-bisphosphate binding;plasma membrane;cytoskeleton;signal transduction;negative regulation of cell migration;regulation of cell shape;lamellipodium;ruffle;metal ion binding;phosphatidylinositol-3…	ko04015;ko04144;ko04024	Rap1 signaling pathway;Endocytosis;cAMP signaling pathway	Environmental Information Processing;Cellular Processes;Environmental Information Processing	ARAP3
ENSG00000110436	0.272059	yes	down	3.64809e-09	yes	chr11	-	35284001	35285000	downstream	NA	NA	ENST00000278379	0.358304	yes	down	0.0407943	yes	GO:0070779;GO:0016020;GO:0046326;GO:0005515;GO:0005887;GO:0098656;GO:0015501;GO:0021537;GO:0009611;GO:0005313;GO:0042493;GO:0030673;GO:0035264;GO:0006865;GO:0030534;GO:0007399;GO:0010259;GO:0043200;GO:0009416;GO:0007632;GO:0015293;GO:0016021;GO:0015813;GO:0005886;GO:0070207;GO:0031668;GO:0030424;GO:0006810;GO:0055085;GO:0089711;GO:0098712;GO:0006811;GO:0009986;GO:0046872;GO:0007268;GO:0005314;GO:…	D-aspartate import;membrane;positive regulation of glucose import;protein binding;integral component of plasma membrane;anion transmembrane transport;glutamate:sodium symporter activity;telencephalon development;response to wounding;L-glutamate transmembrane transporter activity;response to drug;axolemma;multicellular organism growth;amino acid transport;adult behavior;nervous system development;…	ko04724;ko05014	Glutamatergic synapse;Amyotrophic lateral sclerosis (ALS)	Organismal Systems;Human Diseases	SLC1A2
ENSG00000142303	1.94256	yes	up	0.000131903	yes	chr19	-	8611501	8612500	promoter	Distal	LCP	ENST00000270328	0.36299	yes	down	0.0423179	yes	GO:0031012;GO:0004222;GO:0008233;GO:0005578;GO:0046872;GO:0005515;GO:0008237;GO:0016787;GO:0006508;GO:0001527;GO:0008270;GO:0005576	extracellular matrix;metalloendopeptidase activity;peptidase activity;proteinaceous extracellular matrix;metal ion binding;protein binding;metallopeptidase activity;hydrolase activity;proteolysis;microfibril;zinc ion binding;extracellular region	.	.	.	ADAMTS10
ENSG00000198901	0.529545	yes	down	8.16725e-05	yes	chr15	-	90982501	90983500	downstream	NA	NA	ENST00000361188	2.45594	yes	up	0.0431369	yes	GO:0000922;GO:0005874;GO:0005737;GO:0019901;GO:0030496;GO:0005515;GO:0005829;GO:0005819;GO:0005886;GO:0070938;GO:0005876;GO:0005856;GO:0005634;GO:0005654;GO:0000226;GO:0015630;GO:0000910;GO:0019894;GO:0008017;GO:0000022;GO:0051301;GO:0007049;GO:0001578;GO:0008284	spindle pole;microtubule;cytoplasm;protein kinase binding;midbody;protein binding;cytosol;spindle;plasma membrane;contractile ring;spindle microtubule;cytoskeleton;nucleus;nucleoplasm;microtubule cytoskeleton organization;microtubule cytoskeleton;cytokinesis;kinesin binding;microtubule binding;mitotic spindle elongation;cell division;cell cycle;microtubule bundle formation;positive regulation of …	.	.	.	PRC1
ENSG00000073737	0.576455	yes	down	9.20098e-06	yes	chr2	+	169079501	169080500	promoter	Intermediate	LCP	ENST00000357546	2.4764	yes	up	0.0440831	yes	GO:0016020;GO:0005783;GO:0031090;GO:0016854;GO:0047035;GO:0055114;GO:0042904;GO:0004745;GO:0016491;GO:0043231;GO:0042448;GO:0008209;GO:0002138;GO:0042572;GO:0004022;GO:0030176;GO:0005789;GO:0030855	membrane;endoplasmic reticulum;organelle membrane;racemase and epimerase activity;testosterone dehydrogenase (NAD+) activity;oxidation-reduction process;9-cis-retinoic acid biosynthetic process;retinol dehydrogenase activity;oxidoreductase activity;intracellular membrane-bounded organelle;progesterone metabolic process;androgen metabolic process;retinoic acid biosynthetic process;retinol metaboli…	ko00830	Retinol metabolism	Metabolism	DHRS9
ENSG00000047617	2.0155	yes	up	1.98778e-05	yes	chr12	-	5870501	5871500	promoter	Distal	LCP	ENST00000327087	2.48876	yes	up	0.0452241	yes	GO:0016020;GO:0006810;GO:0005654;GO:0034220;GO:0046982;GO:0034707;GO:0042803;GO:0006811;GO:0046983;GO:0005229;GO:0006821;GO:0016021;GO:0005254;GO:0005886;GO:1902476	membrane;transport;nucleoplasm;ion transmembrane transport;protein heterodimerization activity;chloride channel complex;protein homodimerization activity;ion transport;protein dimerization activity;intracellular calcium activated chloride channel activity;chloride transport;integral component of membrane;chloride channel activity;plasma membrane;chloride transmembrane transport	ko04740	Olfactory transduction	Organismal Systems	ANO2
ENSG00000144843	2.46094	yes	up	0.000134262	yes	chr3	+	119581001	119582000	promoter	Proximal	LCP	ENST00000478399	2.46807	yes	up	0.0458777	yes	GO:0051725;GO:0000287;GO:0003875;GO:0005622;GO:0030955;GO:0016787;GO:0005515;GO:0006464	protein de-ADP-ribosylation;magnesium ion binding;ADP-ribosylarginine hydrolase activity;intracellular;potassium ion binding;hydrolase activity;protein binding;cellular protein modification process	.	.	.	ADPRH
ENSG00000122126	1.57401	yes	up	0.000295143	yes	chrX	+	129553001	129554000	intron	internal intron	NA	ENST00000357121	2.40151	yes	up	0.0470959	yes	GO:0016020;GO:0048365;GO:0031410;GO:0006661;GO:0005737;GO:0060271;GO:0016787;GO:0005515;GO:0005769;GO:0052745;GO:0070062;GO:0007165;GO:0030136;GO:0030670;GO:0001750;GO:0005768;GO:0031901;GO:0004439;GO:0051056;GO:0006629;GO:0005929;GO:0042995;GO:0036092;GO:0043547;GO:0005795;GO:0005829;GO:0005798;GO:0005886;GO:0034596;GO:0005634;GO:0001701;GO:0030030;GO:0005802;GO:0061024;GO:0043087;GO:0052659;GO:…	membrane;Rac GTPase binding;cytoplasmic vesicle;phosphatidylinositol biosynthetic process;cytoplasm;cilium morphogenesis;hydrolase activity;protein binding;early endosome;inositol phosphate phosphatase activity;extracellular vesicular exosome;signal transduction;clathrin-coated vesicle;phagocytic vesicle membrane;photoreceptor outer segment;endosome;early endosome membrane;phosphatidylinositol-4,…	ko04070;ko00562	Phosphatidylinositol signaling system;Inositol phosphate metabolism	Environmental Information Processing;Metabolism	OCRL
ENSG00000006555	2.60843	yes	up	5.62882e-06	yes	chr1	-	54782501	54783500	downstream	NA	NA	ENST00000371276	0.371827	yes	down	0.051261	no	.	.	.	.	.	TTC22
ENSG00000170791	1.76721	yes	up	5.62753e-05	yes	chr8	+	56212501	56213500	downstream	NA	NA	ENST00000523975	0.377436	yes	down	0.0573546	no	GO:0005758;GO:0005739	mitochondrial intermembrane space;mitochondrion	.	.	.	CHCHD7
ENSG00000075340	2.01081	yes	up	3.38936e-06	yes	chr2	-	70678501	70679500	intron	internal intron	NA	ENST00000264436	0.384125	yes	down	0.0575034	no	GO:0051015;GO:0016020;GO:0031410;GO:0046982;GO:0050901;GO:0005737;GO:0008290;GO:0019901;GO:0032092;GO:0051017;GO:0005829;GO:0005516;GO:0030097;GO:0005886;GO:0030507;GO:0005856;GO:0055085;GO:0030036;GO:0050900;GO:0044853;GO:0051016;GO:0014069;GO:0042803;GO:0003779;GO:0005198;GO:0006461	actin filament binding;membrane;cytoplasmic vesicle;protein heterodimerization activity;leukocyte tethering or rolling;cytoplasm;F-actin capping protein complex;protein kinase binding;positive regulation of protein binding;actin filament bundle assembly;cytosol;calmodulin binding;hemopoiesis;plasma membrane;spectrin binding;cytoskeleton;transmembrane transport;actin cytoskeleton organization;leuk…	.	.	.	ADD2
ENSG00000176155	0.671642	yes	down	0.00031921	yes	chr17	-	82185501	82186500	downstream	NA	NA	ENST00000392347	0.387309	yes	down	0.0578361	no	GO:0005515	protein binding	.	.	.	CCDC57
ENSG00000143457	6.02564	yes	up	0.000168786	yes	chr1	-	150697001	150698000	promoter	Intermediate	LCP	ENST00000271732	2.28939	yes	up	0.0587463	no	GO:0016020;GO:0032580;GO:0007030;GO:0006890;GO:0005802;GO:0000139;GO:0050714;GO:0008289;GO:0032588;GO:0048194;GO:0043001;GO:0005515;GO:0005794;GO:0005829;GO:0070273;GO:0031985	membrane;Golgi cisterna membrane;Golgi organization;retrograde vesicle-mediated transport, Golgi to ER;trans-Golgi network;Golgi membrane;positive regulation of protein secretion;lipid binding;trans-Golgi network membrane;Golgi vesicle budding;Golgi to plasma membrane protein transport;protein binding;Golgi apparatus;cytosol;phosphatidylinositol-4-phosphate binding;Golgi cisterna	.	.	.	GOLPH3L
ENSG00000141469	1.76031	yes	up	1.71288e-07	yes	chr18	+	45727001	45728000	intron	first intron	NA	ENST00000586142	0.380975	yes	down	0.059169	no	GO:0006833;GO:0016323;GO:0043231;GO:0016020;GO:0006810;GO:0055085;GO:0015265;GO:0015204;GO:0005730;GO:0005887;GO:0016021;GO:0005372;GO:0015840;GO:0071918;GO:0005886	water transport;basolateral plasma membrane;intracellular membrane-bounded organelle;membrane;transport;transmembrane transport;urea channel activity;urea transmembrane transporter activity;nucleolus;integral component of plasma membrane;integral component of membrane;water transmembrane transporter activity;urea transport;urea transmembrane transport;plasma membrane	.	.	.	SLC14A1
ENSG00000152784	0.497821	yes	down	1.00202e-05	yes	chr4	+	80197001	80198000	intron	first intron	NA	ENST00000415738	2.34005	yes	up	0.05925	no	GO:0007399;GO:0003677;GO:0005634;GO:0006355;GO:0008168;GO:0006351;GO:0003676;GO:0046872;GO:0005515;GO:0014003;GO:0016740;GO:0032259	nervous system development;DNA binding;nucleus;regulation of transcription, DNA-templated;methyltransferase activity;transcription, DNA-templated;nucleic acid binding;metal ion binding;protein binding;oligodendrocyte development;transferase activity;methylation	.	.	.	PRDM8
ENSG00000171045	1.81667	yes	up	1.17024e-09	yes	chr8	-	142299501	142300500	exon	internal exon	NA	ENST00000519651	0.391965	yes	down	0.0601641	no	GO:0005484;GO:0000149;GO:0016020;GO:0016192;GO:0006886;GO:0012505;GO:0006906;GO:0048278;GO:0031201;GO:0016021	SNAP receptor activity;SNARE binding;membrane;vesicle-mediated transport;intracellular protein transport;endomembrane system;vesicle fusion;vesicle docking;SNARE complex;integral component of membrane	.	.	.	TSNARE1
ENSG00000225697	1.53991	yes	up	0.000184979	yes	chr3	-	48631501	48632500	intron	last intron	NA	ENST00000358747	2.29865	yes	up	0.060709	no	GO:0016323;GO:0016020;GO:0005783;GO:0015562;GO:0016324;GO:0031410;GO:0050892;GO:0031982;GO:0015106;GO:0071346;GO:0006821;GO:0005887;GO:0015724;GO:0015660;GO:0098656;GO:0015297;GO:1902476;GO:0015499;GO:0008272;GO:0070633;GO:0015701;GO:0015797;GO:0019531;GO:0048240;GO:2001150;GO:0051454;GO:0030321;GO:0005452;GO:0031526;GO:0071320;GO:0012506;GO:0042045;GO:0015301;GO:0015116;GO:1902358;GO:0016021;GO:…	basolateral plasma membrane;membrane;endoplasmic reticulum;efflux transmembrane transporter activity;apical plasma membrane;cytoplasmic vesicle;intestinal absorption;vesicle;bicarbonate transmembrane transporter activity;cellular response to interferon-gamma;chloride transport;integral component of plasma membrane;formate transport;formate efflux transmembrane transporter activity;anion transmemb…	ko04978	Mineral absorption	Organismal Systems	SLC26A6
ENSG00000085831	0.654192	yes	down	0.00101568	yes	chr1	-	51285001	51286000	downstream	NA	NA	ENST00000447632	0.389132	yes	down	0.0638042	no	.	.	.	.	.	TTC39A
ENSG00000183092	1.60893	yes	up	0.000198065	yes	chr14	-	100571001	100572000	promoter	Distal	LCP	ENST00000556751	2.31001	yes	up	0.0645626	no	GO:0016020;GO:0005515;GO:0005737	membrane;protein binding;cytoplasm	.	.	.	BEGAIN
ENSG00000123600	0.614322	yes	down	2.42164e-05	yes	chr2	-	171436001	171437000	promoter	Distal	ICP	ENST00000375258	0.400223	yes	down	0.0674511	no	GO:0005634;GO:0004402;GO:0008168;GO:0016573;GO:0005737;GO:0045444;GO:0016740;GO:0007519;GO:0032259	nucleus;histone acetyltransferase activity;methyltransferase activity;histone acetylation;cytoplasm;fat cell differentiation;transferase activity;skeletal muscle tissue development;methylation	.	.	.	METTL8
ENSG00000127329	1.80073	yes	up	2.50498e-05	yes	chr12	-	70542001	70543000	promoter	Distal	LCP	ENST00000334414	0.394224	yes	down	0.0684615	no	GO:0016020;GO:0035335;GO:0016791;GO:0043235;GO:0005887;GO:0005515;GO:0016787;GO:0004721;GO:0043312;GO:0016021;GO:0006470;GO:0016311;GO:0006796;GO:0070821;GO:0005886;GO:0001525;GO:0005001;GO:0004725;GO:0035579	membrane;peptidyl-tyrosine dephosphorylation;phosphatase activity;receptor complex;integral component of plasma membrane;protein binding;hydrolase activity;phosphoprotein phosphatase activity;neutrophil degranulation;integral component of membrane;protein dephosphorylation;dephosphorylation;phosphate-containing compound metabolic process;tertiary granule membrane;plasma membrane;angiogenesis;tran…	ko04520	Adherens junction	Cellular Processes	PTPRB
ENSG00000143344	1.43039	yes	up	0.000371759	yes	chr1	+	183916501	183917500	intron	internal intron	NA	ENST00000304685	0.394967	yes	down	0.0708627	no	GO:0007165;GO:0005829;GO:0008321;GO:0007264;GO:0019216;GO:0005085;GO:0043547	signal transduction;cytosol;Ral guanyl-nucleotide exchange factor activity;small GTPase mediated signal transduction;regulation of lipid metabolic process;guanyl-nucleotide exchange factor activity;positive regulation of GTPase activity	ko04014	Ras signaling pathway	Environmental Information Processing	RGL1
ENSG00000111110	1.67035	yes	up	2.30314e-05	yes	chr12	-	62789001	62790000	promoter	Distal	LCP	ENST00000228705	0.405298	yes	down	0.0712088	no	GO:0005654;GO:0005634;GO:0003824;GO:0004722;GO:0005737;GO:0016787;GO:0004721;GO:0006470	nucleoplasm;nucleus;catalytic activity;protein serine/threonine phosphatase activity;cytoplasm;hydrolase activity;phosphoprotein phosphatase activity;protein dephosphorylation	.	.	.	PPM1H
ENSG00000133739	1.65306	yes	up	0.000204513	yes	chr8	+	85145001	85146000	exon	last exon	NA	ENST00000414626	0.407462	yes	down	0.0713892	no	GO:0005814;GO:0005856;GO:0051301;GO:0005813;GO:0007049;GO:0005737	centriole;cytoskeleton;cell division;centrosome;cell cycle;cytoplasm	.	.	.	LRRCC1
ENSG00000133131	1.65551	yes	up	0.000802047	yes	chrX	-	106999501	107000500	promoter	Intermediate	ICP	ENST00000355610	0.407385	yes	down	0.071573	no	GO:0005654;GO:0046872;GO:0005634;GO:0005515;GO:0008270	nucleoplasm;metal ion binding;nucleus;protein binding;zinc ion binding	.	.	.	MORC4
ENSG00000172456	1.46589	yes	up	0.000511633	yes	chr1	+	59297001	59298000	intron	first intron	NA	ENST00000413489	2.24734	yes	up	0.0715955	no	GO:0016310;GO:0016301;GO:0016773;GO:0046835;GO:0019150;GO:0005623;GO:0070050;GO:0005975;GO:0016740;GO:0019321	phosphorylation;kinase activity;phosphotransferase activity, alcohol group as acceptor;carbohydrate phosphorylation;D-ribulokinase activity;cell;neuron cellular homeostasis;carbohydrate metabolic process;transferase activity;pentose metabolic process	.	.	.	FGGY
ENSG00000000971	1.41006	yes	up	0.000226063	yes	chr1	+	196675001	196676000	exon	internal exon	NA	ENST00000367429	0.401371	yes	down	0.072898	no	GO:0070062;GO:0006956;GO:0005615;GO:0072562;GO:0030449;GO:0006957;GO:0043395;GO:0005515;GO:0002376;GO:0008201;GO:0005576;GO:0045087	extracellular vesicular exosome;complement activation;extracellular space;blood microparticle;regulation of complement activation;complement activation, alternative pathway;heparan sulfate proteoglycan binding;protein binding;immune system process;heparin binding;extracellular region;innate immune response	ko05150;ko04610	Staphylococcus aureus infection;Complement and coagulation cascades	Human Diseases;Organismal Systems	CFH
ENSG00000131381	1.75862	yes	up	0.000166792	yes	chr3	-	15094501	15095500	downstream	NA	NA	ENST00000476527	0.408885	yes	down	0.0730774	no	GO:0010008;GO:0016020;GO:1903358;GO:0007596;GO:0090160;GO:0006895;GO:0005515;GO:0005829;GO:0000011;GO:0006897;GO:0008270;GO:0017137;GO:0015031;GO:0005886;GO:0006810;GO:0043231;GO:0070062;GO:0016197;GO:0034498;GO:0010009;GO:0003676;GO:0005768;GO:0046872;GO:0031901;GO:0034058	endosome membrane;membrane;regulation of Golgi organization;blood coagulation;Golgi to lysosome transport;Golgi to endosome transport;protein binding;cytosol;vacuole inheritance;endocytosis;zinc ion binding;Rab GTPase binding;protein transport;plasma membrane;transport;intracellular membrane-bounded organelle;extracellular vesicular exosome;endosomal transport;early endosome to Golgi transport;cy…	ko04144	Endocytosis	Cellular Processes	RBSN
ENSG00000165121	2.01277	yes	up	0.000172103	yes	chr9	+	85837501	85838500	intron	internal intron	NA	ENST00000431724	0.408763	yes	down	0.0732858	no	.	.	.	.	.	AL353743.1
ENSG00000148143	0.612654	yes	down	0.000432472	yes	chr9	+	106973501	106974500	intron	internal intron	NA	ENST00000277225	2.20867	yes	up	0.0738694	no	GO:0003677;GO:0005634;GO:0006355;GO:0006351;GO:0003676;GO:0046872;GO:0043392;GO:0005515;GO:0045944;GO:0006325	DNA binding;nucleus;regulation of transcription, DNA-templated;transcription, DNA-templated;nucleic acid binding;metal ion binding;negative regulation of DNA binding;protein binding;positive regulation of transcription from RNA polymerase II promoter;chromatin organization	.	.	.	ZNF462
ENSG00000176658	1.4816	yes	up	0.00010673	yes	chr17	-	32684001	32685000	exon	first exon	NA	ENST00000318217	2.16491	yes	up	0.0745743	no	GO:0005790;GO:0016323;GO:0051015;GO:0061502;GO:0005903;GO:0005524;GO:0031410;GO:0003774;GO:0043025;GO:0005829;GO:0000166;GO:0010923;GO:0048306;GO:0005516;GO:0051641;GO:0030424;GO:0070062;GO:0044853;GO:0043209;GO:0030673;GO:0097440;GO:0043005;GO:0005768;GO:0003779;GO:0030900;GO:0019904;GO:0016459;GO:0000146;GO:0030898	smooth endoplasmic reticulum;basolateral plasma membrane;actin filament binding;early endosome to recycling endosome transport;brush border;ATP binding;cytoplasmic vesicle;motor activity;neuronal cell body;cytosol;nucleotide binding;negative regulation of phosphatase activity;calcium-dependent protein binding;calmodulin binding;cellular localization;axon;extracellular vesicular exosome;plasma mem…	.	.	.	MYO1D
ENSG00000122035	1.58801	yes	up	1.16672e-06	yes	chr13	+	27268501	27269500	promoter	Distal	ICP	ENST00000241463	0.401282	yes	down	0.0757544	no	GO:0016020;GO:0005634;GO:0007165;GO:0006355;GO:0006351;GO:0003924;GO:0005730;GO:0000166;GO:0045943;GO:0005525	membrane;nucleus;signal transduction;regulation of transcription, DNA-templated;transcription, DNA-templated;GTPase activity;nucleolus;nucleotide binding;positive regulation of transcription from RNA polymerase I promoter;GTP binding	.	.	.	RASL11A
ENSG00000137812	1.67918	yes	up	2.34113e-06	yes	chr15	+	40661501	40662500	exon	internal exon	NA	ENST00000399668	2.15403	yes	up	0.0759906	no	GO:0007059;GO:0071173;GO:0001675;GO:0034501;GO:0005515;GO:0005829;GO:0016604;GO:0010923;GO:0000777;GO:0070062;GO:0005634;GO:0005654;GO:0001669;GO:0005694;GO:0000775;GO:0008608;GO:0007062;GO:0051301;GO:0000776;GO:0034080;GO:0007049	chromosome segregation;spindle assembly checkpoint;acrosome assembly;protein localization to kinetochore;protein binding;cytosol;nuclear body;negative regulation of phosphatase activity;condensed chromosome kinetochore;extracellular vesicular exosome;nucleus;nucleoplasm;acrosomal vesicle;chromosome;chromosome, centromeric region;attachment of spindle microtubules to kinetochore;sister chromatid c…	.	.	.	KNL1
ENSG00000157796	1.47437	yes	up	2.10075e-05	yes	chr4	+	39180501	39181500	promoter	Intermediate	ICP	ENST00000506503	0.403023	yes	down	0.0767053	no	GO:0005929;GO:0042995;GO:0061055;GO:0005737;GO:0035721;GO:0008406;GO:0055123;GO:0060271;GO:0097542;GO:0031514;GO:0035735;GO:0007224;GO:0050877;GO:0005856;GO:0000902;GO:0060831;GO:0005654;GO:0032391;GO:0031076;GO:0030030;GO:0001701;GO:0060830;GO:0001750;GO:0030326;GO:0042471;GO:0048701;GO:0030991	cilium;cell projection;myotome development;cytoplasm;intraciliary retrograde transport;gonad development;digestive system development;cilium morphogenesis;ciliary tip;motile cilium;intraciliary transport involved in cilium morphogenesis;smoothened signaling pathway;neurological system process;cytoskeleton;cell morphogenesis;smoothened signaling pathway involved in dorsal/ventral neural tube patte…	.	.	.	WDR19
ENSG00000147180	3.43103	yes	up	1.56951e-06	yes	chrX	+	85268001	85269000	intron	internal intron	NA	ENST00000360700	0.403601	yes	down	0.0771775	no	GO:0070062;GO:0003677;GO:0046872;GO:0005634;GO:0005515;GO:0006355;GO:0043565;GO:0006351;GO:0045893;GO:0003676	extracellular vesicular exosome;DNA binding;metal ion binding;nucleus;protein binding;regulation of transcription, DNA-templated;sequence-specific DNA binding;transcription, DNA-templated;positive regulation of transcription, DNA-templated;nucleic acid binding	.	.	.	ZNF711
ENSG00000133424	1.96633	yes	up	1.68933e-05	yes	chr22	-	33873001	33874000	promoter	Intermediate	LCP	ENST00000354992	0.409875	yes	down	0.0774861	no	GO:0008375;GO:0016020;GO:0006486;GO:0043403;GO:0009101;GO:0000139;GO:0035252;GO:0030173;GO:0016021;GO:0060538;GO:0030145;GO:0043231;GO:0006688;GO:0006044;GO:0008152;GO:0015020;GO:0042285;GO:0003824;GO:0046716;GO:0046872;GO:0035269;GO:0016757;GO:0005794;GO:0006493;GO:0016740	acetylglucosaminyltransferase activity;membrane;protein glycosylation;skeletal muscle tissue regeneration;glycoprotein biosynthetic process;Golgi membrane;UDP-xylosyltransferase activity;integral component of Golgi membrane;integral component of membrane;skeletal muscle organ development;manganese ion binding;intracellular membrane-bounded organelle;glycosphingolipid biosynthetic process;N-acetyl…	ko00515	Mannose type O-glycan biosynthesis	Metabolism	LARGE1
ENSG00000010704	0.602782	yes	down	0.000690537	yes	chr6	+	26092001	26093000	intron	first intron	NA	ENST00000357618	2.16198	yes	up	0.077835	no	GO:0042446;GO:2000273;GO:0006879;GO:0016020;GO:0005615;GO:0097421;GO:0009897;GO:0031410;GO:1990357;GO:0005102;GO:0032092;GO:2000008;GO:0055072;GO:0005887;GO:0005515;GO:0090277;GO:0055037;GO:0005769;GO:0002725;GO:0007565;GO:0002626;GO:0010039;GO:0030509;GO:0010628;GO:0048471;GO:2000059;GO:0045177;GO:1990459;GO:0006461;GO:0010862;GO:2000272;GO:0016021;GO:0033572;GO:0005886;GO:0010106;GO:1900121;GO:…	hormone biosynthetic process;positive regulation of receptor activity;cellular iron ion homeostasis;membrane;extracellular space;liver regeneration;external side of plasma membrane;cytoplasmic vesicle;terminal web;receptor binding;positive regulation of protein binding;regulation of protein localization to cell surface;iron ion homeostasis;integral component of plasma membrane;protein binding;pos…	.	.	.	HFE
ENSG00000124120	1.58434	yes	up	0.000677139	yes	chr20	+	44479001	44480000	exon	internal exon	NA	ENST00000262605	2.21361	yes	up	0.0789458	no	GO:0016020;GO:0006810;GO:0005622;GO:0005215	membrane;transport;intracellular;transporter activity	.	.	.	TTPAL
ENSG00000186866	1.67302	yes	up	5.86886e-06	yes	chr21	-	45289501	45290500	promoter	Distal	ICP	ENST00000471540	0.404016	yes	down	0.0791871	no	GO:0010468;GO:0008417;GO:0006486;GO:0005783;GO:0010717;GO:0036065;GO:0046922;GO:0001707;GO:0051046;GO:0016757;GO:0005794;GO:0005975;GO:0036066;GO:0016740;GO:0005789;GO:0006004	regulation of gene expression;fucosyltransferase activity;protein glycosylation;endoplasmic reticulum;regulation of epithelial to mesenchymal transition;fucosylation;peptide-O-fucosyltransferase activity;mesoderm formation;regulation of secretion;transferase activity, transferring glycosyl groups;Golgi apparatus;carbohydrate metabolic process;protein O-linked fucosylation;transferase activity;end…	ko00514	Other types of O-glycan biosynthesis	Metabolism	POFUT2
ENSG00000130396	1.23007	yes	up	1.46439e-05	yes	chr6	+	167962001	167963000	intron	internal intron	NA	ENST00000423229	2.16942	yes	up	0.0800578	no	GO:0030054;GO:0043547;GO:0005737;GO:0021987;GO:0005913;GO:0005515;GO:0005911;GO:0005829;GO:0070445;GO:0043296;GO:0005886;GO:0048872;GO:0021537;GO:0050839;GO:0005654;GO:0090557;GO:0007165;GO:0048854;GO:0016607;GO:0007267;GO:0060019;GO:0017016;GO:0005912;GO:0045296;GO:0007155;GO:0034332;GO:1902414;GO:0008022;GO:0034334;GO:0032880;GO:0045177;GO:0060563	cell junction;positive regulation of GTPase activity;cytoplasm;cerebral cortex development;cell-cell adherens junction;protein binding;cell-cell junction;cytosol;regulation of oligodendrocyte progenitor proliferation;apical junction complex;plasma membrane;homeostasis of number of cells;telencephalon development;cell adhesion molecule binding;nucleoplasm;establishment of endothelial intestinal ba…	ko04015;ko04024;ko04670;ko04530;ko04014;ko04520	Rap1 signaling pathway;cAMP signaling pathway;Leukocyte transendothelial migration;Tight junction;Ras signaling pathway;Adherens junction	Environmental Information Processing;Environmental Information Processing;Organismal Systems;Cellular Processes;Environmental Information Processing;Cellular Processes	AFDN
ENSG00000225697	1.53991	yes	up	0.000184979	yes	chr3	-	48631501	48632500	intron	last intron	NA	ENST00000420764	2.16436	yes	up	0.0806815	no	GO:0016323;GO:0016020;GO:0005783;GO:0015562;GO:0016324;GO:0031410;GO:0050892;GO:0031982;GO:0015106;GO:0071346;GO:0006821;GO:0005887;GO:0015724;GO:0015660;GO:0098656;GO:0015297;GO:1902476;GO:0015499;GO:0008272;GO:0070633;GO:0015701;GO:0015797;GO:0019531;GO:0048240;GO:2001150;GO:0051454;GO:0030321;GO:0005452;GO:0031526;GO:0071320;GO:0012506;GO:0042045;GO:0015301;GO:0015116;GO:1902358;GO:0016021;GO:…	basolateral plasma membrane;membrane;endoplasmic reticulum;efflux transmembrane transporter activity;apical plasma membrane;cytoplasmic vesicle;intestinal absorption;vesicle;bicarbonate transmembrane transporter activity;cellular response to interferon-gamma;chloride transport;integral component of plasma membrane;formate transport;formate efflux transmembrane transporter activity;anion transmemb…	ko04978	Mineral absorption	Organismal Systems	SLC26A6
ENSG00000180626	0.565432	yes	down	0.000373455	yes	chr17	-	5183501	5184500	intron	first intron	NA	ENST00000399604	2.17628	yes	up	0.080723	no	GO:0003677;GO:0046872;GO:0005634;GO:0006355;GO:0006351;GO:0003676	DNA binding;metal ion binding;nucleus;regulation of transcription, DNA-templated;transcription, DNA-templated;nucleic acid binding	.	.	.	ZNF594
ENSG00000214944	3.05357	yes	up	0.000193311	yes	chr5	+	73882001	73883000	intron	internal intron	NA	ENST00000545377	0.416209	yes	down	0.0829663	no	GO:0016020;GO:0003723;GO:0030154;GO:0048013;GO:0005085;GO:0043547;GO:0035556;GO:0005737;GO:0046872;GO:0005829;GO:0035023;GO:0005886;GO:0005089	membrane;RNA binding;cell differentiation;ephrin receptor signaling pathway;guanyl-nucleotide exchange factor activity;positive regulation of GTPase activity;intracellular signal transduction;cytoplasm;metal ion binding;cytosol;regulation of Rho protein signal transduction;plasma membrane;Rho guanyl-nucleotide exchange factor activity	.	.	.	ARHGEF28
ENSG00000143498	0.438931	yes	down	0.000732955	yes	chr1	-	222564001	222565000	intron	last intron	NA	ENST00000352967	2.18331	yes	up	0.08474	no	GO:0006363;GO:0043231;GO:0045815;GO:0005654;GO:0003677;GO:0005634;GO:0006361;GO:0015630;GO:0006355;GO:0006360;GO:0006351;GO:0006366;GO:0006362;GO:0005515;GO:0000120	termination of RNA polymerase I transcription;intracellular membrane-bounded organelle;positive regulation of gene expression, epigenetic;nucleoplasm;DNA binding;nucleus;transcription initiation from RNA polymerase I promoter;microtubule cytoskeleton;regulation of transcription, DNA-templated;transcription from RNA polymerase I promoter;transcription, DNA-templated;transcription from RNA polymera…	.	.	.	TAF1A
ENSG00000132640	8.63682	yes	up	3.14379e-15	yes	chr20	+	11890501	11891500	intron	first intron	NA	ENST00000254977	2.16622	yes	up	0.0856513	no	GO:0007399;GO:0005634;GO:0031625;GO:0042787;GO:0005737;GO:0048813;GO:0019005;GO:0043161;GO:0021987;GO:0005829;GO:0030162	nervous system development;nucleus;ubiquitin protein ligase binding;protein ubiquitination involved in ubiquitin-dependent protein catabolic process;cytoplasm;dendrite morphogenesis;SCF ubiquitin ligase complex;proteasome-mediated ubiquitin-dependent protein catabolic process;cerebral cortex development;cytosol;regulation of proteolysis	.	.	.	BTBD3
ENSG00000100580	0.534314	yes	down	6.60375e-05	yes	chr14	-	77351501	77352500	intron	first intron	NA	ENST00000216468	2.08352	yes	up	0.0859313	no	GO:0006810;GO:0016021	transport;integral component of membrane	.	.	.	TMED8
ENSG00000178175	1.25188	yes	up	0.000565128	yes	chr5	-	72460501	72461500	exon	last exon	NA	ENST00000318442	2.11847	yes	up	0.0882027	no	GO:0030331;GO:0003677;GO:0005634;GO:0003714;GO:0006355;GO:0006351;GO:0043627;GO:0003676;GO:0000122;GO:0046872;GO:0005515;GO:0033147	estrogen receptor binding;DNA binding;nucleus;transcription corepressor activity;regulation of transcription, DNA-templated;transcription, DNA-templated;response to estrogen;nucleic acid binding;negative regulation of transcription from RNA polymerase II promoter;metal ion binding;protein binding;negative regulation of intracellular estrogen receptor signaling pathway	.	.	.	ZNF366
ENSG00000255330	0.431373	yes	down	6.38683e-05	yes	chr6	-	127513001	127514000	intron	internal intron	NA	ENST00000481848	0.416416	yes	down	0.0885039	no	GO:0016020;GO:0005615;GO:0016021;GO:0010506	membrane;extracellular space;integral component of membrane;regulation of autophagy	.	.	.	SOGA3
ENSG00000105426	2.75061	yes	up	1.8591e-06	yes	chr19	-	5231501	5232500	intron	internal intron	NA	ENST00000588552	0.422357	yes	down	0.088658	no	GO:0016020;GO:0035374;GO:0021766;GO:0031410;GO:0030054;GO:0016791;GO:0021987;GO:0005887;GO:0005515;GO:0016787;GO:0004721;GO:0032687;GO:0008201;GO:0022038;GO:0070062;GO:0014069;GO:0043005;GO:0007155;GO:0042995;GO:0035335;GO:0021510;GO:0034164;GO:0043395;GO:0010977;GO:0030517;GO:0030672;GO:0006470;GO:0016021;GO:0016311;GO:0005886;GO:0045202;GO:0045211;GO:0048671;GO:0021549;GO:0030424;GO:0090557;GO:…	membrane;chondroitin sulfate binding;hippocampus development;cytoplasmic vesicle;cell junction;phosphatase activity;cerebral cortex development;integral component of plasma membrane;protein binding;hydrolase activity;phosphoprotein phosphatase activity;negative regulation of interferon-alpha production;heparin binding;corpus callosum development;extracellular vesicular exosome;postsynaptic densit…	.	.	.	PTPRS
ENSG00000152582	1.43337	yes	up	0.000482114	yes	chr5	+	35759501	35760500	intron	internal intron	NA	ENST00000503074	2.0996	yes	up	0.0899982	no	GO:0003676	nucleic acid binding	.	.	.	SPEF2
ENSG00000119661	1.92781	yes	up	1.17811e-05	yes	chr14	+	73699001	73700000	exon	last exon	NA	ENST00000553645	0.426784	yes	down	0.0901501	no	GO:0036157;GO:0043014;GO:0036158;GO:0045504	outer dynein arm;alpha-tubulin binding;outer dynein arm assembly;dynein heavy chain binding	ko05016	Huntington's disease	Human Diseases	DNAL1
ENSG00000153885	0.65747	yes	down	0.000353781	yes	chr19	+	33811501	33812500	downstream	NA	NA	ENST00000589786	2.16913	yes	up	0.090395	no	GO:0005515;GO:0042802;GO:0007275;GO:0051260	protein binding;identical protein binding;multicellular organismal development;protein homooligomerization	.	.	.	KCTD15
ENSG00000142303	1.94256	yes	up	0.000131903	yes	chr19	-	8611501	8612500	promoter	Distal	LCP	ENST00000597188	0.429223	yes	down	0.0916117	no	GO:0031012;GO:0004222;GO:0008233;GO:0005578;GO:0046872;GO:0005515;GO:0008237;GO:0016787;GO:0006508;GO:0001527;GO:0008270;GO:0005576	extracellular matrix;metalloendopeptidase activity;peptidase activity;proteinaceous extracellular matrix;metal ion binding;protein binding;metallopeptidase activity;hydrolase activity;proteolysis;microfibril;zinc ion binding;extracellular region	.	.	.	ADAMTS10
ENSG00000168062	1.93354	yes	up	2.676e-05	yes	chr11	-	64986001	64987000	downstream	NA	NA	ENST00000301887	2.08954	yes	up	0.0947043	no	GO:0003677;GO:0005634;GO:0042832;GO:0030154;GO:0006355;GO:0006351;GO:0006357;GO:0005515;GO:0043011;GO:0003700	DNA binding;nucleus;defense response to protozoan;cell differentiation;regulation of transcription, DNA-templated;transcription, DNA-templated;regulation of transcription from RNA polymerase II promoter;protein binding;myeloid dendritic cell differentiation;sequence-specific DNA binding transcription factor activity	.	.	.	BATF2
ENSG00000035499	2.46073	yes	up	0.000321442	yes	chr5	-	60647001	60648000	intron	last intron	NA	ENST00000265036	2.10859	yes	up	0.0951415	no	GO:0030177;GO:0016477;GO:0007165;GO:0005829;GO:0043547;GO:0035556;GO:0051056;GO:0005096	positive regulation of Wnt signaling pathway;cell migration;signal transduction;cytosol;positive regulation of GTPase activity;intracellular signal transduction;regulation of small GTPase mediated signal transduction;GTPase activator activity	.	.	.	DEPDC1B
ENSG00000183762	1.40307	yes	up	5.23489e-06	yes	chr22	+	29094001	29095000	intron	internal intron	NA	ENST00000400335	2.12596	yes	up	0.0956161	no	GO:0016020;GO:0007154;GO:0006915;GO:0090090;GO:0060828;GO:0030279;GO:0060173;GO:0005515;GO:0016021;GO:0016055;GO:0005886	membrane;cell communication;apoptotic process;negative regulation of canonical Wnt signaling pathway;regulation of canonical Wnt signaling pathway;negative regulation of ossification;limb development;protein binding;integral component of membrane;Wnt signaling pathway;plasma membrane	.	.	.	KREMEN1
ENSG00000075618	1.42403	yes	up	7.31435e-05	yes	chr7	+	5604501	5605500	exon	last exon	NA	ENST00000382361	2.0628	yes	up	0.0959677	no	GO:0051015;GO:0016477;GO:0071437;GO:0030054;GO:0032956;GO:0005737;GO:0030426;GO:0007015;GO:0005515;GO:0005911;GO:0051017;GO:0070062;GO:0005856;GO:0009653;GO:0030036;GO:0043209;GO:0030027;GO:0045296;GO:0030175;GO:0001725;GO:0010592;GO:0035089;GO:0044393;GO:0031941;GO:0003723;GO:0042995;GO:0007043;GO:0071803;GO:0030674;GO:0032534;GO:0008283;GO:0048870;GO:0005829;GO:0002102;GO:0008144;GO:0015629;GO:…	actin filament binding;cell migration;invadopodium;cell junction;regulation of actin cytoskeleton organization;cytoplasm;growth cone;actin filament organization;protein binding;cell-cell junction;actin filament bundle assembly;extracellular vesicular exosome;cytoskeleton;anatomical structure morphogenesis;actin cytoskeleton organization;myelin sheath;lamellipodium;cadherin binding;filopodium;stre…	ko05206	MicroRNAs in cancer	Human Diseases	FSCN1
ENSG00000068097	2.15642	yes	up	9.2849e-05	yes	chr17	-	60043501	60044500	intron	last intron	NA	ENST00000184956	0.439722	yes	down	0.0961607	no	GO:0003723	RNA binding	.	.	.	HEATR6
ENSG00000171408	1.36969	yes	up	0.00103664	yes	chr6	+	136187001	136188000	intron	last intron	NA	ENST00000308191	0.426769	yes	down	0.0974447	no	GO:0004114;GO:0007165;GO:0046872;GO:0006198;GO:0016787;GO:0008081;GO:0005829;GO:0007268;GO:0004115	3',5'-cyclic-nucleotide phosphodiesterase activity;signal transduction;metal ion binding;cAMP catabolic process;hydrolase activity;phosphoric diester hydrolase activity;cytosol;synaptic transmission;3',5'-cyclic-AMP phosphodiesterase activity	ko00230;ko05032	Purine metabolism;Morphine addiction	Metabolism;Human Diseases	PDE7B
ENSG00000196526	1.18585	yes	up	0.00014501	yes	chr4	-	7789001	7790000	intron	first intron	NA	ENST00000358461	2.03786	yes	up	0.0978199	no	GO:0005856;GO:0005925;GO:0005737;GO:0003779;GO:0005829;GO:0051493;GO:0015629;GO:0009966	cytoskeleton;focal adhesion;cytoplasm;actin binding;cytosol;regulation of cytoskeleton organization;actin cytoskeleton;regulation of signal transduction	.	.	.	AFAP1
ENSG00000100802	0.417544	yes	down	0.000686746	yes	chr14	-	22986501	22987500	exon	last exon	NA	ENST00000397382	0.432706	yes	down	0.104066	no	GO:0003723;GO:0005515;GO:0005576	RNA binding;protein binding;extracellular region	.	.	.	C14orf93
ENSG00000103647	0.390909	yes	down	4.01188e-06	yes	chr15	+	68577501	68578500	promoter	Distal	HCP	ENST00000543950	0.430882	yes	down	0.104726	no	GO:0005856;GO:0003779;GO:0051015;GO:0016020;GO:0005515;GO:0030036;GO:0015629;GO:0005737	cytoskeleton;actin binding;actin filament binding;membrane;protein binding;actin cytoskeleton organization;actin cytoskeleton;cytoplasm	.	.	.	CORO2B
ENSG00000152784	0.497821	yes	down	1.00202e-05	yes	chr4	+	80197001	80198000	intron	first intron	NA	ENST00000339711	0.44234	yes	down	0.10759	no	GO:0007399;GO:0003677;GO:0005634;GO:0006355;GO:0008168;GO:0006351;GO:0003676;GO:0046872;GO:0005515;GO:0014003;GO:0016740;GO:0032259	nervous system development;DNA binding;nucleus;regulation of transcription, DNA-templated;methyltransferase activity;transcription, DNA-templated;nucleic acid binding;metal ion binding;protein binding;oligodendrocyte development;transferase activity;methylation	.	.	.	PRDM8
ENSG00000111249	1.71223	yes	up	0.000420255	yes	chr12	+	111306501	111307500	intron	internal intron	NA	ENST00000261726	0.440054	yes	down	0.109726	no	GO:0003677;GO:0006355;GO:0051965;GO:0000139;GO:0071310;GO:0000122;GO:0048193;GO:0043565;GO:0007614;GO:0070062;GO:0045892;GO:0005634;GO:0000978;GO:0050775;GO:0006351;GO:0010628;GO:2000463;GO:0001078;GO:0050890;GO:0000977;GO:0007275;GO:0061003	DNA binding;regulation of transcription, DNA-templated;positive regulation of synapse assembly;Golgi membrane;cellular response to organic substance;negative regulation of transcription from RNA polymerase II promoter;Golgi vesicle transport;sequence-specific DNA binding;short-term memory;extracellular vesicular exosome;negative regulation of transcription, DNA-templated;nucleus;RNA polymerase II…	.	.	.	CUX2
ENSG00000088325	1.70294	yes	up	0.000489784	yes	chr20	+	31759501	31760500	intron	internal intron	NA	ENST00000300403	1.98755	no	up	0.110795	no	GO:0000278;GO:0000922;GO:0005524;GO:0005874;GO:0005737;GO:0019901;GO:0008283;GO:0005515;GO:0005829;GO:0060236;GO:0005819;GO:0005856;GO:0072686;GO:0005634;GO:0005654;GO:0043203;GO:0015630;GO:0032147;GO:0006915;GO:1901796;GO:0010389;GO:0090307;GO:0051301;GO:0005525;GO:0007049	mitotic cell cycle;spindle pole;ATP binding;microtubule;cytoplasm;protein kinase binding;cell proliferation;protein binding;cytosol;regulation of mitotic spindle organization;spindle;cytoskeleton;mitotic spindle;nucleus;nucleoplasm;axon hillock;microtubule cytoskeleton;activation of protein kinase activity;apoptotic process;regulation of signal transduction by p53 class mediator;regulation of G2/…	.	.	.	TPX2
ENSG00000115827	0.167883	yes	down	5.09654e-06	yes	chr2	+	171433501	171434500	exon	first exon	NA	ENST00000468592	0.451027	yes	down	0.113524	no	GO:0080008;GO:0043687;GO:0016020;GO:0005654;GO:0005634;GO:0016567;GO:0005730;GO:0005829;GO:0016021	Cul4-RING E3 ubiquitin ligase complex;post-translational protein modification;membrane;nucleoplasm;nucleus;protein ubiquitination;nucleolus;cytosol;integral component of membrane	.	.	.	DCAF17
ENSG00000115414	1.92252	yes	up	5.11488e-13	yes	chr2	-	215428001	215429000	intron	internal intron	NA	ENST00000421182	1.99912	no	up	0.114445	no	GO:0043687;GO:0005615;GO:0016324;GO:0005102;GO:0033622;GO:0016504;GO:0018149;GO:0044267;GO:0002576;GO:0005178;GO:0005515;GO:0008201;GO:0005604;GO:0005605;GO:0009611;GO:0070062;GO:0034446;GO:0001525;GO:0070372;GO:0042802;GO:0048146;GO:0010628;GO:0008360;GO:0007160;GO:0022617;GO:0007155;GO:0008022;GO:0051702;GO:0005518;GO:0030198;GO:0005788;GO:0007044;GO:0005577;GO:0035987;GO:0051087;GO:0045773;GO:…	post-translational protein modification;extracellular space;apical plasma membrane;receptor binding;integrin activation;peptidase activator activity;peptide cross-linking;cellular protein metabolic process;platelet degranulation;integrin binding;protein binding;heparin binding;basement membrane;basal lamina;response to wounding;extracellular vesicular exosome;substrate adhesion-dependent cell spr…	ko05146;ko04810;ko05100;ko05165;ko04512;ko05200;ko05222;ko04933;ko05205;ko04151;ko04510	Amoebiasis;Regulation of actin cytoskeleton;Bacterial invasion of epithelial cells;Human papillomavirus infection;ECM-receptor interaction;Pathways in cancer;Small cell lung cancer;AGE-RAGE signaling pathway in diabetic complications;Proteoglycans in cancer;PI3K-Akt signaling pathway;Focal adhesion	Human Diseases;Cellular Processes;Human Diseases;Human Diseases;Environmental Information Processing;Human Diseases;Human Diseases;Human Diseases;Human Diseases;Environmental Information Processing;Cellular Processes	FN1
ENSG00000138623	1.66071	yes	up	0.000150139	yes	chr15	-	74411501	74412500	exon	first exon	NA	ENST00000543145	1.98345	no	up	0.115371	no	GO:0007399;GO:0016020;GO:0048675;GO:0001649;GO:0009897;GO:0050919;GO:0031225;GO:0021988;GO:0045773;GO:0005178;GO:0005515;GO:0031175;GO:0001934;GO:0007229;GO:0060907;GO:0005886;GO:0030154;GO:0006954;GO:0050727;GO:0007275;GO:0006955;GO:0070374;GO:0038191	nervous system development;membrane;axon extension;osteoblast differentiation;external side of plasma membrane;negative chemotaxis;anchored component of membrane;olfactory lobe development;positive regulation of axon extension;integrin binding;protein binding;neuron projection development;positive regulation of protein phosphorylation;integrin-mediated signaling pathway;positive regulation of mac…	ko04360	Axon guidance	Organismal Systems	SEMA7A
ENSG00000205763	0.471609	yes	down	1.94023e-08	yes	chr7	-	32915001	32916000	downstream	NA	NA	ENST00000381639	0.44001	yes	down	0.11542	no	.	.	.	.	.	RP9P
ENSG00000115902	0.309551	yes	down	0.000121654	yes	chr2	+	64989501	64990500	intron	first intron	NA	ENST00000480594	0.456331	yes	down	0.117574	no	GO:0030425;GO:0015826;GO:0016020;GO:0015824;GO:0043025;GO:0015186;GO:0006821;GO:0005887;GO:0015194;GO:1902476;GO:0034590;GO:0015193;GO:0070062;GO:0015175;GO:0006868;GO:0015825;GO:0050890;GO:0006865;GO:0035249;GO:0015184;GO:0042470;GO:0015293;GO:0015195;GO:0003333;GO:0016021;GO:0005254;GO:0034589;GO:0005886;GO:0006810;GO:0055085;GO:0035524;GO:0015808;GO:0005882;GO:0009986;GO:0015180;GO:0015171;GO:…	dendrite;threonine transport;membrane;proline transport;neuronal cell body;L-glutamine transmembrane transporter activity;chloride transport;integral component of plasma membrane;L-serine transmembrane transporter activity;chloride transmembrane transport;L-hydroxyproline transmembrane transporter activity;L-proline transmembrane transporter activity;extracellular vesicular exosome;neutral amino …	.	.	.	SLC1A4
ENSG00000173706	1.72242	yes	up	5.98283e-07	yes	chr3	-	125057001	125058000	promoter	Distal	ICP	ENST00000311127	0.461554	yes	down	0.118094	no	GO:0030324;GO:0003222;GO:0016020;GO:0003209;GO:0007043;GO:0009897;GO:0050878;GO:0030054;GO:0045216;GO:0001944;GO:0009791;GO:0005515;GO:0005911;GO:0016021;GO:0005576;GO:0001570;GO:0005886;GO:0003281;GO:0003017;GO:0001886;GO:0007507;GO:0001945;GO:0001701;GO:0001885;GO:0035264;GO:0009986;GO:0090271;GO:0007275;GO:0005509;GO:0055017;GO:0048845;GO:0060039	lung development;ventricular trabecula myocardium morphogenesis;membrane;cardiac atrium morphogenesis;cell-cell junction assembly;external side of plasma membrane;regulation of body fluid levels;cell junction;cell-cell junction organization;vasculature development;post-embryonic development;protein binding;cell-cell junction;integral component of membrane;extracellular region;vasculogenesis;plasm…	.	.	.	HEG1
ENSG00000149970	1.26526	yes	up	0.00034401	yes	chrX	+	21656001	21657000	downstream	NA	NA	ENST00000425654	0.458236	yes	down	0.118524	no	GO:0070062;GO:0016020;GO:0042802;GO:0014069;GO:0005737;GO:0043025;GO:0043005;GO:0009966;GO:0045211	extracellular vesicular exosome;membrane;identical protein binding;postsynaptic density;cytoplasm;neuronal cell body;neuron projection;regulation of signal transduction;postsynaptic membrane	.	.	.	CNKSR2
ENSG00000112796	2.66346	yes	up	0.000798278	yes	chr6	-	46166501	46167500	exon	first exon	NA	ENST00000230565	0.447882	yes	down	0.118869	no	GO:0016020;GO:0008152;GO:0007154;GO:0003824;GO:0046872;GO:0016787;GO:0016021;GO:0005576;GO:0005886	membrane;metabolic process;cell communication;catalytic activity;metal ion binding;hydrolase activity;integral component of membrane;extracellular region;plasma membrane	.	.	.	ENPP5
ENSG00000187210	1.61003	yes	up	0.000680804	yes	chr9	+	76563501	76564500	exon	internal exon	NA	ENST00000444201	1.95762	no	up	0.119364	no	GO:0008375;GO:0016020;GO:0005615;GO:0006486;GO:0009101;GO:0050901;GO:0003829;GO:0000139;GO:0005515;GO:0016021;GO:0048729;GO:0032868;GO:0005802;GO:0016266;GO:0016757;GO:0060352;GO:0005794;GO:0060993;GO:0016740;GO:0031985	acetylglucosaminyltransferase activity;membrane;extracellular space;protein glycosylation;glycoprotein biosynthetic process;leukocyte tethering or rolling;beta-1,3-galactosyl-O-glycosyl-glycoprotein beta-1,6-N-acetylglucosaminyltransferase activity;Golgi membrane;protein binding;integral component of membrane;tissue morphogenesis;response to insulin;trans-Golgi network;O-glycan processing;transfe…	ko00512	Mucin type O-glycan biosynthesis	Metabolism	GCNT1
ENSG00000178498	0.251592	yes	down	5.39212e-08	yes	chr12	+	57610001	57611000	downstream	NA	NA	ENST00000337737	1.98273	no	up	0.119711	no	GO:0046872;GO:0005515;GO:0016567;GO:0007219;GO:0016740;GO:0005737	metal ion binding;protein binding;protein ubiquitination;Notch signaling pathway;transferase activity;cytoplasm	ko04330	Notch signaling pathway	Environmental Information Processing	DTX3
ENSG00000189164	1.60702	yes	up	0.000122327	yes	chr19	+	37368501	37369500	promoter	Distal	ICP	ENST00000436120	2.00873	yes	up	0.120117	no	GO:0003677;GO:0046872;GO:0005634;GO:0006355;GO:0005622;GO:0006351;GO:0003676	DNA binding;metal ion binding;nucleus;regulation of transcription, DNA-templated;intracellular;transcription, DNA-templated;nucleic acid binding	.	.	.	ZNF527
ENSG00000066279	0.176829	yes	down	2.37303e-08	yes	chr1	-	197146501	197147500	exon	first exon	NA	ENST00000367409	1.9389	no	up	0.12012	no	GO:0036449;GO:0000922;GO:0005874;GO:0090306;GO:0048477;GO:0007420;GO:0007283;GO:0005737;GO:0030496;GO:0051653;GO:0008584;GO:0051661;GO:0007051;GO:0021987;GO:0005819;GO:0005516;GO:0021873;GO:0002052;GO:0005856;GO:0005634;GO:0072687;GO:0097431;GO:0090263;GO:0045665;GO:0045769;GO:0001764;GO:0051301;GO:0048589;GO:0051445;GO:0007049;GO:0097150	microtubule minus-end;spindle pole;microtubule;spindle assembly involved in meiosis;oogenesis;brain development;spermatogenesis;cytoplasm;midbody;spindle localization;male gonad development;maintenance of centrosome location;spindle organization;cerebral cortex development;spindle;calmodulin binding;forebrain neuroblast division;positive regulation of neuroblast proliferation;cytoskeleton;nucleus…	.	.	.	ASPM
ENSG00000106012	1.07696	yes	up	0.000346101	yes	chr7	+	2577001	2578000	promoter	Distal	ICP	ENST00000402050	1.92958	no	up	0.121491	no	GO:0060170;GO:0005929;GO:0005515;GO:0019898;GO:0045944;GO:0005739	ciliary membrane;cilium;protein binding;extrinsic component of membrane;positive regulation of transcription from RNA polymerase II promoter;mitochondrion	.	.	.	IQCE
ENSG00000176700	2.92469	yes	up	7.27714e-07	yes	chr15	+	84642001	84643000	downstream	NA	NA	ENST00000427525	0.454004	yes	down	0.122105	no	.	.	.	.	.	SCAND2P
ENSG00000101194	2.3009	yes	up	7.44749e-09	yes	chr20	+	62965501	62966500	intron	internal intron	NA	ENST00000370351	0.455335	yes	down	0.12249	no	GO:0006820;GO:0016020;GO:0006810;GO:0055085;GO:1903146;GO:0016021;GO:0005215;GO:0006887;GO:0022857	anion transport;membrane;transport;transmembrane transport;regulation of mitochondrion degradation;integral component of membrane;transporter activity;exocytosis;transmembrane transporter activity	.	.	.	SLC17A9
ENSG00000147234	0.210526	yes	down	2.8715e-05	yes	chrX	+	107542001	107543000	promoter	Distal	LCP	ENST00000276185	0.460367	yes	down	0.122842	no	GO:0005856;GO:0030667;GO:0043312;GO:0070821;GO:0005886	cytoskeleton;secretory granule membrane;neutrophil degranulation;tertiary granule membrane;plasma membrane	.	.	.	FRMPD3
ENSG00000139734	0.566434	yes	down	0.000105556	yes	chr13	-	59860501	59861500	exon	last exon	NA	ENST00000400324	2.00584	yes	up	0.124547	no	GO:0005634;GO:0017048;GO:0016043;GO:0030036;GO:0007283;GO:0005737;GO:0045296;GO:0003779;GO:0005829	nucleus;Rho GTPase binding;cellular component organization;actin cytoskeleton organization;spermatogenesis;cytoplasm;cadherin binding;actin binding;cytosol	ko04810	Regulation of actin cytoskeleton	Cellular Processes	DIAPH3
ENSG00000122126	1.57401	yes	up	0.000295143	yes	chrX	+	129553001	129554000	intron	internal intron	NA	ENST00000371113	1.93656	no	up	0.126314	no	GO:0016020;GO:0048365;GO:0031410;GO:0006661;GO:0005737;GO:0060271;GO:0016787;GO:0005515;GO:0005769;GO:0052745;GO:0070062;GO:0007165;GO:0030136;GO:0030670;GO:0001750;GO:0005768;GO:0031901;GO:0004439;GO:0051056;GO:0006629;GO:0005929;GO:0042995;GO:0036092;GO:0043547;GO:0005795;GO:0005829;GO:0005798;GO:0005886;GO:0034596;GO:0005634;GO:0001701;GO:0030030;GO:0005802;GO:0061024;GO:0043087;GO:0052659;GO:…	membrane;Rac GTPase binding;cytoplasmic vesicle;phosphatidylinositol biosynthetic process;cytoplasm;cilium morphogenesis;hydrolase activity;protein binding;early endosome;inositol phosphate phosphatase activity;extracellular vesicular exosome;signal transduction;clathrin-coated vesicle;phagocytic vesicle membrane;photoreceptor outer segment;endosome;early endosome membrane;phosphatidylinositol-4,…	ko04070;ko00562	Phosphatidylinositol signaling system;Inositol phosphate metabolism	Environmental Information Processing;Metabolism	OCRL
ENSG00000100372	1.34668	yes	up	0.000380821	yes	chr22	-	40780501	40781500	promoter	Distal	LCP	ENST00000435456	1.94079	no	up	0.126389	no	GO:0016020;GO:0015867;GO:0051087;GO:0005777;GO:0005737;GO:0006839;GO:0006635;GO:0000295;GO:0051724;GO:0005515;GO:0080122;GO:0015228;GO:0016021;GO:0005739;GO:0080121;GO:0005778;GO:0006810;GO:0055085;GO:0001561;GO:0015908;GO:0015217;GO:1901679;GO:0005779;GO:0043132;GO:0044610;GO:0005347;GO:0035349;GO:0015230;GO:0005743;GO:0035350;GO:0015866;GO:0005215	membrane;ATP transport;chaperone binding;peroxisome;cytoplasm;mitochondrial transport;fatty acid beta-oxidation;adenine nucleotide transmembrane transporter activity;NAD transporter activity;protein binding;AMP transmembrane transporter activity;coenzyme A transmembrane transporter activity;integral component of membrane;mitochondrion;AMP transport;peroxisomal membrane;transport;transmembrane tra…	ko04146	Peroxisome	Cellular Processes	SLC25A17
ENSG00000176700	2.92469	yes	up	7.27714e-07	yes	chr15	+	84642001	84643000	downstream	NA	NA	ENST00000348993	0.467504	yes	down	0.126589	no	.	.	.	.	.	SCAND2P
ENSG00000186481	1.92754	yes	up	0.000807914	yes	chr18	+	14200501	14201500	intron	internal intron	NA	ENST00000431648	0.455779	yes	down	0.128104	no	.	.	.	.	.	ANKRD20A5P
ENSG00000112053	0.410714	yes	down	5.90854e-05	yes	chr6	-	36025001	36026000	promoter	Distal	LCP	ENST00000490799	1.96402	no	up	0.130672	no	GO:0016020;GO:0007283;GO:0015106;GO:0015301;GO:0005887;GO:0006821;GO:0005515;GO:1902358;GO:0015116;GO:0051321;GO:0005254;GO:0016021;GO:0019532;GO:0098656;GO:0005886;GO:0042391;GO:1902476;GO:0006820;GO:0006810;GO:0055085;GO:0030317;GO:0030154;GO:0008272;GO:0051453;GO:0006811;GO:0015701;GO:0019531;GO:0007275;GO:0048240;GO:0008271;GO:0008509	membrane;spermatogenesis;bicarbonate transmembrane transporter activity;anion:anion antiporter activity;integral component of plasma membrane;chloride transport;protein binding;sulfate transmembrane transport;sulfate transmembrane transporter activity;meiotic cell cycle;chloride channel activity;integral component of membrane;oxalate transport;anion transmembrane transport;plasma membrane;regulat…	.	.	.	SLC26A8
ENSG00000081760	1.81209	yes	up	0.000653049	yes	chr12	+	125114001	125115000	intron	internal intron	NA	ENST00000545511	0.454442	yes	down	0.130862	no	GO:0030729;GO:0032024;GO:0014070;GO:0005524;GO:0050872;GO:0005737;GO:0045471;GO:0016874;GO:0047760;GO:0005515;GO:0000166;GO:0005829;GO:0006631;GO:0007584;GO:0034201;GO:0046951;GO:0042493;GO:0071394;GO:0008152;GO:0001889;GO:0010243;GO:0003824;GO:0060612;GO:0014074;GO:0071397;GO:0071333;GO:0042594;GO:0006629	acetoacetate-CoA ligase activity;positive regulation of insulin secretion;response to organic cyclic compound;ATP binding;white fat cell differentiation;cytoplasm;response to ethanol;ligase activity;butyrate-CoA ligase activity;protein binding;nucleotide binding;cytosol;fatty acid metabolic process;response to nutrient;response to oleic acid;ketone body biosynthetic process;response to drug;cellu…	ko00280;ko00650	Valine, leucine and isoleucine degradation;Butanoate metabolism	Metabolism;Metabolism	AACS
ENSG00000165914	0.507987	yes	down	1.89999e-05	yes	chr14	-	90577501	90578500	intron	internal intron	NA	ENST00000328459	1.88956	no	up	0.133703	no	GO:0016020;GO:0090002;GO:0005515;GO:0005829;GO:0005886;GO:0005737;GO:0046854	membrane;establishment of protein localization to plasma membrane;protein binding;cytosol;plasma membrane;cytoplasm;phosphatidylinositol phosphorylation	.	.	.	TTC7B
ENSG00000150764	2.12632	yes	up	6.30672e-05	yes	chr11	+	111997001	111998000	downstream	NA	NA	ENST00000440460	1.95565	no	up	0.133728	no	GO:0070507;GO:0021799;GO:0030054;GO:0032956;GO:0005737;GO:0021795;GO:0043015;GO:0005515;GO:0005829;GO:0005925;GO:0021869;GO:0090263;GO:0045665;GO:0003779;GO:0021846;GO:0030177;GO:0060070;GO:0019904;GO:0007275;GO:0016055;GO:0007049	regulation of microtubule cytoskeleton organization;cerebral cortex radially oriented cell migration;cell junction;regulation of actin cytoskeleton organization;cytoplasm;cerebral cortex cell migration;gamma-tubulin binding;protein binding;cytosol;focal adhesion;forebrain ventricular zone progenitor cell division;positive regulation of canonical Wnt signaling pathway;negative regulation of neuron…	.	.	.	DIXDC1
ENSG00000184661	1.45238	yes	up	3.20501e-05	yes	chr8	+	25461501	25462500	intron	internal intron	NA	ENST00000330560	1.95582	no	up	0.134155	no	GO:0005654;GO:0005634;GO:0007059;GO:0051301;GO:0005829;GO:0035307;GO:0005694;GO:0007049	nucleoplasm;nucleus;chromosome segregation;cell division;cytosol;positive regulation of protein dephosphorylation;chromosome;cell cycle	.	.	.	CDCA2
ENSG00000107890	0.336552	yes	down	0.000246988	yes	chr10	-	27099501	27100500	exon	first exon	NA	ENST00000436985	1.88684	no	up	0.134529	no	GO:0005813	centrosome	.	.	.	ANKRD26
ENSG00000172572	0.118644	yes	down	3.30446e-10	yes	chr12	+	20368501	20369500	exon	first exon	NA	ENST00000359062	1.88291	no	up	0.135702	no	GO:0030552;GO:0016020;GO:0004114;GO:0047555;GO:0071560;GO:0004119;GO:0043116;GO:0019934;GO:0016787;GO:0005829;GO:0016021;GO:0043117;GO:0060282;GO:0042493;GO:0007165;GO:0051591;GO:0040020;GO:0043066;GO:0001556;GO:0071321;GO:0019933;GO:0046872;GO:0006198;GO:0016101;GO:0008081;GO:0004115;GO:0006629	cAMP binding;membrane;3',5'-cyclic-nucleotide phosphodiesterase activity;3',5'-cyclic-GMP phosphodiesterase activity;cellular response to transforming growth factor beta stimulus;cGMP-inhibited cyclic-nucleotide phosphodiesterase activity;negative regulation of vascular permeability;cGMP-mediated signaling;hydrolase activity;cytosol;integral component of membrane;positive regulation of vascular p…	ko04024;ko00230;ko05032;ko04022;ko04924	cAMP signaling pathway;Purine metabolism;Morphine addiction;cGMP-PKG signaling pathway;Renin secretion	Environmental Information Processing;Metabolism;Human Diseases;Environmental Information Processing;Organismal Systems	PDE3A
ENSG00000198324	1.69982	yes	up	0.00018898	yes	chr12	-	111358501	111359500	downstream	NA	NA	ENST00000361483	1.94143	no	up	0.135971	no	GO:0001881;GO:0030136;GO:0031410;GO:0042147;GO:0005802;GO:0042803;GO:0005768;GO:0005515;GO:0005829;GO:0005794;GO:0007032;GO:0055037;GO:0005769	receptor recycling;clathrin-coated vesicle;cytoplasmic vesicle;retrograde transport, endosome to Golgi;trans-Golgi network;protein homodimerization activity;endosome;protein binding;cytosol;Golgi apparatus;endosome organization;recycling endosome;early endosome	.	.	.	FAM109A
ENSG00000164002	2.23704	yes	up	0.000267097	yes	chr1	+	40508501	40509500	intron	last intron	NA	ENST00000372703	0.462178	yes	down	0.136095	no	GO:0003677;GO:0008310;GO:0006259;GO:0045145;GO:0005737;GO:0016787;GO:0005829;GO:0051539;GO:0036297;GO:0006974;GO:0005634;GO:0005654;GO:0006281;GO:0042803;GO:0051536;GO:0004518;GO:0046872;GO:0004527;GO:0090305	DNA binding;single-stranded DNA 3'-5' exodeoxyribonuclease activity;DNA metabolic process;single-stranded DNA 5'-3' exodeoxyribonuclease activity;cytoplasm;hydrolase activity;cytosol;4 iron, 4 sulfur cluster binding;interstrand cross-link repair;cellular response to DNA damage stimulus;nucleus;nucleoplasm;DNA repair;protein homodimerization activity;iron-sulfur cluster binding;nuclease activity;m…	.	.	.	EXO5
ENSG00000111676	0.563884	yes	down	0.000519262	yes	chr12	+	6935501	6936500	exon	internal exon	NA	ENST00000396684	0.477041	yes	down	0.138432	no	GO:0005654;GO:0005634;GO:0051402;GO:0003714;GO:0006355;GO:0030054;GO:0016363;GO:0006351;GO:0007417;GO:0005737;GO:0048471;GO:0000122;GO:0019904;GO:0005515	nucleoplasm;nucleus;neuron apoptotic process;transcription corepressor activity;regulation of transcription, DNA-templated;cell junction;nuclear matrix;transcription, DNA-templated;central nervous system development;cytoplasm;perinuclear region of cytoplasm;negative regulation of transcription from RNA polymerase II promoter;protein domain specific binding;protein binding	.	.	.	ATN1
ENSG00000117724	1.46528	yes	up	1.65972e-06	yes	chr1	+	214646001	214647000	promoter	Intermediate	LCP	ENST00000366955	1.86308	no	up	0.14085	no	GO:0070840;GO:0005737;GO:0005515;GO:0003682;GO:0000940;GO:0051310;GO:0000777;GO:0015031;GO:0045892;GO:0005856;GO:0042493;GO:0005654;GO:0030154;GO:0005694;GO:0021591;GO:0048471;GO:0010389;GO:0071897;GO:0008022;GO:0007275;GO:0051726;GO:0000776;GO:0097539;GO:0005930;GO:0045120;GO:0000278;GO:0000922;GO:0001822;GO:0007059;GO:0005635;GO:0007094;GO:0030496;GO:0036064;GO:0008283;GO:0005829;GO:0005819;GO:…	dynein complex binding;cytoplasm;protein binding;chromatin binding;condensed chromosome outer kinetochore;metaphase plate congression;condensed chromosome kinetochore;protein transport;negative regulation of transcription, DNA-templated;cytoskeleton;response to drug;nucleoplasm;cell differentiation;chromosome;ventricular system development;perinuclear region of cytoplasm;regulation of G2/M transi…	.	.	.	CENPF
ENSG00000250510	1.50594	yes	up	0.000545351	yes	chr12	+	6831001	6832000	downstream	NA	NA	ENST00000535220	1.90762	no	up	0.141093	no	GO:0007186;GO:0016020;GO:0007165;GO:0016021;GO:0004871;GO:0005886;GO:0004930	G-protein coupled receptor signaling pathway;membrane;signal transduction;integral component of membrane;signal transducer activity;plasma membrane;G-protein coupled receptor activity	.	.	.	GPR162
ENSG00000071909	1.73521	yes	up	8.91563e-05	yes	chr2	+	170656501	170657500	downstream	NA	NA	ENST00000602629	0.466182	yes	down	0.141366	no	GO:0016310;GO:0005524;GO:0003774;GO:0007601;GO:0090103;GO:0005737;GO:0000166;GO:0004672;GO:0050896;GO:0005856;GO:0016301;GO:0032426;GO:0006468;GO:0003779;GO:0004674;GO:0016459;GO:0007605;GO:0016740	phosphorylation;ATP binding;motor activity;visual perception;cochlea morphogenesis;cytoplasm;nucleotide binding;protein kinase activity;response to stimulus;cytoskeleton;kinase activity;stereocilium bundle tip;protein phosphorylation;actin binding;protein serine/threonine kinase activity;myosin complex;sensory perception of sound;transferase activity	.	.	.	MYO3B
ENSG00000158106	1.64294	yes	up	0.000534358	yes	chr8	+	143381501	143382500	exon	last exon	NA	ENST00000522899	1.9127	no	up	0.141431	no	GO:0005515;GO:0007165;GO:0005829	protein binding;signal transduction;cytosol	.	.	.	RHPN1
ENSG00000119673	4.48837	yes	up	3.26761e-09	yes	chr14	+	73572001	73573000	promoter	Distal	LCP	ENST00000613168	0.465209	yes	down	0.141668	no	GO:0005759;GO:0070062;GO:0000038;GO:0052689;GO:0005102;GO:0001676;GO:0047617;GO:0016787;GO:0016790;GO:0016290;GO:0005739;GO:0006637	mitochondrial matrix;extracellular vesicular exosome;very long-chain fatty acid metabolic process;carboxylic ester hydrolase activity;receptor binding;long-chain fatty acid metabolic process;acyl-CoA hydrolase activity;hydrolase activity;thiolester hydrolase activity;palmitoyl-CoA hydrolase activity;mitochondrion;acyl-CoA metabolic process	ko00062;ko01040;ko04913	Fatty acid elongation;Biosynthesis of unsaturated fatty acids;Ovarian steroidogenesis	Metabolism;Metabolism;Organismal Systems	ACOT2
ENSG00000167130	1.7204	yes	up	2.76528e-07	yes	chr9	+	129086501	129087500	intron	last intron	NA	ENST00000372546	1.8753	no	up	0.142028	no	GO:0016020;GO:0006486;GO:0005783;GO:0047874;GO:0016787;GO:0006489;GO:0030176;GO:0016021;GO:0006487;GO:0005789;GO:0008610	membrane;protein glycosylation;endoplasmic reticulum;dolichyldiphosphatase activity;hydrolase activity;dolichyl diphosphate biosynthetic process;integral component of endoplasmic reticulum membrane;integral component of membrane;protein N-linked glycosylation;endoplasmic reticulum membrane;lipid biosynthetic process	ko00510	N-Glycan biosynthesis	Metabolism	DOLPP1
ENSG00000162552	1.5867	yes	up	3.37944e-05	yes	chr1	-	22121501	22122500	intron	internal intron	NA	ENST00000290167	0.476028	yes	down	0.143368	no	GO:0005737;GO:0008584;GO:0061369;GO:0071560;GO:0090090;GO:0090002;GO:2000019;GO:0030237;GO:0001837;GO:0048754;GO:0001823;GO:0035567;GO:0070062;GO:0061180;GO:0051894;GO:0090263;GO:2000066;GO:0060070;GO:0030325;GO:0045596;GO:0016055;GO:0061205;GO:0042445;GO:0030666;GO:0033077;GO:0035239;GO:0045893;GO:0006702;GO:0060126;GO:0005576;GO:0005886;GO:2001234;GO:0072174;GO:0001656;GO:0045669;GO:0008585;GO:…	cytoplasm;male gonad development;negative regulation of testicular blood vessel morphogenesis;cellular response to transforming growth factor beta stimulus;negative regulation of canonical Wnt signaling pathway;establishment of protein localization to plasma membrane;negative regulation of male gonad development;female sex determination;epithelial to mesenchymal transition;branching morphogenesis…	ko05217;ko04360;ko05224;ko04150;ko05225;ko05165;ko04390;ko04550;ko05200;ko04310;ko05205;ko04919;ko04916;ko05166;ko05226	Basal cell carcinoma;Axon guidance;Breast cancer;mTOR signaling pathway;Hepatocellular carcinoma;Human papillomavirus infection;Hippo signaling pathway;Signaling pathways regulating pluripotency of stem cells;Pathways in cancer;Wnt signaling pathway;Proteoglycans in cancer;Thyroid hormone signaling pathway;Melanogenesis;HTLV-I infection;Gastric cancer	Human Diseases;Organismal Systems;Human Diseases;Environmental Information Processing;Human Diseases;Human Diseases;Environmental Information Processing;Cellular Processes;Human Diseases;Environmental Information Processing;Human Diseases;Organismal Systems;Organismal Systems;Human Diseases;Human Diseases	WNT4
ENSG00000251247	0.462121	yes	down	0.000144254	yes	chr19	+	36876001	36877000	intron	internal intron	NA	ENST00000529555	1.92135	no	up	0.146116	no	GO:0006359;GO:0003677;GO:0005634;GO:0006355;GO:0006351;GO:0006366;GO:0003676;GO:0000122;GO:0046872;GO:0003700;GO:0006383	regulation of transcription from RNA polymerase III promoter;DNA binding;nucleus;regulation of transcription, DNA-templated;transcription, DNA-templated;transcription from RNA polymerase II promoter;nucleic acid binding;negative regulation of transcription from RNA polymerase II promoter;metal ion binding;sequence-specific DNA binding transcription factor activity;transcription from RNA polymeras…	.	.	.	ZNF345
ENSG00000204576	0.55914	yes	down	0.000694778	yes	chr6	+	30565001	30566000	downstream	NA	NA	ENST00000498336	0.471738	yes	down	0.147729	no	GO:0046872;GO:0003723;GO:0005515	metal ion binding;RNA binding;protein binding	.	.	.	PRR3
ENSG00000143674	1.79654	yes	up	0.000798233	yes	chr1	+	233383001	233384000	exon	last exon	NA	ENST00000366624	0.476784	yes	down	0.148008	no	GO:0016310;GO:0005524;GO:0004706;GO:0035556;GO:0005737;GO:0007256;GO:0005515;GO:0000166;GO:0004672;GO:0004871;GO:0000186;GO:0005634;GO:0000165;GO:0004709;GO:0016301;GO:0005622;GO:0006468;GO:0042803;GO:0046777;GO:0007257;GO:0004674;GO:0016740	phosphorylation;ATP binding;JUN kinase kinase kinase activity;intracellular signal transduction;cytoplasm;activation of JNKK activity;protein binding;nucleotide binding;protein kinase activity;signal transducer activity;activation of MAPKK activity;nucleus;MAPK cascade;MAP kinase kinase kinase activity;kinase activity;intracellular;protein phosphorylation;protein homodimerization activity;protein…	.	.	.	MAP3K21
ENSG00000196922	1.54187	yes	up	0.000259093	yes	chr8	-	145000501	145001500	intron	first intron	NA	ENST00000427606	0.473896	yes	down	0.149672	no	.	.	.	.	.	ZNF252P
ENSG00000188157	1.6115	yes	up	0.000498121	yes	chr1	+	1056001	1057000	downstream	NA	NA	ENST00000620552	1.83646	no	up	0.149866	no	GO:0016020;GO:0035374;GO:0033691;GO:0030054;GO:0002162;GO:0006024;GO:0005515;GO:0030203;GO:0005605;GO:0070062;GO:0007213;GO:0007165;GO:0030154;GO:0001523;GO:0030198;GO:0045944;GO:0007275;GO:0007010;GO:0045887;GO:0043547;GO:0005796;GO:0043395;GO:0005829;GO:0016021;GO:0005576;GO:0043202;GO:0050808;GO:0005886;GO:0045202;GO:0006027;GO:0031012;GO:0043113;GO:0051491;GO:0005200;GO:0043236;GO:0045162;GO:…	membrane;chondroitin sulfate binding;sialic acid binding;cell junction;dystroglycan binding;glycosaminoglycan biosynthetic process;protein binding;glycosaminoglycan metabolic process;basal lamina;extracellular vesicular exosome;G-protein coupled acetylcholine receptor signaling pathway;signal transduction;cell differentiation;retinoid metabolic process;extracellular matrix organization;positive r…	ko04512	ECM-receptor interaction	Environmental Information Processing	AGRN
ENSG00000115107	1.38927	yes	up	0.000525503	yes	chr2	+	119238501	119239500	intron	internal intron	NA	ENST00000393110	1.85798	no	up	0.150864	no	GO:0010008;GO:0016020;GO:0055114;GO:0005737;GO:0055072;GO:0098706;GO:0005515;GO:0005887;GO:0033572;GO:0016021;GO:0016491;GO:0008823;GO:0006810;GO:0052851;GO:0006811;GO:0006915;GO:0005768;GO:0009306;GO:0046872;GO:0015677;GO:0005771;GO:0016723;GO:0007049;GO:0042981	endosome membrane;membrane;oxidation-reduction process;cytoplasm;iron ion homeostasis;ferric iron import across plasma membrane;protein binding;integral component of plasma membrane;transferrin transport;integral component of membrane;oxidoreductase activity;cupric reductase activity;transport;ferric-chelate reductase (NADPH) activity;ion transport;apoptotic process;endosome;protein secretion;met…	ko04115;ko04216	p53 signaling pathway;Ferroptosis	Cellular Processes;Cellular Processes	STEAP3
ENSG00000164741	0.581769	yes	down	5.50547e-05	yes	chr8	-	13100501	13101500	promoter	Intermediate	LCP	ENST00000276297	1.8768	no	up	0.150982	no	GO:0016020;GO:0030054;GO:0032587;GO:0032956;GO:0005737;GO:0030864;GO:0005515;GO:1900119;GO:0008285;GO:0030036;GO:0007165;GO:0005925;GO:0008360;GO:0006915;GO:0008289;GO:0030900;GO:0001843;GO:0006919;GO:0051056;GO:0035307;GO:0021575;GO:0043547;GO:0003007;GO:0005901;GO:0051497;GO:0005829;GO:0048041;GO:0005634;GO:0030336;GO:0051895;GO:0042169;GO:0035023;GO:0035024;GO:0005096	membrane;cell junction;ruffle membrane;regulation of actin cytoskeleton organization;cytoplasm;cortical actin cytoskeleton;protein binding;positive regulation of execution phase of apoptosis;negative regulation of cell proliferation;actin cytoskeleton organization;signal transduction;focal adhesion;regulation of cell shape;apoptotic process;lipid binding;forebrain development;neural tube closure;…	.	.	.	DLC1
ENSG00000197816	0.68523	yes	down	9.7265e-05	yes	chr9	+	97370501	97371500	exon	first exon	NA	ENST00000529487	0.480656	yes	down	0.151078	no	GO:0070062;GO:0016020;GO:0016021	extracellular vesicular exosome;membrane;integral component of membrane	.	.	.	CCDC180
ENSG00000122378	0.287335	yes	down	1.18486e-06	yes	chr10	+	80407501	80408500	exon	first exon	NA	ENST00000606162	1.90794	no	up	0.151323	no	GO:0016209;GO:0070062;GO:0045670;GO:0005576;GO:0055114;GO:0005737	antioxidant activity;extracellular vesicular exosome;regulation of osteoclast differentiation;extracellular region;oxidation-reduction process;cytoplasm	.	.	.	FAM213A
ENSG00000011451	2.34385	yes	up	2.42192e-07	yes	chr19	-	15438001	15439000	exon	first exon	NA	ENST00000545156	1.83793	no	up	0.151619	no	GO:0070062;GO:0005654;GO:0005634;GO:0030496;GO:0003676;GO:0046872;GO:0010571;GO:0005515;GO:0070208;GO:0070984;GO:0050821	extracellular vesicular exosome;nucleoplasm;nucleus;midbody;nucleic acid binding;metal ion binding;positive regulation of nuclear cell cycle DNA replication;protein binding;protein heterotrimerization;SET domain binding;protein stabilization	.	.	.	WIZ
ENSG00000151287	2.37464	yes	up	2.06507e-10	yes	chr13	-	102774501	102775500	promoter	Distal	HCP	ENST00000376032	0.476204	yes	down	0.153271	no	GO:0016787	hydrolase activity	.	.	.	TEX30
ENSG00000132122	1.82462	yes	up	2.40781e-13	yes	chr1	-	48435501	48436500	intron	first intron	NA	ENST00000371847	1.84361	no	up	0.153318	no	GO:0042995;GO:0032027;GO:0030154;GO:0007275;GO:0005576;GO:0044458;GO:0007283;GO:0097224	cell projection;myosin light chain binding;cell differentiation;multicellular organismal development;extracellular region;motile cilium assembly;spermatogenesis;sperm connecting piece	.	.	.	SPATA6
ENSG00000151062	0.457441	yes	down	7.46536e-09	yes	chr12	-	1907501	1908500	exon	internal exon	NA	ENST00000280663	0.485134	yes	down	0.155286	no	GO:0070588;GO:0016020;GO:0006810;GO:0061337;GO:0005244;GO:0050908;GO:0005245;GO:0034765;GO:0006816;GO:0006811;GO:0046872;GO:0016021;GO:0005262;GO:0005886;GO:0005891	calcium ion transmembrane transport;membrane;transport;cardiac conduction;voltage-gated ion channel activity;detection of light stimulus involved in visual perception;voltage-gated calcium channel activity;regulation of ion transmembrane transport;calcium ion transport;ion transport;metal ion binding;integral component of membrane;calcium channel activity;plasma membrane;voltage-gated calcium cha…	ko05414;ko04921;ko04261;ko04010;ko04260;ko05412;ko05410	Dilated cardiomyopathy (DCM);Oxytocin signaling pathway;Adrenergic signaling in cardiomyocytes;MAPK signaling pathway;Cardiac muscle contraction;Arrhythmogenic right ventricular cardiomyopathy (ARVC);Hypertrophic cardiomyopathy (HCM)	Human Diseases;Organismal Systems;Organismal Systems;Environmental Information Processing;Organismal Systems;Human Diseases;Human Diseases	CACNA2D4
ENSG00000166432	0.555785	yes	down	0.000587833	yes	chrX	-	101898001	101899000	exon	internal exon	NA	ENST00000488347	0.482679	yes	down	0.15561	no	GO:0072332;GO:0003723;GO:0003677;GO:0046872;GO:0005634;GO:0002039;GO:0008270;GO:0003676	intrinsic apoptotic signaling pathway by p53 class mediator;RNA binding;DNA binding;metal ion binding;nucleus;p53 binding;zinc ion binding;nucleic acid binding	.	.	.	ZMAT1
ENSG00000145555	1.82687	yes	up	0.00016186	yes	chr5	-	16674001	16675000	exon	internal exon	NA	ENST00000274203	1.84347	no	up	0.155688	no	GO:0051015;GO:0016020;GO:0060002;GO:0005938;GO:0003774;GO:0005737;GO:0043025;GO:0005515;GO:0030705;GO:0051489;GO:0005856;GO:0007165;GO:0008360;GO:0030027;GO:0043005;GO:0030175;GO:0005547;GO:0016459;GO:0030898;GO:0042995;GO:0005524;GO:0022409;GO:0032433;GO:0005730;GO:0005829;GO:0000166;GO:0005516;GO:0005886;GO:0031527;GO:0030507;GO:0006810;GO:0003779;GO:0001726;GO:0038096	actin filament binding;membrane;plus-end directed microfilament motor activity;cell cortex;motor activity;cytoplasm;neuronal cell body;protein binding;cytoskeleton-dependent intracellular transport;regulation of filopodium assembly;cytoskeleton;signal transduction;regulation of cell shape;lamellipodium;neuron projection;filopodium;phosphatidylinositol-3,4,5-trisphosphate binding;myosin complex;ac…	ko04666	Fc gamma R-mediated phagocytosis	Organismal Systems	MYO10
ENSG00000181873	1.79555	yes	up	1.41885e-06	yes	chr1	+	228174001	228175000	exon	internal exon	NA	ENST00000484749	0.48031	yes	down	0.15605	no	GO:0005759;GO:0016226;GO:0003723;GO:0005739;GO:0016740;GO:0006783	mitochondrial matrix;iron-sulfur cluster assembly;RNA binding;mitochondrion;transferase activity;heme biosynthetic process	.	.	.	IBA57
ENSG00000113249	1.47613	yes	up	0.000125517	yes	chr5	-	157055001	157056000	intron	internal intron	NA	ENST00000339252	0.477942	yes	down	0.156832	no	GO:0016020;GO:0031514;GO:0016021;GO:0001618;GO:0016032;GO:0046718	membrane;motile cilium;integral component of membrane;virus receptor activity;viral process;viral entry into host cell	.	.	.	HAVCR1
ENSG00000227372	0.242733	yes	down	0.000571102	yes	chr1	-	3746501	3747500	promoter	Intermediate	ICP	ENST00000452079	0.492933	yes	down	0.156841	no	.	.	.	.	.	TP73-AS1
ENSG00000165060	1.60521	yes	up	0.000683429	yes	chr9	+	69035001	69036000	intron	first intron	NA	ENST00000377270	1.84441	no	up	0.158019	no	GO:0006879;GO:0051537;GO:0051349;GO:0005737;GO:0090201;GO:0006783;GO:0034986;GO:0055072;GO:0005515;GO:0040015;GO:0070301;GO:0016540;GO:0008199;GO:0010039;GO:0043066;GO:0007005;GO:0016226;GO:0007628;GO:0008198;GO:0005759;GO:0030307;GO:0055114;GO:0009792;GO:0044281;GO:0006119;GO:0005829;GO:0046621;GO:0018283;GO:0005739;GO:0016491;GO:0043085;GO:0006810;GO:0051536;GO:0006811;GO:0009060;GO:0010722;GO:…	cellular iron ion homeostasis;2 iron, 2 sulfur cluster binding;positive regulation of lyase activity;cytoplasm;negative regulation of release of cytochrome c from mitochondria;heme biosynthetic process;iron chaperone activity;iron ion homeostasis;protein binding;negative regulation of multicellular organism growth;cellular response to hydrogen peroxide;protein autoprocessing;ferric iron binding;r…	ko00860	Porphyrin and chlorophyll metabolism	Metabolism	FXN
ENSG00000187800	3.13605	yes	up	0.000182608	yes	chr1	+	156892501	156893500	promoter	Proximal	ICP	ENST00000338302	1.81668	no	up	0.159198	no	GO:0016020;GO:0043654;GO:0045746;GO:0016021;GO:0001891;GO:0005886	membrane;recognition of apoptotic cell;negative regulation of Notch signaling pathway;integral component of membrane;phagocytic cup;plasma membrane	.	.	.	PEAR1
ENSG00000175344	0.460235	yes	down	7.53749e-08	yes	chr15	+	32108501	32109500	promoter	Distal	LCP	ENST00000637189	1.89239	no	up	0.160868	no	GO:1902430;GO:0016020;GO:0035095;GO:0035094;GO:0009897;GO:0015643;GO:0032715;GO:0060112;GO:0022848;GO:0042110;GO:0005892;GO:0007165;GO:0030673;GO:2000463;GO:0007271;GO:0001988;GO:0005216;GO:0033138;GO:0015276;GO:0050893;GO:0005886;GO:0060079;GO:0006874;GO:0048149;GO:0042391;GO:0006810;GO:0042803;GO:0048813;GO:0032225;GO:0007613;GO:0014061;GO:0016324;GO:0005230;GO:0097061;GO:0034220;GO:0030054;GO:…	negative regulation of beta-amyloid formation;membrane;behavioral response to nicotine;response to nicotine;external side of plasma membrane;toxic substance binding;negative regulation of interleukin-6 production;generation of ovulation cycle rhythm;acetylcholine-gated cation channel activity;T cell activation;acetylcholine-gated channel complex;signal transduction;axolemma;positive regulation of…	ko05033;ko04080;ko04020;ko04725;ko05204	Nicotine addiction;Neuroactive ligand-receptor interaction;Calcium signaling pathway;Cholinergic synapse;Chemical carcinogenesis	Human Diseases;Environmental Information Processing;Environmental Information Processing;Organismal Systems;Human Diseases	CHRNA7
ENSG00000063761	0.630098	yes	down	8.24697e-05	yes	chr14	+	77887001	77888000	intron	internal intron	NA	ENST00000238561	0.483815	yes	down	0.161488	no	GO:0016310;GO:0005524;GO:0016301;GO:0006468;GO:0004674;GO:0000166;GO:0005576;GO:0016740	phosphorylation;ATP binding;kinase activity;protein phosphorylation;protein serine/threonine kinase activity;nucleotide binding;extracellular region;transferase activity	.	.	.	ADCK1
ENSG00000171714	1.36878	yes	up	0.000532779	yes	chr11	+	22270501	22271500	promoter	Proximal	LCP	ENST00000324559	1.80761	no	up	0.1637	no	GO:0016020;GO:0005783;GO:0034220;GO:0005622;GO:0031982;GO:0046983;GO:0005229;GO:0006821;GO:0016021;GO:0005789;GO:0005886;GO:1902476	membrane;endoplasmic reticulum;ion transmembrane transport;intracellular;vesicle;protein dimerization activity;intracellular calcium activated chloride channel activity;chloride transport;integral component of membrane;endoplasmic reticulum membrane;plasma membrane;chloride transmembrane transport	.	.	.	ANO5
ENSG00000164309	3	yes	up	0.000112022	yes	chr5	+	79792501	79793500	exon	internal exon	NA	ENST00000446378	0.485063	yes	down	0.163708	no	GO:0031430;GO:0005515;GO:0005737;GO:0048471	M band;protein binding;cytoplasm;perinuclear region of cytoplasm	.	.	.	CMYA5
ENSG00000091436	1.95816	yes	up	2.64423e-05	yes	chr2	+	173263001	173264000	intron	last intron	NA	ENST00000375213	0.496941	yes	down	0.165955	no	GO:0016310;GO:0005737;GO:0043065;GO:0005515;GO:0004672;GO:0000186;GO:0030154;GO:0000077;GO:0016301;GO:0005622;GO:0006468;GO:0007257;GO:0000075;GO:0060173;GO:0009314;GO:0007010;GO:0016740;GO:0000287;GO:0003723;GO:0005524;GO:0006950;GO:0035556;GO:0007050;GO:0042733;GO:0008283;GO:0000166;GO:0005829;GO:0005634;GO:0004709;GO:0000165;GO:0008219;GO:0046872;GO:0004674;GO:0007049	phosphorylation;cytoplasm;positive regulation of apoptotic process;protein binding;protein kinase activity;activation of MAPKK activity;cell differentiation;DNA damage checkpoint;kinase activity;intracellular;protein phosphorylation;activation of JUN kinase activity;cell cycle checkpoint;limb development;response to radiation;cytoskeleton organization;transferase activity;magnesium ion binding;RN…	ko04010	MAPK signaling pathway	Environmental Information Processing	MAP3K20
ENSG00000180263	1.41011	yes	up	0.000256427	yes	chr12	-	95141501	95142500	intron	internal intron	NA	ENST00000343958	1.77939	no	up	0.169153	no	GO:0031267;GO:0046847;GO:0005085;GO:0043547;GO:0005737;GO:0005856;GO:0030036;GO:0030027;GO:0008360;GO:0001726;GO:0046872;GO:0043087;GO:0005794;GO:0007010;GO:0035023;GO:0005089	small GTPase binding;filopodium assembly;guanyl-nucleotide exchange factor activity;positive regulation of GTPase activity;cytoplasm;cytoskeleton;actin cytoskeleton organization;lamellipodium;regulation of cell shape;ruffle;metal ion binding;regulation of GTPase activity;Golgi apparatus;cytoskeleton organization;regulation of Rho protein signal transduction;Rho guanyl-nucleotide exchange factor a…	.	.	.	FGD6
ENSG00000197483	0.670882	yes	down	7.43681e-05	yes	chr19	+	55483001	55484000	exon	first exon	NA	ENST00000598519	1.85121	no	up	0.169476	no	GO:0003677;GO:0046872;GO:0005634;GO:0006355;GO:0006351;GO:0003700;GO:0003676	DNA binding;metal ion binding;nucleus;regulation of transcription, DNA-templated;transcription, DNA-templated;sequence-specific DNA binding transcription factor activity;nucleic acid binding	.	.	.	ZNF628
ENSG00000115138	1.39259	yes	up	0.00018728	yes	chr2	-	25160501	25161500	exon	last exon	NA	ENST00000380794	0.479577	yes	down	0.171162	no	GO:0034774;GO:0008217;GO:0005615;GO:0031782;GO:0032720;GO:0005102;GO:0005184;GO:0005737;GO:0042593;GO:0005179;GO:0016486;GO:0005576;GO:0007218;GO:0007165;GO:0006091;GO:0007267;GO:0070873;GO:0030141;GO:2000852;GO:0001664;GO:0032098;GO:0045944;GO:0033059;GO:0070996;GO:0031781	secretory granule lumen;regulation of blood pressure;extracellular space;type 4 melanocortin receptor binding;negative regulation of tumor necrosis factor production;receptor binding;neuropeptide hormone activity;cytoplasm;glucose homeostasis;hormone activity;peptide hormone processing;extracellular region;neuropeptide signaling pathway;signal transduction;generation of precursor metabolites and …	ko04927;ko04920;ko04925;ko04916	Cortisol synthesis and secretionè½New!;Adipocytokine signaling pathway;Aldosterone synthesis and secretion;Melanogenesis	Organismal Systems;Organismal Systems;Organismal Systems;Organismal Systems	POMC
ENSG00000040199	0.441687	yes	down	6.40856e-05	yes	chr16	-	71702501	71703500	intron	internal intron	NA	ENST00000538126	1.84349	no	up	0.171272	no	GO:0016020;GO:0005634;GO:0001917;GO:0007165;GO:0021766;GO:0003824;GO:0004722;GO:0005737;GO:0046872;GO:0016787;GO:0005515;GO:0005829;GO:0004721;GO:0006470;GO:0042622	membrane;nucleus;photoreceptor inner segment;signal transduction;hippocampus development;catalytic activity;protein serine/threonine phosphatase activity;cytoplasm;metal ion binding;hydrolase activity;protein binding;cytosol;phosphoprotein phosphatase activity;protein dephosphorylation;photoreceptor outer segment membrane	ko04151	PI3K-Akt signaling pathway	Environmental Information Processing	PHLPP2
ENSG00000196876	1.43205	yes	up	0.000531577	yes	chr12	+	51812501	51813500	downstream	NA	NA	ENST00000354534	1.82101	no	up	0.17284	no	GO:0007399;GO:0016020;GO:0035725;GO:0005524;GO:0043194;GO:0031410;GO:0034220;GO:0060078;GO:0019228;GO:0030018;GO:0086010;GO:0005515;GO:0000166;GO:0016021;GO:0006814;GO:0005886;GO:0042552;GO:0006810;GO:0055085;GO:0005244;GO:0034765;GO:0005272;GO:0006811;GO:0005216;GO:0005248;GO:0001518;GO:0007422;GO:0033268	nervous system development;membrane;sodium ion transmembrane transport;ATP binding;axon initial segment;cytoplasmic vesicle;ion transmembrane transport;regulation of postsynaptic membrane potential;neuronal action potential;Z disc;membrane depolarization during action potential;protein binding;nucleotide binding;integral component of membrane;sodium ion transport;plasma membrane;myelination;trans…	.	.	.	SCN8A
ENSG00000168803	8.88235	yes	up	0.000151954	yes	chr15	+	43353501	43354500	downstream	NA	NA	ENST00000610420	1.83589	no	up	0.175834	no	GO:0004000;GO:0017144;GO:0009117;GO:0046872;GO:0019239;GO:0016787;GO:0005829;GO:0046103;GO:0043101;GO:0006154	adenosine deaminase activity;drug metabolic process;nucleotide metabolic process;metal ion binding;deaminase activity;hydrolase activity;cytosol;inosine biosynthetic process;purine-containing compound salvage;adenosine catabolic process	.	.	.	ADAL
ENSG00000143127	2.15169	yes	up	0.000743031	yes	chr1	-	145893001	145894000	intron	internal intron	NA	ENST00000369304	0.496803	yes	down	0.176621	no	GO:0016020;GO:0098639;GO:0008305;GO:0007160;GO:0046872;GO:0007155;GO:0005518;GO:0030198;GO:0016021;GO:0007229;GO:0005886;GO:0034680	membrane;collagen binding involved in cell-matrix adhesion;integrin complex;cell-matrix adhesion;metal ion binding;cell adhesion;collagen binding;extracellular matrix organization;integral component of membrane;integrin-mediated signaling pathway;plasma membrane;integrin alpha10-beta1 complex	ko04810;ko05165;ko05412;ko04512;ko05414;ko04151;ko04510;ko05410	Regulation of actin cytoskeleton;Human papillomavirus infection;Arrhythmogenic right ventricular cardiomyopathy (ARVC);ECM-receptor interaction;Dilated cardiomyopathy (DCM);PI3K-Akt signaling pathway;Focal adhesion;Hypertrophic cardiomyopathy (HCM)	Cellular Processes;Human Diseases;Human Diseases;Environmental Information Processing;Human Diseases;Environmental Information Processing;Cellular Processes;Human Diseases	ITGA10
ENSG00000165121	2.01277	yes	up	0.000172103	yes	chr9	+	85837501	85838500	intron	internal intron	NA	ENST00000637846	1.7987	no	up	0.176926	no	.	.	.	.	.	AL353743.1
ENSG00000104691	0.632184	yes	down	0.000184666	yes	chr8	+	30734001	30735000	downstream	NA	NA	ENST00000380154	0.494422	yes	down	0.178444	no	GO:0016020;GO:0005783;GO:0004523;GO:0030433;GO:0003676;GO:0005730;GO:0005515;GO:0030176;GO:0007338;GO:0016021;GO:0090502;GO:0005789	membrane;endoplasmic reticulum;RNA-DNA hybrid ribonuclease activity;ER-associated ubiquitin-dependent protein catabolic process;nucleic acid binding;nucleolus;protein binding;integral component of endoplasmic reticulum membrane;single fertilization;integral component of membrane;RNA phosphodiester bond hydrolysis, endonucleolytic;endoplasmic reticulum membrane	.	.	.	UBXN8
ENSG00000169247	0.184211	yes	down	0.000780027	yes	chr5	-	149025001	149026000	exon	last exon	NA	ENST00000512049	0.497713	yes	down	0.178537	no	GO:0032287;GO:0031410;GO:1901184;GO:0033157;GO:0022011;GO:0055037;GO:0005886	peripheral nervous system myelin maintenance;cytoplasmic vesicle;regulation of ERBB signaling pathway;regulation of intracellular protein transport;myelination in peripheral nervous system;recycling endosome;plasma membrane	.	.	.	SH3TC2
ENSG00000158477	0.243902	yes	down	7.03638e-10	yes	chr1	+	158259501	158260500	downstream	NA	NA	ENST00000289429	1.82742	no	up	0.178845	no	GO:0010008;GO:0016020;GO:0048007;GO:0071723;GO:0005887;GO:0005515;GO:0002376;GO:0016021;GO:0005886;GO:0050776;GO:0030884;GO:0030881;GO:0002250;GO:0005768;GO:0045121;GO:0030883;GO:0006955	endosome membrane;membrane;antigen processing and presentation, exogenous lipid antigen via MHC class Ib;lipopeptide binding;integral component of plasma membrane;protein binding;immune system process;integral component of membrane;plasma membrane;regulation of immune response;exogenous lipid antigen binding;beta-2-microglobulin binding;adaptive immune response;endosome;membrane raft;endogenous l…	ko04530;ko04640	Tight junction;Hematopoietic cell lineage	Cellular Processes;Organismal Systems	CD1A
ENSG00000010310	2.54324	yes	up	0.000148517	yes	chr19	+	45669001	45670000	intron	internal intron	NA	ENST00000590918	0.495656	yes	down	0.179884	no	GO:0016020;GO:0032024;GO:0007166;GO:0038192;GO:0050796;GO:0004930;GO:0009749;GO:0017046;GO:0007584;GO:0016021;GO:0004888;GO:0004871;GO:0030819;GO:0005886;GO:0007186;GO:0007165;GO:0048678;GO:0006091;GO:0031018;GO:0002029;GO:0016519;GO:0051592;GO:0007190;GO:0007204;GO:0070542	membrane;positive regulation of insulin secretion;cell surface receptor signaling pathway;gastric inhibitory peptide signaling pathway;regulation of insulin secretion;G-protein coupled receptor activity;response to glucose;peptide hormone binding;response to nutrient;integral component of membrane;transmembrane signaling receptor activity;signal transducer activity;positive regulation of cAMP bio…	ko04024;ko04080	cAMP signaling pathway;Neuroactive ligand-receptor interaction	Environmental Information Processing;Environmental Information Processing	GIPR
ENSG00000198626	1.72125	yes	up	3.25207e-18	yes	chr1	+	237783001	237784000	exon	internal exon	NA	ENST00000366574	1.78585	no	up	0.183106	no	GO:0010882;GO:0016020;GO:0048763;GO:0003143;GO:0098910;GO:0098904;GO:0005623;GO:0033017;GO:0005513;GO:0097159;GO:0098907;GO:0070062;GO:0043924;GO:0071872;GO:0042802;GO:0030509;GO:0055117;GO:0060402;GO:0060070;GO:0005216;GO:0060401;GO:0014808;GO:0098911;GO:0072599;GO:0051284;GO:0035584;GO:0034237;GO:0071313;GO:0010881;GO:0005516;GO:0006874;GO:0005886;GO:0006810;GO:0010460;GO:1901896;GO:0005509;GO:…	regulation of cardiac muscle contraction by calcium ion signaling;membrane;calcium-induced calcium release activity;embryonic heart tube morphogenesis;regulation of atrial cardiac muscle cell action potential;regulation of AV node cell action potential;cell;sarcoplasmic reticulum membrane;detection of calcium ion;organic cyclic compound binding;regulation of SA node cell action potential;extracel…	ko04371;ko04261;ko05412;ko04972;ko04911;ko05414;ko04921;ko04024;ko04020;ko04260;ko05410;ko04713	Apelin signaling pathway;Adrenergic signaling in cardiomyocytes;Arrhythmogenic right ventricular cardiomyopathy (ARVC);Pancreatic secretion;Insulin secretion;Dilated cardiomyopathy (DCM);Oxytocin signaling pathway;cAMP signaling pathway;Calcium signaling pathway;Cardiac muscle contraction;Hypertrophic cardiomyopathy (HCM);Circadian entrainment	Environmental Information Processing;Organismal Systems;Human Diseases;Organismal Systems;Organismal Systems;Human Diseases;Organismal Systems;Environmental Information Processing;Environmental Information Processing;Organismal Systems;Human Diseases;Organismal Systems	RYR2
ENSG00000050628	1.91444	yes	up	0.00060859	yes	chr1	-	71049501	71050500	promoter	Distal	ICP	ENST00000370924	0.508378	no	down	0.183816	no	GO:0031622;GO:0007200;GO:0016020;GO:0005635;GO:0004930;GO:0005887;GO:0004955;GO:0016021;GO:0004871;GO:0005886;GO:0007186;GO:0004957;GO:0007165;GO:0060455;GO:0008219;GO:0014827	positive regulation of fever generation;phospholipase C-activating G-protein coupled receptor signaling pathway;membrane;nuclear envelope;G-protein coupled receptor activity;integral component of plasma membrane;prostaglandin receptor activity;integral component of membrane;signal transducer activity;plasma membrane;G-protein coupled receptor signaling pathway;prostaglandin E receptor activity;si…	ko05200;ko04024;ko04923;ko04080;ko04020	Pathways in cancer;cAMP signaling pathway;Regulation of lipolysis in adipocytes;Neuroactive ligand-receptor interaction;Calcium signaling pathway	Human Diseases;Environmental Information Processing;Organismal Systems;Environmental Information Processing;Environmental Information Processing	PTGER3
ENSG00000167487	1.61421	yes	up	1.61482e-05	yes	chr19	+	18667001	18668000	downstream	NA	NA	ENST00000300976	1.77873	no	up	0.185475	no	GO:0009566;GO:0016567;GO:0007286;GO:0031463;GO:0005737;GO:0008584;GO:0004842	fertilization;protein ubiquitination;spermatid development;Cul3-RING ubiquitin ligase complex;cytoplasm;male gonad development;ubiquitin-protein transferase activity	.	.	.	KLHL26
ENSG00000170456	0.738404	yes	down	0.000934982	yes	chr12	-	31422001	31423000	downstream	NA	NA	ENST00000389082	0.515159	no	down	0.185621	no	GO:0070588;GO:0016020;GO:0017112;GO:0005085;GO:0043547;GO:0061024;GO:0005829;GO:0050982;GO:0016021;GO:0005262	calcium ion transmembrane transport;membrane;Rab guanyl-nucleotide exchange factor activity;guanyl-nucleotide exchange factor activity;positive regulation of GTPase activity;membrane organization;cytosol;detection of mechanical stimulus;integral component of membrane;calcium channel activity	.	.	.	DENND5B
ENSG00000129993	1.51028	yes	up	0.000204114	yes	chr16	-	88897501	88898500	intron	internal intron	NA	ENST00000268679	0.510541	no	down	0.18645	no	GO:0016020;GO:0003714;GO:0006355;GO:1903715;GO:0032436;GO:0000139;GO:0008283;GO:0005730;GO:0005515;GO:0030851;GO:0003700;GO:0008285;GO:0045892;GO:0005634;GO:0005654;GO:0030154;GO:0006351;GO:0001666;GO:0046872;GO:0005794;GO:0045820	membrane;transcription corepressor activity;regulation of transcription, DNA-templated;regulation of aerobic respiration;positive regulation of proteasomal ubiquitin-dependent protein catabolic process;Golgi membrane;cell proliferation;nucleolus;protein binding;granulocyte differentiation;sequence-specific DNA binding transcription factor activity;negative regulation of cell proliferation;negativ…	.	.	.	CBFA2T3
ENSG00000130821	4.47286	yes	up	7.65118e-10	yes	chrX	+	153688001	153689000	intron	first intron	NA	ENST00000253122	1.75081	no	up	0.186961	no	GO:0016020;GO:0015293;GO:0005887;GO:0006600;GO:0016021;GO:0005309;GO:0005328;GO:0005886;GO:0006814;GO:0006810;GO:0055085;GO:0005308;GO:0006936;GO:0015881;GO:0006811;GO:1902598;GO:0006836	membrane;symporter activity;integral component of plasma membrane;creatine metabolic process;integral component of membrane;creatine:sodium symporter activity;neurotransmitter:sodium symporter activity;plasma membrane;sodium ion transport;transport;transmembrane transport;creatine transmembrane transporter activity;muscle contraction;creatine transport;ion transport;creatine transmembrane transpo…	.	.	.	SLC6A8
ENSG00000111961	1.42508	yes	up	0.000802694	yes	chr6	+	148552501	148553500	downstream	NA	NA	ENST00000367467	1.73978	no	up	0.187344	no	GO:0032947;GO:1900044;GO:0031435;GO:0010595;GO:0043507;GO:0031666;GO:0019901;GO:1900745;GO:0008022;GO:1902498;GO:0043234;GO:1901224;GO:0045766;GO:0000209	protein complex scaffold;regulation of protein K63-linked ubiquitination;mitogen-activated protein kinase kinase kinase binding;positive regulation of endothelial cell migration;positive regulation of JUN kinase activity;positive regulation of lipopolysaccharide-mediated signaling pathway;protein kinase binding;positive regulation of p38MAPK cascade;protein C-terminus binding;regulation of protei…	.	.	.	SASH1
ENSG00000111452	2.19785	yes	up	2.00716e-06	yes	chr12	+	131105501	131106500	intron	internal intron	NA	ENST00000261654	1.7581	no	up	0.189593	no	GO:0007186;GO:0016020;GO:0007165;GO:0007166;GO:0010579;GO:0004930;GO:0016021;GO:0004888;GO:0004871;GO:0005886	G-protein coupled receptor signaling pathway;membrane;signal transduction;cell surface receptor signaling pathway;positive regulation of adenylate cyclase activity involved in G-protein coupled receptor signaling pathway;G-protein coupled receptor activity;integral component of membrane;transmembrane signaling receptor activity;signal transducer activity;plasma membrane	.	.	.	ADGRD1
ENSG00000141698	0.561815	yes	down	0.000146357	yes	chr17	-	41837501	41838500	promoter	Distal	ICP	ENST00000470690	1.75666	no	up	0.19188	no	GO:0043928;GO:0000287;GO:0008253;GO:0005737;GO:0009117;GO:0046872;GO:0016787;GO:0005515;GO:0005829;GO:0000166;GO:0016311	exonucleolytic nuclear-transcribed mRNA catabolic process involved in deadenylation-dependent decay;magnesium ion binding;5'-nucleotidase activity;cytoplasm;nucleotide metabolic process;metal ion binding;hydrolase activity;protein binding;cytosol;nucleotide binding;dephosphorylation	ko00230;ko00760;ko00240	Purine metabolism;Nicotinate and nicotinamide metabolism;Pyrimidine metabolism	Metabolism;Metabolism;Metabolism	NT5C3B
ENSG00000143434	0.577778	yes	down	0.000615428	yes	chr1	-	151145501	151146500	exon	first exon	NA	ENST00000341697	0.502534	no	down	0.192079	no	GO:0007399;GO:0016020;GO:0030154;GO:0005887;GO:0007275;GO:0016021;GO:0005886;GO:0007411	nervous system development;membrane;cell differentiation;integral component of plasma membrane;multicellular organismal development;integral component of membrane;plasma membrane;axon guidance	ko04360	Axon guidance	Organismal Systems	SEMA6C
ENSG00000184305	1.51792	yes	up	8.27897e-05	yes	chr4	+	90692501	90693500	intron	internal intron	NA	ENST00000505073	1.72777	no	up	0.194423	no	.	.	.	.	.	CCSER1
ENSG00000141622	1.53924	yes	up	9.58644e-05	yes	chr18	+	46455501	46456500	downstream	NA	NA	ENST00000269439	0.515789	no	down	0.196616	no	GO:0010259;GO:0030513;GO:0042787;GO:0005737;GO:0016874;GO:0008270;GO:0000209;GO:0005634;GO:0061630;GO:0060384;GO:0008045;GO:0030163;GO:0007409;GO:0035136;GO:0046872;GO:0061061;GO:0043161;GO:0060173;GO:0043234;GO:0016740	multicellular organismal aging;positive regulation of BMP signaling pathway;protein ubiquitination involved in ubiquitin-dependent protein catabolic process;cytoplasm;ligase activity;zinc ion binding;protein polyubiquitination;nucleus;ubiquitin protein ligase activity;innervation;motor neuron axon guidance;protein catabolic process;axonogenesis;forelimb morphogenesis;metal ion binding;muscle stru…	.	.	.	RNF165
ENSG00000154447	1.726	yes	up	0.000119709	yes	chr4	-	169269001	169270000	exon	first exon	NA	ENST00000284637	1.7264	no	up	0.197097	no	GO:0043154;GO:0042995;GO:0016567;GO:0043066;GO:0030027;GO:0005737;GO:0048471;GO:0006915;GO:0046872;GO:2001237;GO:0005515;GO:0005794;GO:0005829;GO:0016740;GO:0046328	negative regulation of cysteine-type endopeptidase activity involved in apoptotic process;cell projection;protein ubiquitination;negative regulation of apoptotic process;lamellipodium;cytoplasm;perinuclear region of cytoplasm;apoptotic process;metal ion binding;negative regulation of extrinsic apoptotic signaling pathway;protein binding;Golgi apparatus;cytosol;transferase activity;regulation of J…	.	.	.	SH3RF1
ENSG00000167123	1.31907	yes	up	0.000103674	yes	chr9	+	128418001	128419000	promoter	Intermediate	LCP	ENST00000372842	0.510174	no	down	0.197972	no	GO:0005788;GO:0006928;GO:0005783;GO:0007155;GO:0007159;GO:0005886	endoplasmic reticulum lumen;cellular component movement;endoplasmic reticulum;cell adhesion;leukocyte cell-cell adhesion;plasma membrane	.	.	.	CERCAM
ENSG00000204576	0.55914	yes	down	0.000694778	yes	chr6	+	30565001	30566000	downstream	NA	NA	ENST00000470703	1.75609	no	up	0.197985	no	GO:0046872;GO:0003723;GO:0005515	metal ion binding;RNA binding;protein binding	.	.	.	PRR3
ENSG00000188868	2.24402	yes	up	5.97727e-07	yes	chr19	-	12332001	12333000	promoter	Proximal	LCP	ENST00000293725	1.7335	no	up	0.198593	no	GO:0003677;GO:0046872;GO:0005634;GO:0006355;GO:0005622;GO:0006351;GO:0003676	DNA binding;metal ion binding;nucleus;regulation of transcription, DNA-templated;intracellular;transcription, DNA-templated;nucleic acid binding	.	.	.	ZNF563
ENSG00000105426	2.75061	yes	up	1.8591e-06	yes	chr19	-	5231501	5232500	intron	internal intron	NA	ENST00000588012	0.523279	no	down	0.198783	no	GO:0016020;GO:0035374;GO:0021766;GO:0031410;GO:0030054;GO:0016791;GO:0021987;GO:0005887;GO:0005515;GO:0016787;GO:0004721;GO:0032687;GO:0008201;GO:0022038;GO:0070062;GO:0014069;GO:0043005;GO:0007155;GO:0042995;GO:0035335;GO:0021510;GO:0034164;GO:0043395;GO:0010977;GO:0030517;GO:0030672;GO:0006470;GO:0016021;GO:0016311;GO:0005886;GO:0045202;GO:0045211;GO:0048671;GO:0021549;GO:0030424;GO:0090557;GO:…	membrane;chondroitin sulfate binding;hippocampus development;cytoplasmic vesicle;cell junction;phosphatase activity;cerebral cortex development;integral component of plasma membrane;protein binding;hydrolase activity;phosphoprotein phosphatase activity;negative regulation of interferon-alpha production;heparin binding;corpus callosum development;extracellular vesicular exosome;postsynaptic densit…	.	.	.	PTPRS
ENSG00000073803	1.61144	yes	up	0.000217513	yes	chr3	+	185427501	185428500	exon	first exon	NA	ENST00000448876	0.509757	no	down	0.198957	no	GO:0016020;GO:0016310;GO:0005524;GO:0005737;GO:0008385;GO:0019901;GO:0005515;GO:0000166;GO:0004672;GO:0000186;GO:0004709;GO:0042802;GO:0016301;GO:0051092;GO:0005622;GO:0006468;GO:0042803;GO:0007254;GO:0046777;GO:0046872;GO:0004674;GO:0016740	membrane;phosphorylation;ATP binding;cytoplasm;IkappaB kinase complex;protein kinase binding;protein binding;nucleotide binding;protein kinase activity;activation of MAPKK activity;MAP kinase kinase kinase activity;identical protein binding;kinase activity;positive regulation of NF-kappaB transcription factor activity;intracellular;protein phosphorylation;protein homodimerization activity;JNK cas…	ko04010	MAPK signaling pathway	Environmental Information Processing	MAP3K13
ENSG00000185684	1.57864	yes	up	0.000444114	yes	chr12	+	132130001	132131000	exon	last exon	NA	ENST00000332441	0.512195	no	down	0.199026	no	.	.	.	.	.	EP400NL
ENSG00000205643	1.56611	yes	up	0.000123704	yes	chr22	-	46252001	46253000	promoter	Distal	HCP	ENST00000314567	1.72273	no	up	0.199245	no	GO:0005515	protein binding	.	.	.	CDPF1
ENSG00000149257	1.39757	yes	up	3.2349e-06	yes	chr11	+	75566001	75567000	downstream	NA	NA	ENST00000533603	0.516053	no	down	0.200614	no	GO:0070062;GO:0005788;GO:0006986;GO:0005783;GO:0005615;GO:0003723;GO:0010951;GO:0004867;GO:0030199;GO:0005793;GO:0005737;GO:0032964;GO:0003433;GO:0005518;GO:0045121;GO:0051082;GO:0051604;GO:0005581	extracellular vesicular exosome;endoplasmic reticulum lumen;response to unfolded protein;endoplasmic reticulum;extracellular space;RNA binding;negative regulation of endopeptidase activity;serine-type endopeptidase inhibitor activity;collagen fibril organization;endoplasmic reticulum-Golgi intermediate compartment;cytoplasm;collagen biosynthetic process;chondrocyte development involved in endocho…	.	.	.	SERPINH1
ENSG00000165259	2	yes	up	1.2727e-05	yes	chrX	-	84467501	84468500	exon	internal exon	NA	ENST00000297977	1.72551	no	up	0.201315	no	GO:0003677;GO:0005634	DNA binding;nucleus	.	.	.	HDX
ENSG00000008311	2.06329	yes	up	3.58843e-05	yes	chr7	-	122092501	122093500	intron	internal intron	NA	ENST00000417368	0.518494	no	down	0.203211	no	GO:0005759;GO:0043231;GO:0047130;GO:0008152;GO:0006091;GO:0051262;GO:0019477;GO:0003824;GO:0055114;GO:0033512;GO:0047131;GO:0006554;GO:0005739;GO:0004753;GO:0019878;GO:0016491	mitochondrial matrix;intracellular membrane-bounded organelle;saccharopine dehydrogenase (NADP+, L-lysine-forming) activity;metabolic process;generation of precursor metabolites and energy;protein tetramerization;L-lysine catabolic process;catalytic activity;oxidation-reduction process;L-lysine catabolic process to acetyl-CoA via saccharopine;saccharopine dehydrogenase (NAD+, L-glutamate-forming)…	ko00310	Lysine degradation	Metabolism	AASS
ENSG00000081052	1.54711	yes	up	0.000926518	yes	chr2	-	227144501	227145500	intron	internal intron	NA	ENST00000396625	0.5268	no	down	0.203428	no	GO:0005605;GO:0005788;GO:0005201;GO:0005587;GO:0032836;GO:0005578;GO:0030198;GO:0005576;GO:0005581;GO:0005604;GO:0030574	basal lamina;endoplasmic reticulum lumen;extracellular matrix structural constituent;collagen type IV trimer;glomerular basement membrane development;proteinaceous extracellular matrix;extracellular matrix organization;extracellular region;collagen trimer;basement membrane;collagen catabolic process	ko05146;ko04974;ko05165;ko04512;ko04926;ko05200;ko05222;ko04933;ko04151;ko04510	Amoebiasis;Protein digestion and absorption;Human papillomavirus infection;ECM-receptor interaction;Relaxin signaling pathway;Pathways in cancer;Small cell lung cancer;AGE-RAGE signaling pathway in diabetic complications;PI3K-Akt signaling pathway;Focal adhesion	Human Diseases;Organismal Systems;Human Diseases;Environmental Information Processing;Organismal Systems;Human Diseases;Human Diseases;Human Diseases;Environmental Information Processing;Cellular Processes	COL4A4
ENSG00000168546	0.639181	yes	down	2.00867e-05	yes	chr8	-	21750501	21751500	intron	internal intron	NA	ENST00000524240	1.74968	no	up	0.206376	no	GO:0007399;GO:0016020;GO:0019898;GO:0043547;GO:0031225;GO:0007169;GO:0035860;GO:0005886;GO:0007411;GO:0000165;GO:0016167;GO:0004872;GO:0005622;GO:0031953;GO:0005088;GO:0033141	nervous system development;membrane;extrinsic component of membrane;positive regulation of GTPase activity;anchored component of membrane;transmembrane receptor protein tyrosine kinase signaling pathway;glial cell-derived neurotrophic factor receptor signaling pathway;plasma membrane;axon guidance;MAPK cascade;glial cell-derived neurotrophic factor receptor activity;receptor activity;intracellula…	.	.	.	GFRA2
ENSG00000225697	1.53991	yes	up	0.000184979	yes	chr3	-	48631501	48632500	intron	last intron	NA	ENST00000489483	0.529872	no	down	0.210021	no	GO:0016323;GO:0016020;GO:0005783;GO:0015562;GO:0016324;GO:0031410;GO:0050892;GO:0031982;GO:0015106;GO:0071346;GO:0006821;GO:0005887;GO:0015724;GO:0015660;GO:0098656;GO:0015297;GO:1902476;GO:0015499;GO:0008272;GO:0070633;GO:0015701;GO:0015797;GO:0019531;GO:0048240;GO:2001150;GO:0051454;GO:0030321;GO:0005452;GO:0031526;GO:0071320;GO:0012506;GO:0042045;GO:0015301;GO:0015116;GO:1902358;GO:0016021;GO:…	basolateral plasma membrane;membrane;endoplasmic reticulum;efflux transmembrane transporter activity;apical plasma membrane;cytoplasmic vesicle;intestinal absorption;vesicle;bicarbonate transmembrane transporter activity;cellular response to interferon-gamma;chloride transport;integral component of plasma membrane;formate transport;formate efflux transmembrane transporter activity;anion transmemb…	ko04978	Mineral absorption	Organismal Systems	SLC26A6
ENSG00000243364	0.749141	yes	down	0.00107362	yes	chr1	+	155071001	155072000	downstream	NA	NA	ENST00000368409	1.73081	no	up	0.212806	no	GO:0016020;GO:0030316;GO:0007267;GO:0048013;GO:0031225;GO:0046875;GO:0005515;GO:0005887;GO:0005576;GO:0046849;GO:0007411;GO:0005886;GO:0005005	membrane;osteoclast differentiation;cell-cell signaling;ephrin receptor signaling pathway;anchored component of membrane;ephrin receptor binding;protein binding;integral component of plasma membrane;extracellular region;bone remodeling;axon guidance;plasma membrane;transmembrane-ephrin receptor activity	ko04360;ko04015;ko04010;ko04014;ko04151	Axon guidance;Rap1 signaling pathway;MAPK signaling pathway;Ras signaling pathway;PI3K-Akt signaling pathway	Organismal Systems;Environmental Information Processing;Environmental Information Processing;Environmental Information Processing;Environmental Information Processing	EFNA4
ENSG00000162591	0.471816	yes	down	0.000705157	yes	chr1	-	3508001	3509000	intron	internal intron	NA	ENST00000356575	0.531056	no	down	0.216445	no	GO:0005515;GO:0005509;GO:0005576	protein binding;calcium ion binding;extracellular region	.	.	.	MEGF6
ENSG00000124613	2.11594	yes	up	0.00028107	yes	chr6	+	27403501	27404500	downstream	NA	NA	ENST00000244576	0.519103	no	down	0.217387	no	GO:0003677;GO:0046872;GO:0005634;GO:0006355;GO:0006351;GO:0003700;GO:0003676	DNA binding;metal ion binding;nucleus;regulation of transcription, DNA-templated;transcription, DNA-templated;sequence-specific DNA binding transcription factor activity;nucleic acid binding	.	.	.	ZNF391
ENSG00000146918	1.57576	yes	up	2.52907e-05	yes	chr7	-	158692501	158693500	intron	first intron	NA	ENST00000356309	0.533833	no	down	0.21882	no	GO:0016020;GO:0030261;GO:0005654;GO:0005634;GO:0000796;GO:0016607;GO:0035064;GO:0051301;GO:0001833;GO:0007049	membrane;chromosome condensation;nucleoplasm;nucleus;condensin complex;nuclear speck;methylated histone binding;cell division;inner cell mass cell proliferation;cell cycle	.	.	.	NCAPG2
ENSG00000175066	1.39695	yes	up	0.000526138	yes	chr3	-	142196001	142197000	downstream	NA	NA	ENST00000460515	0.523812	no	down	0.219695	no	GO:0016310;GO:0019563;GO:0005524;GO:0006641;GO:0004370;GO:0016301;GO:0016773;GO:0006071;GO:0000166;GO:0005975;GO:0016740;GO:0005739;GO:0046167	phosphorylation;glycerol catabolic process;ATP binding;triglyceride metabolic process;glycerol kinase activity;kinase activity;phosphotransferase activity, alcohol group as acceptor;glycerol metabolic process;nucleotide binding;carbohydrate metabolic process;transferase activity;mitochondrion;glycerol-3-phosphate biosynthetic process	.	.	.	GK5
ENSG00000142949	0.67154	yes	down	0.000539232	yes	chr1	+	43621501	43622500	downstream	NA	NA	ENST00000359947	1.71199	no	up	0.219718	no	GO:0016020;GO:0016477;GO:0035335;GO:0016791;GO:0043025;GO:0005887;GO:0016787;GO:0031102;GO:0035373;GO:0004721;GO:0008201;GO:0016021;GO:0006470;GO:0016311;GO:0005886;GO:1900121;GO:0070062;GO:0005001;GO:0004725;GO:0007185;GO:0043005;GO:0007155;GO:0048679;GO:0010975;GO:0032403	membrane;cell migration;peptidyl-tyrosine dephosphorylation;phosphatase activity;neuronal cell body;integral component of plasma membrane;hydrolase activity;neuron projection regeneration;chondroitin sulfate proteoglycan binding;phosphoprotein phosphatase activity;heparin binding;integral component of membrane;protein dephosphorylation;dephosphorylation;plasma membrane;negative regulation of rece…	ko04931;ko04910;ko04514;ko04520	Insulin resistance;Insulin signaling pathway;Cell adhesion molecules (CAMs);Adherens junction	Human Diseases;Organismal Systems;Environmental Information Processing;Cellular Processes	PTPRF
ENSG00000178814	1.59749	yes	up	6.12525e-05	yes	chr8	-	144060501	144061500	exon	first exon	NA	ENST00000618853	1.67599	no	up	0.221157	no	GO:0006749;GO:0016787;GO:0005524;GO:0005829;GO:0000166;GO:0003824;GO:0006750;GO:0017168	glutathione metabolic process;hydrolase activity;ATP binding;cytosol;nucleotide binding;catalytic activity;glutathione biosynthetic process;5-oxoprolinase (ATP-hydrolyzing) activity	ko00480	Glutathione metabolism	Metabolism	OPLAH
ENSG00000114770	1.61924	yes	up	2.53294e-05	yes	chr3	-	184016501	184017500	exon	first exon	NA	ENST00000427120	0.538519	no	down	0.221591	no	GO:0016020;GO:0006810;GO:0055085;GO:0015711;GO:0005524;GO:0042626;GO:0043225;GO:0005887;GO:0000166;GO:0030213;GO:0016021;GO:0008514;GO:0005886;GO:0016887	membrane;transport;transmembrane transport;organic anion transport;ATP binding;ATPase activity, coupled to transmembrane movement of substances;anion transmembrane-transporting ATPase activity;integral component of plasma membrane;nucleotide binding;hyaluronan biosynthetic process;integral component of membrane;organic anion transmembrane transporter activity;plasma membrane;ATPase activity	ko02010;ko01523	ABC transporters;Antifolate resistance	Environmental Information Processing;Human Diseases	ABCC5
ENSG00000183087	0.759619	yes	down	3.16116e-05	yes	chr13	-	113826001	113827000	exon	internal exon	NA	ENST00000480426	1.69606	no	up	0.224353	no	GO:0031100;GO:0007596;GO:0019079;GO:0032715;GO:0043433;GO:0043491;GO:0005737;GO:0006465;GO:0071363;GO:0050711;GO:0032825;GO:0006909;GO:0070062;GO:0007165;GO:0005622;GO:0048146;GO:1900165;GO:2000352;GO:0006915;GO:0071333;GO:0007155;GO:0001764;GO:0018105;GO:0033138;GO:0007167;GO:0046718;GO:0043027;GO:0005245;GO:0030168;GO:0030296;GO:0070168;GO:0005576;GO:2000270;GO:0003104;GO:0050900;GO:2000533;GO:…	organ regeneration;blood coagulation;viral genome replication;negative regulation of interleukin-6 production;negative regulation of sequence-specific DNA binding transcription factor activity;protein kinase B signaling;cytoplasm;signal peptide processing;cellular response to growth factor stimulus;negative regulation of interleukin-1 secretion;positive regulation of natural killer cell different…	ko01521	EGFR tyrosine kinase inhibitor resistance	Human Diseases	GAS6
ENSG00000114735	0.637168	yes	down	0.000170308	yes	chr3	+	50593501	50594500	exon	last exon	NA	ENST00000232854	1.66213	no	up	0.226481	no	GO:0008757;GO:0003677;GO:0008168;GO:0008276;GO:0006479;GO:0006306;GO:0003676;GO:0005515;GO:0008170;GO:0016740;GO:0005739;GO:0032259	S-adenosylmethionine-dependent methyltransferase activity;DNA binding;methyltransferase activity;protein methyltransferase activity;protein methylation;DNA methylation;nucleic acid binding;protein binding;N-methyltransferase activity;transferase activity;mitochondrion;methylation	.	.	.	HEMK1
ENSG00000213754	2.46739	yes	up	0.000781784	yes	chrX	-	64303001	64304000	downstream	NA	NA	ENST00000396110	0.532029	no	down	0.228647	no	.	.	.	.	.	AL356317.1
ENSG00000133687	0.168766	yes	down	0.000774409	yes	chr12	-	29783001	29784000	promoter	Intermediate	HCP	ENST00000551659	1.65892	no	up	0.22891	no	GO:0016020;GO:0006396;GO:0016021;GO:0005739	membrane;RNA processing;integral component of membrane;mitochondrion	.	.	.	TMTC1
ENSG00000000971	1.41006	yes	up	0.000226063	yes	chr1	+	196675001	196676000	exon	internal exon	NA	ENST00000466229	1.66505	no	up	0.230166	no	GO:0070062;GO:0006956;GO:0005615;GO:0072562;GO:0030449;GO:0006957;GO:0043395;GO:0005515;GO:0002376;GO:0008201;GO:0005576;GO:0045087	extracellular vesicular exosome;complement activation;extracellular space;blood microparticle;regulation of complement activation;complement activation, alternative pathway;heparan sulfate proteoglycan binding;protein binding;immune system process;heparin binding;extracellular region;innate immune response	ko05150;ko04610	Staphylococcus aureus infection;Complement and coagulation cascades	Human Diseases;Organismal Systems	CFH
ENSG00000170464	0.352025	yes	down	0.000788258	yes	chr5	-	139439001	139440000	promoter	Intermediate	LCP	ENST00000302060	1.67715	no	up	0.230428	no	GO:0016020;GO:0016021	membrane;integral component of membrane	.	.	.	DNAJC18
ENSG00000185436	0.562902	yes	down	0.000189668	yes	chr1	-	24187501	24188500	promoter	Distal	ICP	ENST00000327575	0.534409	no	down	0.23142	no	GO:0016020;GO:0032002;GO:0004896;GO:0051607;GO:0005515;GO:0034342;GO:0016021;GO:0050691;GO:0019221;GO:0005886;GO:0008285;GO:0002385	membrane;interleukin-28 receptor complex;cytokine receptor activity;defense response to virus;protein binding;response to type III interferon;integral component of membrane;regulation of defense response to virus by host;cytokine-mediated signaling pathway;plasma membrane;negative regulation of cell proliferation;mucosal immune response	ko04060;ko04630	Cytokine-cytokine receptor interaction;Jak-STAT signaling pathway	Environmental Information Processing;Environmental Information Processing	IFNLR1
ENSG00000184371	0.511873	yes	down	0.000705188	yes	chr1	+	109926001	109927000	downstream	NA	NA	ENST00000329608	1.6509	no	up	0.232157	no	GO:0002158;GO:0010744;GO:0043687;GO:0016020;GO:0005615;GO:0008083;GO:0030335;GO:0032270;GO:0030316;GO:1902228;GO:0060444;GO:0045672;GO:0044267;GO:0005515;GO:0060611;GO:0042488;GO:0045651;GO:0038145;GO:0045087;GO:0070062;GO:0005125;GO:0030154;GO:0032946;GO:0010628;GO:0048471;GO:0060763;GO:0005788;GO:0001954;GO:0003006;GO:0005157;GO:0010759;GO:0048873;GO:0010743;GO:0007169;GO:0046579;GO:0002376;GO:…	osteoclast proliferation;positive regulation of macrophage derived foam cell differentiation;post-translational protein modification;membrane;extracellular space;growth factor activity;positive regulation of cell migration;positive regulation of cellular protein metabolic process;osteoclast differentiation;positive regulation of macrophage colony-stimulating factor signaling pathway;branching inv…	ko04015;ko04380;ko04060;ko04010;ko04014;ko04640;ko05323;ko04668;ko04151	Rap1 signaling pathway;Osteoclast differentiation;Cytokine-cytokine receptor interaction;MAPK signaling pathway;Ras signaling pathway;Hematopoietic cell lineage;Rheumatoid arthritis;TNF signaling pathway;PI3K-Akt signaling pathway	Environmental Information Processing;Organismal Systems;Environmental Information Processing;Environmental Information Processing;Environmental Information Processing;Organismal Systems;Human Diseases;Environmental Information Processing;Environmental Information Processing	CSF1
ENSG00000159788	1.19806	yes	up	0.000263051	yes	chr4	+	3415001	3416000	exon	internal exon	NA	ENST00000344733	1.65828	no	up	0.233401	no	GO:0030425;GO:0042995;GO:0009968;GO:0030054;GO:0043547;GO:0005737;GO:0030695;GO:0008277;GO:0005730;GO:0005829;GO:0005886;GO:0045202;GO:0005634;GO:0007165;GO:0005057;GO:0016363;GO:0006351;GO:0050790;GO:0000794;GO:0005096	dendrite;cell projection;negative regulation of signal transduction;cell junction;positive regulation of GTPase activity;cytoplasm;GTPase regulator activity;regulation of G-protein coupled receptor protein signaling pathway;nucleolus;cytosol;plasma membrane;synapse;nucleus;signal transduction;receptor signaling protein activity;nuclear matrix;transcription, DNA-templated;regulation of catalytic a…	.	.	.	RGS12
ENSG00000100417	-inf	yes	down	0.000633704	yes	chr22	-	41589501	41590500	promoter	Intermediate	ICP	ENST00000216259	1.65444	no	up	0.233571	no	GO:0004615;GO:0016853;GO:0005737;GO:0043025;GO:0009298;GO:0006013;GO:0046872;GO:0045047;GO:0005515;GO:0005829;GO:0006487	phosphomannomutase activity;isomerase activity;cytoplasm;neuronal cell body;GDP-mannose biosynthetic process;mannose metabolic process;metal ion binding;protein targeting to ER;protein binding;cytosol;protein N-linked glycosylation	ko00520;ko00051	Amino sugar and nucleotide sugar metabolism;Fructose and mannose metabolism	Metabolism;Metabolism	PMM1
ENSG00000146197	1.58806	yes	up	4.02773e-05	yes	chr6	+	35254001	35255000	downstream	NA	NA	ENST00000274938	0.546311	no	down	0.233764	no	GO:0051291;GO:0005615;GO:0030154;GO:0007165;GO:0051260;GO:0022617;GO:0009986;GO:0005515;GO:0005509;GO:0045880;GO:0005576;GO:0005886	protein heterooligomerization;extracellular space;cell differentiation;signal transduction;protein homooligomerization;extracellular matrix disassembly;cell surface;protein binding;calcium ion binding;positive regulation of smoothened signaling pathway;extracellular region;plasma membrane	.	.	.	SCUBE3
ENSG00000160233	1.66104	yes	up	0.00013111	yes	chr21	+	44460501	44461500	exon	last exon	NA	ENST00000291592	1.68731	no	up	0.233806	no	GO:0016020;GO:0046426;GO:0005737;GO:0006469;GO:0005515;GO:0004860;GO:0016021;GO:0019221	membrane;negative regulation of JAK-STAT cascade;cytoplasm;negative regulation of protein kinase activity;protein binding;protein kinase inhibitor activity;integral component of membrane;cytokine-mediated signaling pathway	.	.	.	LRRC3
ENSG00000161513	1.53153	yes	up	0.000232983	yes	chr17	-	74867001	74868000	promoter	Proximal	LCP	ENST00000293195	1.68385	no	up	0.236666	no	GO:0005759;GO:0008203;GO:0006744;GO:0055114;GO:0070402;GO:0008202;GO:0005515;GO:0016125;GO:0005739;GO:0016491;GO:0006694;GO:0006091;GO:0015039;GO:0006700;GO:0005743;GO:0004324;GO:0006629;GO:0070995	mitochondrial matrix;cholesterol metabolic process;ubiquinone biosynthetic process;oxidation-reduction process;NADPH binding;steroid metabolic process;protein binding;sterol metabolic process;mitochondrion;oxidoreductase activity;steroid biosynthetic process;generation of precursor metabolites and energy;NADPH-adrenodoxin reductase activity;C21-steroid hormone biosynthetic process;mitochondrial i…	.	.	.	FDXR
ENSG00000111602	1.77677	yes	up	0.000422945	yes	chr12	-	56451001	56452000	promoter	Distal	ICP	ENST00000553532	1.63022	no	up	0.237286	no	GO:0030324;GO:0002009;GO:0006260;GO:0006355;GO:0046982;GO:0009628;GO:0072711;GO:0009582;GO:0000122;GO:0005515;GO:0006974;GO:0048754;GO:0007623;GO:0045892;GO:0005634;GO:0005654;GO:0006351;GO:0042803;GO:0000790;GO:0048511;GO:0042752;GO:0044770;GO:0072719;GO:0051301;GO:0007275;GO:2000781;GO:0007049	lung development;morphogenesis of an epithelium;DNA replication;regulation of transcription, DNA-templated;protein heterodimerization activity;response to abiotic stimulus;cellular response to hydroxyurea;detection of abiotic stimulus;negative regulation of transcription from RNA polymerase II promoter;protein binding;cellular response to DNA damage stimulus;branching morphogenesis of an epitheli…	.	.	.	TIMELESS
ENSG00000275395	1.45145	yes	up	2.1792e-05	yes	chr19	-	39924501	39925500	intron	internal intron	NA	ENST00000620799	0.534177	no	down	0.239501	no	.	.	.	.	.	FCGBP
ENSG00000204262	0.252747	yes	down	0.000674716	yes	chr2	-	189110001	189111000	intron	first intron	NA	ENST00000374866	1.66384	no	up	0.24038	no	GO:0005788;GO:0005615;GO:0043588;GO:0030199;GO:0048592;GO:0001503;GO:0005576;GO:0005581;GO:0031012;GO:0005201;GO:0005588;GO:1903225;GO:0005578;GO:0071230;GO:0046872;GO:0030198;GO:0046332;GO:0001501;GO:0030574	endoplasmic reticulum lumen;extracellular space;skin development;collagen fibril organization;eye morphogenesis;ossification;extracellular region;collagen trimer;extracellular matrix;extracellular matrix structural constituent;collagen type V trimer;negative regulation of endodermal cell differentiation;proteinaceous extracellular matrix;cellular response to amino acid stimulus;metal ion binding;…	ko04974	Protein digestion and absorption	Organismal Systems	COL5A2
ENSG00000213071	2	yes	up	0.00053354	yes	chr6	-	160453501	160454500	intron	internal intron	NA	ENST00000454031	0.544194	no	down	0.240545	no	.	.	.	.	.	LPAL2
ENSG00000141026	0.682458	yes	down	0.000456182	yes	chr17	+	17488501	17489500	downstream	NA	NA	ENST00000268711	1.65051	no	up	0.240793	no	GO:0006357;GO:0005634;GO:0005515;GO:0016592;GO:0001104;GO:0006355;GO:0006351	regulation of transcription from RNA polymerase II promoter;nucleus;protein binding;mediator complex;RNA polymerase II transcription cofactor activity;regulation of transcription, DNA-templated;transcription, DNA-templated	.	.	.	MED9
ENSG00000128641	2	yes	up	3.20512e-05	yes	chr2	+	191389501	191390500	intron	internal intron	NA	ENST00000392318	0.538417	no	down	0.242189	no	GO:0030048;GO:0010008;GO:0051015;GO:0005903;GO:0005524;GO:0003774;GO:0071944;GO:0005737;GO:0032588;GO:0007015;GO:0051017;GO:0000166;GO:0005516;GO:0005769;GO:0005886;GO:0070062;GO:0005546;GO:0048471;GO:0045296;GO:0030175;GO:0005884;GO:0003779;GO:0005547;GO:0016459;GO:0006892;GO:0000146;GO:0045177;GO:0030898	actin filament-based movement;endosome membrane;actin filament binding;brush border;ATP binding;motor activity;cell periphery;cytoplasm;trans-Golgi network membrane;actin filament organization;actin filament bundle assembly;nucleotide binding;calmodulin binding;early endosome;plasma membrane;extracellular vesicular exosome;phosphatidylinositol-4,5-bisphosphate binding;perinuclear region of cytopl…	.	.	.	MYO1B
ENSG00000255587	1.91969	yes	up	2.08079e-05	yes	chr6	+	36722501	36723500	intron	internal intron	NA	ENST00000612677	1.61762	no	up	0.242694	no	GO:0016020;GO:0035577;GO:0003924;GO:0005509;GO:0000166;GO:0043312;GO:0035579;GO:0005525;GO:0005886	membrane;azurophil granule membrane;GTPase activity;calcium ion binding;nucleotide binding;neutrophil degranulation;specific granule membrane;GTP binding;plasma membrane	.	.	.	RAB44
ENSG00000144354	1.46411	yes	up	0.000199475	yes	chr2	+	173358001	173359000	intron	internal intron	NA	ENST00000347703	1.627	no	up	0.243154	no	GO:0005654;GO:0005634;GO:0006355;GO:0005829;GO:0042127;GO:0006351;GO:0005737;GO:0006915	nucleoplasm;nucleus;regulation of transcription, DNA-templated;cytosol;regulation of cell proliferation;transcription, DNA-templated;cytoplasm;apoptotic process	.	.	.	CDCA7
ENSG00000181690	1.76721	yes	up	5.62753e-05	yes	chr8	-	56212501	56213500	promoter	Distal	HCP	ENST00000316981	1.61971	no	up	0.2432	no	GO:0060252;GO:0003677;GO:0006355;GO:0001077;GO:0010629;GO:0060736;GO:0003700;GO:0035265;GO:0005634;GO:0000978;GO:0016607;GO:0006351;GO:0010628;GO:0006915;GO:0003676;GO:0006366;GO:0035264;GO:0046872;GO:0045944;GO:0022612	positive regulation of glial cell proliferation;DNA binding;regulation of transcription, DNA-templated;RNA polymerase II core promoter proximal region sequence-specific DNA binding transcription factor activity involved in positive regulation of transcription;negative regulation of gene expression;prostate gland growth;sequence-specific DNA binding transcription factor activity;organ growth;nucle…	.	.	.	PLAG1
ENSG00000137831	0.288538	yes	down	0.000303277	yes	chr15	-	70700001	70701000	promoter	Distal	LCP	ENST00000322954	1.62175	no	up	0.243557	no	GO:0070062;GO:0005856;GO:0005634;GO:0097190;GO:1901222;GO:0005737;GO:0005515;GO:0005829;GO:0005576	extracellular vesicular exosome;cytoskeleton;nucleus;apoptotic signaling pathway;regulation of NIK/NF-kappaB signaling;cytoplasm;protein binding;cytosol;extracellular region	.	.	.	UACA
ENSG00000175564	1.55783	yes	up	0.000512452	yes	chr11	-	74006001	74007000	exon	first exon	NA	ENST00000314032	0.539407	no	down	0.243902	no	GO:0016020;GO:0000303;GO:0006839;GO:0005515;GO:0006631;GO:0007584;GO:0016021;GO:0005739;GO:0051384;GO:0015992;GO:0006810;GO:0007585;GO:0032868;GO:0009409;GO:0014823;GO:0032870;GO:1990542;GO:0001666;GO:0007568;GO:0048545;GO:0017077;GO:0005743;GO:0031966;GO:0006629;GO:0005215	membrane;response to superoxide;mitochondrial transport;protein binding;fatty acid metabolic process;response to nutrient;integral component of membrane;mitochondrion;response to glucocorticoid;proton transport;transport;respiratory gaseous exchange;response to insulin;response to cold;response to activity;cellular response to hormone stimulus;mitochondrial transmembrane transport;response to hyp…	.	.	.	UCP3
ENSG00000197712	2.05	yes	up	0.000123706	yes	chr4	+	38941001	38942000	intron	last intron	NA	ENST00000358869	1.65459	no	up	0.244408	no	GO:0005654;GO:0005634;GO:0005515;GO:0005829;GO:0005794;GO:0005737	nucleoplasm;nucleus;protein binding;cytosol;Golgi apparatus;cytoplasm	.	.	.	FAM114A1
ENSG00000171574	0.386842	yes	down	0.000326889	yes	chr19	+	58419001	58420000	downstream	NA	NA	ENST00000306910	0.547941	no	down	0.246635	no	GO:0003677;GO:0046872;GO:0005634;GO:0006355;GO:0005622;GO:0006351;GO:0003676	DNA binding;metal ion binding;nucleus;regulation of transcription, DNA-templated;intracellular;transcription, DNA-templated;nucleic acid binding	.	.	.	ZNF584
ENSG00000196440	1.81432	yes	up	0.000194785	yes	chrX	+	101486001	101487000	intron	internal intron	NA	ENST00000423738	0.544069	no	down	0.24678	no	GO:0016020;GO:0016021	membrane;integral component of membrane	.	.	.	ARMCX4
ENSG00000157796	1.47437	yes	up	2.10075e-05	yes	chr4	+	39180501	39181500	promoter	Intermediate	ICP	ENST00000399820	1.61882	no	up	0.246846	no	GO:0005929;GO:0042995;GO:0061055;GO:0005737;GO:0035721;GO:0008406;GO:0055123;GO:0060271;GO:0097542;GO:0031514;GO:0035735;GO:0007224;GO:0050877;GO:0005856;GO:0000902;GO:0060831;GO:0005654;GO:0032391;GO:0031076;GO:0030030;GO:0001701;GO:0060830;GO:0001750;GO:0030326;GO:0042471;GO:0048701;GO:0030991	cilium;cell projection;myotome development;cytoplasm;intraciliary retrograde transport;gonad development;digestive system development;cilium morphogenesis;ciliary tip;motile cilium;intraciliary transport involved in cilium morphogenesis;smoothened signaling pathway;neurological system process;cytoskeleton;cell morphogenesis;smoothened signaling pathway involved in dorsal/ventral neural tube patte…	.	.	.	WDR19
ENSG00000260314	0.582305	yes	down	0.000590905	yes	chr10	+	17871501	17872500	intron	internal intron	NA	ENST00000569591	1.67611	no	up	0.247334	no	GO:0010008;GO:0016020;GO:0071222;GO:0071346;GO:0005515;GO:0005887;GO:0006897;GO:0016021;GO:0004888;GO:0071353;GO:0001618;GO:0005886;GO:0007165;GO:0004872;GO:0016032;GO:0005537;GO:0005768;GO:0009986;GO:0030246;GO:0006898;GO:0046718	endosome membrane;membrane;cellular response to lipopolysaccharide;cellular response to interferon-gamma;protein binding;integral component of plasma membrane;endocytosis;integral component of membrane;transmembrane signaling receptor activity;cellular response to interleukin-4;virus receptor activity;plasma membrane;signal transduction;receptor activity;viral process;mannose binding;endosome;cel…	ko05152;ko04145	Tuberculosis;Phagosome	Human Diseases;Cellular Processes	MRC1
ENSG00000131711	1.71713	yes	up	1.84595e-06	yes	chr5	+	72199001	72200000	exon	internal exon	NA	ENST00000296755	1.61315	no	up	0.247902	no	GO:0007399;GO:0048675;GO:0042995;GO:0016358;GO:0005874;GO:0030054;GO:0061162;GO:0005737;GO:0045773;GO:0005875;GO:0005515;GO:0005829;GO:0043197;GO:0005886;GO:0045202;GO:0005856;GO:0000226;GO:0047497;GO:0014069;GO:0001750;GO:0008017;GO:0007409;GO:0032387;GO:0005198;GO:0009987;GO:0001578	nervous system development;axon extension;cell projection;dendrite development;microtubule;cell junction;establishment of monopolar cell polarity;cytoplasm;positive regulation of axon extension;microtubule associated complex;protein binding;cytosol;dendritic spine;plasma membrane;synapse;cytoskeleton;microtubule cytoskeleton organization;mitochondrion transport along microtubule;postsynaptic dens…	.	.	.	MAP1B
ENSG00000141956	0.75569	yes	down	0.000133714	yes	chr21	-	41821501	41822500	intron	internal intron	NA	ENST00000447016	0.557806	no	down	0.25189	no	GO:0003677;GO:0005634;GO:0005654;GO:0006355;GO:0008168;GO:0006351;GO:0003676;GO:0046872;GO:0016604;GO:0016740;GO:0032259	DNA binding;nucleus;nucleoplasm;regulation of transcription, DNA-templated;methyltransferase activity;transcription, DNA-templated;nucleic acid binding;metal ion binding;nuclear body;transferase activity;methylation	.	.	.	PRDM15
ENSG00000163995	1.45837	yes	up	0.000199328	yes	chr4	-	8096501	8097500	intron	internal intron	NA	ENST00000361737	0.544976	no	down	0.252955	no	GO:0003779;GO:0046872;GO:0030036;GO:0015629;GO:0007010;GO:0006351;GO:0005737	actin binding;metal ion binding;actin cytoskeleton organization;actin cytoskeleton;cytoskeleton organization;transcription, DNA-templated;cytoplasm	ko04360	Axon guidance	Organismal Systems	ABLIM2
ENSG00000130396	1.23007	yes	up	1.46439e-05	yes	chr6	+	167962001	167963000	intron	internal intron	NA	ENST00000511637	1.61132	no	up	0.253123	no	GO:0030054;GO:0043547;GO:0005737;GO:0021987;GO:0005913;GO:0005515;GO:0005911;GO:0005829;GO:0070445;GO:0043296;GO:0005886;GO:0048872;GO:0021537;GO:0050839;GO:0005654;GO:0090557;GO:0007165;GO:0048854;GO:0016607;GO:0007267;GO:0060019;GO:0017016;GO:0005912;GO:0045296;GO:0007155;GO:0034332;GO:1902414;GO:0008022;GO:0034334;GO:0032880;GO:0045177;GO:0060563	cell junction;positive regulation of GTPase activity;cytoplasm;cerebral cortex development;cell-cell adherens junction;protein binding;cell-cell junction;cytosol;regulation of oligodendrocyte progenitor proliferation;apical junction complex;plasma membrane;homeostasis of number of cells;telencephalon development;cell adhesion molecule binding;nucleoplasm;establishment of endothelial intestinal ba…	ko04015;ko04024;ko04670;ko04530;ko04014;ko04520	Rap1 signaling pathway;cAMP signaling pathway;Leukocyte transendothelial migration;Tight junction;Ras signaling pathway;Adherens junction	Environmental Information Processing;Environmental Information Processing;Organismal Systems;Cellular Processes;Environmental Information Processing;Cellular Processes	AFDN
ENSG00000137962	0.68306	yes	down	0.000398132	yes	chr1	-	94196501	94197500	promoter	Distal	LCP	ENST00000260526	1.64946	no	up	0.253151	no	GO:0007165;GO:0005622;GO:0043547;GO:0035556;GO:0005737;GO:0007266;GO:0046872;GO:0005829;GO:0030165;GO:0051056;GO:0005096	signal transduction;intracellular;positive regulation of GTPase activity;intracellular signal transduction;cytoplasm;Rho protein signal transduction;metal ion binding;cytosol;PDZ domain binding;regulation of small GTPase mediated signal transduction;GTPase activator activity	.	.	.	ARHGAP29
ENSG00000142303	1.94256	yes	up	0.000131903	yes	chr19	-	8611501	8612500	promoter	Distal	LCP	ENST00000593913	1.63159	no	up	0.254221	no	GO:0031012;GO:0004222;GO:0008233;GO:0005578;GO:0046872;GO:0005515;GO:0008237;GO:0016787;GO:0006508;GO:0001527;GO:0008270;GO:0005576	extracellular matrix;metalloendopeptidase activity;peptidase activity;proteinaceous extracellular matrix;metal ion binding;protein binding;metallopeptidase activity;hydrolase activity;proteolysis;microfibril;zinc ion binding;extracellular region	.	.	.	ADAMTS10
ENSG00000143252	1.51326	yes	up	0.000122302	yes	chr1	+	161373501	161374500	exon	last exon	NA	ENST00000515731	1.6549	no	up	0.255193	no	GO:0009055;GO:0016627;GO:0016020;GO:0020037;GO:0006121;GO:0009060;GO:0055114;GO:0045273;GO:0006099;GO:0005749;GO:0045281;GO:0000104;GO:0046872;GO:0016021;GO:0005743;GO:0005739	electron carrier activity;oxidoreductase activity, acting on the CH-CH group of donors;membrane;heme binding;mitochondrial electron transport, succinate to ubiquinone;aerobic respiration;oxidation-reduction process;respiratory chain complex II;tricarboxylic acid cycle;mitochondrial respiratory chain complex II;succinate dehydrogenase complex;succinate dehydrogenase activity;metal ion binding;inte…	ko05016;ko00020;ko04932;ko00190;ko05010;ko05012	Huntington's disease;Citrate cycle (TCA cycle);Non-alcoholic fatty liver disease (NAFLD);Oxidative phosphorylation;Alzheimer's disease;Parkinson's disease	Human Diseases;Metabolism;Human Diseases;Metabolism;Human Diseases;Human Diseases	SDHC
ENSG00000178498	0.251592	yes	down	5.39212e-08	yes	chr12	+	57610001	57611000	downstream	NA	NA	ENST00000548198	0.559541	no	down	0.25639	no	GO:0046872;GO:0005515;GO:0016567;GO:0007219;GO:0016740;GO:0005737	metal ion binding;protein binding;protein ubiquitination;Notch signaling pathway;transferase activity;cytoplasm	ko04330	Notch signaling pathway	Environmental Information Processing	DTX3
ENSG00000175595	0.523355	yes	down	2.14093e-09	yes	chr16	+	13918501	13919500	promoter	Intermediate	ICP	ENST00000311895	1.59562	no	up	0.256993	no	GO:0000784;GO:0000781;GO:0047485;GO:0006283;GO:0006296;GO:0006295;GO:0006289;GO:0034644;GO:0003697;GO:0016787;GO:0005515;GO:0033683;GO:0006293;GO:0005654;GO:0000712;GO:0005669;GO:0070911;GO:0003684;GO:0008022;GO:1901255;GO:0000724;GO:0004519;GO:0003677;GO:0004520;GO:0036297;GO:0006974;GO:0032205;GO:0009650;GO:0005634;GO:0070522;GO:0006281;GO:0009411;GO:0004518;GO:0000110;GO:0090305;GO:0006303;GO:…	nuclear chromosome, telomeric region;chromosome, telomeric region;protein N-terminus binding;transcription-coupled nucleotide-excision repair;nucleotide-excision repair, DNA incision, 5'-to lesion;nucleotide-excision repair, DNA incision, 3'-to lesion;nucleotide-excision repair;cellular response to UV;single-stranded DNA binding;hydrolase activity;protein binding;nucleotide-excision repair, DNA i…	ko03460;ko03420	Fanconi anemia pathway;Nucleotide excision repair	Genetic Information Processing;Genetic Information Processing	ERCC4
ENSG00000197937	1.78992	yes	up	0.000601866	yes	chr19	-	53135501	53136500	exon	last exon	NA	ENST00000334197	1.61473	no	up	0.260465	no	GO:0003677;GO:0046872;GO:0005634;GO:0006355;GO:0005622;GO:0006351;GO:0003676	DNA binding;metal ion binding;nucleus;regulation of transcription, DNA-templated;intracellular;transcription, DNA-templated;nucleic acid binding	.	.	.	ZNF347
ENSG00000109016	0.408578	yes	down	0.000523328	yes	chr17	+	21169001	21170000	promoter	Distal	LCP	ENST00000581020	0.556636	no	down	0.260667	no	GO:0016020;GO:0005783;GO:0016021;GO:0005789;GO:0055114;GO:0016491	membrane;endoplasmic reticulum;integral component of membrane;endoplasmic reticulum membrane;oxidation-reduction process;oxidoreductase activity	.	.	.	DHRS7B
ENSG00000237649	1.59633	yes	up	1.34626e-05	yes	chr6	+	33398501	33399500	promoter	Intermediate	LCP	ENST00000428849	1.60289	no	up	0.262646	no	GO:0016020;GO:0005874;GO:0005524;GO:0003774;GO:0007283;GO:0005737;GO:0000070;GO:0007080;GO:0000166;GO:0005819;GO:0005769;GO:0005871;GO:0016887;GO:0005856;GO:0005634;GO:0007018;GO:0005815;GO:0008017;GO:0005768;GO:0090307;GO:0051301;GO:0003777;GO:0007049	membrane;microtubule;ATP binding;motor activity;spermatogenesis;cytoplasm;mitotic sister chromatid segregation;mitotic metaphase plate congression;nucleotide binding;spindle;early endosome;kinesin complex;ATPase activity;cytoskeleton;nucleus;microtubule-based movement;microtubule organizing center;microtubule binding;endosome;spindle assembly involved in mitosis;cell division;microtubule motor ac…	.	.	.	KIFC1
ENSG00000118257	1.67483	yes	up	0.00036273	yes	chr2	+	205775501	205776500	exon	last exon	NA	ENST00000360409	1.61709	no	up	0.263621	no	GO:0016020;GO:0019838;GO:0010595;GO:0021828;GO:0017154;GO:0008201;GO:0007411;GO:0061549;GO:0038084;GO:0030154;GO:0001525;GO:0001755;GO:0007507;GO:0097490;GO:1901166;GO:0007155;GO:0001764;GO:0007275;GO:0002116;GO:0021612;GO:0007399;GO:0097491;GO:0021649;GO:0050919;GO:1902285;GO:0061551;GO:0097374;GO:0016021;GO:0005576;GO:0001938;GO:0005886;GO:0036486;GO:1903375;GO:0030424;GO:0019955;GO:0048846;GO:…	membrane;growth factor binding;positive regulation of endothelial cell migration;gonadotrophin-releasing hormone neuronal migration to the hypothalamus;semaphorin receptor activity;heparin binding;axon guidance;sympathetic ganglion development;vascular endothelial growth factor signaling pathway;cell differentiation;angiogenesis;neural crest cell migration;heart development;sympathetic neuron pro…	.	.	.	NRP2
ENSG00000221890	0.576872	yes	down	2.27066e-05	yes	chr22	-	38826001	38827000	intron	internal intron	NA	ENST00000333039	1.59959	no	up	0.264067	no	GO:0016020;GO:0046872;GO:0016021	membrane;metal ion binding;integral component of membrane	.	.	.	NPTXR
ENSG00000118193	1.5438	yes	up	0.000384062	yes	chr1	-	200621501	200622500	promoter	Distal	HCP	ENST00000367350	1.59569	no	up	0.264357	no	GO:2000045;GO:0016020;GO:0051233;GO:0005874;GO:0021766;GO:0031641;GO:0021772;GO:0005737;GO:0019901;GO:0043523;GO:1903429;GO:0007080;GO:0021987;GO:0005515;GO:1903047;GO:0016887;GO:0032467;GO:0001558;GO:0005856;GO:0021693;GO:0034446;GO:0032147;GO:0043524;GO:0043066;GO:0008017;GO:0010389;GO:0003777;GO:0033624;GO:0005524;GO:0021685;GO:0031146;GO:0030496;GO:0015631;GO:0030334;GO:0005829;GO:0000166;GO:…	regulation of G1/S transition of mitotic cell cycle;membrane;spindle midzone;microtubule;hippocampus development;regulation of myelination;olfactory bulb development;cytoplasm;protein kinase binding;regulation of neuron apoptotic process;regulation of cell maturation;mitotic metaphase plate congression;cerebral cortex development;protein binding;mitotic cell cycle process;ATPase activity;positive…	.	.	.	KIF14
ENSG00000103404	2.136	yes	up	1.31639e-05	yes	chr16	-	23090501	23091500	intron	internal intron	NA	ENST00000219689	1.5765	no	up	0.265238	no	GO:0005634;GO:0004843;GO:0008233;GO:0036459;GO:0006511;GO:0016787;GO:0008234;GO:0006508;GO:0016579	nucleus;ubiquitin-specific protease activity;peptidase activity;ubiquitinyl hydrolase activity;ubiquitin-dependent protein catabolic process;hydrolase activity;cysteine-type peptidase activity;proteolysis;protein deubiquitination	.	.	.	USP31
ENSG00000135093	1.55251	yes	up	0.000805432	yes	chr12	+	109067501	109068500	intron	internal intron	NA	ENST00000257548	0.566535	no	down	0.266477	no	GO:0016020;GO:0004843;GO:0008233;GO:0005741;GO:0000422;GO:0008234;GO:0016787;GO:0006511;GO:0016021;GO:0016579;GO:0005739;GO:0044313;GO:0036459;GO:0008053;GO:0006508;GO:0004197;GO:0035871	membrane;ubiquitin-specific protease activity;peptidase activity;mitochondrial outer membrane;mitochondrion degradation;cysteine-type peptidase activity;hydrolase activity;ubiquitin-dependent protein catabolic process;integral component of membrane;protein deubiquitination;mitochondrion;protein K6-linked deubiquitination;ubiquitinyl hydrolase activity;mitochondrial fusion;proteolysis;cysteine-typ…	ko04137	Mitophagy - animal	Cellular Processes	USP30
ENSG00000007376	2.51709	yes	up	1.36216e-06	yes	chr16	-	787501	788500	exon	first exon	NA	ENST00000567114	0.551177	no	down	0.266644	no	GO:0019239;GO:0031119;GO:0003723;GO:0000455;GO:0009451;GO:0001522;GO:0009982	deaminase activity;tRNA pseudouridine synthesis;RNA binding;enzyme-directed rRNA pseudouridine synthesis;RNA modification;pseudouridine synthesis;pseudouridine synthase activity	.	.	.	RPUSD1
ENSG00000133619	0.659508	yes	down	0.000391109	yes	chr7	+	149713501	149714500	promoter	Intermediate	ICP	ENST00000485033	1.59688	no	up	0.267271	no	GO:0006355;GO:0005622;GO:0003676	regulation of transcription, DNA-templated;intracellular;nucleic acid binding	.	.	.	KRBA1
ENSG00000275395	1.45145	yes	up	2.1792e-05	yes	chr19	-	39924501	39925500	intron	internal intron	NA	ENST00000641975	1.58561	no	up	0.270222	no	.	.	.	.	.	FCGBP
ENSG00000183087	0.759619	yes	down	3.16116e-05	yes	chr13	-	113826001	113827000	exon	internal exon	NA	ENST00000327773	1.59711	no	up	0.270745	no	GO:0031100;GO:0007596;GO:0019079;GO:0032715;GO:0043433;GO:0043491;GO:0005737;GO:0006465;GO:0071363;GO:0050711;GO:0032825;GO:0006909;GO:0070062;GO:0007165;GO:0005622;GO:0048146;GO:1900165;GO:2000352;GO:0006915;GO:0071333;GO:0007155;GO:0001764;GO:0018105;GO:0033138;GO:0007167;GO:0046718;GO:0043027;GO:0005245;GO:0030168;GO:0030296;GO:0070168;GO:0005576;GO:2000270;GO:0003104;GO:0050900;GO:2000533;GO:…	organ regeneration;blood coagulation;viral genome replication;negative regulation of interleukin-6 production;negative regulation of sequence-specific DNA binding transcription factor activity;protein kinase B signaling;cytoplasm;signal peptide processing;cellular response to growth factor stimulus;negative regulation of interleukin-1 secretion;positive regulation of natural killer cell different…	ko01521	EGFR tyrosine kinase inhibitor resistance	Human Diseases	GAS6
ENSG00000144935	1.55521	yes	up	0.000107323	yes	chr3	+	142806001	142807000	exon	last exon	NA	ENST00000476941	0.559567	no	down	0.271148	no	GO:0070588;GO:0016020;GO:0051480;GO:0043235;GO:0042438;GO:0015279;GO:0005887;GO:0005515;GO:0016021;GO:0006828;GO:0005886;GO:0006810;GO:0055085;GO:0006816;GO:0051281;GO:0006811;GO:0070679;GO:0005261;GO:0051592;GO:0005216;GO:0005262	calcium ion transmembrane transport;membrane;cytosolic calcium ion homeostasis;receptor complex;melanin biosynthetic process;store-operated calcium channel activity;integral component of plasma membrane;protein binding;integral component of membrane;manganese ion transport;plasma membrane;transport;transmembrane transport;calcium ion transport;positive regulation of release of sequestered calcium…	ko04360;ko04726;ko04724;ko04972	Axon guidance;Serotonergic synapse;Glutamatergic synapse;Pancreatic secretion	Organismal Systems;Organismal Systems;Organismal Systems;Organismal Systems	TRPC1
ENSG00000151320	1.59579	yes	up	9.64217e-06	yes	chr14	+	32773501	32774500	downstream	NA	NA	ENST00000280979	0.561933	no	down	0.271699	no	GO:0016020;GO:0051018;GO:0014701;GO:0005737;GO:0005515;GO:1902261;GO:0014704;GO:0071345;GO:0030315;GO:0006605;GO:0032947;GO:0031965;GO:0019933;GO:0048471;GO:0001508;GO:0061051;GO:0005635;GO:1901381;GO:0035556;GO:0030307;GO:0034237;GO:0071320;GO:0016529;GO:0010880;GO:0005901;GO:0060316;GO:0034704;GO:0070886;GO:0030818;GO:0043495;GO:0010738;GO:0005634;GO:0032516;GO:0051281;GO:0008179;GO:0044325;GO:…	membrane;protein kinase A binding;junctional sarcoplasmic reticulum membrane;cytoplasm;protein binding;positive regulation of delayed rectifier potassium channel activity;intercalated disc;cellular response to cytokine stimulus;T-tubule;protein targeting;protein complex scaffold;nuclear membrane;cAMP-mediated signaling;perinuclear region of cytoplasm;action potential;positive regulation of cell g…	.	.	.	AKAP6
ENSG00000152952	1.96923	yes	up	0.000121427	yes	chr3	-	146161001	146162000	promoter	Distal	ICP	ENST00000360060	0.563868	no	down	0.274237	no	GO:0016020;GO:0005783;GO:0030867;GO:0017185;GO:0005506;GO:0031418;GO:0055114;GO:0016705;GO:0016491;GO:0070062;GO:0046947;GO:0008475;GO:0051213;GO:0001666;GO:0046872;GO:0006464;GO:0005789	membrane;endoplasmic reticulum;rough endoplasmic reticulum membrane;peptidyl-lysine hydroxylation;iron ion binding;L-ascorbic acid binding;oxidation-reduction process;oxidoreductase activity, acting on paired donors, with incorporation or reduction of molecular oxygen;oxidoreductase activity;extracellular vesicular exosome;hydroxylysine biosynthetic process;procollagen-lysine 5-dioxygenase activi…	ko00310	Lysine degradation	Metabolism	PLOD2
ENSG00000123178	0.588601	yes	down	1.36194e-06	yes	chr13	-	49912001	49913000	exon	last exon	NA	ENST00000361840	1.60946	no	up	0.275622	no	GO:0005515	protein binding	.	.	.	SPRYD7
ENSG00000111196	1.39736	yes	up	0.000727732	yes	chr12	-	10603001	10604000	downstream	NA	NA	ENST00000544850	0.569269	no	down	0.279922	no	GO:0006406;GO:0003723;GO:0031124;GO:0006369;GO:0006405;GO:0051028;GO:0043025;GO:0005515;GO:0006397;GO:0006810;GO:0005634;GO:0005654;GO:0000398;GO:0000184;GO:0071013;GO:0035145;GO:0008380	mRNA export from nucleus;RNA binding;mRNA 3'-end processing;termination of RNA polymerase II transcription;RNA export from nucleus;mRNA transport;neuronal cell body;protein binding;mRNA processing;transport;nucleus;nucleoplasm;mRNA splicing, via spliceosome;nuclear-transcribed mRNA catabolic process, nonsense-mediated decay;catalytic step 2 spliceosome;exon-exon junction complex;RNA splicing	ko03040;ko03015;ko03013	Spliceosome;mRNA surveillance pathway;RNA transport	Genetic Information Processing;Genetic Information Processing;Genetic Information Processing	MAGOHB
ENSG00000101004	1.56621	yes	up	9.29944e-05	yes	chr20	-	25587001	25588000	promoter	Distal	ICP	ENST00000278886	0.572799	no	down	0.280746	no	GO:0005856;GO:0005815;GO:0005874;GO:0005737;GO:0045171;GO:0046872;GO:0010389;GO:0005515;GO:0005829;GO:0005509;GO:0000086	cytoskeleton;microtubule organizing center;microtubule;cytoplasm;intercellular bridge;metal ion binding;regulation of G2/M transition of mitotic cell cycle;protein binding;cytosol;calcium ion binding;G2/M transition of mitotic cell cycle	.	.	.	NINL
ENSG00000167393	0.181416	yes	down	5.31113e-09	yes	chrX	-	373001	374000	exon	first exon	NA	ENST00000445792	1.62035	no	up	0.281521	no	GO:0005654;GO:0005634;GO:0019888;GO:0007050;GO:0004722;GO:0050790;GO:0046872;GO:0005515;GO:0004721;GO:0005509;GO:0006470;GO:0000159	nucleoplasm;nucleus;protein phosphatase regulator activity;cell cycle arrest;protein serine/threonine phosphatase activity;regulation of catalytic activity;metal ion binding;protein binding;phosphoprotein phosphatase activity;calcium ion binding;protein dephosphorylation;protein phosphatase type 2A complex	ko04261;ko04152;ko05165;ko04728;ko04151;ko03015;ko04071	Adrenergic signaling in cardiomyocytes;AMPK signaling pathway;Human papillomavirus infection;Dopaminergic synapse;PI3K-Akt signaling pathway;mRNA surveillance pathway;Sphingolipid signaling pathway	Organismal Systems;Environmental Information Processing;Human Diseases;Organismal Systems;Environmental Information Processing;Genetic Information Processing;Environmental Information Processing	PPP2R3B
ENSG00000007541	0.488978	yes	down	5.74983e-07	yes	chr16	+	583001	584000	downstream	NA	NA	ENST00000026218	1.56566	no	up	0.283986	no	GO:0006506;GO:0016020;GO:0017176;GO:0000506;GO:0016757;GO:0016021;GO:0005975;GO:0016740;GO:0005789;GO:0016254	GPI anchor biosynthetic process;membrane;phosphatidylinositol N-acetylglucosaminyltransferase activity;glycosylphosphatidylinositol-N-acetylglucosaminyltransferase (GPI-GnT) complex;transferase activity, transferring glycosyl groups;integral component of membrane;carbohydrate metabolic process;transferase activity;endoplasmic reticulum membrane;preassembly of GPI anchor in ER membrane	ko00563	Glycosylphosphatidylinositol (GPI)-anchor biosynthesis	Metabolism	PIGQ
ENSG00000204580	0.334504	yes	down	3.20672e-23	yes	chr6	+	30899001	30900000	downstream	NA	NA	ENST00000376567	1.58792	no	up	0.285197	no	GO:0016020;GO:0001952;GO:0005615;GO:0016310;GO:0014909;GO:0060444;GO:0007566;GO:0004713;GO:1990138;GO:0005515;GO:0005887;GO:0004672;GO:0008285;GO:0004714;GO:0001558;GO:0070062;GO:0007565;GO:0016301;GO:0010715;GO:0006468;GO:0046777;GO:0007155;GO:0061302;GO:0005518;GO:0030198;GO:0016740;GO:0007595;GO:0005524;GO:0038083;GO:0043235;GO:0007169;GO:0000166;GO:0016021;GO:0005576;GO:0005886;GO:0044319;GO:…	membrane;regulation of cell-matrix adhesion;extracellular space;phosphorylation;smooth muscle cell migration;branching involved in mammary gland duct morphogenesis;embryo implantation;protein tyrosine kinase activity;neuron projection extension;protein binding;integral component of plasma membrane;protein kinase activity;negative regulation of cell proliferation;transmembrane receptor protein tyr…	.	.	.	DDR1
ENSG00000124507	3.84293	yes	up	3.52125e-06	yes	chr6	+	34515001	34516000	intron	first intron	NA	ENST00000620693	0.57595	no	down	0.288481	no	GO:0016020;GO:0016310;GO:0031410;GO:0030054;GO:0030137;GO:0032587;GO:0005737;GO:0048666;GO:0090002;GO:0007015;GO:0005515;GO:0043679;GO:1900006;GO:0045806;GO:0008092;GO:0016301;GO:0043209;GO:0043005;GO:0048471;GO:0005768;GO:0008289;GO:0042995;GO:0030100;GO:0072657;GO:0048812;GO:0005829;GO:0006897;GO:0005886;GO:0045202;GO:0030659;GO:0048488;GO:0005543;GO:0097320	membrane;phosphorylation;cytoplasmic vesicle;cell junction;COPI-coated vesicle;ruffle membrane;cytoplasm;neuron development;establishment of protein localization to plasma membrane;actin filament organization;protein binding;axon terminus;positive regulation of dendrite development;negative regulation of endocytosis;cytoskeletal protein binding;kinase activity;myelin sheath;neuron projection;peri…	.	.	.	PACSIN1
ENSG00000168487	2.37611	yes	up	5.85519e-11	yes	chr8	+	22169501	22170500	intron	first intron	NA	ENST00000306385	1.57351	no	up	0.291063	no	GO:0005615;GO:0008083;GO:0004222;GO:0008233;GO:0051216;GO:0031982;GO:0001503;GO:0008237;GO:0016787;GO:0005515;GO:0001502;GO:0005576;GO:0008270;GO:0004252;GO:0061036;GO:0005125;GO:0030154;GO:0034380;GO:0005578;GO:0022617;GO:0046872;GO:0006508;GO:0005794;GO:0005509;GO:0007275;GO:0001501	extracellular space;growth factor activity;metalloendopeptidase activity;peptidase activity;cartilage development;vesicle;ossification;metallopeptidase activity;hydrolase activity;protein binding;cartilage condensation;extracellular region;zinc ion binding;serine-type endopeptidase activity;positive regulation of cartilage development;cytokine activity;cell differentiation;high-density lipoprotei…	.	.	.	BMP1
ENSG00000144451	0.333333	yes	down	0.000186213	yes	chr2	+	214239001	214240000	exon	last exon	NA	ENST00000432529	0.566609	no	down	0.291457	no	GO:0060294;GO:0005929;GO:0005856;GO:0005634;GO:0051012;GO:0042995;GO:0097231;GO:0030030;GO:0005737;GO:0060271;GO:0007288;GO:0035082;GO:0031514;GO:0005930	cilium movement involved in cell motility;cilium;cytoskeleton;nucleus;microtubule sliding;cell projection;cell motility in response to calcium ion;cell projection organization;cytoplasm;cilium morphogenesis;sperm axoneme assembly;axoneme assembly;motile cilium;axoneme	.	.	.	SPAG16
ENSG00000154928	1.9557	yes	up	2.21731e-06	yes	chr3	+	135130001	135131000	promoter	Distal	LCP	ENST00000398015	0.572333	no	down	0.29526	no	GO:0031290;GO:0030425;GO:0016020;GO:0016310;GO:0005783;GO:0005737;GO:0051965;GO:0022008;GO:0060997;GO:0004713;GO:0005515;GO:0005887;GO:0060326;GO:0004672;GO:0007411;GO:0021631;GO:0004714;GO:0070062;GO:0061351;GO:0001525;GO:0070372;GO:0016301;GO:0006468;GO:0048013;GO:1902723;GO:0008046;GO:0046777;GO:0030010;GO:0005768;GO:0031901;GO:0007155;GO:0045121;GO:1902725;GO:0005003;GO:0016740;GO:1901214;GO:…	retinal ganglion cell axon guidance;dendrite;membrane;phosphorylation;endoplasmic reticulum;cytoplasm;positive regulation of synapse assembly;neurogenesis;dendritic spine morphogenesis;protein tyrosine kinase activity;protein binding;integral component of plasma membrane;cell chemotaxis;protein kinase activity;axon guidance;optic nerve morphogenesis;transmembrane receptor protein tyrosine kinase …	ko04360	Axon guidance	Organismal Systems	EPHB1
ENSG00000019991	0.584833	yes	down	2.87618e-05	yes	chr7	-	81750501	81751500	downstream	NA	NA	ENST00000222390	1.53379	no	up	0.2962	no	GO:0031100;GO:0050731;GO:0016020;GO:0043154;GO:0005615;GO:0008083;GO:0030335;GO:0032715;GO:0050728;GO:0090201;GO:0048012;GO:0046854;GO:0004713;GO:0002576;GO:0070572;GO:0005515;GO:0060326;GO:1902947;GO:0045766;GO:0031643;GO:0001837;GO:0033137;GO:0035729;GO:0014066;GO:0014068;GO:0043066;GO:0046934;GO:0045944;GO:0048015;GO:0030212;GO:0050918;GO:0032733;GO:0000278;GO:1900744;GO:1901299;GO:0046982;GO:…	organ regeneration;positive regulation of peptidyl-tyrosine phosphorylation;membrane;negative regulation of cysteine-type endopeptidase activity involved in apoptotic process;extracellular space;growth factor activity;positive regulation of cell migration;negative regulation of interleukin-6 production;negative regulation of inflammatory response;negative regulation of release of cytochrome c fro…	ko04015;ko04060;ko04010;ko04014;ko05225;ko05211;ko05218;ko01521;ko05200;ko05144;ko05205;ko04151;ko04510;ko05226	Rap1 signaling pathway;Cytokine-cytokine receptor interaction;MAPK signaling pathway;Ras signaling pathway;Hepatocellular carcinoma;Renal cell carcinoma;Melanoma;EGFR tyrosine kinase inhibitor resistance;Pathways in cancer;Malaria;Proteoglycans in cancer;PI3K-Akt signaling pathway;Focal adhesion;Gastric cancer	Environmental Information Processing;Environmental Information Processing;Environmental Information Processing;Environmental Information Processing;Human Diseases;Human Diseases;Human Diseases;Human Diseases;Human Diseases;Human Diseases;Human Diseases;Environmental Information Processing;Cellular Processes;Human Diseases	HGF
ENSG00000136636	2.34807	yes	up	9.26379e-05	yes	chr1	+	215573501	215574500	intron	internal intron	NA	ENST00000259154	1.53023	no	up	0.297213	no	GO:0051260	protein homooligomerization	.	.	.	KCTD3
ENSG00000143995	0.117871	yes	down	8.71624e-07	yes	chr2	+	66575001	66576000	downstream	NA	NA	ENST00000272369	0.579449	no	down	0.297618	no	GO:0060044;GO:0003677;GO:0002089;GO:0006355;GO:0046982;GO:0045638;GO:0001077;GO:0003705;GO:0005515;GO:0005667;GO:0060216;GO:0003682;GO:0043565;GO:0030097;GO:0005634;GO:0000978;GO:0001525;GO:0035855;GO:0006351;GO:0006366;GO:0045665;GO:0007626;GO:0048514;GO:0045944;GO:0007275	negative regulation of cardiac muscle cell proliferation;DNA binding;lens morphogenesis in camera-type eye;regulation of transcription, DNA-templated;protein heterodimerization activity;negative regulation of myeloid cell differentiation;RNA polymerase II core promoter proximal region sequence-specific DNA binding transcription factor activity involved in positive regulation of transcription;RNA …	ko05202;ko04550	Transcriptional misregulation in cancer;Signaling pathways regulating pluripotency of stem cells	Human Diseases;Cellular Processes	MEIS1
ENSG00000124374	1.61823	yes	up	0.000278136	yes	chr2	-	71187501	71188500	exon	last exon	NA	ENST00000244221	0.5858	no	down	0.299653	no	GO:0045947;GO:0000900;GO:0005515;GO:0005737;GO:0006417	negative regulation of translational initiation;translation repressor activity, nucleic acid binding;protein binding;cytoplasm;regulation of translation	.	.	.	PAIP2B
ENSG00000168778	1.29896	yes	up	0.000510095	yes	chr12	+	123687501	123688500	intron	internal intron	NA	ENST00000426174	0.577659	no	down	0.299991	no	GO:0060170;GO:0005856;GO:0016020;GO:0042995;GO:0030030;GO:0005737;GO:0060271;GO:0016021;GO:0036038;GO:0007224	ciliary membrane;cytoskeleton;membrane;cell projection;cell projection organization;cytoplasm;cilium morphogenesis;integral component of membrane;TCTN-B9D complex;smoothened signaling pathway	.	.	.	TCTN2
ENSG00000159788	1.19806	yes	up	0.000263051	yes	chr4	+	3415001	3416000	exon	internal exon	NA	ENST00000382788	0.574966	no	down	0.300669	no	GO:0030425;GO:0042995;GO:0009968;GO:0030054;GO:0043547;GO:0005737;GO:0030695;GO:0008277;GO:0005730;GO:0005829;GO:0005886;GO:0045202;GO:0005634;GO:0007165;GO:0005057;GO:0016363;GO:0006351;GO:0050790;GO:0000794;GO:0005096	dendrite;cell projection;negative regulation of signal transduction;cell junction;positive regulation of GTPase activity;cytoplasm;GTPase regulator activity;regulation of G-protein coupled receptor protein signaling pathway;nucleolus;cytosol;plasma membrane;synapse;nucleus;signal transduction;receptor signaling protein activity;nuclear matrix;transcription, DNA-templated;regulation of catalytic a…	.	.	.	RGS12
ENSG00000171798	0.766611	yes	down	9.18647e-05	yes	chr10	+	133212001	133213000	intron	internal intron	NA	ENST00000304613	1.54345	no	up	0.301742	no	GO:0030425;GO:0042995;GO:0005085;GO:0043547;GO:0021707;GO:0043025;GO:0043204;GO:0050773;GO:0005088;GO:0007264;GO:0001934;GO:0048814;GO:0032045	dendrite;cell projection;guanyl-nucleotide exchange factor activity;positive regulation of GTPase activity;cerebellar granule cell differentiation;neuronal cell body;perikaryon;regulation of dendrite development;Ras guanyl-nucleotide exchange factor activity;small GTPase mediated signal transduction;positive regulation of protein phosphorylation;regulation of dendrite morphogenesis;guanyl-nucleot…	.	.	.	KNDC1
ENSG00000154856	1.85034	yes	up	5.52668e-06	yes	chr18	+	10485501	10486500	intron	last intron	NA	ENST00000355285	1.54553	no	up	0.301762	no	GO:0016020;GO:0030178;GO:0017147;GO:0043615;GO:0005887;GO:0016021;GO:0016055;GO:0005886;GO:0001942	membrane;negative regulation of Wnt signaling pathway;Wnt-protein binding;astrocyte cell migration;integral component of plasma membrane;integral component of membrane;Wnt signaling pathway;plasma membrane;hair follicle development	.	.	.	APCDD1
ENSG00000011028	0.653333	yes	down	2.69384e-05	yes	chr17	+	62680501	62681500	exon	first exon	NA	ENST00000303375	1.53451	no	up	0.302907	no	GO:0016020;GO:0001649;GO:0007165;GO:0005925;GO:0030246;GO:0005518;GO:0005887;GO:0005515;GO:0006897;GO:0016021;GO:0004888;GO:0030574	membrane;osteoblast differentiation;signal transduction;focal adhesion;carbohydrate binding;collagen binding;integral component of plasma membrane;protein binding;endocytosis;integral component of membrane;transmembrane signaling receptor activity;collagen catabolic process	ko05152;ko04145	Tuberculosis;Phagosome	Human Diseases;Cellular Processes	MRC2
ENSG00000185189	0.263934	yes	down	8.99982e-05	yes	chr8	-	143840001	143841000	exon	first exon	NA	ENST00000529747	1.55548	no	up	0.302973	no	GO:0007399;GO:0030182;GO:0005524;GO:0043524;GO:0006468;GO:0035556;GO:0005737;GO:0012505;GO:0004674;GO:0004672;GO:0005829;GO:0006888;GO:0016242	nervous system development;neuron differentiation;ATP binding;negative regulation of neuron apoptotic process;protein phosphorylation;intracellular signal transduction;cytoplasm;endomembrane system;protein serine/threonine kinase activity;protein kinase activity;cytosol;ER to Golgi vesicle-mediated transport;negative regulation of macroautophagy	.	.	.	NRBP2
ENSG00000145949	0.418033	yes	down	0.00101148	yes	chr6	-	2751501	2752500	promoter	Distal	LCP	ENST00000274643	0.573599	no	down	0.30303	no	GO:0070062;GO:0016310;GO:0005524;GO:0016301;GO:0005622;GO:0006468;GO:0035556;GO:0018107;GO:0018105;GO:0004674;GO:0000166;GO:0004672;GO:0004687;GO:0016740	extracellular vesicular exosome;phosphorylation;ATP binding;kinase activity;intracellular;protein phosphorylation;intracellular signal transduction;peptidyl-threonine phosphorylation;peptidyl-serine phosphorylation;protein serine/threonine kinase activity;nucleotide binding;protein kinase activity;myosin light chain kinase activity;transferase activity	ko04611;ko04371;ko04810;ko04022;ko04971;ko04921;ko04270;ko04020;ko04510	Platelet activation;Apelin signaling pathway;Regulation of actin cytoskeleton;cGMP-PKG signaling pathway;Gastric acid secretion;Oxytocin signaling pathway;Vascular smooth muscle contraction;Calcium signaling pathway;Focal adhesion	Organismal Systems;Environmental Information Processing;Cellular Processes;Environmental Information Processing;Organismal Systems;Organismal Systems;Organismal Systems;Environmental Information Processing;Cellular Processes	MYLK4
ENSG00000064225	0.504472	yes	down	0.000177164	yes	chr3	+	98792001	98793000	downstream	NA	NA	ENST00000477899	1.5643	no	up	0.303382	no	GO:0016020;GO:0006486;GO:0097503;GO:0000139;GO:0006664;GO:0003836;GO:0071354;GO:0008373;GO:0016021;GO:0070062;GO:0018279;GO:0052798;GO:0018146;GO:0016757;GO:0006464;GO:0005794;GO:0009311;GO:0016740	membrane;protein glycosylation;sialylation;Golgi membrane;glycolipid metabolic process;beta-galactoside (CMP) alpha-2,3-sialyltransferase activity;cellular response to interleukin-6;sialyltransferase activity;integral component of membrane;extracellular vesicular exosome;protein N-linked glycosylation via asparagine;beta-galactoside alpha-2,3-sialyltransferase activity;keratan sulfate biosyntheti…	ko00601	Glycosphingolipid biosynthesis - lacto and neolacto series	Metabolism	ST3GAL6
ENSG00000225614	0.51479	yes	down	8.26614e-06	yes	chr16	+	88429501	88430500	exon	first exon	NA	ENST00000565624	0.588342	no	down	0.303968	no	GO:0003677;GO:0046872;GO:0005634;GO:0006355;GO:0006351;GO:0003676	DNA binding;metal ion binding;nucleus;regulation of transcription, DNA-templated;transcription, DNA-templated;nucleic acid binding	.	.	.	ZNF469
ENSG00000157796	1.47437	yes	up	2.10075e-05	yes	chr4	+	39180501	39181500	promoter	Intermediate	ICP	ENST00000506869	1.52266	no	up	0.30401	no	GO:0005929;GO:0042995;GO:0061055;GO:0005737;GO:0035721;GO:0008406;GO:0055123;GO:0060271;GO:0097542;GO:0031514;GO:0035735;GO:0007224;GO:0050877;GO:0005856;GO:0000902;GO:0060831;GO:0005654;GO:0032391;GO:0031076;GO:0030030;GO:0001701;GO:0060830;GO:0001750;GO:0030326;GO:0042471;GO:0048701;GO:0030991	cilium;cell projection;myotome development;cytoplasm;intraciliary retrograde transport;gonad development;digestive system development;cilium morphogenesis;ciliary tip;motile cilium;intraciliary transport involved in cilium morphogenesis;smoothened signaling pathway;neurological system process;cytoskeleton;cell morphogenesis;smoothened signaling pathway involved in dorsal/ventral neural tube patte…	.	.	.	WDR19
ENSG00000116016	0.495238	yes	down	0.000389937	yes	chr2	+	46362501	46363500	downstream	NA	NA	ENST00000263734	1.52736	no	up	0.304885	no	GO:0043687;GO:0000981;GO:0007601;GO:0001077;GO:0035019;GO:0005737;GO:0046983;GO:0001892;GO:0055072;GO:0005515;GO:0048625;GO:0042415;GO:0003700;GO:0005654;GO:0001525;GO:0007165;GO:0030154;GO:0016607;GO:0007005;GO:0001666;GO:0048469;GO:0006979;GO:0001974;GO:0007275;GO:0045944;GO:0043129;GO:0030324;GO:0071456;GO:0003677;GO:0006355;GO:0016567;GO:0046982;GO:0043619;GO:0005667;GO:0005829;GO:0061418;GO:…	post-translational protein modification;sequence-specific DNA binding RNA polymerase II transcription factor activity;visual perception;RNA polymerase II core promoter proximal region sequence-specific DNA binding transcription factor activity involved in positive regulation of transcription;somatic stem cell maintenance;cytoplasm;protein dimerization activity;embryonic placenta development;iron …	ko05200;ko05211	Pathways in cancer;Renal cell carcinoma	Human Diseases;Human Diseases	EPAS1
ENSG00000119927	2.11304	yes	up	0.000417942	yes	chr10	-	112180001	112181000	intron	last intron	NA	ENST00000369425	1.56128	no	up	0.30501	no	GO:0016020;GO:0006654;GO:0008654;GO:0044255;GO:0070236;GO:0009749;GO:0019432;GO:0042104;GO:0055091;GO:0016746;GO:0008152;GO:0016024;GO:0006650;GO:0004366;GO:0005743;GO:0016740;GO:0006629;GO:0008374;GO:0005741;GO:0045540;GO:0050707;GO:0055089;GO:0006631;GO:0016021;GO:0005739;GO:0005886;GO:0006637;GO:0006641;GO:0051607;GO:0070970;GO:0033146;GO:0040018;GO:0031966	membrane;phosphatidic acid biosynthetic process;phospholipid biosynthetic process;cellular lipid metabolic process;negative regulation of activation-induced cell death of T cells;response to glucose;triglyceride biosynthetic process;positive regulation of activated T cell proliferation;phospholipid homeostasis;transferase activity, transferring acyl groups;metabolic process;CDP-diacylglycerol bio…	ko00561;ko00564	Glycerolipid metabolism;Glycerophospholipid metabolism	Metabolism;Metabolism	GPAM
ENSG00000091436	1.95816	yes	up	2.64423e-05	yes	chr2	+	173263001	173264000	intron	last intron	NA	ENST00000476618	1.52194	no	up	0.305019	no	GO:0016310;GO:0005737;GO:0043065;GO:0005515;GO:0004672;GO:0000186;GO:0030154;GO:0000077;GO:0016301;GO:0005622;GO:0006468;GO:0007257;GO:0000075;GO:0060173;GO:0009314;GO:0007010;GO:0016740;GO:0000287;GO:0003723;GO:0005524;GO:0006950;GO:0035556;GO:0007050;GO:0042733;GO:0008283;GO:0000166;GO:0005829;GO:0005634;GO:0004709;GO:0000165;GO:0008219;GO:0046872;GO:0004674;GO:0007049	phosphorylation;cytoplasm;positive regulation of apoptotic process;protein binding;protein kinase activity;activation of MAPKK activity;cell differentiation;DNA damage checkpoint;kinase activity;intracellular;protein phosphorylation;activation of JUN kinase activity;cell cycle checkpoint;limb development;response to radiation;cytoskeleton organization;transferase activity;magnesium ion binding;RN…	ko04010	MAPK signaling pathway	Environmental Information Processing	MAP3K20
ENSG00000160145	1.96942	yes	up	4.05442e-05	yes	chr3	+	124695501	124696500	intron	internal intron	NA	ENST00000393496	0.580617	no	down	0.306049	no	GO:0007528;GO:0016310;GO:0008344;GO:0046959;GO:0014909;GO:0005085;GO:0005737;GO:1903076;GO:0043065;GO:0004672;GO:0070062;GO:0005856;GO:0009612;GO:0005654;GO:0035176;GO:0007165;GO:0051966;GO:0016301;GO:0030676;GO:0048013;GO:0006468;GO:0014069;GO:0001662;GO:0007266;GO:0016740;GO:0061003;GO:0051056;GO:0060137;GO:0007399;GO:0007595;GO:0005524;GO:0043547;GO:0035556;GO:0016192;GO:0048168;GO:0000166;GO:…	neuromuscular junction development;phosphorylation;adult locomotory behavior;habituation;smooth muscle cell migration;guanyl-nucleotide exchange factor activity;cytoplasm;regulation of protein localization to plasma membrane;positive regulation of apoptotic process;protein kinase activity;extracellular vesicular exosome;cytoskeleton;response to mechanical stimulus;nucleoplasm;social behavior;sign…	.	.	.	KALRN
ENSG00000159685	0.705882	yes	down	9.78411e-07	yes	chr3	+	126949501	126950500	downstream	NA	NA	ENST00000290913	0.578183	no	down	0.306765	no	GO:0016020;GO:0042407;GO:0005515;GO:0005829;GO:0005743;GO:0005739;GO:0006974;GO:0061617	membrane;cristae formation;protein binding;cytosol;mitochondrial inner membrane;mitochondrion;cellular response to DNA damage stimulus;MICOS complex	.	.	.	CHCHD6
ENSG00000106789	2.52036	yes	up	4.86236e-10	yes	chr9	-	98194501	98195500	promoter	Distal	ICP	ENST00000375077	1.50728	no	up	0.308109	no	GO:0003779;GO:0051015;GO:0017053;GO:0030036;GO:0015629;GO:0035556	actin binding;actin filament binding;transcriptional repressor complex;actin cytoskeleton organization;actin cytoskeleton;intracellular signal transduction	.	.	.	CORO2A
ENSG00000182985	0.197452	yes	down	0.000267611	yes	chr11	-	115503001	115504000	promoter	Proximal	ICP	ENST00000452722	0.589114	no	down	0.308818	no	GO:0016323;GO:0016020;GO:0030054;GO:0005102;GO:0007283;GO:0005913;GO:0005887;GO:0002376;GO:0005515;GO:0005911;GO:0016021;GO:0045954;GO:0008037;GO:0030165;GO:0045202;GO:0005886;GO:0070062;GO:0050839;GO:0030154;GO:0004872;GO:0007157;GO:0042803;GO:0051606;GO:0042271;GO:0006915;GO:0034332;GO:0007155;GO:0007156;GO:0007275;GO:0050715	basolateral plasma membrane;membrane;cell junction;receptor binding;spermatogenesis;cell-cell adherens junction;integral component of plasma membrane;immune system process;protein binding;cell-cell junction;integral component of membrane;positive regulation of natural killer cell mediated cytotoxicity;cell recognition;PDZ domain binding;synapse;plasma membrane;extracellular vesicular exosome;cell…	ko04514	Cell adhesion molecules (CAMs)	Environmental Information Processing	CADM1
ENSG00000152078	5.94583	yes	up	1.59175e-21	yes	chr1	+	95117501	95118500	intron	first intron	NA	ENST00000370203	1.53737	no	up	0.309688	no	GO:0016020;GO:0016021	membrane;integral component of membrane	.	.	.	TMEM56
ENSG00000099282	2.35279	yes	up	7.94594e-10	yes	chr10	+	69484001	69485000	downstream	NA	NA	ENST00000373290	0.581156	no	down	0.310185	no	GO:0070062;GO:0016020;GO:0097197;GO:0031902;GO:0007166;GO:0005768;GO:0009986;GO:0090002;GO:0005515;GO:0005887;GO:0051604;GO:0016021;GO:0019899;GO:0005886	extracellular vesicular exosome;membrane;tetraspanin-enriched microdomain;late endosome membrane;cell surface receptor signaling pathway;endosome;cell surface;establishment of protein localization to plasma membrane;protein binding;integral component of plasma membrane;protein maturation;integral component of membrane;enzyme binding;plasma membrane	.	.	.	TSPAN15
ENSG00000143995	0.117871	yes	down	8.71624e-07	yes	chr2	+	66575001	66576000	downstream	NA	NA	ENST00000495021	1.50841	no	up	0.311128	no	GO:0060044;GO:0003677;GO:0002089;GO:0006355;GO:0046982;GO:0045638;GO:0001077;GO:0003705;GO:0005515;GO:0005667;GO:0060216;GO:0003682;GO:0043565;GO:0030097;GO:0005634;GO:0000978;GO:0001525;GO:0035855;GO:0006351;GO:0006366;GO:0045665;GO:0007626;GO:0048514;GO:0045944;GO:0007275	negative regulation of cardiac muscle cell proliferation;DNA binding;lens morphogenesis in camera-type eye;regulation of transcription, DNA-templated;protein heterodimerization activity;negative regulation of myeloid cell differentiation;RNA polymerase II core promoter proximal region sequence-specific DNA binding transcription factor activity involved in positive regulation of transcription;RNA …	ko05202;ko04550	Transcriptional misregulation in cancer;Signaling pathways regulating pluripotency of stem cells	Human Diseases;Cellular Processes	MEIS1
ENSG00000160953	1.64441	yes	up	1.05438e-06	yes	chr19	+	1364001	1365000	intron	last intron	NA	ENST00000591806	0.595368	no	down	0.312924	no	GO:0031491;GO:0005634;GO:0005515;GO:0006281;GO:0005829;GO:0006325;GO:0006974	nucleosome binding;nucleus;protein binding;DNA repair;cytosol;chromatin organization;cellular response to DNA damage stimulus	.	.	.	MUM1
ENSG00000185513	0.491661	yes	down	8.98635e-06	yes	chr20	+	43514501	43515500	intron	internal intron	NA	ENST00000422861	0.589572	no	down	0.313142	no	GO:0042393;GO:0031493;GO:0006355;GO:0035064;GO:0032093;GO:0007088;GO:0005515;GO:0003682;GO:0008270;GO:0030097;GO:0003700;GO:0005886;GO:0000793;GO:0045892;GO:0005634;GO:0005654;GO:0042802;GO:0000785;GO:0006351;GO:0045652;GO:0031491;GO:1901796;GO:0046872;GO:0016569;GO:0006325;GO:0051726	histone binding;nucleosomal histone binding;regulation of transcription, DNA-templated;methylated histone binding;SAM domain binding;regulation of mitosis;protein binding;chromatin binding;zinc ion binding;hemopoiesis;sequence-specific DNA binding transcription factor activity;plasma membrane;condensed chromosome;negative regulation of transcription, DNA-templated;nucleus;nucleoplasm;identical pr…	.	.	.	L3MBTL1
ENSG00000161558	0.670409	yes	down	0.000426312	yes	chr19	-	48357001	48358000	downstream	NA	NA	ENST00000293261	0.588386	no	down	0.314054	no	GO:0016020;GO:0016021;GO:0005739	membrane;integral component of membrane;mitochondrion	.	.	.	TMEM143
ENSG00000169994	1.49347	yes	up	0.000406036	yes	chr2	+	127631001	127632000	intron	internal intron	NA	ENST00000428314	1.5069	no	up	0.314097	no	GO:0070062;GO:0005856;GO:0042995;GO:0005903;GO:0030154;GO:0005524;GO:0003774;GO:0005902;GO:0005737;GO:0003779;GO:0005515;GO:0000166;GO:0016459	extracellular vesicular exosome;cytoskeleton;cell projection;brush border;cell differentiation;ATP binding;motor activity;microvillus;cytoplasm;actin binding;protein binding;nucleotide binding;myosin complex	.	.	.	MYO7B
ENSG00000165113	1.99438	yes	up	0.000347202	yes	chr9	-	83792001	83793000	exon	internal exon	NA	ENST00000376365	0.580713	no	down	0.315706	no	GO:0016310;GO:0005515;GO:0007165;GO:0042802;GO:0016301;GO:0005794	phosphorylation;protein binding;signal transduction;identical protein binding;kinase activity;Golgi apparatus	.	.	.	GKAP1
ENSG00000175782	1.69684	yes	up	3.68731e-06	yes	chr12	+	68782501	68783500	downstream	NA	NA	ENST00000398004	0.600142	no	down	0.321011	no	GO:0016020;GO:0016021	membrane;integral component of membrane	.	.	.	SLC35E3
ENSG00000145284	1.68639	yes	up	5.17485e-05	yes	chr4	-	82680001	82681000	intron	internal intron	NA	ENST00000319540	0.598441	no	down	0.323156	no	GO:0016020;GO:0005783;GO:0046949;GO:0004768;GO:0055114;GO:0016717;GO:0046872;GO:0006636;GO:0006631;GO:0016021;GO:0005789;GO:0006633;GO:0016491;GO:0006629	membrane;endoplasmic reticulum;fatty-acyl-CoA biosynthetic process;stearoyl-CoA 9-desaturase activity;oxidation-reduction process;oxidoreductase activity, acting on paired donors, with oxidation of a pair of donors resulting in the reduction of molecular oxygen to two molecules of water;metal ion binding;unsaturated fatty acid biosynthetic process;fatty acid metabolic process;integral component o…	ko01040;ko04152;ko03320	Biosynthesis of unsaturated fatty acids;AMPK signaling pathway;PPAR signaling pathway	Metabolism;Environmental Information Processing;Organismal Systems	SCD5
ENSG00000112139	1.89078	yes	up	0.000470571	yes	chr6	-	37652001	37653000	intron	internal intron	NA	ENST00000434837	1.49198	no	up	0.326081	no	GO:0007399;GO:0016020;GO:0006501;GO:0005615;GO:0030154;GO:0007420;GO:0031225;GO:0021527;GO:0001764;GO:0007275;GO:0005576;GO:0046658;GO:0005886	nervous system development;membrane;C-terminal protein lipidation;extracellular space;cell differentiation;brain development;anchored component of membrane;spinal cord association neuron differentiation;neuron migration;multicellular organismal development;extracellular region;anchored component of plasma membrane;plasma membrane	.	.	.	MDGA1
ENSG00000229676	inf	yes	up	0.000124337	yes	chr19	+	22664501	22665500	exon	last exon	NA	ENST00000456783	0.587494	no	down	0.326118	no	GO:0003677;GO:0046872;GO:0005634;GO:0006355;GO:0005622;GO:0006351;GO:0003676	DNA binding;metal ion binding;nucleus;regulation of transcription, DNA-templated;intracellular;transcription, DNA-templated;nucleic acid binding	.	.	.	ZNF492
ENSG00000141098	0.505639	yes	down	0.000163333	yes	chr16	-	67687501	67688500	promoter	Distal	LCP	ENST00000268797	1.49667	no	up	0.326818	no	GO:0030198;GO:0005576;GO:0055114;GO:0005578;GO:0016491	extracellular matrix organization;extracellular region;oxidation-reduction process;proteinaceous extracellular matrix;oxidoreductase activity	.	.	.	GFOD2
ENSG00000186866	1.67302	yes	up	5.86886e-06	yes	chr21	-	45289501	45290500	promoter	Distal	ICP	ENST00000349485	1.50505	no	up	0.327942	no	GO:0010468;GO:0008417;GO:0006486;GO:0005783;GO:0010717;GO:0036065;GO:0046922;GO:0001707;GO:0051046;GO:0016757;GO:0005794;GO:0005975;GO:0036066;GO:0016740;GO:0005789;GO:0006004	regulation of gene expression;fucosyltransferase activity;protein glycosylation;endoplasmic reticulum;regulation of epithelial to mesenchymal transition;fucosylation;peptide-O-fucosyltransferase activity;mesoderm formation;regulation of secretion;transferase activity, transferring glycosyl groups;Golgi apparatus;carbohydrate metabolic process;protein O-linked fucosylation;transferase activity;end…	ko00514	Other types of O-glycan biosynthesis	Metabolism	POFUT2
ENSG00000040199	0.441687	yes	down	6.40856e-05	yes	chr16	-	71702501	71703500	intron	internal intron	NA	ENST00000567016	0.604316	no	down	0.330178	no	GO:0016020;GO:0005634;GO:0001917;GO:0007165;GO:0021766;GO:0003824;GO:0004722;GO:0005737;GO:0046872;GO:0016787;GO:0005515;GO:0005829;GO:0004721;GO:0006470;GO:0042622	membrane;nucleus;photoreceptor inner segment;signal transduction;hippocampus development;catalytic activity;protein serine/threonine phosphatase activity;cytoplasm;metal ion binding;hydrolase activity;protein binding;cytosol;phosphoprotein phosphatase activity;protein dephosphorylation;photoreceptor outer segment membrane	ko04151	PI3K-Akt signaling pathway	Environmental Information Processing	PHLPP2
ENSG00000170074	0.2321	yes	down	3.5077e-10	yes	chr5	-	177782501	177783500	exon	first exon	NA	ENST00000360669	0.601415	no	down	0.330918	no	.	.	.	.	.	FAM153A
ENSG00000111490	0.536508	yes	down	0.000522717	yes	chr12	+	64864501	64865500	intron	internal intron	NA	ENST00000542120	0.597778	no	down	0.331671	no	GO:0005929;GO:0016020;GO:1902018;GO:0043547;GO:0036064;GO:0006886;GO:0012505;GO:0005829;GO:0031338;GO:0017137;GO:0005886;GO:0005096	cilium;membrane;negative regulation of cilium assembly;positive regulation of GTPase activity;ciliary basal body;intracellular protein transport;endomembrane system;cytosol;regulation of vesicle fusion;Rab GTPase binding;plasma membrane;GTPase activator activity	.	.	.	TBC1D30
ENSG00000128578	0.57563	yes	down	0.000736152	yes	chr7	+	129480501	129481500	intron	last intron	NA	ENST00000249344	1.49911	no	up	0.333601	no	GO:0016477;GO:0005829;GO:0007010;GO:0008360;GO:0005737	cell migration;cytosol;cytoskeleton organization;regulation of cell shape;cytoplasm	.	.	.	STRIP2
ENSG00000215912	0.556846	yes	down	0.000934112	yes	chr1	-	2641001	2642000	intron	last intron	NA	ENST00000401095	0.595241	no	down	0.334595	no	.	.	.	.	.	TTC34
ENSG00000143297	1.80851	yes	up	0.000251362	yes	chr1	-	157521001	157522000	downstream	NA	NA	ENST00000361835	0.604798	no	down	0.336698	no	GO:0016020;GO:0016021;GO:0005886;GO:0043235	membrane;integral component of membrane;plasma membrane;receptor complex	.	.	.	FCRL5
ENSG00000197128	1.56639	yes	up	0.000448892	yes	chr19	-	57469501	57470500	exon	last exon	NA	ENST00000343280	0.602999	no	down	0.337783	no	GO:0003677;GO:0046872;GO:0005634;GO:0005515;GO:0006355;GO:0005622;GO:0006351;GO:0003676	DNA binding;metal ion binding;nucleus;protein binding;regulation of transcription, DNA-templated;intracellular;transcription, DNA-templated;nucleic acid binding	.	.	.	ZNF772
ENSG00000140107	0.602538	yes	down	6.00002e-06	yes	chr14	+	100321001	100322000	promoter	Distal	LCP	ENST00000361529	0.597224	no	down	0.339607	no	GO:0016020;GO:0006810;GO:0055085;GO:0006839;GO:0016021;GO:0005743;GO:0005739;GO:0022857	membrane;transport;transmembrane transport;mitochondrial transport;integral component of membrane;mitochondrial inner membrane;mitochondrion;transmembrane transporter activity	.	.	.	SLC25A47
ENSG00000131591	0.521262	yes	down	0.000800036	yes	chr1	-	1115001	1116000	promoter	Proximal	ICP	ENST00000477196	1.4776	no	up	0.342428	no	GO:0016020;GO:0016021	membrane;integral component of membrane	.	.	.	C1orf159
ENSG00000283199	0.881065	yes	down	2.16611e-05	yes	chr13	-	113954501	113955500	downstream	NA	NA	ENST00000636427	0.609353	no	down	0.344648	no	.	.	.	.	.	FP565324.1
ENSG00000003393	2.09005	yes	up	0.000100113	yes	chr2	-	201758001	201759000	downstream	NA	NA	ENST00000482789	1.47591	no	up	0.345534	no	GO:0016020;GO:0007528;GO:0030425;GO:0035022;GO:0005085;GO:0005737;GO:0031982;GO:0043025;GO:0030426;GO:0005515;GO:0071902;GO:0043197;GO:0017137;GO:0005769;GO:0030676;GO:0017112;GO:0014069;GO:0030027;GO:0043005;GO:0007409;GO:0001662;GO:0006979;GO:0035249;GO:0008104;GO:0001881;GO:0043539;GO:0043547;GO:0016050;GO:0048812;GO:0005829;GO:0045860;GO:0043231;GO:0030424;GO:0016197;GO:0005813;GO:0001701;GO:…	membrane;neuromuscular junction development;dendrite;positive regulation of Rac protein signal transduction;guanyl-nucleotide exchange factor activity;cytoplasm;vesicle;neuronal cell body;growth cone;protein binding;positive regulation of protein serine/threonine kinase activity;dendritic spine;Rab GTPase binding;early endosome;Rac guanyl-nucleotide exchange factor activity;Rab guanyl-nucleotide …	ko05014	Amyotrophic lateral sclerosis (ALS)	Human Diseases	ALS2
ENSG00000119042	-inf	yes	down	0.000263947	yes	chr2	-	199457501	199458500	promoter	Proximal	HCP	ENST00000443023	1.50997	no	up	0.346445	no	GO:0010468;GO:0003677;GO:0006338;GO:0006355;GO:0051216;GO:0001077;GO:0071310;GO:0000122;GO:0006357;GO:0021902;GO:0009880;GO:0005515;GO:0005667;GO:0003682;GO:0043565;GO:0000118;GO:0060021;GO:0005634;GO:0005654;GO:0000978;GO:0016363;GO:0006351;GO:0006366;GO:0001764;GO:0048704;GO:0045944;GO:0007275;GO:0016569;GO:0000977;GO:0002076	regulation of gene expression;DNA binding;chromatin remodeling;regulation of transcription, DNA-templated;cartilage development;RNA polymerase II core promoter proximal region sequence-specific DNA binding transcription factor activity involved in positive regulation of transcription;cellular response to organic substance;negative regulation of transcription from RNA polymerase II promoter;regula…	.	.	.	SATB2
ENSG00000156414	1.43467	yes	up	0.000703689	yes	chr14	+	104033001	104034000	exon	internal exon	NA	ENST00000409874	1.45904	no	up	0.346772	no	GO:0006396;GO:0003723;GO:0005524;GO:0004386;GO:0007283;GO:0005737;GO:0034587;GO:0016787;GO:0043046;GO:0051321;GO:0000166;GO:0043186;GO:0005739;GO:0005634;GO:0009566;GO:0030154;GO:0031047;GO:0003676;GO:0007140;GO:0004004;GO:0071547;GO:0007275	RNA processing;RNA binding;ATP binding;helicase activity;spermatogenesis;cytoplasm;piRNA metabolic process;hydrolase activity;DNA methylation involved in gamete generation;meiotic cell cycle;nucleotide binding;P granule;mitochondrion;nucleus;fertilization;cell differentiation;gene silencing by RNA;nucleic acid binding;male meiosis;ATP-dependent RNA helicase activity;piP-body;multicellular organis…	.	.	.	TDRD9
ENSG00000113645	0.642308	yes	down	0.00061143	yes	chr5	+	168415501	168416500	exon	first exon	NA	ENST00000265293	1.49798	no	up	0.347109	no	GO:0016020;GO:0016477;GO:0042995;GO:0035329;GO:0030674;GO:0006355;GO:0032587;GO:0005737;GO:0000122;GO:0032386;GO:0005515;GO:0046621;GO:0005829;GO:0019900;GO:0005886;GO:0035330;GO:0005634;GO:0032947;GO:0035331;GO:0006351;GO:0048471;GO:0030010;GO:0003713;GO:0043234;GO:0043410	membrane;cell migration;cell projection;hippo signaling;protein binding, bridging;regulation of transcription, DNA-templated;ruffle membrane;cytoplasm;negative regulation of transcription from RNA polymerase II promoter;regulation of intracellular transport;protein binding;negative regulation of organ growth;cytosol;kinase binding;plasma membrane;regulation of hippo signaling;nucleus;protein comp…	ko04392;ko04390	Hippo signaling pathway - multiple species;Hippo signaling pathway	Environmental Information Processing;Environmental Information Processing	WWC1
ENSG00000110318	0.621287	yes	down	0.000555235	yes	chr11	+	101976501	101977500	promoter	Intermediate	LCP	ENST00000532529	0.599684	no	down	0.34714	no	GO:0005856;GO:0005815;GO:0042995;GO:0005813;GO:0030030;GO:0005737;GO:0030496;GO:0060271;GO:0005515;GO:0007052;GO:0097546;GO:0031122	cytoskeleton;microtubule organizing center;cell projection;centrosome;cell projection organization;cytoplasm;midbody;cilium morphogenesis;protein binding;mitotic spindle organization;ciliary base;cytoplasmic microtubule organization	.	.	.	CEP126
ENSG00000131381	1.75862	yes	up	0.000166792	yes	chr3	-	15094501	15095500	downstream	NA	NA	ENST00000253699	1.45308	no	up	0.347179	no	GO:0010008;GO:0016020;GO:1903358;GO:0007596;GO:0090160;GO:0006895;GO:0005515;GO:0005829;GO:0000011;GO:0006897;GO:0008270;GO:0017137;GO:0015031;GO:0005886;GO:0006810;GO:0043231;GO:0070062;GO:0016197;GO:0034498;GO:0010009;GO:0003676;GO:0005768;GO:0046872;GO:0031901;GO:0034058	endosome membrane;membrane;regulation of Golgi organization;blood coagulation;Golgi to lysosome transport;Golgi to endosome transport;protein binding;cytosol;vacuole inheritance;endocytosis;zinc ion binding;Rab GTPase binding;protein transport;plasma membrane;transport;intracellular membrane-bounded organelle;extracellular vesicular exosome;endosomal transport;early endosome to Golgi transport;cy…	ko04144	Endocytosis	Cellular Processes	RBSN
ENSG00000116641	1.68737	yes	up	1.86494e-05	yes	chr1	-	62620501	62621500	promoter	Distal	LCP	ENST00000635123	0.615494	no	down	0.347483	no	GO:0007399;GO:0042995;GO:0048365;GO:0043547;GO:0005085;GO:0030426;GO:0008180;GO:0007264;GO:0031175;GO:0030424;GO:0000226;GO:0030154;GO:0005925;GO:0005622;GO:0045200;GO:0043005;GO:0007409;GO:0007275;GO:0033138;GO:0045178;GO:0022027;GO:0050767	nervous system development;cell projection;Rac GTPase binding;positive regulation of GTPase activity;guanyl-nucleotide exchange factor activity;growth cone;COP9 signalosome;small GTPase mediated signal transduction;neuron projection development;axon;microtubule cytoskeleton organization;cell differentiation;focal adhesion;intracellular;establishment of neuroblast polarity;neuron projection;axonog…	.	.	.	DOCK7
ENSG00000198865	2.08434	yes	up	7.2207e-07	yes	chr5	+	42769001	42770000	intron	internal intron	NA	ENST00000361970	0.605156	no	down	0.348237	no	.	.	.	.	.	CCDC152
ENSG00000151240	1.64402	yes	up	7.63259e-06	yes	chr10	-	484501	485500	intron	internal intron	NA	ENST00000280886	0.612309	no	down	0.348527	no	GO:0008152;GO:0003824	metabolic process;catalytic activity	.	.	.	DIP2C
ENSG00000104884	1.96837	yes	up	1.96329e-05	yes	chr19	-	45355501	45356500	intron	internal intron	NA	ENST00000391945	1.46263	no	up	0.348685	no	GO:0006361;GO:0006296;GO:0005737;GO:0006289;GO:0008026;GO:0004672;GO:0035315;GO:0006363;GO:0005654;GO:0043249;GO:0019907;GO:0005669;GO:0006915;GO:0004003;GO:0005675;GO:1901990;GO:0006979;GO:0030198;GO:0045944;GO:0008094;GO:0003677;GO:0043588;GO:0005524;GO:0007059;GO:0021510;GO:0045893;GO:0040016;GO:0000166;GO:0043388;GO:0009650;GO:0030282;GO:0060218;GO:0001701;GO:0006351;GO:0000439;GO:0007568;GO:…	transcription initiation from RNA polymerase I promoter;nucleotide-excision repair, DNA incision, 5'-to lesion;cytoplasm;nucleotide-excision repair;ATP-dependent helicase activity;protein kinase activity;hair cell differentiation;termination of RNA polymerase I transcription;nucleoplasm;erythrocyte maturation;cyclin-dependent protein kinase activating kinase holoenzyme complex;transcription facto…	ko03022;ko03420	Basal transcription factors;Nucleotide excision repair	Genetic Information Processing;Genetic Information Processing	ERCC2
ENSG00000163554	1.76628	yes	up	0.000473445	yes	chr1	-	158683001	158684000	intron	internal intron	NA	ENST00000368147	1.48283	no	up	0.348909	no	GO:0016020;GO:0051015;GO:0005938;GO:0042102;GO:0005737;GO:0030863;GO:0032092;GO:0007015;GO:0005515;GO:0009898;GO:0007411;GO:0005856;GO:0051693;GO:0030036;GO:0008360;GO:0008091;GO:0031235;GO:0046982;GO:0043547;GO:0006779;GO:0005829;GO:0007009;GO:0015629;GO:0030097;GO:0030424;GO:0000165;GO:0005200;GO:0003779;GO:0046872;GO:0005088;GO:0005509;GO:0014731;GO:0032437;GO:0006888;GO:0002260	membrane;actin filament binding;cell cortex;positive regulation of T cell proliferation;cytoplasm;cortical cytoskeleton;positive regulation of protein binding;actin filament organization;protein binding;cytoplasmic side of plasma membrane;axon guidance;cytoskeleton;actin filament capping;actin cytoskeleton organization;regulation of cell shape;spectrin;intrinsic component of the cytoplasmic side …	ko04210	Apoptosis	Cellular Processes	SPTA1
ENSG00000138336	1.68293	yes	up	0.00074312	yes	chr10	+	68695001	68696000	downstream	NA	NA	ENST00000373644	0.615901	no	down	0.349212	no	GO:0031062;GO:0003677;GO:0005506;GO:0006355;GO:0080111;GO:0070579;GO:0090310;GO:0055114;GO:0001826;GO:0008270;GO:0016491;GO:0005634;GO:0006351;GO:0051213;GO:0046872;GO:0019827;GO:0016569;GO:0045944;GO:0006493;GO:0008284	positive regulation of histone methylation;DNA binding;iron ion binding;regulation of transcription, DNA-templated;DNA demethylation;methylcytosine dioxygenase activity;negative regulation of methylation-dependent chromatin silencing;oxidation-reduction process;inner cell mass cell differentiation;zinc ion binding;oxidoreductase activity;nucleus;transcription, DNA-templated;dioxygenase activity;m…	.	.	.	TET1
ENSG00000151117	0.330918	yes	down	1.24546e-06	yes	chr11	+	18706001	18707000	downstream	NA	NA	ENST00000280734	1.4647	no	up	0.349637	no	GO:0016020;GO:0016021	membrane;integral component of membrane	.	.	.	TMEM86A
ENSG00000107779	2.89041	yes	up	0.000193024	yes	chr10	+	86931001	86932000	downstream	NA	NA	ENST00000372037	0.616821	no	down	0.350775	no	GO:0030425;GO:1902895;GO:0003148;GO:0016020;GO:0009897;GO:0051216;GO:0021998;GO:0043025;GO:0061312;GO:0004672;GO:0004702;GO:0007492;GO:0009953;GO:0007507;GO:0002053;GO:0007178;GO:0030509;GO:0003151;GO:0042475;GO:0003186;GO:0048352;GO:0002062;GO:0045944;GO:2000772;GO:0048598;GO:0030324;GO:0007399;GO:0005524;GO:0035137;GO:0045893;GO:0003007;GO:0001707;GO:0005901;GO:0010862;GO:0000166;GO:0005886;GO:…	dendrite;positive regulation of pri-miRNA transcription from RNA polymerase II promoter;outflow tract septum morphogenesis;membrane;external side of plasma membrane;cartilage development;neural plate mediolateral regionalization;neuronal cell body;BMP signaling pathway involved in heart development;protein kinase activity;receptor signaling protein serine/threonine kinase activity;endoderm develo…	ko04060;ko05418;ko04350;ko04390;ko04550	Cytokine-cytokine receptor interaction;Fluid shear stress and atherosclerosis;TGF-beta signaling pathway;Hippo signaling pathway;Signaling pathways regulating pluripotency of stem cells	Environmental Information Processing;Human Diseases;Environmental Information Processing;Environmental Information Processing;Cellular Processes	BMPR1A
ENSG00000003393	2.09005	yes	up	0.000100113	yes	chr2	-	201758001	201759000	downstream	NA	NA	ENST00000467448	1.47799	no	up	0.351587	no	GO:0016020;GO:0007528;GO:0030425;GO:0035022;GO:0005085;GO:0005737;GO:0031982;GO:0043025;GO:0030426;GO:0005515;GO:0071902;GO:0043197;GO:0017137;GO:0005769;GO:0030676;GO:0017112;GO:0014069;GO:0030027;GO:0043005;GO:0007409;GO:0001662;GO:0006979;GO:0035249;GO:0008104;GO:0001881;GO:0043539;GO:0043547;GO:0016050;GO:0048812;GO:0005829;GO:0045860;GO:0043231;GO:0030424;GO:0016197;GO:0005813;GO:0001701;GO:…	membrane;neuromuscular junction development;dendrite;positive regulation of Rac protein signal transduction;guanyl-nucleotide exchange factor activity;cytoplasm;vesicle;neuronal cell body;growth cone;protein binding;positive regulation of protein serine/threonine kinase activity;dendritic spine;Rab GTPase binding;early endosome;Rac guanyl-nucleotide exchange factor activity;Rab guanyl-nucleotide …	ko05014	Amyotrophic lateral sclerosis (ALS)	Human Diseases	ALS2
ENSG00000204590	1.5017	yes	up	7.10776e-05	yes	chr6	-	30559001	30560000	promoter	Distal	ICP	ENST00000433809	0.601457	no	down	0.353898	no	GO:0005615;GO:0005634;GO:0007165;GO:0002456;GO:0003924;GO:0042254;GO:0000166;GO:0005198;GO:0005525;GO:0006974	extracellular space;nucleus;signal transduction;T cell mediated immunity;GTPase activity;ribosome biogenesis;nucleotide binding;structural molecule activity;GTP binding;cellular response to DNA damage stimulus	.	.	.	GNL1
ENSG00000261611	1.59106	yes	up	6.65789e-05	yes	chr16	-	71445001	71446000	downstream	NA	NA	ENST00000561908	0.617023	no	down	0.355697	no	GO:0006355;GO:0005622;GO:0003676	regulation of transcription, DNA-templated;intracellular;nucleic acid binding	.	.	.	AC010547.5
ENSG00000100058	2.84411	yes	up	1.52572e-09	yes	chr22	+	25458001	25459000	promoter	Intermediate	LCP	ENST00000382734	1.47568	no	up	0.356328	no	.	.	.	.	.	CRYBB2P1
ENSG00000137806	2.13483	yes	up	1.98094e-06	yes	chr15	-	41402501	41403500	promoter	Distal	ICP	ENST00000260361	1.46702	no	up	0.356846	no	GO:0032981;GO:0005515;GO:0006120;GO:0005747;GO:0005829;GO:0051082;GO:0005743;GO:0005739;GO:0006461	mitochondrial respiratory chain complex I assembly;protein binding;mitochondrial electron transport, NADH to ubiquinone;mitochondrial respiratory chain complex I;cytosol;unfolded protein binding;mitochondrial inner membrane;mitochondrion;protein complex assembly	.	.	.	NDUFAF1
ENSG00000110799	0.667018	yes	down	0.000633106	yes	chr12	-	6075501	6076500	intron	internal intron	NA	ENST00000261405	1.44292	no	up	0.356921	no	GO:0005783;GO:0007596;GO:0047485;GO:0033093;GO:0019865;GO:0007597;GO:0051260;GO:0051087;GO:0030168;GO:0002576;GO:0005178;GO:0005515;GO:0005576;GO:0007599;GO:0009611;GO:0070062;GO:0031012;GO:0002020;GO:0042802;GO:0031589;GO:0042803;GO:0005578;GO:0031093;GO:0007155;GO:0005518;GO:0031091;GO:0030198	endoplasmic reticulum;blood coagulation;protein N-terminus binding;Weibel-Palade body;immunoglobulin binding;blood coagulation, intrinsic pathway;protein homooligomerization;chaperone binding;platelet activation;platelet degranulation;integrin binding;protein binding;extracellular region;hemostasis;response to wounding;extracellular vesicular exosome;extracellular matrix;protease binding;identica…	ko04611;ko04610;ko05165;ko04510;ko04151;ko04512	Platelet activation;Complement and coagulation cascades;Human papillomavirus infection;Focal adhesion;PI3K-Akt signaling pathway;ECM-receptor interaction	Organismal Systems;Organismal Systems;Human Diseases;Cellular Processes;Environmental Information Processing;Environmental Information Processing	VWF
ENSG00000185630	0.572795	yes	down	0.000197287	yes	chr1	+	164785501	164786500	promoter	Distal	LCP	ENST00000367897	0.60728	no	down	0.358188	no	GO:0042127;GO:0035019;GO:0001077;GO:0048568;GO:0005737;GO:0001658;GO:0005515;GO:0003700;GO:0005654;GO:0000978;GO:0030154;GO:0007548;GO:0000977;GO:0045944;GO:0030325;GO:0007275;GO:0048706;GO:0009954;GO:0009952;GO:0003677;GO:0006355;GO:0046982;GO:0035162;GO:0005667;GO:0048536;GO:0043565;GO:0090575;GO:0006694;GO:0005634;GO:0001655;GO:0048538;GO:0006351;GO:0030326;GO:0006366;GO:0030278;GO:0045665;GO:…	regulation of cell proliferation;somatic stem cell maintenance;RNA polymerase II core promoter proximal region sequence-specific DNA binding transcription factor activity involved in positive regulation of transcription;embryonic organ development;cytoplasm;branching involved in ureteric bud morphogenesis;protein binding;sequence-specific DNA binding transcription factor activity;nucleoplasm;RNA …	ko05202;ko04927	Transcriptional misregulation in cancer;Cortisol synthesis and secretionè½New!	Human Diseases;Organismal Systems	PBX1
ENSG00000101194	2.3009	yes	up	7.44749e-09	yes	chr20	+	62965501	62966500	intron	internal intron	NA	ENST00000488738	0.608103	no	down	0.358711	no	GO:0006820;GO:0016020;GO:0006810;GO:0055085;GO:1903146;GO:0016021;GO:0005215;GO:0006887;GO:0022857	anion transport;membrane;transport;transmembrane transport;regulation of mitochondrion degradation;integral component of membrane;transporter activity;exocytosis;transmembrane transporter activity	.	.	.	SLC17A9
ENSG00000135643	1.6819	yes	up	9.21673e-06	yes	chr12	+	70430501	70431500	exon	last exon	NA	ENST00000258111	1.45831	no	up	0.358882	no	GO:0016020;GO:0019229;GO:0019228;GO:0005515;GO:0005887;GO:0016021;GO:0046928;GO:0005886;GO:0005513;GO:0008076;GO:0006810;GO:0006813;GO:0015459;GO:0015269;GO:0006811;GO:0065009;GO:0001508;GO:0007268;GO:0071805	membrane;regulation of vasoconstriction;neuronal action potential;protein binding;integral component of plasma membrane;integral component of membrane;regulation of neurotransmitter secretion;plasma membrane;detection of calcium ion;voltage-gated potassium channel complex;transport;potassium ion transport;potassium channel regulator activity;calcium-activated potassium channel activity;ion transp…	ko04270;ko04022;ko04911	Vascular smooth muscle contraction;cGMP-PKG signaling pathway;Insulin secretion	Organismal Systems;Environmental Information Processing;Organismal Systems	KCNMB4
ENSG00000175066	1.39695	yes	up	0.000526138	yes	chr3	-	142196001	142197000	downstream	NA	NA	ENST00000480757	0.622436	no	down	0.361249	no	GO:0016310;GO:0019563;GO:0005524;GO:0006641;GO:0004370;GO:0016301;GO:0016773;GO:0006071;GO:0000166;GO:0005975;GO:0016740;GO:0005739;GO:0046167	phosphorylation;glycerol catabolic process;ATP binding;triglyceride metabolic process;glycerol kinase activity;kinase activity;phosphotransferase activity, alcohol group as acceptor;glycerol metabolic process;nucleotide binding;carbohydrate metabolic process;transferase activity;mitochondrion;glycerol-3-phosphate biosynthetic process	.	.	.	GK5
ENSG00000080561	1.81009	yes	up	0.000529987	yes	chrX	+	107825001	107826000	exon	first exon	NA	ENST00000443968	0.621096	no	down	0.363528	no	GO:0005874;GO:0046982;GO:0016567;GO:0046597;GO:0005737;GO:0051091;GO:0008270;GO:0032897;GO:0035372;GO:0045087;GO:0051219;GO:0005856;GO:0070062;GO:0051092;GO:0005622;GO:1902187;GO:0042803;GO:0008017;GO:0010508;GO:0043123;GO:0046872;GO:0016740	microtubule;protein heterodimerization activity;protein ubiquitination;negative regulation of viral entry into host cell;cytoplasm;positive regulation of sequence-specific DNA binding transcription factor activity;zinc ion binding;negative regulation of viral transcription;protein localization to microtubule;innate immune response;phosphoprotein binding;cytoskeleton;extracellular vesicular exosom…	.	.	.	MID2
ENSG00000087237	2.37152	yes	up	0.000102404	yes	chr16	+	56983001	56984000	downstream	NA	NA	ENST00000200676	1.47062	no	up	0.363831	no	GO:0046470;GO:0005615;GO:0034374;GO:0031982;GO:0030301;GO:0034372;GO:0005319;GO:0070328;GO:0055091;GO:0070062;GO:0031210;GO:0034197;GO:0008289;GO:0055088;GO:0043691;GO:0005548;GO:0006629;GO:0008203;GO:0006869;GO:0015485;GO:0017129;GO:0008202;GO:0034364;GO:0015914;GO:0005576;GO:0042632;GO:0006810;GO:0010874;GO:0006641;GO:0017127;GO:0010745;GO:0034375	phosphatidylcholine metabolic process;extracellular space;low-density lipoprotein particle remodeling;vesicle;cholesterol transport;very-low-density lipoprotein particle remodeling;lipid transporter activity;triglyceride homeostasis;phospholipid homeostasis;extracellular vesicular exosome;phosphatidylcholine binding;triglyceride transport;lipid binding;lipid homeostasis;reverse cholesterol transp…	ko04979	Cholesterol metabolism	Organismal Systems	CETP
ENSG00000119673	4.48837	yes	up	3.26761e-09	yes	chr14	+	73572001	73573000	promoter	Distal	LCP	ENST00000238651	0.616107	no	down	0.364945	no	GO:0005759;GO:0070062;GO:0000038;GO:0052689;GO:0005102;GO:0001676;GO:0047617;GO:0016787;GO:0016790;GO:0016290;GO:0005739;GO:0006637	mitochondrial matrix;extracellular vesicular exosome;very long-chain fatty acid metabolic process;carboxylic ester hydrolase activity;receptor binding;long-chain fatty acid metabolic process;acyl-CoA hydrolase activity;hydrolase activity;thiolester hydrolase activity;palmitoyl-CoA hydrolase activity;mitochondrion;acyl-CoA metabolic process	ko00062;ko01040;ko04913	Fatty acid elongation;Biosynthesis of unsaturated fatty acids;Ovarian steroidogenesis	Metabolism;Metabolism;Organismal Systems	ACOT2
ENSG00000128283	0.263158	yes	down	0.000175379	yes	chr22	+	37566501	37567500	downstream	NA	NA	ENST00000249014	1.45478	no	up	0.365797	no	GO:0016020;GO:0043547;GO:0005737;GO:0098609;GO:0012505;GO:0005913;GO:0005515;GO:0017049;GO:0030838;GO:0005886;GO:0005856;GO:0098641;GO:0005925;GO:0031274;GO:0008360;GO:0007266;GO:0005096	membrane;positive regulation of GTPase activity;cytoplasm;cell-cell adhesion;endomembrane system;cell-cell adherens junction;protein binding;GTP-Rho binding;positive regulation of actin filament polymerization;plasma membrane;cytoskeleton;cadherin binding involved in cell-cell adhesion;focal adhesion;positive regulation of pseudopodium assembly;regulation of cell shape;Rho protein signal transduc…	.	.	.	CDC42EP1
ENSG00000123600	0.614322	yes	down	2.42164e-05	yes	chr2	-	171436001	171437000	promoter	Distal	ICP	ENST00000612742	1.43144	no	up	0.366843	no	GO:0005634;GO:0004402;GO:0008168;GO:0016573;GO:0005737;GO:0045444;GO:0016740;GO:0007519;GO:0032259	nucleus;histone acetyltransferase activity;methyltransferase activity;histone acetylation;cytoplasm;fat cell differentiation;transferase activity;skeletal muscle tissue development;methylation	.	.	.	METTL8
ENSG00000186866	1.67302	yes	up	5.86886e-06	yes	chr21	-	45289501	45290500	promoter	Distal	ICP	ENST00000334538	0.619148	no	down	0.367419	no	GO:0010468;GO:0008417;GO:0006486;GO:0005783;GO:0010717;GO:0036065;GO:0046922;GO:0001707;GO:0051046;GO:0016757;GO:0005794;GO:0005975;GO:0036066;GO:0016740;GO:0005789;GO:0006004	regulation of gene expression;fucosyltransferase activity;protein glycosylation;endoplasmic reticulum;regulation of epithelial to mesenchymal transition;fucosylation;peptide-O-fucosyltransferase activity;mesoderm formation;regulation of secretion;transferase activity, transferring glycosyl groups;Golgi apparatus;carbohydrate metabolic process;protein O-linked fucosylation;transferase activity;end…	ko00514	Other types of O-glycan biosynthesis	Metabolism	POFUT2
ENSG00000185436	0.562902	yes	down	0.000189668	yes	chr1	-	24187501	24188500	promoter	Distal	ICP	ENST00000327535	1.43153	no	up	0.368683	no	GO:0016020;GO:0032002;GO:0004896;GO:0051607;GO:0005515;GO:0034342;GO:0016021;GO:0050691;GO:0019221;GO:0005886;GO:0008285;GO:0002385	membrane;interleukin-28 receptor complex;cytokine receptor activity;defense response to virus;protein binding;response to type III interferon;integral component of membrane;regulation of defense response to virus by host;cytokine-mediated signaling pathway;plasma membrane;negative regulation of cell proliferation;mucosal immune response	ko04060;ko04630	Cytokine-cytokine receptor interaction;Jak-STAT signaling pathway	Environmental Information Processing;Environmental Information Processing	IFNLR1
ENSG00000143603	0.43578	yes	down	0.000529326	yes	chr1	-	154870001	154871000	exon	first exon	NA	ENST00000618040	1.47861	no	up	0.369031	no	GO:0006810;GO:0016020;GO:0006813;GO:0015269;GO:0005737;GO:0006811;GO:0043025;GO:0016021;GO:0071805;GO:0005516;GO:0005886;GO:0016286	transport;membrane;potassium ion transport;calcium-activated potassium channel activity;cytoplasm;ion transport;neuronal cell body;integral component of membrane;potassium ion transmembrane transport;calmodulin binding;plasma membrane;small conductance calcium-activated potassium channel activity	ko04911	Insulin secretion	Organismal Systems	KCNN3
ENSG00000134057	1.41844	yes	up	0.00088409	yes	chr5	+	69164001	69165000	promoter	Distal	ICP	ENST00000256442	1.43903	no	up	0.369296	no	GO:0016020;GO:0090266;GO:0033129;GO:0005737;GO:0061575;GO:0019901;GO:0007080;GO:0004693;GO:0005515;GO:0071283;GO:0005856;GO:0042493;GO:0009612;GO:0005815;GO:0005654;GO:0016301;GO:0048146;GO:0006468;GO:0001556;GO:0060623;GO:0005113;GO:0046680;GO:0001933;GO:0007052;GO:0051726;GO:0051439;GO:0006461;GO:0045787;GO:0071456;GO:0007077;GO:0005759;GO:0000922;GO:0055015;GO:0000278;GO:0097125;GO:0010629;GO:…	membrane;regulation of mitotic cell cycle spindle assembly checkpoint;positive regulation of histone phosphorylation;cytoplasm;cyclin-dependent protein serine/threonine kinase activator activity;protein kinase binding;mitotic metaphase plate congression;cyclin-dependent protein serine/threonine kinase activity;protein binding;cellular response to iron(III) ion;cytoskeleton;response to drug;respon…	ko04218;ko04115;ko04914;ko04110;ko04114;ko04068	Cellular senescence;p53 signaling pathway;Progesterone-mediated oocyte maturation;Cell cycle;Oocyte meiosis;FoxO signaling pathway	Cellular Processes;Cellular Processes;Organismal Systems;Cellular Processes;Cellular Processes;Environmental Information Processing	CCNB1
ENSG00000087995	1.56735	yes	up	0.000374399	yes	chr17	+	62422501	62423500	promoter	Distal	ICP	ENST00000311506	1.44002	no	up	0.369406	no	GO:0008168;GO:0016427;GO:0030488;GO:0016740;GO:0032259	methyltransferase activity;tRNA (cytosine) methyltransferase activity;tRNA methylation;transferase activity;methylation	.	.	.	METTL2A
ENSG00000167186	0.163551	yes	down	0.00050106	yes	chr16	+	19067501	19068500	intron	first intron	NA	ENST00000321998	0.623384	no	down	0.36969	no	GO:0016709;GO:0016020;GO:0005634;GO:0031314;GO:0006744;GO:0055114;GO:0046872;GO:0005515;GO:0005743;GO:0004497;GO:0005739;GO:0016491	oxidoreductase activity, acting on paired donors, with incorporation or reduction of molecular oxygen, NAD(P)H as one donor, and incorporation of one atom of oxygen;membrane;nucleus;extrinsic component of mitochondrial inner membrane;ubiquinone biosynthetic process;oxidation-reduction process;metal ion binding;protein binding;mitochondrial inner membrane;monooxygenase activity;mitochondrion;oxido…	ko00130	Ubiquinone and other terpenoid-quinone biosynthesis	Metabolism	COQ7
ENSG00000151062	0.457441	yes	down	7.46536e-09	yes	chr12	-	1907501	1908500	exon	internal exon	NA	ENST00000585385	0.612531	no	down	0.369942	no	GO:0070588;GO:0016020;GO:0006810;GO:0061337;GO:0005244;GO:0050908;GO:0005245;GO:0034765;GO:0006816;GO:0006811;GO:0046872;GO:0016021;GO:0005262;GO:0005886;GO:0005891	calcium ion transmembrane transport;membrane;transport;cardiac conduction;voltage-gated ion channel activity;detection of light stimulus involved in visual perception;voltage-gated calcium channel activity;regulation of ion transmembrane transport;calcium ion transport;ion transport;metal ion binding;integral component of membrane;calcium channel activity;plasma membrane;voltage-gated calcium cha…	ko05414;ko04921;ko04261;ko04010;ko04260;ko05412;ko05410	Dilated cardiomyopathy (DCM);Oxytocin signaling pathway;Adrenergic signaling in cardiomyocytes;MAPK signaling pathway;Cardiac muscle contraction;Arrhythmogenic right ventricular cardiomyopathy (ARVC);Hypertrophic cardiomyopathy (HCM)	Human Diseases;Organismal Systems;Organismal Systems;Environmental Information Processing;Organismal Systems;Human Diseases;Human Diseases	CACNA2D4
ENSG00000148600	3.58427	yes	up	2.61297e-05	yes	chr10	+	84201501	84202500	promoter	Distal	LCP	ENST00000623527	0.612724	no	down	0.370284	no	GO:0016020;GO:0045494;GO:0007155;GO:0005887;GO:0005509;GO:0007156;GO:0016021;GO:0009987;GO:0042622;GO:0005886	membrane;photoreceptor cell maintenance;cell adhesion;integral component of plasma membrane;calcium ion binding;homophilic cell adhesion via plasma membrane adhesion molecules;integral component of membrane;cellular process;photoreceptor outer segment membrane;plasma membrane	.	.	.	CDHR1
ENSG00000182732	0.323944	yes	down	1.79862e-07	yes	chr14	+	72459501	72460500	intron	internal intron	NA	ENST00000406236	0.617599	no	down	0.370479	no	GO:0007186;GO:0016020;GO:0005634;GO:0019898;GO:0005834;GO:0009968;GO:0043547;GO:0035556;GO:0005737;GO:0008277;GO:0005515;GO:0005829;GO:0004871;GO:0005886;GO:0005096	G-protein coupled receptor signaling pathway;membrane;nucleus;extrinsic component of membrane;heterotrimeric G-protein complex;negative regulation of signal transduction;positive regulation of GTPase activity;intracellular signal transduction;cytoplasm;regulation of G-protein coupled receptor protein signaling pathway;protein binding;cytosol;signal transducer activity;plasma membrane;GTPase activ…	.	.	.	RGS6
ENSG00000115423	1.79513	yes	up	5.59246e-07	yes	chr2	+	84693501	84694500	intron	internal intron	NA	ENST00000389394	0.62427	no	down	0.371375	no	GO:0005929;GO:0042995;GO:0005874;GO:0005524;GO:0003774;GO:0008569;GO:0005737;GO:0005858;GO:0001539;GO:0060271;GO:0030286;GO:0000166;GO:0045503;GO:0016887;GO:0005856;GO:0051959;GO:0045505;GO:0007018;GO:0003777	cilium;cell projection;microtubule;ATP binding;motor activity;minus-end-directed microtubule motor activity;cytoplasm;axonemal dynein complex;cilium or flagellum-dependent cell motility;cilium morphogenesis;dynein complex;nucleotide binding;dynein light chain binding;ATPase activity;cytoskeleton;dynein light intermediate chain binding;dynein intermediate chain binding;microtubule-based movement;m…	ko05016	Huntington's disease	Human Diseases	DNAH6
ENSG00000185920	1.4692	yes	up	0.000142834	yes	chr9	-	95496001	95497000	promoter	Distal	LCP	ENST00000429896	0.621564	no	down	0.374781	no	GO:0010157;GO:0001841;GO:0016020;GO:0043616;GO:0061053;GO:0043433;GO:0007420;GO:0042593;GO:0008158;GO:0016485;GO:0045668;GO:0008201;GO:0007224;GO:0008285;GO:0030332;GO:0009953;GO:0007165;GO:0044294;GO:0060037;GO:0014069;GO:0005119;GO:0008544;GO:0005113;GO:0060644;GO:0005929;GO:0072203;GO:0051782;GO:0014070;GO:0035137;GO:0030666;GO:0030496;GO:0045893;GO:0003007;GO:0045879;GO:0097108;GO:0000122;GO:…	response to chlorate;neural tube formation;membrane;keratinocyte proliferation;somite development;negative regulation of sequence-specific DNA binding transcription factor activity;brain development;glucose homeostasis;hedgehog receptor activity;protein processing;negative regulation of osteoblast differentiation;heparin binding;smoothened signaling pathway;negative regulation of cell proliferati…	ko05217;ko05200;ko04360;ko04024;ko05205;ko04340	Basal cell carcinoma;Pathways in cancer;Axon guidance;cAMP signaling pathway;Proteoglycans in cancer;Hedgehog signaling pathway	Human Diseases;Human Diseases;Organismal Systems;Environmental Information Processing;Human Diseases;Environmental Information Processing	PTCH1
ENSG00000249115	0.526998	yes	down	0.000115809	yes	chr19	+	35618501	35619500	promoter	Intermediate	LCP	ENST00000203166	1.42674	no	up	0.376661	no	GO:0005856;GO:0005815;GO:0007098;GO:0005874;GO:0051225;GO:0005813;GO:0005737;GO:0010389;GO:0070652;GO:0005829;GO:0051301;GO:0005819;GO:0000086;GO:0007049	cytoskeleton;microtubule organizing center;centrosome cycle;microtubule;spindle assembly;centrosome;cytoplasm;regulation of G2/M transition of mitotic cell cycle;HAUS complex;cytosol;cell division;spindle;G2/M transition of mitotic cell cycle;cell cycle	.	.	.	HAUS5
ENSG00000160145	1.96942	yes	up	4.05442e-05	yes	chr3	+	124695501	124696500	intron	internal intron	NA	ENST00000360013	1.43221	no	up	0.378724	no	GO:0007528;GO:0016310;GO:0008344;GO:0046959;GO:0014909;GO:0005085;GO:0005737;GO:1903076;GO:0043065;GO:0004672;GO:0070062;GO:0005856;GO:0009612;GO:0005654;GO:0035176;GO:0007165;GO:0051966;GO:0016301;GO:0030676;GO:0048013;GO:0006468;GO:0014069;GO:0001662;GO:0007266;GO:0016740;GO:0061003;GO:0051056;GO:0060137;GO:0007399;GO:0007595;GO:0005524;GO:0043547;GO:0035556;GO:0016192;GO:0048168;GO:0000166;GO:…	neuromuscular junction development;phosphorylation;adult locomotory behavior;habituation;smooth muscle cell migration;guanyl-nucleotide exchange factor activity;cytoplasm;regulation of protein localization to plasma membrane;positive regulation of apoptotic process;protein kinase activity;extracellular vesicular exosome;cytoskeleton;response to mechanical stimulus;nucleoplasm;social behavior;sign…	.	.	.	KALRN
ENSG00000196653	1.74407	yes	up	1.14908e-08	yes	chr3	+	44711001	44712000	promoter	Intermediate	ICP	ENST00000296091	1.42376	no	up	0.380534	no	GO:0044794;GO:0003677;GO:0005634;GO:0006355;GO:0006351;GO:0003676;GO:0046872;GO:0005515;GO:0044791	positive regulation by host of viral process;DNA binding;nucleus;regulation of transcription, DNA-templated;transcription, DNA-templated;nucleic acid binding;metal ion binding;protein binding;positive regulation by host of viral release from host cell	.	.	.	ZNF502
ENSG00000177830	1.77863	yes	up	0.000602288	yes	chr11	-	914001	915000	exon	first exon	NA	ENST00000436108	0.63143	no	down	0.382177	no	GO:0016020;GO:0005615;GO:0005770;GO:0002576;GO:0006032;GO:0008061;GO:0002376;GO:0005515;GO:0004568;GO:0043202;GO:0005975;GO:0005576;GO:0045087;GO:0070062;GO:0005634;GO:0005764;GO:1900016;GO:0070492;GO:0005802	membrane;extracellular space;late endosome;platelet degranulation;chitin catabolic process;chitin binding;immune system process;protein binding;chitinase activity;lysosomal lumen;carbohydrate metabolic process;extracellular region;innate immune response;extracellular vesicular exosome;nucleus;lysosome;negative regulation of cytokine production involved in inflammatory response;oligosaccharide bin…	.	.	.	CHID1
ENSG00000197362	0.706166	yes	down	0.00024681	yes	chr7	-	149080501	149081500	intron	first intron	NA	ENST00000491431	1.45915	no	up	0.382428	no	GO:0003677;GO:0046872;GO:0005634;GO:0006355;GO:0005622;GO:0006351;GO:0003676	DNA binding;metal ion binding;nucleus;regulation of transcription, DNA-templated;intracellular;transcription, DNA-templated;nucleic acid binding	.	.	.	ZNF786
ENSG00000176715	0.453496	yes	down	4.52187e-06	yes	chr16	+	89123501	89124500	downstream	NA	NA	ENST00000406948	0.633187	no	down	0.382725	no	GO:0005759;GO:0005524;GO:0008152;GO:0090410;GO:0003824;GO:0016874;GO:0090409;GO:0000166;GO:0006631;GO:0035338;GO:0006633;GO:0005739;GO:0031957;GO:0016878;GO:0006629	mitochondrial matrix;ATP binding;metabolic process;malonate catabolic process;catalytic activity;ligase activity;malonyl-CoA synthetase activity;nucleotide binding;fatty acid metabolic process;long-chain fatty-acyl-CoA biosynthetic process;fatty acid biosynthetic process;mitochondrion;very long-chain fatty acid-CoA ligase activity;acid-thiol ligase activity;lipid metabolic process	ko00280	Valine, leucine and isoleucine degradation	Metabolism	ACSF3
ENSG00000118420	2.27439	yes	up	0.000472891	yes	chr6	-	83049001	83050000	intron	internal intron	NA	ENST00000369747	0.625941	no	down	0.38287	no	GO:0061630;GO:0044390;GO:0006513;GO:0016567;GO:0005737;GO:0000151;GO:0051865;GO:0016740;GO:0030332;GO:0000209	ubiquitin protein ligase activity;small protein conjugating enzyme binding;protein monoubiquitination;protein ubiquitination;cytoplasm;ubiquitin ligase complex;protein autoubiquitination;transferase activity;cyclin binding;protein polyubiquitination	.	.	.	UBE3D
ENSG00000142235	2.92308	yes	up	1.12553e-07	yes	chr19	-	48501001	48502000	intron	internal intron	NA	ENST00000600059	1.42647	no	up	0.384022	no	GO:0030425;GO:0016020;GO:0042995;GO:0016310;GO:0005524;GO:0000139;GO:0000166;GO:0004672;GO:0010923;GO:0016021;GO:0030424;GO:0016301;GO:0006468;GO:0046872;GO:0004674;GO:0005794;GO:0016740	dendrite;membrane;cell projection;phosphorylation;ATP binding;Golgi membrane;nucleotide binding;protein kinase activity;negative regulation of phosphatase activity;integral component of membrane;axon;kinase activity;protein phosphorylation;metal ion binding;protein serine/threonine kinase activity;Golgi apparatus;transferase activity	.	.	.	LMTK3
ENSG00000110237	1.64015	yes	up	5.95724e-08	yes	chr11	+	73362001	73363000	intron	internal intron	NA	ENST00000263674	1.4462	no	up	0.384323	no	GO:0043065;GO:0030036;GO:0005829;GO:0005085;GO:0043547;GO:0035023;GO:0051056;GO:0005089	positive regulation of apoptotic process;actin cytoskeleton organization;cytosol;guanyl-nucleotide exchange factor activity;positive regulation of GTPase activity;regulation of Rho protein signal transduction;regulation of small GTPase mediated signal transduction;Rho guanyl-nucleotide exchange factor activity	.	.	.	ARHGEF17
ENSG00000177707	3.32941	yes	up	5.67812e-06	yes	chr3	+	111147001	111148000	intron	internal intron	NA	ENST00000485303	0.623589	no	down	0.384349	no	GO:0016020;GO:0002089;GO:0044291;GO:0030054;GO:0046982;GO:0060042;GO:0005102;GO:0005913;GO:0005887;GO:0005515;GO:0005911;GO:0016021;GO:0043296;GO:0008037;GO:0045202;GO:0005886;GO:0045211;GO:0050839;GO:0016337;GO:0009566;GO:0004872;GO:0007286;GO:0007157;GO:0042803;GO:0034332;GO:0007155;GO:1902414;GO:0007156	membrane;lens morphogenesis in camera-type eye;cell-cell contact zone;cell junction;protein heterodimerization activity;retina morphogenesis in camera-type eye;receptor binding;cell-cell adherens junction;integral component of plasma membrane;protein binding;cell-cell junction;integral component of membrane;apical junction complex;cell recognition;synapse;plasma membrane;postsynaptic membrane;cel…	ko04514;ko04520	Cell adhesion molecules (CAMs);Adherens junction	Environmental Information Processing;Cellular Processes	NECTIN3
ENSG00000158079	0.638261	yes	down	0.000922333	yes	chr9	+	94110001	94111000	downstream	NA	NA	ENST00000375360	0.631161	no	down	0.384988	no	GO:0005634;GO:0005654;GO:0035335;GO:0030030;GO:0004725;GO:0005737;GO:0016791;GO:0060271;GO:0016787;GO:0004721;GO:0008138;GO:0006470;GO:0007224;GO:0016311	nucleus;nucleoplasm;peptidyl-tyrosine dephosphorylation;cell projection organization;protein tyrosine phosphatase activity;cytoplasm;phosphatase activity;cilium morphogenesis;hydrolase activity;phosphoprotein phosphatase activity;protein tyrosine/serine/threonine phosphatase activity;protein dephosphorylation;smoothened signaling pathway;dephosphorylation	.	.	.	PTPDC1
ENSG00000180891	0.47491	yes	down	0.000136459	yes	chr17	-	57879001	57880000	intron	internal intron	NA	ENST00000577830	1.40775	no	up	0.386762	no	.	.	.	.	.	CUEDC1
ENSG00000197275	0.382716	yes	down	7.52783e-07	yes	chr8	-	94378501	94379500	intron	internal intron	NA	ENST00000336148	0.618458	no	down	0.387275	no	GO:0015616;GO:0003677;GO:0005634;GO:0006281;GO:0005524;GO:0003724;GO:0004386;GO:0032508;GO:0007131;GO:0016787;GO:0005515;GO:0000166;GO:0006312;GO:0000724;GO:0003678;GO:0006974	DNA translocase activity;DNA binding;nucleus;DNA repair;ATP binding;RNA helicase activity;helicase activity;DNA duplex unwinding;reciprocal meiotic recombination;hydrolase activity;protein binding;nucleotide binding;mitotic recombination;double-strand break repair via homologous recombination;DNA helicase activity;cellular response to DNA damage stimulus	ko03440	Homologous recombination	Genetic Information Processing	RAD54B
ENSG00000111196	1.39736	yes	up	0.000727732	yes	chr12	-	10603001	10604000	downstream	NA	NA	ENST00000320756	1.45219	no	up	0.388341	no	GO:0006406;GO:0003723;GO:0031124;GO:0006369;GO:0006405;GO:0051028;GO:0043025;GO:0005515;GO:0006397;GO:0006810;GO:0005634;GO:0005654;GO:0000398;GO:0000184;GO:0071013;GO:0035145;GO:0008380	mRNA export from nucleus;RNA binding;mRNA 3'-end processing;termination of RNA polymerase II transcription;RNA export from nucleus;mRNA transport;neuronal cell body;protein binding;mRNA processing;transport;nucleus;nucleoplasm;mRNA splicing, via spliceosome;nuclear-transcribed mRNA catabolic process, nonsense-mediated decay;catalytic step 2 spliceosome;exon-exon junction complex;RNA splicing	ko03040;ko03015;ko03013	Spliceosome;mRNA surveillance pathway;RNA transport	Genetic Information Processing;Genetic Information Processing;Genetic Information Processing	MAGOHB
ENSG00000229132	0.122137	yes	down	7.40493e-19	yes	chrX	-	92114501	92115500	promoter	Distal	LCP	ENST00000428832	0.622721	no	down	0.388732	no	.	.	.	.	.	EIF4A1P10
ENSG00000254521	0.426573	yes	down	0.000569882	yes	chr19	-	51503001	51504000	promoter	Distal	LCP	ENST00000596742	1.42533	no	up	0.390029	no	GO:0016020;GO:0007155;GO:0030246;GO:0016021	membrane;cell adhesion;carbohydrate binding;integral component of membrane	.	.	.	SIGLEC12
ENSG00000189195	1.8369	yes	up	0.000259319	yes	chr1	+	92168001	92169000	intron	first intron	NA	ENST00000636805	1.41434	no	up	0.392097	no	.	.	.	.	.	AC104836.1
ENSG00000019485	0.45525	yes	down	2.71114e-05	yes	chr11	+	45233001	45234000	exon	last exon	NA	ENST00000622142	0.639096	no	down	0.393596	no	GO:0005634;GO:0006355;GO:0008168;GO:0006351;GO:0016740;GO:0032259;GO:0005737	nucleus;regulation of transcription, DNA-templated;methyltransferase activity;transcription, DNA-templated;transferase activity;methylation;cytoplasm	.	.	.	PRDM11
ENSG00000113494	3.19355	yes	up	1.82265e-05	yes	chr5	-	35196001	35197000	promoter	Distal	LCP	ENST00000618457	1.40192	no	up	0.394742	no	GO:0007171;GO:0007595;GO:0016020;GO:0038161;GO:0042978;GO:0004896;GO:0007166;GO:0007566;GO:0005515;GO:0017046;GO:0016021;GO:0005576;GO:0031904;GO:0060397;GO:0005886;GO:0006694;GO:0042110;GO:0004925;GO:0043066;GO:0042803;GO:0046872;GO:0009986;GO:0042976	activation of transmembrane receptor protein tyrosine kinase activity;lactation;membrane;prolactin signaling pathway;ornithine decarboxylase activator activity;cytokine receptor activity;cell surface receptor signaling pathway;embryo implantation;protein binding;peptide hormone binding;integral component of membrane;extracellular region;endosome lumen;JAK-STAT cascade involved in growth hormone s…	ko04060;ko04080;ko04917;ko04151;ko04630	Cytokine-cytokine receptor interaction;Neuroactive ligand-receptor interaction;Prolactin signaling pathway;PI3K-Akt signaling pathway;Jak-STAT signaling pathway	Environmental Information Processing;Environmental Information Processing;Organismal Systems;Environmental Information Processing;Environmental Information Processing	PRLR
ENSG00000131016	1.73171	yes	up	0.000234687	yes	chr6	+	151305501	151306500	intron	internal intron	NA	ENST00000253332	0.642052	no	down	0.399319	no	GO:0016020;GO:0051018;GO:0090036;GO:0005938;GO:0005737;GO:0005515;GO:0005829;GO:0030819;GO:0005886;GO:0006605;GO:0005856;GO:0007186;GO:0007165;GO:0005925;GO:0010739;GO:0008179	membrane;protein kinase A binding;regulation of protein kinase C signaling;cell cortex;cytoplasm;protein binding;cytosol;positive regulation of cAMP biosynthetic process;plasma membrane;protein targeting;cytoskeleton;G-protein coupled receptor signaling pathway;signal transduction;focal adhesion;positive regulation of protein kinase A signaling;adenylate cyclase binding	.	.	.	AKAP12
ENSG00000114735	0.637168	yes	down	0.000170308	yes	chr3	+	50593501	50594500	exon	last exon	NA	ENST00000455834	0.629033	no	down	0.399519	no	GO:0008757;GO:0003677;GO:0008168;GO:0008276;GO:0006479;GO:0006306;GO:0003676;GO:0005515;GO:0008170;GO:0016740;GO:0005739;GO:0032259	S-adenosylmethionine-dependent methyltransferase activity;DNA binding;methyltransferase activity;protein methyltransferase activity;protein methylation;DNA methylation;nucleic acid binding;protein binding;N-methyltransferase activity;transferase activity;mitochondrion;methylation	.	.	.	HEMK1
ENSG00000173706	1.72242	yes	up	5.98283e-07	yes	chr3	-	125057001	125058000	promoter	Distal	ICP	ENST00000477536	0.641239	no	down	0.401968	no	GO:0030324;GO:0003222;GO:0016020;GO:0003209;GO:0007043;GO:0009897;GO:0050878;GO:0030054;GO:0045216;GO:0001944;GO:0009791;GO:0005515;GO:0005911;GO:0016021;GO:0005576;GO:0001570;GO:0005886;GO:0003281;GO:0003017;GO:0001886;GO:0007507;GO:0001945;GO:0001701;GO:0001885;GO:0035264;GO:0009986;GO:0090271;GO:0007275;GO:0005509;GO:0055017;GO:0048845;GO:0060039	lung development;ventricular trabecula myocardium morphogenesis;membrane;cardiac atrium morphogenesis;cell-cell junction assembly;external side of plasma membrane;regulation of body fluid levels;cell junction;cell-cell junction organization;vasculature development;post-embryonic development;protein binding;cell-cell junction;integral component of membrane;extracellular region;vasculogenesis;plasm…	.	.	.	HEG1
ENSG00000137571	1.68222	yes	up	1.89449e-07	yes	chr8	-	69831501	69832500	promoter	Proximal	ICP	ENST00000260126	1.43062	no	up	0.405821	no	GO:0043252;GO:0016020;GO:0006810;GO:0005887;GO:0016021;GO:0005886;GO:0015347;GO:0005215	sodium-independent organic anion transport;membrane;transport;integral component of plasma membrane;integral component of membrane;plasma membrane;sodium-independent organic anion transmembrane transporter activity;transporter activity	.	.	.	SLCO5A1
ENSG00000143195	2.51829	yes	up	1.46188e-05	yes	chr1	-	166922501	166923500	intron	internal intron	NA	ENST00000271417	0.632146	no	down	0.405963	no	GO:0016020;GO:0005783;GO:0030154;GO:0048873;GO:0030073;GO:0031016;GO:0016021;GO:0009749;GO:0005789	membrane;endoplasmic reticulum;cell differentiation;homeostasis of number of cells within a tissue;insulin secretion;pancreas development;integral component of membrane;response to glucose;endoplasmic reticulum membrane	.	.	.	ILDR2
ENSG00000169914	1.41092	yes	up	0.00105922	yes	chr1	+	19907501	19908500	downstream	NA	NA	ENST00000375120	0.64738	no	down	0.406198	no	GO:1990167;GO:0071108;GO:0004843;GO:0044313;GO:0008233;GO:0036459;GO:0005737;GO:0016787;GO:0008234;GO:0006508;GO:0005829;GO:0016579;GO:0050821;GO:0051898;GO:0035871	protein K27-linked deubiquitination;protein K48-linked deubiquitination;ubiquitin-specific protease activity;protein K6-linked deubiquitination;peptidase activity;ubiquitinyl hydrolase activity;cytoplasm;hydrolase activity;cysteine-type peptidase activity;proteolysis;cytosol;protein deubiquitination;protein stabilization;negative regulation of protein kinase B signaling;protein K11-linked deubiqu…	.	.	.	OTUD3
ENSG00000122778	1.51832	yes	up	0.000177407	yes	chr7	-	138912001	138913000	intron	internal intron	NA	ENST00000440172	1.42628	no	up	0.408057	no	GO:0016020;GO:0016021;GO:0005886	membrane;integral component of membrane;plasma membrane	.	.	.	KIAA1549
ENSG00000196275	1.72182	yes	up	0.000313511	yes	chr7	-	74798001	74799000	downstream	NA	NA	ENST00000484624	0.634042	no	down	0.408203	no	GO:0005654;GO:0000981;GO:0003677;GO:0005634;GO:0006355;GO:0006351;GO:0005737;GO:0003676;GO:0006357;GO:0005515;GO:0007275	nucleoplasm;sequence-specific DNA binding RNA polymerase II transcription factor activity;DNA binding;nucleus;regulation of transcription, DNA-templated;transcription, DNA-templated;cytoplasm;nucleic acid binding;regulation of transcription from RNA polymerase II promoter;protein binding;multicellular organismal development	.	.	.	GTF2IRD2
ENSG00000123453	0.612583	yes	down	0.000555415	yes	chr9	-	133718001	133719000	exon	internal exon	NA	ENST00000371872	0.640989	no	down	0.410501	no	GO:0005759;GO:0008480;GO:1901053;GO:0042426;GO:0005739;GO:0055114;GO:0016491	mitochondrial matrix;sarcosine dehydrogenase activity;sarcosine catabolic process;choline catabolic process;mitochondrion;oxidation-reduction process;oxidoreductase activity	ko00260	Glycine, serine and threonine metabolism	Metabolism	SARDH
ENSG00000168566	0.511811	yes	down	3.33026e-07	yes	chr6	+	7611501	7612500	downstream	NA	NA	ENST00000496946	1.38763	no	up	0.411523	no	GO:0006397;GO:0005654;GO:0005634;GO:0000398;GO:0003676;GO:0046872;GO:0005681;GO:0005829;GO:0005689;GO:0008380	mRNA processing;nucleoplasm;nucleus;mRNA splicing, via spliceosome;nucleic acid binding;metal ion binding;spliceosomal complex;cytosol;U12-type spliceosomal complex;RNA splicing	.	.	.	SNRNP48
ENSG00000158555	2.44269	yes	up	1.77705e-05	yes	chr11	-	75526001	75527000	promoter	Distal	ICP	ENST00000336898	0.650054	no	down	0.412601	no	GO:0007399;GO:0016020;GO:0042995;GO:0097038;GO:0045666;GO:0008889;GO:0005737;GO:0043025;GO:0012505;GO:0030426;GO:0016787;GO:0005515;GO:0031175;GO:0016021;GO:0030424;GO:0021895;GO:0048471;GO:0048505;GO:0008081;GO:0047389;GO:0045746;GO:0021522;GO:0045787;GO:0006629	nervous system development;membrane;cell projection;perinuclear endoplasmic reticulum;positive regulation of neuron differentiation;glycerophosphodiester phosphodiesterase activity;cytoplasm;neuronal cell body;endomembrane system;growth cone;hydrolase activity;protein binding;neuron projection development;integral component of membrane;axon;cerebral cortex neuron differentiation;perinuclear regio…	.	.	.	GDPD5
ENSG00000169891	2.41791	yes	up	0.000441002	yes	chrX	+	16947001	16948000	intron	first intron	NA	ENST00000303843	1.37745	no	up	0.413037	no	GO:0005737;GO:0061024;GO:0046872;GO:0005515;GO:0005509;GO:0005829;GO:0007173;GO:0006461	cytoplasm;membrane organization;metal ion binding;protein binding;calcium ion binding;cytosol;epidermal growth factor receptor signaling pathway;protein complex assembly	.	.	.	REPS2
ENSG00000183741	0.671091	yes	down	0.000128002	yes	chr22	-	38867001	38868000	downstream	NA	NA	ENST00000407418	0.651479	no	down	0.413792	no	GO:0005654;GO:0005634;GO:0006355;GO:0006351;GO:0000122;GO:0005515;GO:0031519;GO:0016569;GO:0000792;GO:0003727	nucleoplasm;nucleus;regulation of transcription, DNA-templated;transcription, DNA-templated;negative regulation of transcription from RNA polymerase II promoter;protein binding;PcG protein complex;covalent chromatin modification;heterochromatin;single-stranded RNA binding	.	.	.	CBX6
ENSG00000167393	0.181416	yes	down	5.31113e-09	yes	chrX	-	373001	374000	exon	first exon	NA	ENST00000477110	0.639848	no	down	0.414278	no	GO:0005654;GO:0005634;GO:0019888;GO:0007050;GO:0004722;GO:0050790;GO:0046872;GO:0005515;GO:0004721;GO:0005509;GO:0006470;GO:0000159	nucleoplasm;nucleus;protein phosphatase regulator activity;cell cycle arrest;protein serine/threonine phosphatase activity;regulation of catalytic activity;metal ion binding;protein binding;phosphoprotein phosphatase activity;calcium ion binding;protein dephosphorylation;protein phosphatase type 2A complex	ko04261;ko04152;ko05165;ko04728;ko04151;ko03015;ko04071	Adrenergic signaling in cardiomyocytes;AMPK signaling pathway;Human papillomavirus infection;Dopaminergic synapse;PI3K-Akt signaling pathway;mRNA surveillance pathway;Sphingolipid signaling pathway	Organismal Systems;Environmental Information Processing;Human Diseases;Organismal Systems;Environmental Information Processing;Genetic Information Processing;Environmental Information Processing	PPP2R3B
ENSG00000105429	1.64433	yes	up	5.16368e-05	yes	chr19	+	42333001	42334000	intron	internal intron	NA	ENST00000334370	0.646805	no	down	0.416571	no	GO:0016020;GO:0010468;GO:0055113;GO:0003143;GO:0097155;GO:0061371;GO:0005515;GO:0060971;GO:0016021;GO:0048842;GO:0060972;GO:0042074;GO:0060976;GO:0070062;GO:0005634;GO:0007368;GO:0071907;GO:0030509;GO:0035108;GO:0030326;GO:0005509;GO:0048704;GO:0097094	membrane;regulation of gene expression;epiboly involved in gastrulation with mouth forming second;embryonic heart tube morphogenesis;fasciculation of sensory neuron axon;determination of heart left/right asymmetry;protein binding;embryonic heart tube left/right pattern formation;integral component of membrane;positive regulation of axon extension involved in axon guidance;left/right pattern forma…	.	.	.	MEGF8
ENSG00000152147	1.51413	yes	up	9.11537e-05	yes	chr2	+	38749001	38750000	promoter	Distal	HCP	ENST00000281950	1.37607	no	up	0.417758	no	GO:0006397;GO:0034719;GO:0032797;GO:0005654;GO:0005634;GO:0000398;GO:0051170;GO:0005737;GO:0005515;GO:0097504;GO:0005829;GO:0016604;GO:0000245;GO:0008380;GO:0000387	mRNA processing;SMN-Sm protein complex;SMN complex;nucleoplasm;nucleus;mRNA splicing, via spliceosome;nuclear import;cytoplasm;protein binding;Gemini of coiled bodies;cytosol;nuclear body;spliceosomal complex assembly;RNA splicing;spliceosomal snRNP assembly	ko03013	RNA transport	Genetic Information Processing	GEMIN6
ENSG00000125247	0.427992	yes	down	8.28099e-05	yes	chr13	-	100675001	100676000	promoter	Distal	HCP	ENST00000342624	1.38127	no	up	0.420101	no	GO:0016020;GO:0016021	membrane;integral component of membrane	.	.	.	TMTC4
ENSG00000142303	1.94256	yes	up	0.000131903	yes	chr19	-	8611501	8612500	promoter	Distal	LCP	ENST00000603221	0.646061	no	down	0.420347	no	GO:0031012;GO:0004222;GO:0008233;GO:0005578;GO:0046872;GO:0005515;GO:0008237;GO:0016787;GO:0006508;GO:0001527;GO:0008270;GO:0005576	extracellular matrix;metalloendopeptidase activity;peptidase activity;proteinaceous extracellular matrix;metal ion binding;protein binding;metallopeptidase activity;hydrolase activity;proteolysis;microfibril;zinc ion binding;extracellular region	.	.	.	ADAMTS10
ENSG00000102024	0.705314	yes	down	0.000720881	yes	chrX	+	115610501	115611500	intron	internal intron	NA	ENST00000355899	1.4049	no	up	0.420849	no	GO:0051015;GO:0060348;GO:0051639;GO:0051764;GO:0005737;GO:0005884;GO:0003779;GO:0046872;GO:0051017;GO:0005829;GO:0005509;GO:0032432;GO:0005886	actin filament binding;bone development;actin filament network formation;actin crosslink formation;cytoplasm;actin filament;actin binding;metal ion binding;actin filament bundle assembly;cytosol;calcium ion binding;actin filament bundle;plasma membrane	.	.	.	PLS3
ENSG00000186866	1.67302	yes	up	5.86886e-06	yes	chr21	-	45289501	45290500	promoter	Distal	ICP	ENST00000331343	0.651508	no	down	0.421186	no	GO:0010468;GO:0008417;GO:0006486;GO:0005783;GO:0010717;GO:0036065;GO:0046922;GO:0001707;GO:0051046;GO:0016757;GO:0005794;GO:0005975;GO:0036066;GO:0016740;GO:0005789;GO:0006004	regulation of gene expression;fucosyltransferase activity;protein glycosylation;endoplasmic reticulum;regulation of epithelial to mesenchymal transition;fucosylation;peptide-O-fucosyltransferase activity;mesoderm formation;regulation of secretion;transferase activity, transferring glycosyl groups;Golgi apparatus;carbohydrate metabolic process;protein O-linked fucosylation;transferase activity;end…	ko00514	Other types of O-glycan biosynthesis	Metabolism	POFUT2
ENSG00000175592	0.409613	yes	down	0.000175874	yes	chr11	-	65899001	65900000	promoter	Proximal	ICP	ENST00000312562	0.639971	no	down	0.42182	no	GO:0001077;GO:0032570;GO:0009629;GO:0007296;GO:0043065;GO:0061614;GO:0005515;GO:0042734;GO:0003700;GO:0060674;GO:0008285;GO:0042493;GO:0009612;GO:0007565;GO:0005654;GO:0000978;GO:2000144;GO:0043005;GO:0045944;GO:0000977;GO:0051412;GO:0045787;GO:0003677;GO:0014070;GO:0006355;GO:0034097;GO:0006357;GO:0051091;GO:0005829;GO:0006935;GO:0031668;GO:0043231;GO:0005634;GO:0051591;GO:0001701;GO:0007612;GO:…	RNA polymerase II core promoter proximal region sequence-specific DNA binding transcription factor activity involved in positive regulation of transcription;response to progesterone;response to gravity;vitellogenesis;positive regulation of apoptotic process;pri-miRNA transcription from RNA polymerase II promoter;protein binding;presynaptic membrane;sequence-specific DNA binding transcription fact…	ko04380;ko04310;ko04657;ko05166	Osteoclast differentiation;Wnt signaling pathway;IL-17 signaling pathway;HTLV-I infection	Organismal Systems;Environmental Information Processing;Organismal Systems;Human Diseases	FOSL1
ENSG00000185920	1.4692	yes	up	0.000142834	yes	chr9	-	95496001	95497000	promoter	Distal	LCP	ENST00000375290	0.650615	no	down	0.423929	no	GO:0010157;GO:0001841;GO:0016020;GO:0043616;GO:0061053;GO:0043433;GO:0007420;GO:0042593;GO:0008158;GO:0016485;GO:0045668;GO:0008201;GO:0007224;GO:0008285;GO:0030332;GO:0009953;GO:0007165;GO:0044294;GO:0060037;GO:0014069;GO:0005119;GO:0008544;GO:0005113;GO:0060644;GO:0005929;GO:0072203;GO:0051782;GO:0014070;GO:0035137;GO:0030666;GO:0030496;GO:0045893;GO:0003007;GO:0045879;GO:0097108;GO:0000122;GO:…	response to chlorate;neural tube formation;membrane;keratinocyte proliferation;somite development;negative regulation of sequence-specific DNA binding transcription factor activity;brain development;glucose homeostasis;hedgehog receptor activity;protein processing;negative regulation of osteoblast differentiation;heparin binding;smoothened signaling pathway;negative regulation of cell proliferati…	ko05217;ko05200;ko04360;ko04024;ko05205;ko04340	Basal cell carcinoma;Pathways in cancer;Axon guidance;cAMP signaling pathway;Proteoglycans in cancer;Hedgehog signaling pathway	Human Diseases;Human Diseases;Organismal Systems;Environmental Information Processing;Human Diseases;Environmental Information Processing	PTCH1
ENSG00000157240	1.47406	yes	up	8.62942e-06	yes	chr7	+	91265501	91266500	exon	first exon	NA	ENST00000287934	1.36766	no	up	0.424088	no	GO:0016020;GO:0060412;GO:0044339;GO:0005102;GO:0017147;GO:0007166;GO:0003149;GO:0044338;GO:0005109;GO:0005515;GO:0042813;GO:0004888;GO:0004871;GO:0045892;GO:0035567;GO:0042493;GO:1903204;GO:0007165;GO:0005925;GO:0060022;GO:0003151;GO:0003150;GO:0060070;GO:0035414;GO:0007275;GO:0016055;GO:0030514;GO:0004930;GO:0045893;GO:0051091;GO:0016021;GO:0001934;GO:0030165;GO:0005886;GO:0007186;GO:0030182;GO:…	membrane;ventricular septum morphogenesis;canonical Wnt signaling pathway involved in osteoblast differentiation;receptor binding;Wnt-protein binding;cell surface receptor signaling pathway;membranous septum morphogenesis;canonical Wnt signaling pathway involved in mesenchymal stem cell differentiation;frizzled binding;protein binding;Wnt-activated receptor activity;transmembrane signaling recept…	ko05217;ko05224;ko04150;ko05225;ko05165;ko04390;ko04550;ko05200;ko04310;ko05205;ko04916;ko05166;ko05226	Basal cell carcinoma;Breast cancer;mTOR signaling pathway;Hepatocellular carcinoma;Human papillomavirus infection;Hippo signaling pathway;Signaling pathways regulating pluripotency of stem cells;Pathways in cancer;Wnt signaling pathway;Proteoglycans in cancer;Melanogenesis;HTLV-I infection;Gastric cancer	Human Diseases;Human Diseases;Environmental Information Processing;Human Diseases;Human Diseases;Environmental Information Processing;Cellular Processes;Human Diseases;Environmental Information Processing;Human Diseases;Organismal Systems;Human Diseases;Human Diseases	FZD1
ENSG00000196155	0.715332	yes	down	0.000115969	yes	chr16	+	67284001	67285000	intron	internal intron	NA	ENST00000563969	0.650532	no	down	0.425635	no	GO:0005515;GO:0005085;GO:0035023;GO:0005089	protein binding;guanyl-nucleotide exchange factor activity;regulation of Rho protein signal transduction;Rho guanyl-nucleotide exchange factor activity	.	.	.	PLEKHG4
ENSG00000111911	0.411765	yes	down	0.000438849	yes	chr6	+	125954501	125955500	promoter	Distal	ICP	ENST00000229633	0.655096	no	down	0.427154	no	GO:0070062;GO:0005634;GO:0016787;GO:0000166;GO:0003824;GO:0005737	extracellular vesicular exosome;nucleus;hydrolase activity;nucleotide binding;catalytic activity;cytoplasm	.	.	.	HINT3
ENSG00000165338	2.41057	yes	up	3.85801e-05	yes	chr10	+	91464501	91465500	downstream	NA	NA	ENST00000446394	0.640076	no	down	0.427232	no	GO:0061630;GO:0005829;GO:0016567;GO:0016740;GO:0005737;GO:0000209;GO:0004842	ubiquitin protein ligase activity;cytosol;protein ubiquitination;transferase activity;cytoplasm;protein polyubiquitination;ubiquitin-protein transferase activity	.	.	.	HECTD2
ENSG00000158352	1.51163	yes	up	0.000221723	yes	chrX	-	50814001	50815000	promoter	Intermediate	LCP	ENST00000376020	1.3732	no	up	0.427658	no	GO:0051015;GO:0016324;GO:0007420;GO:0005737;GO:0007015;GO:0030864;GO:0015629;GO:0009898;GO:0005856;GO:0030036;GO:0016460;GO:0009925;GO:0003779;GO:0050890;GO:0001725;GO:0007275;GO:0031941	actin filament binding;apical plasma membrane;brain development;cytoplasm;actin filament organization;cortical actin cytoskeleton;actin cytoskeleton;cytoplasmic side of plasma membrane;cytoskeleton;actin cytoskeleton organization;myosin II complex;basal plasma membrane;actin binding;cognition;stress fiber;multicellular organismal development;filamentous actin	.	.	.	SHROOM4
ENSG00000186193	0.616867	yes	down	0.000109072	yes	chr9	-	137072001	137073000	promoter	Distal	LCP	ENST00000409687	1.36478	no	up	0.428605	no	GO:0005634;GO:0005730;GO:0005829;GO:0005737	nucleus;nucleolus;cytosol;cytoplasm	.	.	.	SAPCD2
ENSG00000102221	0.629701	yes	down	0.000295778	yes	chrX	+	46912501	46913500	intron	first intron	NA	ENST00000614628	1.37166	no	up	0.428654	no	GO:0046872;GO:0043966;GO:0043982;GO:0005515;GO:0043981;GO:0043983;GO:0000123	metal ion binding;histone H3 acetylation;histone H4-K8 acetylation;protein binding;histone H4-K5 acetylation;histone H4-K12 acetylation;histone acetyltransferase complex	.	.	.	JADE3
ENSG00000151876	1.37598	yes	up	0.000629468	yes	chr5	+	41930501	41931500	downstream	NA	NA	ENST00000281623	1.3743	no	up	0.429147	no	GO:0043687;GO:0031146;GO:0016567;GO:0010608;GO:0005737;GO:1902916;GO:0019005;GO:0019725;GO:0032212;GO:0005515;GO:0005829;GO:0031648;GO:0000209;GO:0061630;GO:2000001;GO:0031398;GO:0048147;GO:0042803;GO:0004842;GO:0007568;GO:0035726;GO:0071479;GO:0000151;GO:0031647;GO:1900181	post-translational protein modification;SCF-dependent proteasomal ubiquitin-dependent protein catabolic process;protein ubiquitination;posttranscriptional regulation of gene expression;cytoplasm;positive regulation of protein polyubiquitination;SCF ubiquitin ligase complex;cellular homeostasis;positive regulation of telomere maintenance via telomerase;protein binding;cytosol;protein destabilizati…	ko04120	Ubiquitin mediated proteolysis	Genetic Information Processing	FBXO4
ENSG00000160957	-inf	yes	down	3.30801e-12	yes	chr8	-	144517501	144518500	promoter	Intermediate	ICP	ENST00000621189	1.36857	no	up	0.429433	no	GO:0005524;GO:0006310;GO:0008026;GO:0003676	ATP binding;DNA recombination;ATP-dependent helicase activity;nucleic acid binding	.	.	.	RECQL4
ENSG00000125351	1.41051	yes	up	0.000746208	yes	chrX	-	119822001	119823000	exon	internal exon	NA	ENST00000345865	0.658621	no	down	0.429688	no	GO:0006406;GO:0003723;GO:0005487;GO:0031124;GO:0006369;GO:0045727;GO:0005737;GO:0006405;GO:0051028;GO:0005730;GO:0005515;GO:0005829;GO:0006810;GO:0005634;GO:0005815;GO:0003729;GO:0005654;GO:0000398;GO:0000184;GO:0003676;GO:0035145	mRNA export from nucleus;RNA binding;nucleocytoplasmic transporter activity;mRNA 3'-end processing;termination of RNA polymerase II transcription;positive regulation of translation;cytoplasm;RNA export from nucleus;mRNA transport;nucleolus;protein binding;cytosol;transport;nucleus;microtubule organizing center;mRNA binding;nucleoplasm;mRNA splicing, via spliceosome;nuclear-transcribed mRNA catabo…	ko03015;ko03013	mRNA surveillance pathway;RNA transport	Genetic Information Processing;Genetic Information Processing	UPF3B
ENSG00000176155	0.671642	yes	down	0.00031921	yes	chr17	-	82185501	82186500	downstream	NA	NA	ENST00000392346	0.652183	no	down	0.429757	no	GO:0005515	protein binding	.	.	.	CCDC57
ENSG00000148468	2.44681	yes	up	0.000827859	yes	chr10	-	15209001	15210000	downstream	NA	NA	ENST00000378116	0.652846	no	down	0.429916	no	GO:0070062;GO:0016020;GO:0016021	extracellular vesicular exosome;membrane;integral component of membrane	.	.	.	FAM171A1
ENSG00000154655	1.60767	yes	up	2.18395e-05	yes	chr18	-	6239001	6240000	intron	last intron	NA	ENST00000317931	0.656429	no	down	0.430827	no	GO:0046872;GO:0005634;GO:0005515;GO:0016569;GO:0006355;GO:0008270;GO:0006351;GO:0003700	metal ion binding;nucleus;protein binding;covalent chromatin modification;regulation of transcription, DNA-templated;zinc ion binding;transcription, DNA-templated;sequence-specific DNA binding transcription factor activity	.	.	.	L3MBTL4
ENSG00000139197	1.94402	yes	up	6.56561e-05	yes	chr12	+	7188001	7189000	intron	first intron	NA	ENST00000434354	0.642028	no	down	0.431105	no	GO:0016020;GO:0016560;GO:0047485;GO:0007006;GO:0005737;GO:0021795;GO:0005052;GO:1901094;GO:0000268;GO:0044255;GO:0005515;GO:0016558;GO:0048468;GO:0015031;GO:0005778;GO:0007031;GO:0021895;GO:0007005;GO:0001764;GO:0031267;GO:0016567;GO:0005777;GO:0006635;GO:0005829;GO:0005739;GO:0006810;GO:0000038;GO:0005794;GO:0043234;GO:0045046;GO:0040018;GO:0050905;GO:0019899;GO:0007029	membrane;protein import into peroxisome matrix, docking;protein N-terminus binding;mitochondrial membrane organization;cytoplasm;cerebral cortex cell migration;peroxisome matrix targeting signal-1 binding;negative regulation of protein homotetramerization;peroxisome targeting sequence binding;cellular lipid metabolic process;protein binding;protein import into peroxisome matrix;cell development;p…	ko04146	Peroxisome	Cellular Processes	PEX5
ENSG00000168758	1.70545	yes	up	8.03019e-06	yes	chr2	-	96862501	96863500	downstream	NA	NA	ENST00000482925	0.660587	no	down	0.433777	no	GO:0007399;GO:0016020;GO:0005615;GO:0031410;GO:0030054;GO:0050919;GO:0005515;GO:0030672;GO:0016021;GO:0005886;GO:0045202;GO:0045211;GO:0021549;GO:0030154;GO:0032874;GO:0014069;GO:0021535;GO:0042692;GO:0007275;GO:0001843;GO:0071526	nervous system development;membrane;extracellular space;cytoplasmic vesicle;cell junction;negative chemotaxis;protein binding;synaptic vesicle membrane;integral component of membrane;plasma membrane;synapse;postsynaptic membrane;cerebellum development;cell differentiation;positive regulation of stress-activated MAPK cascade;postsynaptic density;cell migration in hindbrain;muscle cell differentiat…	ko04360	Axon guidance	Organismal Systems	SEMA4C
ENSG00000154237	1.18277	yes	up	5.34939e-05	yes	chr15	+	101077501	101078500	downstream	NA	NA	ENST00000388948	0.661474	no	down	0.433824	no	GO:0050731;GO:0016310;GO:0005524;GO:0035556;GO:0005737;GO:1902533;GO:0005515;GO:0005829;GO:0007264;GO:0000166;GO:0004672;GO:0050732;GO:0004871;GO:0005739;GO:0045453;GO:0016301;GO:0042802;GO:0006468;GO:0090263;GO:0046872;GO:0004674;GO:0005525;GO:0016740;GO:0036035	positive regulation of peptidyl-tyrosine phosphorylation;phosphorylation;ATP binding;intracellular signal transduction;cytoplasm;positive regulation of intracellular signal transduction;protein binding;cytosol;small GTPase mediated signal transduction;nucleotide binding;protein kinase activity;negative regulation of peptidyl-tyrosine phosphorylation;signal transducer activity;mitochondrion;bone r…	.	.	.	LRRK1
ENSG00000114739	1.62248	yes	up	0.000364685	yes	chr3	+	38476501	38477500	intron	first intron	NA	ENST00000352511	0.662299	no	down	0.434057	no	GO:0016020;GO:0048617;GO:0016310;GO:0019838;GO:0030073;GO:0060836;GO:0005737;GO:0007389;GO:0009791;GO:0005887;GO:0005515;GO:0004672;GO:0009749;GO:0004702;GO:0035265;GO:0007368;GO:0001702;GO:0007165;GO:0007507;GO:0016301;GO:0032147;GO:0006468;GO:0007178;GO:0030509;GO:0032924;GO:0042475;GO:0001974;GO:0009966;GO:0061298;GO:0016740;GO:0030324;GO:0009952;GO:0023014;GO:0001822;GO:0048185;GO:0016362;GO:…	membrane;embryonic foregut morphogenesis;phosphorylation;growth factor binding;insulin secretion;lymphatic endothelial cell differentiation;cytoplasm;pattern specification process;post-embryonic development;integral component of plasma membrane;protein binding;protein kinase activity;response to glucose;receptor signaling protein serine/threonine kinase activity;organ growth;determination of left…	ko04060;ko05418;ko04350;ko04550	Cytokine-cytokine receptor interaction;Fluid shear stress and atherosclerosis;TGF-beta signaling pathway;Signaling pathways regulating pluripotency of stem cells	Environmental Information Processing;Human Diseases;Environmental Information Processing;Cellular Processes	ACVR2B
ENSG00000134765	1.69739	yes	up	0.000244468	yes	chr18	-	31128501	31129500	exon	last exon	NA	ENST00000257197	0.656861	no	down	0.434337	no	GO:0070062;GO:0016020;GO:0005921;GO:0001533;GO:0030054;GO:0031424;GO:0070268;GO:0046872;GO:0007155;GO:0005509;GO:0007156;GO:0043312;GO:0016021;GO:0005886;GO:0030057	extracellular vesicular exosome;membrane;gap junction;cornified envelope;cell junction;keratinization;cornification;metal ion binding;cell adhesion;calcium ion binding;homophilic cell adhesion via plasma membrane adhesion molecules;neutrophil degranulation;integral component of membrane;plasma membrane;desmosome	.	.	.	DSC1
ENSG00000141560	1.45724	yes	up	8.36215e-05	yes	chr17	+	82729001	82730000	exon	last exon	NA	ENST00000269373	1.36434	no	up	0.434418	no	GO:0043687;GO:0016310;GO:0005829;GO:0016301;GO:0016740	post-translational protein modification;phosphorylation;cytosol;kinase activity;transferase activity	.	.	.	FN3KRP
ENSG00000138778	0.384615	yes	down	2.99313e-05	yes	chr4	-	103175501	103176500	intron	internal intron	NA	ENST00000265148	0.658764	no	down	0.435654	no	GO:0016020;GO:0005874;GO:0003774;GO:0005737;GO:0007080;GO:0005515;GO:0005623;GO:0000940;GO:0051310;GO:0030071;GO:0000777;GO:0016887;GO:0005856;GO:0015630;GO:0005694;GO:0008017;GO:0043515;GO:0007079;GO:0007275;GO:0003777;GO:0000776;GO:0000278;GO:0005524;GO:0007059;GO:0000779;GO:1990023;GO:0030496;GO:0005829;GO:0000166;GO:0045860;GO:0005819;GO:0051382;GO:0005871;GO:0005634;GO:0007018;GO:0051315;GO:…	membrane;microtubule;motor activity;cytoplasm;mitotic metaphase plate congression;protein binding;cell;condensed chromosome outer kinetochore;metaphase plate congression;regulation of mitotic metaphase/anaphase transition;condensed chromosome kinetochore;ATPase activity;cytoskeleton;microtubule cytoskeleton;chromosome;microtubule binding;kinetochore binding;mitotic chromosome movement towards spi…	.	.	.	CENPE
ENSG00000103245	0.21372	yes	down	0.000328143	yes	chr16	-	740001	741000	exon	first exon	NA	ENST00000251588	1.35678	no	up	0.439173	no	GO:0002244;GO:0010468;GO:0003954;GO:0051536;GO:0055114;GO:0001666;GO:0032364;GO:0046872;GO:0016226;GO:0051539;GO:0097361	hematopoietic progenitor cell differentiation;regulation of gene expression;NADH dehydrogenase activity;iron-sulfur cluster binding;oxidation-reduction process;response to hypoxia;oxygen homeostasis;metal ion binding;iron-sulfur cluster assembly;4 iron, 4 sulfur cluster binding;CIA complex	.	.	.	NARFL
ENSG00000153982	1.59508	yes	up	7.20206e-05	yes	chr17	+	59234001	59235000	intron	internal intron	NA	ENST00000284116	1.36761	no	up	0.443676	no	GO:0016020;GO:0005737;GO:0048471;GO:0004622;GO:0046872;GO:0008081;GO:0016787;GO:0006644;GO:0016021;GO:0070291;GO:0006629	membrane;cytoplasm;perinuclear region of cytoplasm;lysophospholipase activity;metal ion binding;phosphoric diester hydrolase activity;hydrolase activity;phospholipid metabolic process;integral component of membrane;N-acylethanolamine metabolic process;lipid metabolic process	ko00565	Ether lipid metabolism	Metabolism	GDPD1
ENSG00000122481	0.0475113	yes	down	1.41081e-05	yes	chr1	+	95233501	95234500	intron	last intron	NA	ENST00000460571	1.36945	no	up	0.448354	no	GO:0005634;GO:0005515;GO:1902073;GO:0033235;GO:0032088;GO:0005737	nucleus;protein binding;positive regulation of hypoxia-inducible factor-1alpha signaling pathway;positive regulation of protein sumoylation;negative regulation of NF-kappaB transcription factor activity;cytoplasm	.	.	.	RWDD3
ENSG00000148426	1.56468	yes	up	0.000549388	yes	chr10	+	11821501	11822500	promoter	Intermediate	ICP	ENST00000277570	1.34561	no	up	0.449166	no	GO:0005515	protein binding	.	.	.	PROSER2
ENSG00000140263	4.95181	yes	up	9.31922e-07	yes	chr15	+	45023001	45024000	intron	first intron	NA	ENST00000267814	1.34079	no	up	0.449974	no	GO:0019640;GO:0005929;GO:0016020;GO:0005615;GO:0042995;GO:0006970;GO:0055114;GO:0003939;GO:0005829;GO:0031514;GO:0008270;GO:0005739;GO:0016491;GO:0006062;GO:0006006;GO:0070062;GO:0042493;GO:0030317;GO:0042802;GO:0051287;GO:0051160;GO:0046688;GO:0051164;GO:0046686;GO:0030246;GO:0046872;GO:0031667;GO:0009725;GO:0046526;GO:0031966;GO:0046370;GO:0006060	glucuronate catabolic process to xylulose 5-phosphate;cilium;membrane;extracellular space;cell projection;response to osmotic stress;oxidation-reduction process;L-iditol 2-dehydrogenase activity;cytosol;motile cilium;zinc ion binding;mitochondrion;oxidoreductase activity;sorbitol catabolic process;glucose metabolic process;extracellular vesicular exosome;response to drug;sperm motility;identical …	ko00040;ko00051	Pentose and glucuronate interconversions;Fructose and mannose metabolism	Metabolism;Metabolism	SORD
ENSG00000148200	0.50989	yes	down	3.83793e-07	yes	chr9	-	124537001	124538000	downstream	NA	NA	ENST00000487099	0.667123	no	down	0.452603	no	GO:0003707;GO:0003677;GO:0006355;GO:0001077;GO:0007283;GO:0000122;GO:0008283;GO:0005667;GO:0043565;GO:0008270;GO:0007276;GO:0003700;GO:0005634;GO:0005654;GO:0000978;GO:0006351;GO:0004879;GO:0042803;GO:0006366;GO:0046872;GO:0045944;GO:0043401;GO:0030518;GO:0006367	steroid hormone receptor activity;DNA binding;regulation of transcription, DNA-templated;RNA polymerase II core promoter proximal region sequence-specific DNA binding transcription factor activity involved in positive regulation of transcription;spermatogenesis;negative regulation of transcription from RNA polymerase II promoter;cell proliferation;transcription factor complex;sequence-specific DN…	.	.	.	NR6A1
ENSG00000083807	2.51456	yes	up	0.000210598	yes	chr19	-	58498501	58499500	exon	first exon	NA	ENST00000595851	1.34849	no	up	0.453793	no	GO:0016020;GO:0006642;GO:0005783;GO:0005524;GO:0004467;GO:0015721;GO:0016874;GO:0006631;GO:0000166;GO:0016021;GO:0043231;GO:0046951;GO:0000038;GO:0015908;GO:0008152;GO:0003824;GO:0001676;GO:0009925;GO:0047747;GO:0015245;GO:0043234;GO:0030176;GO:0005789;GO:0008206;GO:0015911;GO:0032403;GO:0006699;GO:0031957;GO:0006629	membrane;triglyceride mobilization;endoplasmic reticulum;ATP binding;long-chain fatty acid-CoA ligase activity;bile acid and bile salt transport;ligase activity;fatty acid metabolic process;nucleotide binding;integral component of membrane;intracellular membrane-bounded organelle;ketone body biosynthetic process;very long-chain fatty acid metabolic process;fatty acid transport;metabolic process;c…	ko04931;ko00120;ko04976;ko03320	Insulin resistance;Primary bile acid biosynthesis;Bile secretion;PPAR signaling pathway	Human Diseases;Metabolism;Organismal Systems;Organismal Systems	SLC27A5
ENSG00000205213	0.560976	yes	down	0.000482143	yes	chr11	-	27474501	27475500	promoter	Distal	ICP	ENST00000379214	0.6614	no	down	0.454361	no	GO:0016020;GO:0001649;GO:0034122;GO:0061290;GO:0072282;GO:0005515;GO:0005887;GO:0004888;GO:0004871;GO:0050710;GO:0045087;GO:0045892;GO:0007165;GO:0030154;GO:0090263;GO:0090190;GO:0007275;GO:0072202;GO:0016055;GO:0007283;GO:0004930;GO:0035239;GO:0045893;GO:0030539;GO:0002376;GO:0016021;GO:0072224;GO:0032922;GO:0005886;GO:2001013;GO:0050673;GO:0007186;GO:0007623;GO:0030282;GO:0036335;GO:0048511;GO:…	membrane;osteoblast differentiation;negative regulation of toll-like receptor signaling pathway;canonical Wnt signaling pathway involved in metanephric kidney development;metanephric nephron tubule morphogenesis;protein binding;integral component of plasma membrane;transmembrane signaling receptor activity;signal transducer activity;negative regulation of cytokine secretion;innate immune response…	.	.	.	LGR4
ENSG00000120279	0.676667	yes	down	0.000808783	yes	chr6	+	152722501	152723500	downstream	NA	NA	ENST00000367245	0.669922	no	down	0.456277	no	GO:0016020;GO:0043231;GO:0005654;GO:0005634;GO:0016021	membrane;intracellular membrane-bounded organelle;nucleoplasm;nucleus;integral component of membrane	.	.	.	MYCT1
ENSG00000096696	1.36008	yes	up	6.70657e-05	yes	chr6	+	7585501	7586500	exon	last exon	NA	ENST00000379802	0.667268	no	down	0.457535	no	GO:0016323;GO:0016020;GO:0045109;GO:0071896;GO:0030054;GO:0031424;GO:0005737;GO:0018149;GO:0097110;GO:0086083;GO:0005515;GO:0005911;GO:0003223;GO:0014704;GO:0005856;GO:0070062;GO:0086073;GO:0016337;GO:0086091;GO:0005916;GO:0034332;GO:0008544;GO:0003723;GO:0043588;GO:0098911;GO:0045104;GO:0030674;GO:0030216;GO:0002934;GO:0070268;GO:0043312;GO:0005886;GO:0030057;GO:0031012;GO:0050839;GO:0005634;GO:…	basolateral plasma membrane;membrane;intermediate filament organization;protein localization to adherens junction;cell junction;keratinization;cytoplasm;peptide cross-linking;scaffold protein binding;cell adhesive protein binding involved in bundle of His cell-Purkinje myocyte communication;protein binding;cell-cell junction;ventricular compact myocardium morphogenesis;intercalated disc;cytoskele…	ko05412	Arrhythmogenic right ventricular cardiomyopathy (ARVC)	Human Diseases	DSP
ENSG00000204248	0.319588	yes	down	2.02614e-08	yes	chr6	-	33161001	33162000	downstream	NA	NA	ENST00000341947	0.661379	no	down	0.457997	no	GO:0005788;GO:0005840;GO:0001649;GO:0030674;GO:0030199;GO:0051216;GO:0060023;GO:0030020;GO:0005515;GO:0005576;GO:0060021;GO:0005581;GO:0005592;GO:0048705;GO:0005201;GO:0001894;GO:0005578;GO:0002062;GO:0046872;GO:0007605;GO:0001501;GO:0030574	endoplasmic reticulum lumen;ribosome;osteoblast differentiation;protein binding, bridging;collagen fibril organization;cartilage development;soft palate development;extracellular matrix structural constituent conferring tensile strength;protein binding;extracellular region;palate development;collagen trimer;collagen type XI trimer;skeletal system morphogenesis;extracellular matrix structural cons…	ko04974	Protein digestion and absorption	Organismal Systems	COL11A2
ENSG00000172339	0.599156	yes	down	9.49242e-05	yes	chr1	-	95064001	95065000	exon	internal exon	NA	ENST00000370205	1.34549	no	up	0.460626	no	GO:0016020;GO:0031965;GO:0005783;GO:0005634;GO:0006488;GO:0016021;GO:0005789;GO:0004577	membrane;nuclear membrane;endoplasmic reticulum;nucleus;dolichol-linked oligosaccharide biosynthetic process;integral component of membrane;endoplasmic reticulum membrane;N-acetylglucosaminyldiphosphodolichol N-acetylglucosaminyltransferase activity	ko00510	N-Glycan biosynthesis	Metabolism	ALG14
ENSG00000159899	0.678369	yes	down	1.58261e-05	yes	chr9	+	35790501	35791500	promoter	Intermediate	ICP	ENST00000342694	0.659843	no	down	0.463541	no	GO:0008217;GO:0016020;GO:0005524;GO:0008074;GO:0042562;GO:0035556;GO:0001503;GO:0016829;GO:0005515;GO:0005887;GO:0000166;GO:0004672;GO:0017046;GO:0016021;GO:0005886;GO:1900194;GO:0004383;GO:0060348;GO:0016941;GO:0042802;GO:0005622;GO:0006468;GO:0009190;GO:0044702;GO:0006182;GO:0051447;GO:0016849;GO:0005525;GO:0007168;GO:0097011	regulation of blood pressure;membrane;ATP binding;guanylate cyclase complex, soluble;hormone binding;intracellular signal transduction;ossification;lyase activity;protein binding;integral component of plasma membrane;nucleotide binding;protein kinase activity;peptide hormone binding;integral component of membrane;plasma membrane;negative regulation of oocyte maturation;guanylate cyclase activity;…	ko04921;ko00230;ko04270;ko04022	Oxytocin signaling pathway;Purine metabolism;Vascular smooth muscle contraction;cGMP-PKG signaling pathway	Organismal Systems;Metabolism;Organismal Systems;Environmental Information Processing	NPR2
ENSG00000197915	1.88837	yes	up	0.000534198	yes	chr1	-	152225001	152226000	promoter	Distal	LCP	ENST00000368801	0.673684	no	down	0.466774	no	GO:0031424;GO:0005737;GO:0035578;GO:0043312;GO:0005576;GO:0070062;GO:0005634;GO:0043163;GO:0001533;GO:0046914;GO:0048471;GO:0046872;GO:0007275;GO:0005509;GO:0061436;GO:0036457	keratinization;cytoplasm;azurophil granule lumen;neutrophil degranulation;extracellular region;extracellular vesicular exosome;nucleus;cell envelope organization;cornified envelope;transition metal ion binding;perinuclear region of cytoplasm;metal ion binding;multicellular organismal development;calcium ion binding;establishment of skin barrier;keratohyalin granule	.	.	.	HRNR
ENSG00000142798	0.6875	yes	down	0.000564691	yes	chr1	-	21881001	21882000	intron	internal intron	NA	ENST00000374695	0.672086	no	down	0.46731	no	GO:0005615;GO:0006024;GO:0005796;GO:0044267;GO:0005515;GO:0043202;GO:0005576;GO:0006027;GO:0005886;GO:0030203;GO:0005604;GO:0070062;GO:0031012;GO:0001525;GO:0005925;GO:0005578;GO:0022617;GO:0046872;GO:0001523;GO:0008022;GO:0006898;GO:0030198;GO:0005509;GO:0050750;GO:0006629	extracellular space;glycosaminoglycan biosynthetic process;Golgi lumen;cellular protein metabolic process;protein binding;lysosomal lumen;extracellular region;glycosaminoglycan catabolic process;plasma membrane;glycosaminoglycan metabolic process;basement membrane;extracellular vesicular exosome;extracellular matrix;angiogenesis;focal adhesion;proteinaceous extracellular matrix;extracellular matr…	ko05205;ko04512;ko05161	Proteoglycans in cancer;ECM-receptor interaction;Hepatitis B	Human Diseases;Environmental Information Processing;Human Diseases	HSPG2
ENSG00000175048	0.659768	yes	down	1.28599e-06	yes	chr6	+	157647001	157648000	intron	internal intron	NA	ENST00000414563	1.34303	no	up	0.468606	no	GO:0018345;GO:0016020;GO:0005783;GO:0016746;GO:0019706;GO:0016409;GO:0016021;GO:0016740	protein palmitoylation;membrane;endoplasmic reticulum;transferase activity, transferring acyl groups;protein-cysteine S-palmitoyltransferase activity;palmitoyltransferase activity;integral component of membrane;transferase activity	.	.	.	ZDHHC14
ENSG00000176715	0.453496	yes	down	4.52187e-06	yes	chr16	+	89123501	89124500	downstream	NA	NA	ENST00000393145	0.679892	no	down	0.468938	no	GO:0005759;GO:0005524;GO:0008152;GO:0090410;GO:0003824;GO:0016874;GO:0090409;GO:0000166;GO:0006631;GO:0035338;GO:0006633;GO:0005739;GO:0031957;GO:0016878;GO:0006629	mitochondrial matrix;ATP binding;metabolic process;malonate catabolic process;catalytic activity;ligase activity;malonyl-CoA synthetase activity;nucleotide binding;fatty acid metabolic process;long-chain fatty-acyl-CoA biosynthetic process;fatty acid biosynthetic process;mitochondrion;very long-chain fatty acid-CoA ligase activity;acid-thiol ligase activity;lipid metabolic process	ko00280	Valine, leucine and isoleucine degradation	Metabolism	ACSF3
ENSG00000171219	2.44699	yes	up	1.84979e-08	yes	chr11	-	64844001	64845000	promoter	Intermediate	ICP	ENST00000342711	0.676316	no	down	0.468953	no	GO:0031252;GO:0000287;GO:0016310;GO:0005524;GO:0035556;GO:0005737;GO:0005515;GO:0000166;GO:0004672;GO:0005829;GO:0005815;GO:0031532;GO:0016301;GO:0006468;GO:0046872;GO:0004674;GO:0016740	cell leading edge;magnesium ion binding;phosphorylation;ATP binding;intracellular signal transduction;cytoplasm;protein binding;nucleotide binding;protein kinase activity;cytosol;microtubule organizing center;actin cytoskeleton reorganization;kinase activity;protein phosphorylation;metal ion binding;protein serine/threonine kinase activity;transferase activity	.	.	.	CDC42BPG
ENSG00000143776	1.79795	yes	up	0.000936736	yes	chr1	-	227213001	227214000	intron	internal intron	NA	ENST00000366769	1.32026	no	up	0.470751	no	GO:0031252;GO:0000287;GO:0031032;GO:0016477;GO:0016310;GO:0005524;GO:0035556;GO:0005737;GO:0005515;GO:0005911;GO:0000166;GO:0004672;GO:0070062;GO:0031532;GO:0030036;GO:0016301;GO:0042802;GO:0005622;GO:0006468;GO:0046872;GO:0004674;GO:0042641;GO:0016740	cell leading edge;magnesium ion binding;actomyosin structure organization;cell migration;phosphorylation;ATP binding;intracellular signal transduction;cytoplasm;protein binding;cell-cell junction;nucleotide binding;protein kinase activity;extracellular vesicular exosome;actin cytoskeleton reorganization;actin cytoskeleton organization;kinase activity;identical protein binding;intracellular;protei…	.	.	.	CDC42BPA
ENSG00000167130	1.7204	yes	up	2.76528e-07	yes	chr9	+	129086501	129087500	intron	last intron	NA	ENST00000406974	1.35438	no	up	0.471039	no	GO:0016020;GO:0006486;GO:0005783;GO:0047874;GO:0016787;GO:0006489;GO:0030176;GO:0016021;GO:0006487;GO:0005789;GO:0008610	membrane;protein glycosylation;endoplasmic reticulum;dolichyldiphosphatase activity;hydrolase activity;dolichyl diphosphate biosynthetic process;integral component of endoplasmic reticulum membrane;integral component of membrane;protein N-linked glycosylation;endoplasmic reticulum membrane;lipid biosynthetic process	ko00510	N-Glycan biosynthesis	Metabolism	DOLPP1
ENSG00000139645	1.72019	yes	up	3.65677e-05	yes	chr12	-	56236501	56237500	downstream	NA	NA	ENST00000267116	0.681518	no	down	0.472115	no	GO:0005515	protein binding	.	.	.	ANKRD52
ENSG00000155846	0.609174	yes	down	0.000830589	yes	chr5	+	149854501	149855500	downstream	NA	NA	ENST00000394320	0.677165	no	down	0.473129	no	GO:0030546;GO:2000273;GO:0045672;GO:0006390;GO:0007015;GO:0045892;GO:0030520;GO:0050682;GO:0030374;GO:0042327;GO:0045944;GO:0003723;GO:0030331;GO:0034614;GO:0006355;GO:0001503;GO:0045893;GO:0051091;GO:0060346;GO:0003712;GO:0005739;GO:0051384;GO:0005634;GO:1903506;GO:0016592;GO:0001104;GO:0051591;GO:0006351;GO:0003676;GO:0045780;GO:0010694;GO:0008134	receptor activator activity;positive regulation of receptor activity;positive regulation of osteoclast differentiation;transcription from mitochondrial promoter;actin filament organization;negative regulation of transcription, DNA-templated;intracellular estrogen receptor signaling pathway;AF-2 domain binding;ligand-dependent nuclear receptor transcription coactivator activity;positive regulation…	ko04931	Insulin resistance	Human Diseases	PPARGC1B
ENSG00000186654	1.77663	yes	up	0.000377077	yes	chr22	+	44734501	44735500	intron	last intron	NA	ENST00000432916	1.33102	no	up	0.473913	no	GO:0014068;GO:0031295;GO:0038111;GO:0038203;GO:0031932;GO:0005829;GO:0001934;GO:0048015;GO:0007049	positive regulation of phosphatidylinositol 3-kinase signaling;T cell costimulation;interleukin-7-mediated signaling pathway;TORC2 signaling;TORC2 complex;cytosol;positive regulation of protein phosphorylation;phosphatidylinositol-mediated signaling;cell cycle	ko04150	mTOR signaling pathway	Environmental Information Processing	PRR5
ENSG00000275395	1.45145	yes	up	2.1792e-05	yes	chr19	-	39924501	39925500	intron	internal intron	NA	ENST00000616721	1.3127	no	up	0.474064	no	.	.	.	.	.	FCGBP
ENSG00000154620	0.0928	yes	down	5.32227e-09	yes	chrY	+	13703001	13704000	exon	first exon	NA	ENST00000284856	1.33437	no	up	0.474926	no	GO:0005856;GO:0005634;GO:0005615;GO:0008064;GO:0042989;GO:0003785;GO:0005737;GO:0003779;GO:0007015;GO:0005515;GO:0030334;GO:0005829	cytoskeleton;nucleus;extracellular space;regulation of actin polymerization or depolymerization;sequestering of actin monomers;actin monomer binding;cytoplasm;actin binding;actin filament organization;protein binding;regulation of cell migration;cytosol	ko04810	Regulation of actin cytoskeleton	Cellular Processes	TMSB4Y
ENSG00000135960	2.21951	yes	up	3.46937e-08	yes	chr2	-	108991001	108992000	promoter	Distal	LCP	ENST00000258443	1.32805	no	up	0.475367	no	GO:0046330;GO:0016020;GO:0005515;GO:0004888;GO:0016021;GO:0005886;GO:0033209;GO:0060662;GO:0030154;GO:0004872;GO:0010628;GO:0042475;GO:0006915;GO:0042346;GO:0043123;GO:0043473;GO:0008544;GO:0007275;GO:0045177;GO:0001942	positive regulation of JNK cascade;membrane;protein binding;transmembrane signaling receptor activity;integral component of membrane;plasma membrane;tumor necrosis factor-mediated signaling pathway;salivary gland cavitation;cell differentiation;receptor activity;positive regulation of gene expression;odontogenesis of dentin-containing tooth;apoptotic process;positive regulation of NF-kappaB impor…	ko04060	Cytokine-cytokine receptor interaction	Environmental Information Processing	EDAR
ENSG00000277462	0.597778	yes	down	3.82571e-05	yes	chr1	-	247078501	247079500	exon	first exon	NA	ENST00000366503	1.33797	no	up	0.479452	no	GO:0003677;GO:0046872;GO:0005634;GO:0005515;GO:0006355;GO:0005622;GO:0006351;GO:0003676	DNA binding;metal ion binding;nucleus;protein binding;regulation of transcription, DNA-templated;intracellular;transcription, DNA-templated;nucleic acid binding	.	.	.	ZNF670
ENSG00000157423	1.64891	yes	up	0.000440363	yes	chr16	-	71163001	71164000	promoter	Distal	LCP	ENST00000393567	0.659602	no	down	0.479862	no	GO:0005929;GO:0003341;GO:0042995;GO:0002064;GO:0007275;GO:0060438;GO:0021591	cilium;cilium movement;cell projection;epithelial cell development;multicellular organismal development;trachea development;ventricular system development	.	.	.	HYDIN
ENSG00000134709	2.0625	yes	up	0.000973406	yes	chr1	+	59835001	59836000	intron	internal intron	NA	ENST00000466803	0.668489	no	down	0.481657	no	GO:0045022;GO:0005874;GO:0007283;GO:0005737;GO:0005515;GO:0005829;GO:0008333;GO:0030705;GO:0015031;GO:0007040;GO:0031122;GO:0006810;GO:0005856;GO:0051959;GO:0030154;GO:0015630;GO:0042802;GO:0005813;GO:0007286;GO:0008017;GO:0003779;GO:0070695;GO:0030897;GO:0007275;GO:0007032	early endosome to late endosome transport;microtubule;spermatogenesis;cytoplasm;protein binding;cytosol;endosome to lysosome transport;cytoskeleton-dependent intracellular transport;protein transport;lysosome organization;cytoplasmic microtubule organization;transport;cytoskeleton;dynein light intermediate chain binding;cell differentiation;microtubule cytoskeleton;identical protein binding;centr…	.	.	.	HOOK1
ENSG00000035664	0.639257	yes	down	0.000140239	yes	chr15	-	63981501	63982500	downstream	NA	NA	ENST00000612884	0.667078	no	down	0.48205	no	GO:0016020;GO:0016310;GO:0005524;GO:0043276;GO:0031410;GO:0035556;GO:0005737;GO:0005515;GO:0004672;GO:0000166;GO:0016021;GO:0010506;GO:0005516;GO:1990266;GO:0043231;GO:0090023;GO:0016301;GO:0042802;GO:0006468;GO:0034423;GO:2001242;GO:0046777;GO:0006915;GO:0018107;GO:2000424;GO:0018105;GO:0004674;GO:0005794;GO:0016740;GO:0042981	membrane;phosphorylation;ATP binding;anoikis;cytoplasmic vesicle;intracellular signal transduction;cytoplasm;protein binding;protein kinase activity;nucleotide binding;integral component of membrane;regulation of autophagy;calmodulin binding;neutrophil migration;intracellular membrane-bounded organelle;positive regulation of neutrophil chemotaxis;kinase activity;identical protein binding;protein …	ko05200;ko05219;ko04140	Pathways in cancer;Bladder cancer;Autophagy - animal	Human Diseases;Human Diseases;Cellular Processes	DAPK2
ENSG00000174371	1.4186	yes	up	0.000606427	yes	chr1	+	241888501	241889500	exon	last exon	NA	ENST00000366548	1.3223	no	up	0.483066	no	GO:0006260;GO:0045145;GO:0000731;GO:0016787;GO:0005515;GO:0003682;GO:0016604;GO:0005654;GO:0000732;GO:0003824;GO:1901796;GO:0051908;GO:0008409;GO:0035312;GO:0006310;GO:0004519;GO:0045190;GO:0003677;GO:0016446;GO:0004523;GO:0002376;GO:0051321;GO:0006974;GO:0002455;GO:0005634;GO:0006281;GO:0006298;GO:0016788;GO:0004518;GO:0004527;GO:0046872;GO:0048256;GO:0090502;GO:0090305	DNA replication;single-stranded DNA 5'-3' exodeoxyribonuclease activity;DNA synthesis involved in DNA repair;hydrolase activity;protein binding;chromatin binding;nuclear body;nucleoplasm;strand displacement;catalytic activity;regulation of signal transduction by p53 class mediator;double-stranded DNA 5'-3' exodeoxyribonuclease activity;5'-3' exonuclease activity;5'-3' exodeoxyribonuclease activit…	ko03430	Mismatch repair	Genetic Information Processing	EXO1
ENSG00000149716	1.74257	yes	up	9.35857e-05	yes	chr11	-	69663501	69664500	downstream	NA	NA	ENST00000543023	1.32271	no	up	0.484101	no	GO:0035861;GO:0033314;GO:0031573;GO:0000724;GO:0044778;GO:0030896;GO:0006289	site of double-strand break;mitotic DNA replication checkpoint;intra-S DNA damage checkpoint;double-strand break repair via homologous recombination;meiotic DNA integrity checkpoint;checkpoint clamp complex;nucleotide-excision repair	.	.	.	ORAOV1
ENSG00000160972	0.598655	yes	down	0.000901704	yes	chr8	+	144494501	144495500	promoter	Distal	LCP	ENST00000526183	1.31854	no	up	0.485416	no	GO:0016020;GO:0005515;GO:0019888;GO:0050790;GO:0005886	membrane;protein binding;protein phosphatase regulator activity;regulation of catalytic activity;plasma membrane	.	.	.	PPP1R16A
ENSG00000105641	0.644103	yes	down	0.000590087	yes	chr19	+	17882001	17883000	intron	first intron	NA	ENST00000222248	1.33372	no	up	0.485767	no	GO:0016020;GO:0035725;GO:0008507;GO:0071320;GO:0015293;GO:0071371;GO:0016021;GO:0005886;GO:0098656;GO:0006814;GO:0015705;GO:0006810;GO:0070062;GO:0005634;GO:0055085;GO:0006811;GO:1903561;GO:0015111;GO:0006590;GO:0005215	membrane;sodium ion transmembrane transport;sodium:iodide symporter activity;cellular response to cAMP;symporter activity;cellular response to gonadotropin stimulus;integral component of membrane;plasma membrane;anion transmembrane transport;sodium ion transport;iodide transport;transport;extracellular vesicular exosome;nucleus;transmembrane transport;ion transport;extracellular vesicle;iodide tr…	ko04918	Thyroid hormone synthesis	Organismal Systems	SLC5A5
ENSG00000140534	0.451807	yes	down	1.08134e-05	yes	chr15	+	89573501	89574500	promoter	Intermediate	ICP	ENST00000268138	1.34236	no	up	0.486715	no	GO:0030174;GO:0005654;GO:0005634;GO:0010212;GO:0006281;GO:0006260;GO:0001731;GO:0000075;GO:0033314;GO:0005515;GO:0003682;GO:0006974;GO:0007049	regulation of DNA-dependent DNA replication initiation;nucleoplasm;nucleus;response to ionizing radiation;DNA repair;DNA replication;formation of translation preinitiation complex;cell cycle checkpoint;mitotic DNA replication checkpoint;protein binding;chromatin binding;cellular response to DNA damage stimulus;cell cycle	.	.	.	TICRR
ENSG00000109956	1.54745	yes	up	0.000355103	yes	chr11	-	134382001	134383000	exon	internal exon	NA	ENST00000524765	0.680286	no	down	0.487948	no	GO:0016020;GO:0006486;GO:0005783;GO:0000139;GO:0008499;GO:0005975;GO:0005576;GO:0016021;GO:0030204;GO:0030203;GO:0043231;GO:0046872;GO:0005794;GO:0015018;GO:0050650;GO:0005789;GO:0016740	membrane;protein glycosylation;endoplasmic reticulum;Golgi membrane;UDP-galactose:beta-N-acetylglucosamine beta-1,3-galactosyltransferase activity;carbohydrate metabolic process;extracellular region;integral component of membrane;chondroitin sulfate metabolic process;glycosaminoglycan metabolic process;intracellular membrane-bounded organelle;metal ion binding;Golgi apparatus;galactosylgalactosyl…	ko00515	Mannose type O-glycan biosynthesis	Metabolism	B3GAT1
ENSG00000185920	1.4692	yes	up	0.000142834	yes	chr9	-	95496001	95497000	promoter	Distal	LCP	ENST00000331920	0.688508	no	down	0.48798	no	GO:0010157;GO:0001841;GO:0016020;GO:0043616;GO:0061053;GO:0043433;GO:0007420;GO:0042593;GO:0008158;GO:0016485;GO:0045668;GO:0008201;GO:0007224;GO:0008285;GO:0030332;GO:0009953;GO:0007165;GO:0044294;GO:0060037;GO:0014069;GO:0005119;GO:0008544;GO:0005113;GO:0060644;GO:0005929;GO:0072203;GO:0051782;GO:0014070;GO:0035137;GO:0030666;GO:0030496;GO:0045893;GO:0003007;GO:0045879;GO:0097108;GO:0000122;GO:…	response to chlorate;neural tube formation;membrane;keratinocyte proliferation;somite development;negative regulation of sequence-specific DNA binding transcription factor activity;brain development;glucose homeostasis;hedgehog receptor activity;protein processing;negative regulation of osteoblast differentiation;heparin binding;smoothened signaling pathway;negative regulation of cell proliferati…	ko05217;ko05200;ko04360;ko04024;ko05205;ko04340	Basal cell carcinoma;Pathways in cancer;Axon guidance;cAMP signaling pathway;Proteoglycans in cancer;Hedgehog signaling pathway	Human Diseases;Human Diseases;Organismal Systems;Environmental Information Processing;Human Diseases;Environmental Information Processing	PTCH1
ENSG00000154328	0.60916	yes	down	0.000885666	yes	chr8	+	11782001	11783000	exon	first exon	NA	ENST00000284503	1.31652	no	up	0.488729	no	GO:0003677;GO:0006284;GO:0005737;GO:0006289;GO:0016829;GO:0005515;GO:0005730;GO:0016787;GO:0045008;GO:0008270;GO:0006974;GO:0005876;GO:0005654;GO:0005634;GO:0003906;GO:0016799;GO:0006281;GO:0008152;GO:0015630;GO:0003824;GO:0008017;GO:0003676;GO:0016798;GO:0046872;GO:0003684;GO:0019104	DNA binding;base-excision repair;cytoplasm;nucleotide-excision repair;lyase activity;protein binding;nucleolus;hydrolase activity;depyrimidination;zinc ion binding;cellular response to DNA damage stimulus;spindle microtubule;nucleoplasm;nucleus;DNA-(apurinic or apyrimidinic site) lyase activity;hydrolase activity, hydrolyzing N-glycosyl compounds;DNA repair;metabolic process;microtubule cytoskele…	ko03410	Base excision repair	Genetic Information Processing	NEIL2
ENSG00000187240	1.836	yes	up	0.000982525	yes	chr11	+	103467001	103468000	promoter	Distal	LCP	ENST00000375735	0.690087	no	down	0.490436	no	GO:0016020;GO:0005874;GO:0003774;GO:0008569;GO:0005737;GO:0060271;GO:0016485;GO:0045503;GO:0016887;GO:0051959;GO:0070062;GO:0005856;GO:0009953;GO:0008105;GO:0007368;GO:0007507;GO:0030900;GO:0007275;GO:0045880;GO:0021522;GO:0003777;GO:0045177;GO:0005930;GO:0005929;GO:0042995;GO:0005524;GO:0035721;GO:0097542;GO:0030286;GO:0000166;GO:0005868;GO:0031514;GO:0035735;GO:0005886;GO:0060976;GO:0030182;GO:…	membrane;microtubule;motor activity;minus-end-directed microtubule motor activity;cytoplasm;cilium morphogenesis;protein processing;dynein light chain binding;ATPase activity;dynein light intermediate chain binding;extracellular vesicular exosome;cytoskeleton;dorsal/ventral pattern formation;asymmetric protein localization;determination of left/right symmetry;heart development;forebrain developme…	ko05132;ko04145;ko04962	Salmonella infection;Phagosome;Vasopressin-regulated water reabsorption	Human Diseases;Cellular Processes;Organismal Systems	DYNC2H1
ENSG00000152784	0.497821	yes	down	1.00202e-05	yes	chr4	+	80197001	80198000	intron	first intron	NA	ENST00000515013	0.666814	no	down	0.492481	no	GO:0007399;GO:0003677;GO:0005634;GO:0006355;GO:0008168;GO:0006351;GO:0003676;GO:0046872;GO:0005515;GO:0014003;GO:0016740;GO:0032259	nervous system development;DNA binding;nucleus;regulation of transcription, DNA-templated;methyltransferase activity;transcription, DNA-templated;nucleic acid binding;metal ion binding;protein binding;oligodendrocyte development;transferase activity;methylation	.	.	.	PRDM8
ENSG00000126217	0.12766	yes	down	1.92449e-09	yes	chr13	+	113001001	113002000	intron	first intron	NA	ENST00000375608	0.684905	no	down	0.493215	no	GO:0016020;GO:0005615;GO:0005622;GO:0005085;GO:0043547;GO:0035556;GO:0005737;GO:0035091;GO:0012505;GO:0008289;GO:0043065;GO:0005829;GO:0035023;GO:0051056;GO:0005886;GO:0005089	membrane;extracellular space;intracellular;guanyl-nucleotide exchange factor activity;positive regulation of GTPase activity;intracellular signal transduction;cytoplasm;phosphatidylinositol binding;endomembrane system;lipid binding;positive regulation of apoptotic process;cytosol;regulation of Rho protein signal transduction;regulation of small GTPase mediated signal transduction;plasma membrane;…	.	.	.	MCF2L
ENSG00000140463	2.2562	yes	up	1.30573e-05	yes	chr15	+	72725001	72726000	downstream	NA	NA	ENST00000268057	1.294	no	up	0.494231	no	GO:0016020;GO:0034452;GO:0007098;GO:0035869;GO:0021766;GO:0007601;GO:0005737;GO:0060271;GO:0048487;GO:0021987;GO:1903546;GO:0019216;GO:0060613;GO:0015031;GO:0051457;GO:0001917;GO:0003085;GO:0007286;GO:0045494;GO:1902855;GO:0001764;GO:0033365;GO:0008104;GO:0034260;GO:0005929;GO:0042995;GO:0001103;GO:0038108;GO:0036064;GO:0050893;GO:0033210;GO:0005886;GO:0006810;GO:0000226;GO:0007608;GO:0048854;GO:…	membrane;dynactin binding;centrosome cycle;ciliary transition zone;hippocampus development;visual perception;cytoplasm;cilium morphogenesis;beta-tubulin binding;cerebral cortex development;protein localization to photoreceptor outer segment;regulation of lipid metabolic process;fat pad development;protein transport;maintenance of protein location in nucleus;photoreceptor inner segment;negative re…	.	.	.	BBS4
ENSG00000132970	0.729779	yes	down	9.04451e-06	yes	chr13	+	26685001	26686000	exon	last exon	NA	ENST00000361042	0.687066	no	down	0.494637	no	GO:0030032;GO:0070062;GO:0005856;GO:0030036;GO:0030027;GO:0008360;GO:0005737;GO:0003779;GO:0014003;GO:0007010;GO:0031643;GO:0030041;GO:0006461	lamellipodium assembly;extracellular vesicular exosome;cytoskeleton;actin cytoskeleton organization;lamellipodium;regulation of cell shape;cytoplasm;actin binding;oligodendrocyte development;cytoskeleton organization;positive regulation of myelination;actin filament polymerization;protein complex assembly	ko04666;ko04520;ko05231	Fc gamma R-mediated phagocytosis;Adherens junction;Choline metabolism in cancer	Organismal Systems;Cellular Processes;Human Diseases	WASF3
ENSG00000109944	0.55625	yes	down	3.12354e-05	yes	chr11	+	122961001	122962000	downstream	NA	NA	ENST00000227349	1.30955	no	up	0.495286	no	GO:0032053;GO:0035082;GO:0033326;GO:0007420	ciliary basal body organization;axoneme assembly;cerebrospinal fluid secretion;brain development	.	.	.	C11orf63
ENSG00000203872	0.48926	yes	down	3.5226e-05	yes	chr6	+	87366001	87367000	downstream	NA	NA	ENST00000388923	0.683958	no	down	0.495724	no	.	.	.	.	.	C6orf163
ENSG00000138796	2.10545	yes	up	0.000160087	yes	chr4	+	107990001	107991000	intron	first intron	NA	ENST00000309522	1.3074	no	up	0.49606	no	GO:0005759;GO:0005737;GO:0055114;GO:0006635;GO:0070403;GO:0006631;GO:0005739;GO:0016491;GO:0005654;GO:0042493;GO:0014823;GO:0032868;GO:0046676;GO:0005743;GO:0009725;GO:0003857;GO:0006629	mitochondrial matrix;cytoplasm;oxidation-reduction process;fatty acid beta-oxidation;NAD+ binding;fatty acid metabolic process;mitochondrion;oxidoreductase activity;nucleoplasm;response to drug;response to activity;response to insulin;negative regulation of insulin secretion;mitochondrial inner membrane;response to hormone;3-hydroxyacyl-CoA dehydrogenase activity;lipid metabolic process	ko00071;ko00062;ko00380;ko00310;ko00280;ko00650	Fatty acid degradation;Fatty acid elongation;Tryptophan metabolism;Lysine degradation;Valine, leucine and isoleucine degradation;Butanoate metabolism	Metabolism;Metabolism;Metabolism;Metabolism;Metabolism;Metabolism	HADH
ENSG00000076356	0.435535	yes	down	3.02984e-06	yes	chr1	-	208039001	208040000	exon	first exon	NA	ENST00000367033	1.29852	no	up	0.49705	no	GO:0002116;GO:0016020;GO:0021785;GO:0007166;GO:0017154;GO:0051642;GO:0030334;GO:0005515;GO:0005887;GO:0048841;GO:0021915;GO:0001756;GO:0016021;GO:0005886;GO:0007165;GO:0060037;GO:0060174;GO:0071526;GO:0021935	semaphorin receptor complex;membrane;branchiomotor neuron axon guidance;cell surface receptor signaling pathway;semaphorin receptor activity;centrosome localization;regulation of cell migration;protein binding;integral component of plasma membrane;regulation of axon extension involved in axon guidance;neural tube development;somitogenesis;integral component of membrane;plasma membrane;signal tran…	ko04360	Axon guidance	Organismal Systems	PLXNA2
ENSG00000243244	1.56757	yes	up	0.000569297	yes	chr2	+	48595501	48596500	exon	last exon	NA	ENST00000406226	0.680062	no	down	0.498541	no	GO:0016020;GO:0030100;GO:0006897;GO:0005737	membrane;regulation of endocytosis;endocytosis;cytoplasm	.	.	.	STON1
ENSG00000166166	1.67964	yes	up	0.000515501	yes	chr14	+	103529501	103530500	intron	internal intron	NA	ENST00000389749	0.694109	no	down	0.500788	no	GO:0005654;GO:0005634;GO:0008168;GO:0031515;GO:0030488;GO:0008033;GO:0006400;GO:0016740;GO:0032259;GO:0016429	nucleoplasm;nucleus;methyltransferase activity;tRNA (m1A) methyltransferase complex;tRNA methylation;tRNA processing;tRNA modification;transferase activity;methylation;tRNA (adenine-N1-)-methyltransferase activity	.	.	.	TRMT61A
ENSG00000019485	0.45525	yes	down	2.71114e-05	yes	chr11	+	45233001	45234000	exon	last exon	NA	ENST00000534751	1.31692	no	up	0.502538	no	GO:0005634;GO:0006355;GO:0008168;GO:0006351;GO:0016740;GO:0032259;GO:0005737	nucleus;regulation of transcription, DNA-templated;methyltransferase activity;transcription, DNA-templated;transferase activity;methylation;cytoplasm	.	.	.	PRDM11
ENSG00000197362	0.706166	yes	down	0.00024681	yes	chr7	-	149080501	149081500	intron	first intron	NA	ENST00000316286	0.695075	no	down	0.50256	no	GO:0003677;GO:0046872;GO:0005634;GO:0006355;GO:0005622;GO:0006351;GO:0003676	DNA binding;metal ion binding;nucleus;regulation of transcription, DNA-templated;intracellular;transcription, DNA-templated;nucleic acid binding	.	.	.	ZNF786
ENSG00000180938	0.329177	yes	down	2.56191e-09	yes	chr8	+	124978501	124979500	downstream	NA	NA	ENST00000319286	1.32515	no	up	0.503063	no	GO:0003677;GO:0046872;GO:0005634;GO:0005515;GO:0006355;GO:0006351;GO:0003700;GO:0003676	DNA binding;metal ion binding;nucleus;protein binding;regulation of transcription, DNA-templated;transcription, DNA-templated;sequence-specific DNA binding transcription factor activity;nucleic acid binding	.	.	.	ZNF572
ENSG00000117411	0.40616	yes	down	2.36878e-08	yes	chr1	+	43985501	43986500	downstream	NA	NA	ENST00000356836	1.31496	no	up	0.503676	no	GO:0008542;GO:0016020;GO:0006486;GO:0032580;GO:0007420;GO:0008378;GO:0000139;GO:0016021;GO:0005975;GO:0004461;GO:0003831;GO:0043231;GO:0021680;GO:0005654;GO:0003945;GO:0007626;GO:0007613;GO:0046872;GO:0018146;GO:0016757;GO:0005794;GO:0016740	visual learning;membrane;protein glycosylation;Golgi cisterna membrane;brain development;galactosyltransferase activity;Golgi membrane;integral component of membrane;carbohydrate metabolic process;lactose synthase activity;beta-N-acetylglucosaminylglycopeptide beta-1,4-galactosyltransferase activity;intracellular membrane-bounded organelle;cerebellar Purkinje cell layer development;nucleoplasm;N-…	ko00514;ko00052;ko00601;ko00515;ko00533;ko00510	Other types of O-glycan biosynthesis;Galactose metabolism;Glycosphingolipid biosynthesis - lacto and neolacto series;Mannose type O-glycan biosynthesis;Glycosaminoglycan biosynthesis - keratan sulfate;N-Glycan biosynthesis	Metabolism;Metabolism;Metabolism;Metabolism;Metabolism;Metabolism	B4GALT2
ENSG00000102098	0.688509	yes	down	0.000588584	yes	chrX	-	18355501	18356500	promoter	Distal	HCP	ENST00000251900	0.678335	no	down	0.504798	no	GO:0009653;GO:0003677;GO:0005634;GO:0031519;GO:0006355;GO:0006351;GO:0003700	anatomical structure morphogenesis;DNA binding;nucleus;PcG protein complex;regulation of transcription, DNA-templated;transcription, DNA-templated;sequence-specific DNA binding transcription factor activity	.	.	.	SCML2
ENSG00000146263	1.9782	yes	up	0.000109342	yes	chr6	-	97266501	97267500	downstream	NA	NA	ENST00000511335	1.29802	no	up	0.504918	no	GO:0005654;GO:0005634;GO:0006281;GO:0035101;GO:0005515;GO:0042555;GO:0005829;GO:0031297;GO:0000724;GO:0006974;GO:0043596	nucleoplasm;nucleus;DNA repair;FACT complex;protein binding;MCM complex;cytosol;replication fork processing;double-strand break repair via homologous recombination;cellular response to DNA damage stimulus;nuclear replication fork	.	.	.	MMS22L
ENSG00000171451	0.541494	yes	down	0.000133244	yes	chr18	-	67505501	67506500	downstream	NA	NA	ENST00000310045	1.2871	no	up	0.505063	no	GO:0016020;GO:0008146;GO:0016853;GO:0047757;GO:0030208;GO:0000139;GO:0030205;GO:0016021;GO:0030204	membrane;sulfotransferase activity;isomerase activity;chondroitin-glucuronate 5-epimerase activity;dermatan sulfate biosynthetic process;Golgi membrane;dermatan sulfate metabolic process;integral component of membrane;chondroitin sulfate metabolic process	.	.	.	DSEL
ENSG00000003393	2.09005	yes	up	0.000100113	yes	chr2	-	201758001	201759000	downstream	NA	NA	ENST00000264276	1.28204	no	up	0.506207	no	GO:0016020;GO:0007528;GO:0030425;GO:0035022;GO:0005085;GO:0005737;GO:0031982;GO:0043025;GO:0030426;GO:0005515;GO:0071902;GO:0043197;GO:0017137;GO:0005769;GO:0030676;GO:0017112;GO:0014069;GO:0030027;GO:0043005;GO:0007409;GO:0001662;GO:0006979;GO:0035249;GO:0008104;GO:0001881;GO:0043539;GO:0043547;GO:0016050;GO:0048812;GO:0005829;GO:0045860;GO:0043231;GO:0030424;GO:0016197;GO:0005813;GO:0001701;GO:…	membrane;neuromuscular junction development;dendrite;positive regulation of Rac protein signal transduction;guanyl-nucleotide exchange factor activity;cytoplasm;vesicle;neuronal cell body;growth cone;protein binding;positive regulation of protein serine/threonine kinase activity;dendritic spine;Rab GTPase binding;early endosome;Rac guanyl-nucleotide exchange factor activity;Rab guanyl-nucleotide …	ko05014	Amyotrophic lateral sclerosis (ALS)	Human Diseases	ALS2
ENSG00000118965	0.696217	yes	down	0.000664872	yes	chr2	-	19969501	19970500	intron	internal intron	NA	ENST00000281405	0.697889	no	down	0.506226	no	GO:0005929;GO:0042995;GO:0097421;GO:0071356;GO:0032496;GO:0010629;GO:0061512;GO:0005737;GO:0009636;GO:0035721;GO:0036064;GO:0043065;GO:0097542;GO:0060271;GO:0035735;GO:0043280;GO:0005856;GO:0005815;GO:0005813;GO:0045019;GO:0030030;GO:0035091;GO:0071333;GO:1901555;GO:0090200;GO:0005930;GO:0030991	cilium;cell projection;liver regeneration;cellular response to tumor necrosis factor;response to lipopolysaccharide;negative regulation of gene expression;protein localization to cilium;cytoplasm;response to toxic substance;intraciliary retrograde transport;ciliary basal body;positive regulation of apoptotic process;ciliary tip;cilium morphogenesis;intraciliary transport involved in cilium morpho…	.	.	.	WDR35
ENSG00000091262	0.574122	yes	down	0.000297271	yes	chr16	-	16171501	16172500	downstream	NA	NA	ENST00000205557	0.695261	no	down	0.506689	no	GO:0016323;GO:0016020;GO:0005783;GO:0016324;GO:0005524;GO:0007601;GO:0043225;GO:0000166;GO:0050896;GO:0016021;GO:0016328;GO:0005886;GO:0016887;GO:0006810;GO:0055085;GO:0005634;GO:0042493;GO:0042626;GO:0005789;GO:0005215	basolateral plasma membrane;membrane;endoplasmic reticulum;apical plasma membrane;ATP binding;visual perception;anion transmembrane-transporting ATPase activity;nucleotide binding;response to stimulus;integral component of membrane;lateral plasma membrane;plasma membrane;ATPase activity;transport;transmembrane transport;nucleus;response to drug;ATPase activity, coupled to transmembrane movement o…	ko02010	ABC transporters	Environmental Information Processing	ABCC6
ENSG00000112902	1.57042	yes	up	0.00018918	yes	chr5	-	9066501	9067500	intron	internal intron	NA	ENST00000382496	0.682869	no	down	0.507859	no	GO:0016020;GO:0005615;GO:0007162;GO:0030215;GO:0035373;GO:0060326;GO:0048842;GO:0045766;GO:1990256;GO:0070062;GO:0030154;GO:0048843;GO:0035413;GO:2000352;GO:0007155;GO:0007275;GO:0002043;GO:0050918;GO:0007399;GO:2001028;GO:0051897;GO:0030836;GO:0050919;GO:0043395;GO:0016021;GO:0001938;GO:0005886;GO:0007413;GO:0045545;GO:0007267;GO:0021536;GO:0038191	membrane;extracellular space;negative regulation of cell adhesion;semaphorin receptor binding;chondroitin sulfate proteoglycan binding;cell chemotaxis;positive regulation of axon extension involved in axon guidance;positive regulation of angiogenesis;signal clustering;extracellular vesicular exosome;cell differentiation;negative regulation of axon extension involved in axon guidance;positive regu…	ko04360	Axon guidance	Organismal Systems	SEMA5A
ENSG00000160949	3.27354	yes	up	2.72555e-05	yes	chr8	-	144428501	144429500	intron	last intron	NA	ENST00000409379	1.29085	no	up	0.50988	no	GO:0042393;GO:0042994;GO:0003714;GO:0005737;GO:0005515;GO:0042555;GO:0016604;GO:0043596;GO:0006974;GO:0005634;GO:0005654;GO:0006281;GO:0035101;GO:0031297;GO:0000724;GO:0005662;GO:1903507	histone binding;cytoplasmic sequestering of transcription factor;transcription corepressor activity;cytoplasm;protein binding;MCM complex;nuclear body;nuclear replication fork;cellular response to DNA damage stimulus;nucleus;nucleoplasm;DNA repair;FACT complex;replication fork processing;double-strand break repair via homologous recombination;DNA replication factor A complex;negative regulation o…	.	.	.	TONSL
ENSG00000099954	1.41896	yes	up	4.87808e-06	yes	chr22	+	17504001	17505000	exon	internal exon	NA	ENST00000612582	0.69018	no	down	0.509979	no	GO:0016192;GO:0001842;GO:0043044;GO:0021915;GO:0007338;GO:0006309;GO:0031010;GO:0090537;GO:0005634;GO:0000910;GO:0060122;GO:0097194;GO:0016569;GO:0005719;GO:0007010;GO:0090102;GO:0001843	vesicle-mediated transport;neural fold formation;ATP-dependent chromatin remodeling;neural tube development;single fertilization;apoptotic DNA fragmentation;ISWI-type complex;CERF complex;nucleus;cytokinesis;inner ear receptor stereocilium organization;execution phase of apoptosis;covalent chromatin modification;nuclear euchromatin;cytoskeleton organization;cochlea development;neural tube closure	.	.	.	CECR2
ENSG00000102384	1.56238	yes	up	8.13719e-05	yes	chrX	+	101102001	101103000	intron	internal intron	NA	ENST00000372927	1.29833	no	up	0.511683	no	GO:0005654;GO:0005634;GO:0005694;GO:0000775;GO:0034508;GO:0007548;GO:0005515;GO:0007062;GO:0005829;GO:0016604;GO:0034080;GO:0000776	nucleoplasm;nucleus;chromosome;chromosome, centromeric region;centromere complex assembly;sex differentiation;protein binding;sister chromatid cohesion;cytosol;nuclear body;CENP-A containing nucleosome assembly;kinetochore	.	.	.	CENPI
ENSG00000095637	0.505938	yes	down	0.000207889	yes	chr10	-	95560001	95561000	promoter	Proximal	ICP	ENST00000371247	0.69133	no	down	0.513772	no	GO:0016020;GO:0008286;GO:0030054;GO:0005737;GO:0046326;GO:0007015;GO:0005913;GO:0005515;GO:0005158;GO:0005856;GO:0090004;GO:0005925;GO:0008092;GO:0006936;GO:0005912;GO:0007160;GO:0015758;GO:0001725;GO:0045725;GO:0045121;GO:0005924;GO:0046889;GO:0005829;GO:0005886;GO:0048041;GO:0006810;GO:0005070;GO:0005634;GO:0005813;GO:0005915;GO:0016363;GO:0003779;GO:0032869;GO:0005899;GO:0009967;GO:0043149	membrane;insulin receptor signaling pathway;cell junction;cytoplasm;positive regulation of glucose import;actin filament organization;cell-cell adherens junction;protein binding;insulin receptor binding;cytoskeleton;positive regulation of establishment of protein localization to plasma membrane;focal adhesion;cytoskeletal protein binding;muscle contraction;adherens junction;cell-matrix adhesion;g…	ko04910;ko04520;ko03320	Insulin signaling pathway;Adherens junction;PPAR signaling pathway	Organismal Systems;Cellular Processes;Organismal Systems	SORBS1
ENSG00000227051	1.84583	yes	up	0.000568713	yes	chr14	+	96094501	96095500	downstream	NA	NA	ENST00000555004	1.31149	no	up	0.515297	no	GO:0016020;GO:0016021	membrane;integral component of membrane	.	.	.	C14orf132
ENSG00000101298	2.15064	yes	up	0.000130527	yes	chr20	+	1294001	1295000	intron	internal intron	NA	ENST00000614659	1.29336	no	up	0.515791	no	GO:0016020;GO:0005881;GO:0030054;GO:0007420;GO:0005737;GO:0043025;GO:0007269;GO:0042734;GO:0016021;GO:0005739;GO:0005886;GO:0045202;GO:0017075;GO:0030182;GO:0043005;GO:0016081;GO:0031966	membrane;cytoplasmic microtubule;cell junction;brain development;cytoplasm;neuronal cell body;neurotransmitter secretion;presynaptic membrane;integral component of membrane;mitochondrion;plasma membrane;synapse;syntaxin-1 binding;neuron differentiation;neuron projection;synaptic vesicle docking;mitochondrial membrane	.	.	.	SNPH
ENSG00000141098	0.505639	yes	down	0.000163333	yes	chr16	-	67687501	67688500	promoter	Distal	LCP	ENST00000602279	1.30458	no	up	0.516325	no	GO:0030198;GO:0005576;GO:0055114;GO:0005578;GO:0016491	extracellular matrix organization;extracellular region;oxidation-reduction process;proteinaceous extracellular matrix;oxidoreductase activity	.	.	.	GFOD2
ENSG00000163684	0.540458	yes	down	8.40993e-06	yes	chr3	+	58307001	58308000	promoter	Distal	LCP	ENST00000445193	1.28454	no	up	0.516692	no	GO:0003723;GO:0005654;GO:0005634;GO:0030681;GO:0090501;GO:0001682;GO:0004526;GO:0006364;GO:0008033;GO:0016787;GO:0090502;GO:0004540	RNA binding;nucleoplasm;nucleus;multimeric ribonuclease P complex;RNA phosphodiester bond hydrolysis;tRNA 5'-leader removal;ribonuclease P activity;rRNA processing;tRNA processing;hydrolase activity;RNA phosphodiester bond hydrolysis, endonucleolytic;ribonuclease activity	ko03013	RNA transport	Genetic Information Processing	RPP14
ENSG00000118420	2.27439	yes	up	0.000472891	yes	chr6	-	83049001	83050000	intron	internal intron	NA	ENST00000369746	0.695135	no	down	0.519719	no	GO:0061630;GO:0044390;GO:0006513;GO:0016567;GO:0005737;GO:0000151;GO:0051865;GO:0016740;GO:0030332;GO:0000209	ubiquitin protein ligase activity;small protein conjugating enzyme binding;protein monoubiquitination;protein ubiquitination;cytoplasm;ubiquitin ligase complex;protein autoubiquitination;transferase activity;cyclin binding;protein polyubiquitination	.	.	.	UBE3D
ENSG00000071909	1.73521	yes	up	8.91563e-05	yes	chr2	+	170656501	170657500	downstream	NA	NA	ENST00000408978	1.28324	no	up	0.520311	no	GO:0016310;GO:0005524;GO:0003774;GO:0007601;GO:0090103;GO:0005737;GO:0000166;GO:0004672;GO:0050896;GO:0005856;GO:0016301;GO:0032426;GO:0006468;GO:0003779;GO:0004674;GO:0016459;GO:0007605;GO:0016740	phosphorylation;ATP binding;motor activity;visual perception;cochlea morphogenesis;cytoplasm;nucleotide binding;protein kinase activity;response to stimulus;cytoskeleton;kinase activity;stereocilium bundle tip;protein phosphorylation;actin binding;protein serine/threonine kinase activity;myosin complex;sensory perception of sound;transferase activity	.	.	.	MYO3B
ENSG00000116133	0.451039	yes	down	1.42289e-05	yes	chr1	-	54849501	54850500	downstream	NA	NA	ENST00000371269	1.27051	no	up	0.520751	no	GO:0043154;GO:0016020;GO:0042987;GO:0005783;GO:0016628;GO:0050660;GO:0005737;GO:0016125;GO:0008285;GO:0005856;GO:0016614;GO:0016126;GO:0043066;GO:0006695;GO:0003824;GO:0031639;GO:0006915;GO:0006979;GO:0033490;GO:0042605;GO:0008104;GO:0005789;GO:1901214;GO:0006629;GO:0008203;GO:0043588;GO:0009888;GO:0055114;GO:0007050;GO:0000139;GO:0008202;GO:0030539;GO:0005829;GO:0016021;GO:0016491;GO:0006694;GO:…	negative regulation of cysteine-type endopeptidase activity involved in apoptotic process;membrane;amyloid precursor protein catabolic process;endoplasmic reticulum;oxidoreductase activity, acting on the CH-CH group of donors, NAD or NADP as acceptor;flavin adenine dinucleotide binding;cytoplasm;sterol metabolic process;negative regulation of cell proliferation;cytoskeleton;oxidoreductase activit…	ko00100	Steroid biosynthesis	Metabolism	DHCR24
ENSG00000221926	0.416667	yes	down	0.000195258	yes	chr17	-	15683501	15684500	exon	first exon	NA	ENST00000416464	1.29558	no	up	0.521908	no	GO:0048386;GO:0003677;GO:0006355;GO:0019966;GO:0005737;GO:0045893;GO:0046683;GO:0032089;GO:0043967;GO:0005515;GO:0005829;GO:0060416;GO:0008270;GO:0005886;GO:0016605;GO:0050718;GO:0005622;GO:0045618;GO:0032526;GO:0003676;GO:0046872;GO:0043966	positive regulation of retinoic acid receptor signaling pathway;DNA binding;regulation of transcription, DNA-templated;interleukin-1 binding;cytoplasm;positive regulation of transcription, DNA-templated;response to organophosphorus;NACHT domain binding;histone H4 acetylation;protein binding;cytosol;response to growth hormone;zinc ion binding;plasma membrane;PML body;positive regulation of interle…	.	.	.	TRIM16
ENSG00000069020	1.38045	yes	up	0.000121938	yes	chr5	+	67162501	67163500	exon	last exon	NA	ENST00000261569	1.26723	no	up	0.522536	no	GO:0000287;GO:0016310;GO:0005524;GO:0016301;GO:0005622;GO:0006468;GO:0035556;GO:0005737;GO:0046872;GO:0018105;GO:0004674;GO:0000166;GO:0004672;GO:0016740	magnesium ion binding;phosphorylation;ATP binding;kinase activity;intracellular;protein phosphorylation;intracellular signal transduction;cytoplasm;metal ion binding;peptidyl-serine phosphorylation;protein serine/threonine kinase activity;nucleotide binding;protein kinase activity;transferase activity	.	.	.	MAST4
ENSG00000135537	0.5	yes	down	6.3001e-05	yes	chr6	+	108475501	108476500	promoter	Distal	LCP	ENST00000368977	0.70418	no	down	0.525328	no	GO:0016020;GO:0005524;GO:0006123;GO:0035694;GO:0007005;GO:0016787;GO:0005515;GO:0000166;GO:0005739;GO:0031966	membrane;ATP binding;mitochondrial electron transport, cytochrome c to oxygen;mitochondrial protein catabolic process;mitochondrion organization;hydrolase activity;protein binding;nucleotide binding;mitochondrion;mitochondrial membrane	.	.	.	AFG1L
ENSG00000186231	1.43416	yes	up	0.000552144	yes	chr6	+	97084501	97085500	intron	internal intron	NA	ENST00000369261	0.698511	no	down	0.526986	no	GO:0009566;GO:0016567;GO:0007286;GO:0005737;GO:0008584;GO:0004842;GO:0005515;GO:0031463	fertilization;protein ubiquitination;spermatid development;cytoplasm;male gonad development;ubiquitin-protein transferase activity;protein binding;Cul3-RING ubiquitin ligase complex	.	.	.	KLHL32
ENSG00000147144	2.18452	yes	up	1.61301e-06	yes	chrX	+	49063501	49064500	intron	internal intron	NA	ENST00000597275	0.696165	no	down	0.527174	no	GO:0005768;GO:0030426;GO:0042995;GO:0005515;GO:0007275;GO:0005737	endosome;growth cone;cell projection;protein binding;multicellular organismal development;cytoplasm	.	.	.	CCDC120
ENSG00000187609	0.576988	yes	down	0.0010116	yes	chr9	-	137423501	137424500	promoter	Distal	ICP	ENST00000465160	1.28327	no	up	0.527622	no	GO:0005634;GO:0006139;GO:0005737;GO:0004518;GO:0003676;GO:0046872;GO:0004527;GO:0008408;GO:0016787;GO:0090305	nucleus;nucleobase-containing compound metabolic process;cytoplasm;nuclease activity;nucleic acid binding;metal ion binding;exonuclease activity;3'-5' exonuclease activity;hydrolase activity;nucleic acid phosphodiester bond hydrolysis	.	.	.	EXD3
ENSG00000151789	1.51503	yes	up	0.000799534	yes	chr3	-	22373001	22374000	promoter	Intermediate	LCP	ENST00000281523	1.26478	no	up	0.52975	no	GO:0072332;GO:0003723;GO:0046872;GO:0005634;GO:0002039;GO:0008270;GO:0003676	intrinsic apoptotic signaling pathway by p53 class mediator;RNA binding;metal ion binding;nucleus;p53 binding;zinc ion binding;nucleic acid binding	.	.	.	ZNF385D
ENSG00000122707	0.643519	yes	down	0.000452445	yes	chr9	+	36120001	36121000	intron	internal intron	NA	ENST00000377966	0.708901	no	down	0.529801	no	GO:0016020;GO:0006501;GO:0031225;GO:0007566;GO:0005515;GO:0005576;GO:0004866;GO:0005886;GO:0010466;GO:0004867;GO:0030336;GO:0030414;GO:0001955;GO:0035115;GO:0008191;GO:0030198	membrane;C-terminal protein lipidation;anchored component of membrane;embryo implantation;protein binding;extracellular region;endopeptidase inhibitor activity;plasma membrane;negative regulation of peptidase activity;serine-type endopeptidase inhibitor activity;negative regulation of cell migration;peptidase inhibitor activity;blood vessel maturation;embryonic forelimb morphogenesis;metalloendop…	ko05206	MicroRNAs in cancer	Human Diseases	RECK
ENSG00000135119	1.50672	yes	up	1.92663e-05	yes	chr12	+	116754001	116755000	intron	internal intron	NA	ENST00000257575	1.27376	no	up	0.532436	no	GO:0016020;GO:0046872;GO:0016021	membrane;metal ion binding;integral component of membrane	.	.	.	RNFT2
ENSG00000169184	2.70513	yes	up	1.8618e-05	yes	chr22	-	27749001	27750000	downstream	NA	NA	ENST00000302326	0.705289	no	down	0.534013	no	GO:0007275;GO:0006355;GO:0001957;GO:0006351	multicellular organismal development;regulation of transcription, DNA-templated;intramembranous ossification;transcription, DNA-templated	.	.	.	MN1
ENSG00000104381	1.39942	yes	up	0.000211612	yes	chr8	+	74361501	74362500	intron	internal intron	NA	ENST00000522568	1.27392	no	up	0.535487	no	GO:0004364;GO:0016020;GO:0005634;GO:0031307;GO:0005741;GO:0032526;GO:0005737;GO:0008053;GO:0006626;GO:0006749;GO:0005829;GO:0016021;GO:0071305;GO:0005739;GO:0000266	glutathione transferase activity;membrane;nucleus;integral component of mitochondrial outer membrane;mitochondrial outer membrane;response to retinoic acid;cytoplasm;mitochondrial fusion;protein targeting to mitochondrion;glutathione metabolic process;cytosol;integral component of membrane;cellular response to vitamin D;mitochondrion;mitochondrial fission	.	.	.	GDAP1
ENSG00000221866	2.38428	yes	up	7.86204e-05	yes	chr7	-	132168501	132169500	intron	internal intron	NA	ENST00000321063	0.697281	no	down	0.535944	no	GO:0002116;GO:0021636;GO:0021612;GO:0007399;GO:0016020;GO:0048485;GO:0021785;GO:0021637;GO:0017154;GO:0048812;GO:0048841;GO:0021644;GO:0016021;GO:0005886;GO:0007411;GO:0050923;GO:1902287;GO:0021793;GO:0007165;GO:0008045;GO:0021960;GO:0021615;GO:0021784;GO:0021602;GO:0021610;GO:0071526	semaphorin receptor complex;trigeminal nerve morphogenesis;facial nerve structural organization;nervous system development;membrane;sympathetic nervous system development;branchiomotor neuron axon guidance;trigeminal nerve structural organization;semaphorin receptor activity;neuron projection morphogenesis;regulation of axon extension involved in axon guidance;vagus nerve morphogenesis;integral c…	ko04360	Axon guidance	Organismal Systems	PLXNA4
ENSG00000115902	0.309551	yes	down	0.000121654	yes	chr2	+	64989501	64990500	intron	first intron	NA	ENST00000234256	0.713053	no	down	0.537265	no	GO:0030425;GO:0015826;GO:0016020;GO:0015824;GO:0043025;GO:0015186;GO:0006821;GO:0005887;GO:0015194;GO:1902476;GO:0034590;GO:0015193;GO:0070062;GO:0015175;GO:0006868;GO:0015825;GO:0050890;GO:0006865;GO:0035249;GO:0015184;GO:0042470;GO:0015293;GO:0015195;GO:0003333;GO:0016021;GO:0005254;GO:0034589;GO:0005886;GO:0006810;GO:0055085;GO:0035524;GO:0015808;GO:0005882;GO:0009986;GO:0015180;GO:0015171;GO:…	dendrite;threonine transport;membrane;proline transport;neuronal cell body;L-glutamine transmembrane transporter activity;chloride transport;integral component of plasma membrane;L-serine transmembrane transporter activity;chloride transmembrane transport;L-hydroxyproline transmembrane transporter activity;L-proline transmembrane transporter activity;extracellular vesicular exosome;neutral amino …	.	.	.	SLC1A4
ENSG00000154319	5.86792	yes	up	0.00011589	yes	chr8	-	11466001	11467000	exon	first exon	NA	ENST00000284486	0.708236	no	down	0.538183	no	GO:0005783;GO:0005515	endoplasmic reticulum;protein binding	.	.	.	FAM167A
ENSG00000187609	0.576988	yes	down	0.0010116	yes	chr9	-	137423501	137424500	promoter	Distal	ICP	ENST00000340951	0.709459	no	down	0.538852	no	GO:0005634;GO:0006139;GO:0005737;GO:0004518;GO:0003676;GO:0046872;GO:0004527;GO:0008408;GO:0016787;GO:0090305	nucleus;nucleobase-containing compound metabolic process;cytoplasm;nuclease activity;nucleic acid binding;metal ion binding;exonuclease activity;3'-5' exonuclease activity;hydrolase activity;nucleic acid phosphodiester bond hydrolysis	.	.	.	EXD3
ENSG00000143297	1.80851	yes	up	0.000251362	yes	chr1	-	157521001	157522000	downstream	NA	NA	ENST00000368190	0.710957	no	down	0.53938	no	GO:0016020;GO:0016021;GO:0005886;GO:0043235	membrane;integral component of membrane;plasma membrane;receptor complex	.	.	.	FCRL5
ENSG00000170456	0.738404	yes	down	0.000934982	yes	chr12	-	31422001	31423000	downstream	NA	NA	ENST00000354285	1.2761	no	up	0.540548	no	GO:0070588;GO:0016020;GO:0017112;GO:0005085;GO:0043547;GO:0061024;GO:0005829;GO:0050982;GO:0016021;GO:0005262	calcium ion transmembrane transport;membrane;Rab guanyl-nucleotide exchange factor activity;guanyl-nucleotide exchange factor activity;positive regulation of GTPase activity;membrane organization;cytosol;detection of mechanical stimulus;integral component of membrane;calcium channel activity	.	.	.	DENND5B
ENSG00000176454	1.73955	yes	up	0.00027982	yes	chr15	-	34356501	34357500	downstream	NA	NA	ENST00000563748	0.705397	no	down	0.540866	no	GO:0016020;GO:0047192;GO:0005783;GO:0003841;GO:0006654;GO:0036152;GO:0008654;GO:0036151;GO:0016021;GO:0047144;GO:0047184;GO:0016746;GO:0008152;GO:0036150;GO:0047166;GO:0006644;GO:0071617;GO:0005789;GO:0016740;GO:0036148;GO:0006629	membrane;1-alkylglycerophosphocholine O-acetyltransferase activity;endoplasmic reticulum;1-acylglycerol-3-phosphate O-acyltransferase activity;phosphatidic acid biosynthetic process;phosphatidylethanolamine acyl-chain remodeling;phospholipid biosynthetic process;phosphatidylcholine acyl-chain remodeling;integral component of membrane;2-acylglycerol-3-phosphate O-acyltransferase activity;1-acylgly…	ko00564;ko00565	Glycerophospholipid metabolism;Ether lipid metabolism	Metabolism;Metabolism	LPCAT4
ENSG00000137812	1.67918	yes	up	2.34113e-06	yes	chr15	+	40661501	40662500	exon	internal exon	NA	ENST00000533001	0.708667	no	down	0.543045	no	GO:0007059;GO:0071173;GO:0001675;GO:0034501;GO:0005515;GO:0005829;GO:0016604;GO:0010923;GO:0000777;GO:0070062;GO:0005634;GO:0005654;GO:0001669;GO:0005694;GO:0000775;GO:0008608;GO:0007062;GO:0051301;GO:0000776;GO:0034080;GO:0007049	chromosome segregation;spindle assembly checkpoint;acrosome assembly;protein localization to kinetochore;protein binding;cytosol;nuclear body;negative regulation of phosphatase activity;condensed chromosome kinetochore;extracellular vesicular exosome;nucleus;nucleoplasm;acrosomal vesicle;chromosome;chromosome, centromeric region;attachment of spindle microtubules to kinetochore;sister chromatid c…	.	.	.	KNL1
ENSG00000072840	2.7322	yes	up	2.33976e-07	yes	chr4	+	5756001	5757000	intron	last intron	NA	ENST00000264956	1.26302	no	up	0.545615	no	GO:0060170;GO:0005929;GO:0005856;GO:0016020;GO:0042995;GO:0051216;GO:0003416;GO:0007517;GO:0005737;GO:0036064;GO:0019538;GO:0045880;GO:0016021;GO:0007224;GO:0001501;GO:0005886	ciliary membrane;cilium;cytoskeleton;membrane;cell projection;cartilage development;endochondral bone growth;muscle organ development;cytoplasm;ciliary basal body;protein metabolic process;positive regulation of smoothened signaling pathway;integral component of membrane;smoothened signaling pathway;skeletal system development;plasma membrane	ko04340	Hedgehog signaling pathway	Environmental Information Processing	EVC
ENSG00000116213	1.35216	yes	up	5.1056e-05	yes	chr1	-	3654501	3655500	promoter	Distal	ICP	ENST00000378322	1.24943	no	up	0.545767	no	GO:0005856;GO:0005815;GO:0005813;GO:0030030;GO:0005737;GO:0005814;GO:0036064;GO:1902857;GO:0090307;GO:0005515	cytoskeleton;microtubule organizing center;centrosome;cell projection organization;cytoplasm;centriole;ciliary basal body;positive regulation of nonmotile primary cilium assembly;spindle assembly involved in mitosis;protein binding	.	.	.	WRAP73
ENSG00000264522	1.48828	yes	up	0.00104679	yes	chr1	-	149976501	149977500	exon	internal exon	NA	ENST00000581312	0.717996	no	down	0.54615	no	GO:0071108;GO:0004843;GO:0003677;GO:0008233;GO:0071947;GO:0005737;GO:0000122;GO:0002376;GO:0008234;GO:0016787;GO:0005515;GO:0005829;GO:0016579;GO:0008270;GO:0043124;GO:0002385;GO:0070536;GO:0005634;GO:0036459;GO:0002250;GO:0070530;GO:0046872;GO:0006508;GO:1900181;GO:0006955;GO:0032717;GO:1990380;GO:0035871	protein K48-linked deubiquitination;ubiquitin-specific protease activity;DNA binding;peptidase activity;protein deubiquitination involved in ubiquitin-dependent protein catabolic process;cytoplasm;negative regulation of transcription from RNA polymerase II promoter;immune system process;cysteine-type peptidase activity;hydrolase activity;protein binding;cytosol;protein deubiquitination;zinc ion b…	.	.	.	OTUD7B
ENSG00000035664	0.639257	yes	down	0.000140239	yes	chr15	-	63981501	63982500	downstream	NA	NA	ENST00000457488	0.710178	no	down	0.547131	no	GO:0016020;GO:0016310;GO:0005524;GO:0043276;GO:0031410;GO:0035556;GO:0005737;GO:0005515;GO:0004672;GO:0000166;GO:0016021;GO:0010506;GO:0005516;GO:1990266;GO:0043231;GO:0090023;GO:0016301;GO:0042802;GO:0006468;GO:0034423;GO:2001242;GO:0046777;GO:0006915;GO:0018107;GO:2000424;GO:0018105;GO:0004674;GO:0005794;GO:0016740;GO:0042981	membrane;phosphorylation;ATP binding;anoikis;cytoplasmic vesicle;intracellular signal transduction;cytoplasm;protein binding;protein kinase activity;nucleotide binding;integral component of membrane;regulation of autophagy;calmodulin binding;neutrophil migration;intracellular membrane-bounded organelle;positive regulation of neutrophil chemotaxis;kinase activity;identical protein binding;protein …	ko05200;ko05219;ko04140	Pathways in cancer;Bladder cancer;Autophagy - animal	Human Diseases;Human Diseases;Cellular Processes	DAPK2
ENSG00000158106	1.64294	yes	up	0.000534358	yes	chr8	+	143381501	143382500	exon	last exon	NA	ENST00000522335	1.27177	no	up	0.548804	no	GO:0005515;GO:0007165;GO:0005829	protein binding;signal transduction;cytosol	.	.	.	RHPN1
ENSG00000154188	1.63547	yes	up	3.13205e-07	yes	chr8	-	107335501	107336500	intron	internal intron	NA	ENST00000297450	1.24932	no	up	0.549341	no	GO:0007171;GO:0030210;GO:0050731;GO:0005615;GO:0007162;GO:0032680;GO:0005102;GO:0002092;GO:0010595;GO:0043116;GO:2000446;GO:0042308;GO:0070062;GO:0043393;GO:0001525;GO:0030154;GO:0043524;GO:0014068;GO:0005622;GO:0043066;GO:2000352;GO:0043122;GO:0048014;GO:0001933;GO:0045121;GO:0007275;GO:0033138;GO:0043536;GO:0050918;GO:0014842;GO:0034394;GO:0002040;GO:0051897;GO:0045785;GO:0043547;GO:0007169;GO:…	activation of transmembrane receptor protein tyrosine kinase activity;heparin biosynthetic process;positive regulation of peptidyl-tyrosine phosphorylation;extracellular space;negative regulation of cell adhesion;regulation of tumor necrosis factor production;receptor binding;positive regulation of receptor internalization;positive regulation of endothelial cell migration;negative regulation of v…	ko04015;ko04010;ko04066;ko04014;ko05323;ko04151	Rap1 signaling pathway;MAPK signaling pathway;HIF-1 signaling pathway;Ras signaling pathway;Rheumatoid arthritis;PI3K-Akt signaling pathway	Environmental Information Processing;Environmental Information Processing;Environmental Information Processing;Environmental Information Processing;Human Diseases;Environmental Information Processing	ANGPT1
ENSG00000175764	0.478095	yes	down	3.42628e-06	yes	chr9	-	122095501	122096500	promoter	Distal	ICP	ENST00000321582	0.701647	no	down	0.550188	no	GO:0005929;GO:0005856;GO:0042995;GO:0018095;GO:0070740;GO:0005874;GO:0005524;GO:0005737;GO:0016874;GO:0006464;GO:0005829;GO:0000166;GO:0051013	cilium;cytoskeleton;cell projection;protein polyglutamylation;tubulin-glutamic acid ligase activity;microtubule;ATP binding;cytoplasm;ligase activity;cellular protein modification process;cytosol;nucleotide binding;microtubule severing	.	.	.	TTLL11
ENSG00000156398	1.29397	yes	up	0.000718479	yes	chr10	+	102711501	102712500	promoter	Distal	ICP	ENST00000369893	0.718543	no	down	0.550292	no	GO:0006810;GO:0016020;GO:0055085;GO:0034220;GO:0015075;GO:0006811;GO:0055072;GO:0005743;GO:0016021;GO:0005739;GO:0031966	transport;membrane;transmembrane transport;ion transmembrane transport;ion transmembrane transporter activity;ion transport;iron ion homeostasis;mitochondrial inner membrane;integral component of membrane;mitochondrion;mitochondrial membrane	.	.	.	SFXN2
ENSG00000050030	1.46726	yes	up	7.91127e-11	yes	chrX	-	74924001	74925000	exon	internal exon	NA	ENST00000055682	1.26859	no	up	0.550852	no	GO:0007399;GO:0042276;GO:0005634;GO:0007275;GO:0016035	nervous system development;error-prone translesion synthesis;nucleus;multicellular organismal development;zeta DNA polymerase complex	.	.	.	NEXMIF
ENSG00000142731	1.72981	yes	up	0.00025978	yes	chr4	+	127882501	127883500	intron	internal intron	NA	ENST00000270861	1.24983	no	up	0.551585	no	GO:0016310;GO:0005524;GO:0001741;GO:0005737;GO:0046601;GO:0005730;GO:0005515;GO:0000166;GO:0004672;GO:0005829;GO:0005856;GO:0005634;GO:0042802;GO:0016301;GO:0006468;GO:0005813;GO:0007099;GO:0098535;GO:0098536;GO:0060707;GO:0005814;GO:0010389;GO:0032154;GO:0004674;GO:0000086;GO:0016740	phosphorylation;ATP binding;XY body;cytoplasm;positive regulation of centriole replication;nucleolus;protein binding;nucleotide binding;protein kinase activity;cytosol;cytoskeleton;nucleus;identical protein binding;kinase activity;protein phosphorylation;centrosome;centriole replication;de novo centriole assembly;deuterosome;trophoblast giant cell differentiation;centriole;regulation of G2/M tran…	ko04068	FoxO signaling pathway	Environmental Information Processing	PLK4
ENSG00000079931	0.414815	yes	down	6.46181e-08	yes	chr6	-	132313501	132314500	downstream	NA	NA	ENST00000367963	1.27678	no	up	0.551804	no	GO:0016020;GO:0005615;GO:0005783;GO:0055114;GO:0042420;GO:0004500;GO:0005515;GO:0005507;GO:0016021;GO:0016491;GO:0030667;GO:0003824;GO:0006589;GO:0046872;GO:0042421;GO:0004497;GO:0005789;GO:0016715	membrane;extracellular space;endoplasmic reticulum;oxidation-reduction process;dopamine catabolic process;dopamine beta-monooxygenase activity;protein binding;copper ion binding;integral component of membrane;oxidoreductase activity;secretory granule membrane;catalytic activity;octopamine biosynthetic process;metal ion binding;norepinephrine biosynthetic process;monooxygenase activity;endoplasmic…	.	.	.	MOXD1
ENSG00000185774	3	yes	up	8.57819e-09	yes	chr4	-	21948001	21949000	exon	first exon	NA	ENST00000382148	1.26961	no	up	0.552407	no	GO:0016020;GO:0005783;GO:0005737;GO:1901379;GO:0005829;GO:0005886;GO:0008076;GO:0006810;GO:0005244;GO:0006813;GO:0061337;GO:0072659;GO:0015459;GO:0005267;GO:0034765;GO:0006811;GO:0046872;GO:0065009;GO:0005509;GO:0071805	membrane;endoplasmic reticulum;cytoplasm;regulation of potassium ion transmembrane transport;cytosol;plasma membrane;voltage-gated potassium channel complex;transport;voltage-gated ion channel activity;potassium ion transport;cardiac conduction;protein localization to plasma membrane;potassium channel regulator activity;potassium channel activity;regulation of ion transmembrane transport;ion tran…	.	.	.	KCNIP4
ENSG00000164530	2.09772	yes	up	0.000248728	yes	chr6	+	36953001	36954000	promoter	Distal	LCP	ENST00000373674	1.25882	no	up	0.552608	no	GO:0070062;GO:0010466;GO:0005576;GO:0030414	extracellular vesicular exosome;negative regulation of peptidase activity;extracellular region;peptidase inhibitor activity	.	.	.	PI16
ENSG00000168566	0.511811	yes	down	3.33026e-07	yes	chr6	+	7611501	7612500	downstream	NA	NA	ENST00000342415	0.719767	no	down	0.553994	no	GO:0006397;GO:0005654;GO:0005634;GO:0000398;GO:0003676;GO:0046872;GO:0005681;GO:0005829;GO:0005689;GO:0008380	mRNA processing;nucleoplasm;nucleus;mRNA splicing, via spliceosome;nucleic acid binding;metal ion binding;spliceosomal complex;cytosol;U12-type spliceosomal complex;RNA splicing	.	.	.	SNRNP48
ENSG00000134508	0.62772	yes	down	8.99149e-05	yes	chr18	+	23148001	23149000	promoter	Intermediate	LCP	ENST00000256925	0.702058	no	down	0.555781	no	GO:0007399;GO:0005634;GO:0005737;GO:0005515;GO:0051301;GO:0005829;GO:0051726;GO:0007049	nervous system development;nucleus;cytoplasm;protein binding;cell division;cytosol;regulation of cell cycle;cell cycle	.	.	.	CABLES1
ENSG00000173918	1.40032	yes	up	0.000472876	yes	chr17	+	79048001	79049000	downstream	NA	NA	ENST00000339142	1.75246	no	up	1	no	GO:0051897;GO:0005615;GO:0051260;GO:0010544;GO:0005515;GO:0005887;GO:0005829;GO:0070208;GO:0010906;GO:0005576;GO:0005581;GO:0090331;GO:0005634;GO:0010628;GO:0005518;GO:2000860;GO:0007204;GO:0043410	positive regulation of protein kinase B signaling;extracellular space;protein homooligomerization;negative regulation of platelet activation;protein binding;integral component of plasma membrane;cytosol;protein heterotrimerization;regulation of glucose metabolic process;extracellular region;collagen trimer;negative regulation of platelet aggregation;nucleus;positive regulation of gene expression;…	.	.	.	C1QTNF1
ENSG00000178409	1.38214	yes	up	1.57565e-05	yes	chr6	-	107068001	107069000	exon	last exon	NA	ENST00000429433	0.71985	no	down	0.55819	no	GO:0098532;GO:0000182;GO:0036124;GO:0003677;GO:0005654;GO:0005634;GO:0006355;GO:0006351;GO:0006306;GO:0000122;GO:0034773;GO:0043967;GO:0005515;GO:0005730;GO:0016569;GO:0000183;GO:0080182;GO:0005720	histone H3-K27 trimethylation;rDNA binding;histone H3-K9 trimethylation;DNA binding;nucleoplasm;nucleus;regulation of transcription, DNA-templated;transcription, DNA-templated;DNA methylation;negative regulation of transcription from RNA polymerase II promoter;histone H4-K20 trimethylation;histone H4 acetylation;protein binding;nucleolus;covalent chromatin modification;chromatin silencing at rDNA…	.	.	.	BEND3
ENSG00000152953	0.530159	yes	down	7.04633e-06	yes	chr4	+	5432501	5433500	promoter	Proximal	LCP	ENST00000282908	1.27447	no	up	0.5589	no	GO:0016310;GO:0005524;GO:0016301;GO:0005622;GO:0006468;GO:0035556;GO:0046872;GO:0018105;GO:0004674;GO:0000166;GO:0004672;GO:0016740	phosphorylation;ATP binding;kinase activity;intracellular;protein phosphorylation;intracellular signal transduction;metal ion binding;peptidyl-serine phosphorylation;protein serine/threonine kinase activity;nucleotide binding;protein kinase activity;transferase activity	.	.	.	STK32B
ENSG00000075223	1.66272	yes	up	0.000324794	yes	chr7	-	80919001	80920000	promoter	Intermediate	ICP	ENST00000265361	1.23691	no	up	0.559185	no	GO:0007399;GO:0005615;GO:0050919;GO:0030215;GO:0060666;GO:0009791;GO:0021915;GO:0001756;GO:0005576;GO:0003215;GO:0007411;GO:0070062;GO:0042493;GO:0003350;GO:0030154;GO:0001755;GO:0007507;GO:0003151;GO:0060174;GO:0001974;GO:0007275;GO:0006955;GO:0038191	nervous system development;extracellular space;negative chemotaxis;semaphorin receptor binding;dichotomous subdivision of terminal units involved in salivary gland branching;post-embryonic development;neural tube development;somitogenesis;extracellular region;cardiac right ventricle morphogenesis;axon guidance;extracellular vesicular exosome;response to drug;pulmonary myocardium development;cell …	ko04360	Axon guidance	Organismal Systems	SEMA3C
ENSG00000234814	1.8134	yes	up	2.79212e-07	yes	chr10	+	30704001	30705000	intron	internal intron	NA	ENST00000422642	1.26537	no	up	0.559382	no	.	.	.	.	.	SVILP1
ENSG00000205683	0.714164	yes	down	0.000187943	yes	chr14	-	72671001	72672000	intron	internal intron	NA	ENST00000541685	0.71281	no	down	0.560159	no	GO:0007399;GO:0005654;GO:0046872;GO:0005634;GO:0016569;GO:0006355;GO:0008270;GO:0006351;GO:0071565;GO:0003676	nervous system development;nucleoplasm;metal ion binding;nucleus;covalent chromatin modification;regulation of transcription, DNA-templated;zinc ion binding;transcription, DNA-templated;nBAF complex;nucleic acid binding	ko05225	Hepatocellular carcinoma	Human Diseases	DPF3
ENSG00000132010	1.48251	yes	up	8.02714e-05	yes	chr19	-	12131001	12132000	downstream	NA	NA	ENST00000334213	0.708128	no	down	0.56174	no	GO:0003677;GO:0046872;GO:0005634;GO:0005515;GO:0006355;GO:0005622;GO:0006351;GO:0003676	DNA binding;metal ion binding;nucleus;protein binding;regulation of transcription, DNA-templated;intracellular;transcription, DNA-templated;nucleic acid binding	.	.	.	ZNF20
ENSG00000165113	1.99438	yes	up	0.000347202	yes	chr9	-	83792001	83793000	exon	internal exon	NA	ENST00000388782	0.713293	no	down	0.564338	no	GO:0016310;GO:0005515;GO:0007165;GO:0042802;GO:0016301;GO:0005794	phosphorylation;protein binding;signal transduction;identical protein binding;kinase activity;Golgi apparatus	.	.	.	GKAP1
ENSG00000243244	1.56757	yes	up	0.000569297	yes	chr2	+	48595501	48596500	exon	last exon	NA	ENST00000484110	0.712302	no	down	0.565439	no	GO:0016020;GO:0030100;GO:0006897;GO:0005737	membrane;regulation of endocytosis;endocytosis;cytoplasm	.	.	.	STON1
ENSG00000198722	0.283912	yes	down	2.0591e-07	yes	chr9	+	35385501	35386500	intron	internal intron	NA	ENST00000635942	1.23654	no	up	0.565718	no	GO:0007528;GO:0016020;GO:0030054;GO:1900426;GO:0005737;GO:0007269;GO:0043065;GO:0031914;GO:0005515;GO:0048172;GO:0017137;GO:0005622;GO:0071333;GO:0035249;GO:0090382;GO:0048786;GO:0032009;GO:0031594;GO:0030742;GO:0035556;GO:0016079;GO:0005829;GO:0010808;GO:0005516;GO:0005886;GO:0045202;GO:0060384;GO:0097470;GO:0019992;GO:0044305;GO:0043195;GO:0016082;GO:0097151;GO:0050714;GO:0046872;GO:0005794;GO:…	neuromuscular junction development;membrane;cell junction;positive regulation of defense response to bacterium;cytoplasm;neurotransmitter secretion;positive regulation of apoptotic process;negative regulation of synaptic plasticity;protein binding;regulation of short-term neuronal synaptic plasticity;Rab GTPase binding;intracellular;cellular response to glucose stimulus;synaptic transmission, glu…	ko04721	Synaptic vesicle cycle	Organismal Systems	UNC13B
ENSG00000181638	1.57939	yes	up	0.000357965	yes	chr8	+	143255001	143256000	downstream	NA	NA	ENST00000330701	1.24435	no	up	0.566597	no	GO:0003676	nucleic acid binding	.	.	.	ZFP41
ENSG00000139289	1.90637	yes	up	0.000968519	yes	chr12	-	76034501	76035500	promoter	Distal	LCP	ENST00000266671	0.711672	no	down	0.567616	no	GO:0005634;GO:0031410;GO:0045210;GO:0005737;GO:0006915;GO:0005730;GO:0005515;GO:0005829;GO:0000086	nucleus;cytoplasmic vesicle;FasL biosynthetic process;cytoplasm;apoptotic process;nucleolus;protein binding;cytosol;G2/M transition of mitotic cell cycle	.	.	.	PHLDA1
ENSG00000102349	1.37955	yes	up	8.28816e-05	yes	chrX	+	56283501	56284500	exon	last exon	NA	ENST00000468660	0.725103	no	down	0.568334	no	GO:0000978;GO:0003677;GO:0005654;GO:0005634;GO:0016235;GO:0006355;GO:0006351;GO:0001078;GO:0003676;GO:0000122;GO:0046872;GO:0005829	RNA polymerase II core promoter proximal region sequence-specific DNA binding;DNA binding;nucleoplasm;nucleus;aggresome;regulation of transcription, DNA-templated;transcription, DNA-templated;RNA polymerase II core promoter proximal region sequence-specific DNA binding transcription factor activity involved in negative regulation of transcription;nucleic acid binding;negative regulation of transc…	.	.	.	KLF8
ENSG00000166432	0.555785	yes	down	0.000587833	yes	chrX	-	101898001	101899000	exon	internal exon	NA	ENST00000458570	0.713847	no	down	0.569673	no	GO:0072332;GO:0003723;GO:0003677;GO:0046872;GO:0005634;GO:0002039;GO:0008270;GO:0003676	intrinsic apoptotic signaling pathway by p53 class mediator;RNA binding;DNA binding;metal ion binding;nucleus;p53 binding;zinc ion binding;nucleic acid binding	.	.	.	ZMAT1
ENSG00000197256	0.651877	yes	down	0.000442397	yes	chr19	-	11174501	11175500	promoter	Proximal	LCP	ENST00000586659	1.24448	no	up	0.570589	no	GO:0070563;GO:0043069;GO:0006355;GO:0006351;GO:0005737;GO:2000134;GO:0006915;GO:0000122;GO:0005515;GO:0005739;GO:0033147;GO:0008285	negative regulation of vitamin D receptor signaling pathway;negative regulation of programmed cell death;regulation of transcription, DNA-templated;transcription, DNA-templated;cytoplasm;negative regulation of G1/S transition of mitotic cell cycle;apoptotic process;negative regulation of transcription from RNA polymerase II promoter;protein binding;mitochondrion;negative regulation of intracellul…	.	.	.	KANK2
ENSG00000037042	1.35681	yes	up	8.11131e-05	yes	chr17	+	42668001	42669000	downstream	NA	NA	ENST00000588870	0.713991	no	down	0.571131	no	GO:0005874;GO:0005881;GO:0005737;GO:0000242;GO:0005829;GO:0000166;GO:0007017;GO:0005876;GO:0031122;GO:0005856;GO:0005815;GO:0015630;GO:0005813;GO:0003924;GO:0007020;GO:0000930;GO:0005525;GO:0005198	microtubule;cytoplasmic microtubule;cytoplasm;pericentriolar material;cytosol;nucleotide binding;microtubule-based process;spindle microtubule;cytoplasmic microtubule organization;cytoskeleton;microtubule organizing center;microtubule cytoskeleton;centrosome;GTPase activity;microtubule nucleation;gamma-tubulin complex;GTP binding;structural molecule activity	ko05165	Human papillomavirus infection	Human Diseases	TUBG2
ENSG00000214063	0.636959	yes	down	0.000120807	yes	chr11	+	866501	867500	downstream	NA	NA	ENST00000397406	0.720813	no	down	0.571608	no	GO:0016020;GO:0005925;GO:0007166;GO:0031982;GO:0005515;GO:0005887;GO:0005178;GO:0016021;GO:0006461;GO:0005886;GO:0003823	membrane;focal adhesion;cell surface receptor signaling pathway;vesicle;protein binding;integral component of plasma membrane;integrin binding;integral component of membrane;protein complex assembly;plasma membrane;antigen binding	.	.	.	TSPAN4
ENSG00000167186	0.163551	yes	down	0.00050106	yes	chr16	+	19067501	19068500	intron	first intron	NA	ENST00000569127	0.724678	no	down	0.573468	no	GO:0016709;GO:0016020;GO:0005634;GO:0031314;GO:0006744;GO:0055114;GO:0046872;GO:0005515;GO:0005743;GO:0004497;GO:0005739;GO:0016491	oxidoreductase activity, acting on paired donors, with incorporation or reduction of molecular oxygen, NAD(P)H as one donor, and incorporation of one atom of oxygen;membrane;nucleus;extrinsic component of mitochondrial inner membrane;ubiquinone biosynthetic process;oxidation-reduction process;metal ion binding;protein binding;mitochondrial inner membrane;monooxygenase activity;mitochondrion;oxido…	ko00130	Ubiquinone and other terpenoid-quinone biosynthesis	Metabolism	COQ7
ENSG00000147852	1.88144	yes	up	0.000371107	yes	chr9	+	2661501	2662500	downstream	NA	NA	ENST00000382100	0.716995	no	down	0.573838	no	GO:0034436;GO:0016020;GO:0005615;GO:0034185;GO:0005515;GO:0038026;GO:0034361;GO:0034437;GO:0048306;GO:0032802;GO:0007411;GO:0005765;GO:1900006;GO:0007165;GO:0030229;GO:0006898;GO:0034189;GO:0006629;GO:0007399;GO:0008203;GO:0006869;GO:0038025;GO:0043235;GO:0008202;GO:0000122;GO:0045860;GO:0016021;GO:0006897;GO:0005886;GO:0006810;GO:0021517;GO:0048813;GO:0005041;GO:0007613;GO:0005905;GO:0005509;GO:…	glycoprotein transport;membrane;extracellular space;apolipoprotein binding;protein binding;reelin-mediated signaling pathway;very-low-density lipoprotein particle;glycoprotein transporter activity;calcium-dependent protein binding;low-density lipoprotein particle receptor catabolic process;axon guidance;lysosomal membrane;positive regulation of dendrite development;signal transduction;very-low-de…	.	.	.	VLDLR
ENSG00000105173	2.73272	yes	up	0.000276529	yes	chr19	+	29812001	29813000	exon	last exon	NA	ENST00000357943	0.719076	no	down	0.574641	no	GO:0045859;GO:0016538;GO:0030521;GO:0019901;GO:0045893;GO:0000122;GO:0000307;GO:0000083;GO:0050681;GO:0005515;GO:0005829;GO:0007129;GO:0005634;GO:0005654;GO:0016301;GO:0006270;GO:0006468;GO:0097134;GO:0070192;GO:0003713;GO:0051301;GO:0016055;GO:0000082;GO:0051726;GO:0007049;GO:0000723	regulation of protein kinase activity;cyclin-dependent protein serine/threonine kinase regulator activity;androgen receptor signaling pathway;protein kinase binding;positive regulation of transcription, DNA-templated;negative regulation of transcription from RNA polymerase II promoter;cyclin-dependent protein kinase holoenzyme complex;regulation of transcription involved in G1/S transition of mit…	ko05215;ko04218;ko05162;ko05206;ko05203;ko05165;ko05222;ko05200;ko04115;ko04151;ko04110;ko05226;ko05161;ko04114	Prostate cancer;Cellular senescence;Measles;MicroRNAs in cancer;Viral carcinogenesis;Human papillomavirus infection;Small cell lung cancer;Pathways in cancer;p53 signaling pathway;PI3K-Akt signaling pathway;Cell cycle;Gastric cancer;Hepatitis B;Oocyte meiosis	Human Diseases;Cellular Processes;Human Diseases;Human Diseases;Human Diseases;Human Diseases;Human Diseases;Human Diseases;Cellular Processes;Environmental Information Processing;Cellular Processes;Human Diseases;Human Diseases;Cellular Processes	CCNE1
ENSG00000180921	0.781222	yes	down	2.33911e-05	yes	chr8	-	143727501	143728500	promoter	Proximal	ICP	ENST00000388913	1.23092	no	up	0.578522	no	GO:0005856;GO:0030335;GO:0044380;GO:0045104;GO:0005737;GO:0019901;GO:1990254;GO:0031214;GO:0045095	cytoskeleton;positive regulation of cell migration;protein localization to cytoskeleton;intermediate filament cytoskeleton organization;cytoplasm;protein kinase binding;keratin filament binding;biomineral tissue development;keratin filament	.	.	.	FAM83H
ENSG00000188807	inf	yes	up	2.67703e-11	yes	chr1	+	9588501	9589500	intron	first intron	NA	ENST00000340381	1.24113	no	up	0.579099	no	GO:0051015;GO:0005856;GO:0016020;GO:0031965;GO:0000922;GO:0005634;GO:0005521;GO:0005737;GO:0010761;GO:0016021;GO:0005637;GO:0007097	actin filament binding;cytoskeleton;membrane;nuclear membrane;spindle pole;nucleus;lamin binding;cytoplasm;fibroblast migration;integral component of membrane;nuclear inner membrane;nuclear migration	.	.	.	TMEM201
ENSG00000168502	1.41456	yes	up	0.000202318	yes	chr18	+	8833501	8834500	downstream	NA	NA	ENST00000306329	0.72031	no	down	0.580735	no	GO:0016020;GO:0000922;GO:0005615;GO:0003723;GO:0016324;GO:0097427;GO:0005737;GO:0030496;GO:0016328;GO:0010506;GO:0005886;GO:0005856;GO:0016327;GO:2000576;GO:0042803;GO:0008017;GO:0090314;GO:0001578;GO:0045197	membrane;spindle pole;extracellular space;RNA binding;apical plasma membrane;microtubule bundle;cytoplasm;midbody;lateral plasma membrane;regulation of autophagy;plasma membrane;cytoskeleton;apicolateral plasma membrane;positive regulation of microtubule motor activity;protein homodimerization activity;microtubule binding;positive regulation of protein targeting to membrane;microtubule bundle for…	.	.	.	MTCL1
ENSG00000106366	2.26984	yes	up	2.36248e-06	yes	chr7	+	101124501	101125500	promoter	Distal	LCP	ENST00000223095	1.22587	no	up	0.580987	no	GO:0005615;GO:0010951;GO:0071222;GO:0005102;GO:0051918;GO:0002576;GO:0005515;GO:0045766;GO:0010469;GO:0042730;GO:0070062;GO:0010466;GO:0001525;GO:0061044;GO:0090026;GO:0032757;GO:2000352;GO:0030414;GO:0030198;GO:0045944;GO:0030194;GO:0001300;GO:0050829;GO:0050729;GO:0035491;GO:0005576;GO:0061045;GO:1902042;GO:0005886;GO:0031012;GO:0002020;GO:0007623;GO:0030195;GO:0004867;GO:0033629;GO:0010757;GO:…	extracellular space;negative regulation of endopeptidase activity;cellular response to lipopolysaccharide;receptor binding;negative regulation of fibrinolysis;platelet degranulation;protein binding;positive regulation of angiogenesis;regulation of receptor activity;fibrinolysis;extracellular vesicular exosome;negative regulation of peptidase activity;angiogenesis;negative regulation of vascular w…	ko04371;ko04218;ko04066;ko04390;ko04933;ko04115;ko05142;ko04610	Apelin signaling pathway;Cellular senescence;HIF-1 signaling pathway;Hippo signaling pathway;AGE-RAGE signaling pathway in diabetic complications;p53 signaling pathway;Chagas disease (American trypanosomiasis);Complement and coagulation cascades	Environmental Information Processing;Cellular Processes;Environmental Information Processing;Environmental Information Processing;Human Diseases;Cellular Processes;Human Diseases;Organismal Systems	SERPINE1
ENSG00000143297	1.80851	yes	up	0.000251362	yes	chr1	-	157521001	157522000	downstream	NA	NA	ENST00000368189	1.21728	no	up	0.583055	no	GO:0016020;GO:0016021;GO:0005886;GO:0043235	membrane;integral component of membrane;plasma membrane;receptor complex	.	.	.	FCRL5
ENSG00000173040	1.5572	yes	up	0.000378149	yes	chr4	-	5697001	5698000	intron	internal intron	NA	ENST00000310917	0.733348	no	down	0.585206	no	GO:0060170;GO:0005929;GO:0005856;GO:0016020;GO:0042995;GO:0005634;GO:0005737;GO:0016021;GO:0007224;GO:0005886	ciliary membrane;cilium;cytoskeleton;membrane;cell projection;nucleus;cytoplasm;integral component of membrane;smoothened signaling pathway;plasma membrane	ko04340	Hedgehog signaling pathway	Environmental Information Processing	EVC2
ENSG00000182378	1.67075	yes	up	1.91754e-05	yes	chrX	+	300501	301500	exon	last exon	NA	ENST00000381657	0.736273	no	down	0.585691	no	GO:0008081;GO:0005737;GO:0006629	phosphoric diester hydrolase activity;cytoplasm;lipid metabolic process	.	.	.	PLCXD1
ENSG00000158555	2.44269	yes	up	1.77705e-05	yes	chr11	-	75526001	75527000	promoter	Distal	ICP	ENST00000526177	0.734915	no	down	0.586327	no	GO:0007399;GO:0016020;GO:0042995;GO:0097038;GO:0045666;GO:0008889;GO:0005737;GO:0043025;GO:0012505;GO:0030426;GO:0016787;GO:0005515;GO:0031175;GO:0016021;GO:0030424;GO:0021895;GO:0048471;GO:0048505;GO:0008081;GO:0047389;GO:0045746;GO:0021522;GO:0045787;GO:0006629	nervous system development;membrane;cell projection;perinuclear endoplasmic reticulum;positive regulation of neuron differentiation;glycerophosphodiester phosphodiesterase activity;cytoplasm;neuronal cell body;endomembrane system;growth cone;hydrolase activity;protein binding;neuron projection development;integral component of membrane;axon;cerebral cortex neuron differentiation;perinuclear regio…	.	.	.	GDPD5
ENSG00000168389	1.35941	yes	up	0.000108262	yes	chr1	+	39962001	39963000	promoter	Distal	LCP	ENST00000372811	1.21407	no	up	0.586379	no	GO:0051978;GO:0016020;GO:0005783;GO:0021766;GO:0006869;GO:0015293;GO:0005887;GO:0051977;GO:0016021;GO:0005886;GO:1990379;GO:0006810;GO:0055085;GO:0015908;GO:0060856;GO:0015245;GO:0005789;GO:0006656;GO:0045056;GO:0005548	lysophospholipid transporter activity;membrane;endoplasmic reticulum;hippocampus development;lipid transport;symporter activity;integral component of plasma membrane;lysophospholipid transport;integral component of membrane;plasma membrane;lipid transport across blood brain barrier;transport;transmembrane transport;fatty acid transport;establishment of blood-brain barrier;fatty acid transporter a…	.	.	.	MFSD2A
ENSG00000122971	1.48865	yes	up	0.0008706	yes	chr12	+	120739001	120740000	downstream	NA	NA	ENST00000242592	1.2201	no	up	0.586714	no	GO:0005759;GO:0016627;GO:0005654;GO:0005634;GO:0008152;GO:0050660;GO:0055114;GO:0006635;GO:0004085;GO:0006631;GO:0003995;GO:0005739;GO:0016491;GO:0006629	mitochondrial matrix;oxidoreductase activity, acting on the CH-CH group of donors;nucleoplasm;nucleus;metabolic process;flavin adenine dinucleotide binding;oxidation-reduction process;fatty acid beta-oxidation;butyryl-CoA dehydrogenase activity;fatty acid metabolic process;acyl-CoA dehydrogenase activity;mitochondrion;oxidoreductase activity;lipid metabolic process	ko00071;ko00280;ko00650	Fatty acid degradation;Valine, leucine and isoleucine degradation;Butanoate metabolism	Metabolism;Metabolism;Metabolism	ACADS
ENSG00000205978	0.524964	yes	down	0.000251749	yes	chr14	+	24414001	24415000	exon	last exon	NA	ENST00000382554	0.731588	no	down	0.587042	no	GO:0015074;GO:0016020;GO:0016021;GO:0003676	DNA integration;membrane;integral component of membrane;nucleic acid binding	.	.	.	NYNRIN
ENSG00000132846	1.5502	yes	up	0.000923659	yes	chr5	-	77076501	77077500	downstream	NA	NA	ENST00000255198	1.22345	no	up	0.588066	no	GO:0016020;GO:0003677;GO:0005737;GO:0090263;GO:0003676;GO:0046872;GO:0001933;GO:0005829;GO:0045944;GO:0016055;GO:0050821	membrane;DNA binding;cytoplasm;positive regulation of canonical Wnt signaling pathway;nucleic acid binding;metal ion binding;negative regulation of protein phosphorylation;cytosol;positive regulation of transcription from RNA polymerase II promoter;Wnt signaling pathway;protein stabilization	.	.	.	ZBED3
ENSG00000116299	0.518519	yes	down	1.24083e-05	yes	chr1	+	109186501	109187500	exon	first exon	NA	ENST00000369939	0.738924	no	down	0.588932	no	GO:0016020;GO:0003723;GO:0009267;GO:0005770;GO:0005887;GO:0016021;GO:0006914;GO:0005886;GO:0005765;GO:0070062;GO:0031902;GO:0005764;GO:0005802;GO:0005768;GO:0044090;GO:0005794;GO:2000786;GO:0000045	membrane;RNA binding;cellular response to starvation;late endosome;integral component of plasma membrane;integral component of membrane;autophagy;plasma membrane;lysosomal membrane;extracellular vesicular exosome;late endosome membrane;lysosome;trans-Golgi network;endosome;positive regulation of vacuole organization;Golgi apparatus;positive regulation of autophagic vacuole assembly;autophagic vac…	.	.	.	KIAA1324
ENSG00000029993	1.35901	yes	up	0.000570053	yes	chrX	+	150985501	150986500	intron	last intron	NA	ENST00000325307	1.22001	no	up	0.589156	no	GO:0003723;GO:0003677;GO:0006355;GO:0045638;GO:0003690;GO:0005737;GO:0032392;GO:0002376;GO:0005515;GO:0045087;GO:0005634;GO:0006351;GO:0005694;GO:0045578;GO:0007275;GO:0006310;GO:0008301;GO:0000400	RNA binding;DNA binding;regulation of transcription, DNA-templated;negative regulation of myeloid cell differentiation;double-stranded DNA binding;cytoplasm;DNA geometric change;immune system process;protein binding;innate immune response;nucleus;transcription, DNA-templated;chromosome;negative regulation of B cell differentiation;multicellular organismal development;DNA recombination;DNA binding…	.	.	.	HMGB3
ENSG00000152582	1.43337	yes	up	0.000482114	yes	chr5	+	35759501	35760500	intron	internal intron	NA	ENST00000282469	0.737122	no	down	0.589533	no	GO:0003676	nucleic acid binding	.	.	.	SPEF2
ENSG00000157870	2.49275	yes	up	0.000177975	yes	chr1	+	2584001	2585000	promoter	Distal	ICP	ENST00000476686	1.22717	no	up	0.58998	no	GO:0070062;GO:0016616;GO:0005783;GO:0043209;GO:0047017;GO:0055114;GO:0005737;GO:0016209;GO:0006693;GO:0005829;GO:0006631;GO:0006633;GO:0001516;GO:0016491;GO:0006629	extracellular vesicular exosome;oxidoreductase activity, acting on the CH-OH group of donors, NAD or NADP as acceptor;endoplasmic reticulum;myelin sheath;prostaglandin-F synthase activity;oxidation-reduction process;cytoplasm;antioxidant activity;prostaglandin metabolic process;cytosol;fatty acid metabolic process;fatty acid biosynthetic process;prostaglandin biosynthetic process;oxidoreductase a…	ko00590	Arachidonic acid metabolism	Metabolism	FAM213B
ENSG00000120262	1.77346	yes	up	0.000290484	yes	chr6	+	151591001	151592000	promoter	Distal	LCP	ENST00000239374	1.21767	no	up	0.59182	no	GO:0005515	protein binding	.	.	.	CCDC170
ENSG00000008086	1.47821	yes	up	2.52192e-05	yes	chrX	+	18442501	18443500	promoter	Proximal	LCP	ENST00000623535	1.20811	no	up	0.592045	no	GO:0016310;GO:0005524;GO:0048365;GO:0032587;GO:0043547;GO:0045773;GO:0000166;GO:0004672;GO:0005829;GO:0045202;GO:0032839;GO:0050775;GO:0005634;GO:0005654;GO:0016301;GO:0006468;GO:0044294;GO:0048471;GO:0046777;GO:0060999;GO:0050773;GO:0004674;GO:0001764;GO:0016740	phosphorylation;ATP binding;Rac GTPase binding;ruffle membrane;positive regulation of GTPase activity;positive regulation of axon extension;nucleotide binding;protein kinase activity;cytosol;synapse;dendrite cytoplasm;positive regulation of dendrite morphogenesis;nucleus;nucleoplasm;kinase activity;protein phosphorylation;dendritic growth cone;perinuclear region of cytoplasm;protein autophosphory…	.	.	.	CDKL5
[truncated: 9,704 more rows]
