# Supplementary material for: Signalling networks constructed by integrative analysis of multi-omics in peripheral blood mononuclear cells in systemic lupus erythematous patients
Source: Research Square preprint supplement (doi:10.21203/rs.3.rs-60254/v1), 2021-04-21
Supplement: Supplementary file 2 [file a028eec7e768e3fc103a4b92.xlsx]

## Sheet: network
Gene	Pathyway				gene	miRNA
PIK3R3	JAK-STAT				BIRC2	hsa-miR-145-3p_L-2R+1
IL7	JAK-STAT				BIRC2	hsa-miR-203a-3p_R+1
IL13RA2	JAK-STAT				BIRC2	hsa-miR-211-5p
IL23R	JAK-STAT				BIRC2	hsa-miR-29b-1-5p
EGFR	JAK-STAT				BIRC2	hsa-miR-29b-2-5p_R+1
PDGFB	JAK-STAT				BIRC2	hsa-miR-4422_R+1
LIFR	JAK-STAT				BIRC2	hsa-miR-5006-3p_R+1
PRLR	JAK-STAT				BIRC2	hsa-miR-539-5p_R+1
SOCS6	JAK-STAT				BIRC2	hsa-miR-624-5p_R-1
GHR	JAK-STAT				BIRC2	hsa-miR-6513-3p_R+1
PIAS2	JAK-STAT				BIRC2	hsa-mir-4473-p5
PIK3CA	JAK-STAT				BIRC2	mdo-miR-26-5p_L+1R+1
STAT1	JAK-STAT				BIRC2	mmu-miR-5124a_L-1R-1_1ss5CA
STAT3	JAK-STAT				GHR	PC-3p-50140_5
BOK	APOPTOSIS				GHR	PC-3p-9143_61
HTRA2	APOPTOSIS				GHR	PC-5p-25632_13
BIRC2	APOPTOSIS				GHR	bta-miR-6119-5p
BID	APOPTOSIS				GHR	bta-mir-677-p3
PRF1	APOPTOSIS				GHR	chi-miR-16b-5p
ATP5I	OXIDATION				GHR	cja-miR-9983_L-1R+1
ATP5C1	OXIDATION				GHR	hsa-miR-103a-1-5p
NDUFB6	OXIDATION				GHR	hsa-miR-103a-2-5p_R+1
NDUFC2	OXIDATION				GHR	hsa-miR-1229-3p
					GHR	hsa-miR-1270
					GHR	hsa-miR-129-5p
					GHR	hsa-miR-1298-5p
					GHR	hsa-miR-145-3p_L-2R+1
					GHR	hsa-miR-181b-2-3p
					GHR	hsa-miR-221-5p
					GHR	hsa-miR-2276-3p
					GHR	hsa-miR-299-3p
					GHR	hsa-miR-30d-3p
					GHR	hsa-miR-3140-5p
					GHR	hsa-miR-320a-3p
					GHR	hsa-miR-320b_R-2
					GHR	hsa-miR-335-3p
					GHR	hsa-miR-363-3p_R+1
					GHR	hsa-miR-377-5p
					GHR	hsa-miR-409-3p
					GHR	hsa-miR-432-5p_1ss23GT
					GHR	hsa-miR-4433b-3p_L+1_1ss9GC
					GHR	hsa-miR-450a-2-3p_L-1
					GHR	hsa-miR-4659a-3p
					GHR	hsa-miR-4659b-3p_L+1R-1
					GHR	hsa-miR-4701-5p_L+1
					GHR	hsa-miR-4742-3p_L-2R+1
					GHR	hsa-miR-487a-5p
					GHR	hsa-miR-491-5p
					GHR	hsa-miR-497-5p
					GHR	hsa-miR-539-5p_R+1
					GHR	hsa-miR-545-3p
					GHR	hsa-miR-550a-3-5p_R+1
					GHR	hsa-miR-5695_L-1R+1
					GHR	hsa-miR-624-5p_R-1
					GHR	hsa-miR-627-5p_1ss2TG
					GHR	hsa-miR-6503-5p_1ss23AT
					GHR	hsa-miR-6511a-3p_R+1
					GHR	hsa-miR-6837-3p
					GHR	hsa-miR-873-3p
					GHR	hsa-mir-1268a-p3_1ss7GA
					GHR	hsa-mir-548y-p3_1ss1CT
					GHR	mmu-let-7j_R-2
					GHR	ppy-mir-1268-p3_1ss11TC
					GHR	ssc-mir-1285-p5_1ss18TC
					PRLR	PC-3p-32105_9
					PRLR	PC-5p-43610_5
					PRLR	bta-mir-191b-p3
					PRLR	cja-miR-556_R+1
					PRLR	hsa-miR-10a-5p_R-1
					PRLR	hsa-miR-10b-5p_R-1
					PRLR	hsa-miR-124-3p_R-2
					PRLR	hsa-miR-181c-5p_R+1
					PRLR	hsa-miR-197-5p
					PRLR	hsa-miR-3140-5p
					PRLR	hsa-miR-320a-3p
					PRLR	hsa-miR-320b_R-2
					PRLR	hsa-miR-3620-3p
					PRLR	hsa-miR-365a-3p
					PRLR	hsa-miR-4433b-3p_L+1_1ss9GC
					PRLR	hsa-miR-449a
					PRLR	hsa-miR-4665-5p
					PRLR	hsa-miR-4701-5p_L+1
					PRLR	hsa-miR-5010-3p_R+1
					PRLR	hsa-miR-548q_L+2R-2
					PRLR	hsa-miR-556-5p_R-1
					PRLR	hsa-miR-7704_1ss19GC
					PRLR	hsa-mir-3166-p5
					PRLR	hsa-mir-3202-1-p5
					PRLR	hsa-mir-3202-2-p5
					PRLR	hsa-mir-4440-p5_1ss22CA
					PRLR	mdo-miR-181b-5p_R+3
					IL13RA2	hsa-miR-3187-3p_R+1
					IL13RA2	hsa-miR-4701-5p_L+1
					IL13RA2	hsa-miR-873-3p
					HTRA2	PC-5p-34170_8
					HTRA2	cgr-miR-1260_R+2_1
					HTRA2	cgr-miR-1260_R+2_2
					HTRA2	cgr-miR-1260_R+2_3
					HTRA2	cgr-miR-1260_R+2_4
					HTRA2	cgr-miR-1260_R+2_5
					HTRA2	cgr-miR-1260_R+2_6
					HTRA2	cgr-miR-1285_L-4R-1_1ss15GA
					HTRA2	hsa-miR-1249-5p
					HTRA2	hsa-miR-3065-3p_R-1
					HTRA2	hsa-miR-4433b-3p_L+1_1ss9GC
					HTRA2	hsa-miR-4662b
					HTRA2	hsa-miR-4665-5p
					HTRA2	hsa-miR-4687-5p_R-1
					HTRA2	hsa-miR-5010-5p
					HTRA2	hsa-miR-5586-5p
					HTRA2	hsa-miR-6515-5p
					HTRA2	hsa-miR-766-5p_R+1
					HTRA2	hsa-miR-876-3p_R-2
					HTRA2	hsa-mir-7851-p5_1ss12TG
					HTRA2	mmu-mir-6240-p3_1ss19GT
					HTRA2	mmu-mir-6240-p5_1ss19GT
					HTRA2	pal-miR-9995-3p_1ss1AG
					HTRA2	ssc-mir-150-1-p3_1ss1TA
					PIK3R3	PC-3p-18565_22
					PIK3R3	PC-3p-26513_12
					PIK3R3	PC-3p-43265_5
					PIK3R3	PC-3p-45328_5
					PIK3R3	PC-3p-48441_5
					PIK3R3	PC-5p-25681_13
					PIK3R3	PC-5p-34170_8
					PIK3R3	PC-5p-46446_5
					PIK3R3	bta-miR-150
					PIK3R3	bta-miR-185_L+1_1ss23AT
					PIK3R3	bta-miR-2285bm_1ss14GA
					PIK3R3	bta-miR-2424_L-3
					PIK3R3	bta-miR-339a_R+2
					PIK3R3	bta-miR-339a_R+3
					PIK3R3	bta-miR-378_L+1R+1
					PIK3R3	bta-mir-677-p3
					PIK3R3	cgr-miR-1285_L-4R-1_1ss15GA
					PIK3R3	chi-miR-16b-5p
					PIK3R3	cja-mir-9954-p5_1ss7GC
					PIK3R3	ggo-mir-1291-p3
					PIK3R3	hsa-miR-1-3p
					PIK3R3	hsa-miR-103a-1-5p
					PIK3R3	hsa-miR-103a-2-5p_R+1
					PIK3R3	hsa-miR-1249-5p
					PIK3R3	hsa-miR-146a-3p_L+1R-2
					PIK3R3	hsa-miR-148b-3p
					PIK3R3	hsa-miR-181c-5p_R+1
					PIK3R3	hsa-miR-188-3p
					PIK3R3	hsa-miR-2110_R+1
					PIK3R3	hsa-miR-214-3p
					PIK3R3	hsa-miR-29b-1-5p
					PIK3R3	hsa-miR-30d-3p
					PIK3R3	hsa-miR-335-3p
					PIK3R3	hsa-miR-335-5p
					PIK3R3	hsa-miR-3614-3p_R-1
					PIK3R3	hsa-miR-363-3p_R+1
					PIK3R3	hsa-miR-365a-3p
					PIK3R3	hsa-miR-3677-3p
					PIK3R3	hsa-miR-377-5p
					PIK3R3	hsa-miR-432-5p_1ss23GT
					PIK3R3	hsa-miR-4521_R+4
					PIK3R3	hsa-miR-4659b-3p_L+1R-1
					PIK3R3	hsa-miR-4662b
					PIK3R3	hsa-miR-4676-3p_R-1
					PIK3R3	hsa-miR-4701-5p_L+1
					PIK3R3	hsa-miR-497-5p
					PIK3R3	hsa-miR-5006-3p_R+1
					PIK3R3	hsa-miR-504-5p
					PIK3R3	hsa-miR-539-3p
					PIK3R3	hsa-miR-548q_L+2R-2
					PIK3R3	hsa-miR-642a-3p_R-1_1ss21CT
					PIK3R3	hsa-miR-6511a-3p_R+1
					PIK3R3	hsa-miR-6718-5p_R+1
					PIK3R3	hsa-miR-7109-3p_R+1
					PIK3R3	hsa-mir-3135b-p3_1ss17CG
					PIK3R3	hsa-mir-4440-p5_1ss22CA
					PIK3R3	hsa-mir-548ax-p3
					PIK3R3	hsa-mir-548y-p3_1ss1CT
					PIK3R3	hsa-mir-641-p3
					PIK3R3	mdo-miR-106-5p_R+2_1ss1AT
					PIK3R3	mdo-miR-181b-5p_R+3
					PIK3R3	mdo-miR-26-5p_L+1R+1
					PIK3R3	mmu-mir-6236-p3_1
					PIK3R3	mmu-mir-6240-p3_1ss19GT
					PIK3R3	mmu-mir-6240-p5_1ss19GT
					PIK3R3	mmu-mir-6240-p5_1ss22GT
					PIK3R3	mmu-mir-6240-p5_2ss1GN23GT
					PIK3R3	pal-miR-339b-5p_R+1
					PIK3R3	ptr-mir-4667-p3_1ss22GT
					LIFR	PC-3p-32214_9
					LIFR	PC-3p-36064_7
					LIFR	PC-3p-38005_6
					LIFR	PC-3p-42970_5
					LIFR	PC-3p-50140_5
					LIFR	PC-5p-19713_20
					LIFR	PC-5p-33957_8
					LIFR	PC-5p-43132_5
					LIFR	PC-5p-48552_5
					LIFR	PC-5p-6864_91
					LIFR	bta-miR-150
					LIFR	bta-miR-185_L+1_1ss23AT
					LIFR	bta-miR-6119-5p
					LIFR	bta-mir-191b-p3
					LIFR	bta-mir-677-p3
					LIFR	chi-miR-3432-5p
					LIFR	cja-miR-556_R+1
					LIFR	cja-miR-9933_L-5_1ss12AT
					LIFR	cja-miR-9983_L-1R+1
					LIFR	dno-miR-134-5p_R+1_1ss22CT
					LIFR	eca-mir-1543-p3_1ss1GA
					LIFR	hsa-miR-1-3p
					LIFR	hsa-miR-103a-1-5p
					LIFR	hsa-miR-103a-2-5p_R+1
					LIFR	hsa-miR-1185-1-3p
					LIFR	hsa-miR-1185-2-3p
					LIFR	hsa-miR-1185-5p_R+1
					LIFR	hsa-miR-125a-5p
					LIFR	hsa-miR-125b-5p
					LIFR	hsa-miR-1294
					LIFR	hsa-miR-1296-5p
					LIFR	hsa-miR-1303_L+1
					LIFR	hsa-miR-1306-5p_R-1
					LIFR	hsa-miR-133a-5p
					LIFR	hsa-miR-1343-3p
					LIFR	hsa-miR-135a-3p_L+1_1ss23GA
					LIFR	hsa-miR-181c-5p_R+1
					LIFR	hsa-miR-188-3p
					LIFR	hsa-miR-192-5p
					LIFR	hsa-miR-203a-3p_R+1
					LIFR	hsa-miR-211-5p
					LIFR	hsa-miR-2110_R+1
					LIFR	hsa-miR-214-3p
					LIFR	hsa-miR-219b-3p
					LIFR	hsa-miR-27a-3p
					LIFR	hsa-miR-27b-3p
					LIFR	hsa-miR-299-3p
					LIFR	hsa-miR-30c-2-3p
					LIFR	hsa-miR-30d-3p
					LIFR	hsa-miR-3130-3p
					LIFR	hsa-miR-3136-5p
					LIFR	hsa-miR-3140-3p_R-1
					LIFR	hsa-miR-3187-3p_R+1
					LIFR	hsa-miR-320a-3p
					LIFR	hsa-miR-320b_R-2
					LIFR	hsa-miR-323a-3p
					LIFR	hsa-miR-335-3p
					LIFR	hsa-miR-3679-5p_R-2
					LIFR	hsa-miR-374a-5p_R-1
					LIFR	hsa-miR-376b-5p_L-1R+1
					LIFR	hsa-miR-376c-5p_L-1R+2
					LIFR	hsa-miR-377-3p
					LIFR	hsa-miR-377-5p
					LIFR	hsa-miR-378g_R+1
					LIFR	hsa-miR-381-3p
					LIFR	hsa-miR-431-5p_R-1
					LIFR	hsa-miR-4422_R+1
					LIFR	hsa-miR-4659a-3p
					LIFR	hsa-miR-4659b-3p_L+1R-1
					LIFR	hsa-miR-4662b
					LIFR	hsa-miR-4676-3p_R-1
					LIFR	hsa-miR-4701-5p_L+1
					LIFR	hsa-miR-4775
					LIFR	hsa-miR-485-3p
					LIFR	hsa-miR-494-3p_R+1
					LIFR	hsa-miR-495-3p
					LIFR	hsa-miR-501-5p_R+2
					LIFR	hsa-miR-5010-3p_R+1
					LIFR	hsa-miR-539-3p
					LIFR	hsa-miR-539-5p_R+1
					LIFR	hsa-miR-543_R+1
					LIFR	hsa-miR-548ab
					LIFR	hsa-miR-548ag_1ss4GA
					LIFR	hsa-miR-548aq-5p
					LIFR	hsa-miR-548au-5p_R+1
					LIFR	hsa-miR-548ba
					LIFR	hsa-miR-548q_L+2R-2
					LIFR	hsa-miR-550a-3p
					LIFR	hsa-miR-556-5p_R-1
					LIFR	hsa-miR-5690_R+1
					LIFR	hsa-miR-5695_L-1R+1
					LIFR	hsa-miR-619-5p_1ss1GA
					LIFR	hsa-miR-624-3p
					LIFR	hsa-miR-629-3p
					LIFR	hsa-miR-643_L+2R-3
					LIFR	hsa-miR-6505-5p
					LIFR	hsa-miR-6511a-3p_R+1
					LIFR	hsa-miR-654-5p
					LIFR	hsa-miR-6859-5p
					LIFR	hsa-miR-873-5p_L+1R-3
					LIFR	hsa-miR-874-5p
					LIFR	hsa-miR-943_L+1R+1
					LIFR	hsa-miR-9985_R-1_1ss16CT
					LIFR	hsa-mir-1255a-p3
					LIFR	hsa-mir-3133-p3
					LIFR	hsa-mir-451a-p3
					LIFR	hsa-mir-4781-p3
					LIFR	hsa-mir-548ax-p3
					LIFR	hsa-mir-548y-p3_1ss1CT
					LIFR	mdo-miR-106-5p_R+2_1ss1AT
					LIFR	mdo-miR-181b-5p_R+3
					LIFR	mdo-miR-26-5p_L+1R+1
					LIFR	mdo-miR-26-5p_R+3
					LIFR	mmr-miR-374a_R+4
					LIFR	mmu-miR-351-5p_R-2
					LIFR	mmu-miR-3964_L+1R+1_1ss6GA
					LIFR	mmu-miR-497b_L-1
					LIFR	pal-miR-9298-5p_R-5
					LIFR	pal-mir-9298-p3_1ss1CG
					LIFR	ppy-mir-1268-p3_1ss11TC
					LIFR	ptr-mir-4667-p3_1ss22GT
					LIFR	sha-miR-125a_R+2
					LIFR	ssc-miR-451_L+4R-2
					LIFR	ssc-mir-1285-p5_1ss18TC
					IL7	PC-3p-48481_5
					IL7	PC-5p-48552_5
					IL7	bta-miR-150
					IL7	hsa-miR-10395-3p
					IL7	hsa-miR-1185-1-3p
					IL7	hsa-miR-1185-2-3p
					IL7	hsa-miR-1229-3p
					IL7	hsa-miR-124-3p_R-2
					IL7	hsa-miR-1246
					IL7	hsa-miR-203a-3p_R+1
					IL7	hsa-miR-3157-3p
					IL7	hsa-miR-365a-3p
					IL7	hsa-miR-379-3p_R-1
					IL7	hsa-miR-411-3p_R-1
					IL7	hsa-miR-432-5p_1ss23GT
					IL7	hsa-miR-4804-5p_L+1R-1_1ss7CG
					IL7	hsa-miR-539-5p_R+1
					IL7	hsa-miR-548ab
					IL7	hsa-miR-548au-5p_R+1
					IL7	hsa-miR-548ba
					IL7	hsa-miR-550a-3p
					IL7	hsa-miR-6515-5p
					IL7	hsa-miR-655-3p
					IL7	hsa-miR-7705_R-1
					IL7	mdo-miR-181b-5p_R+3
					IL7	mmu-miR-101c_L+1R+2
					IL7	ssc-mir-150-1-p3_1ss1TA
					PIK3CA	PC-3p-26180_13
					PIK3CA	PC-3p-26513_12
					PIK3CA	PC-3p-32214_9
					PIK3CA	PC-3p-36064_7
					PIK3CA	PC-3p-37309_7
					PIK3CA	PC-3p-48481_5
					PIK3CA	PC-3p-9143_61
					PIK3CA	PC-5p-31749_9
					PIK3CA	PC-5p-43610_5
					PIK3CA	PC-5p-43617_5
					PIK3CA	bta-miR-154c
					PIK3CA	bta-miR-185_L+1_1ss23AT
					PIK3CA	bta-miR-199c_L-1R+3
					PIK3CA	bta-miR-2285bm_1ss14GA
					PIK3CA	bta-miR-378_R+1_1ss22CT
					PIK3CA	bta-mir-1246-p5_1ss18GA
					PIK3CA	bta-mir-677-p3
					PIK3CA	cfa-miR-429
					PIK3CA	cgr-miR-532-5p_R+2_1
					PIK3CA	cgr-miR-532-5p_R+2_2
					PIK3CA	chi-miR-3955-5p_1ss12AT
					PIK3CA	cja-miR-548r_R+2_1ss9TG
					PIK3CA	dno-miR-134-5p_R+1_1ss22CT
					PIK3CA	hsa-let-7e-5p
					PIK3CA	hsa-miR-10395-3p
					PIK3CA	hsa-miR-10a-5p_R-1
					PIK3CA	hsa-miR-10b-5p_R-1
					PIK3CA	hsa-miR-1197
					PIK3CA	hsa-miR-1228-3p
					PIK3CA	hsa-miR-1246
					PIK3CA	hsa-miR-125a-3p_R-1
					PIK3CA	hsa-miR-125b-2-3p_L-2R+1
					PIK3CA	hsa-miR-1270
					PIK3CA	hsa-miR-1271-5p
					PIK3CA	hsa-miR-1273h-3p
					PIK3CA	hsa-miR-1299
					PIK3CA	hsa-miR-1303_L+1
					PIK3CA	hsa-miR-134-5p
					PIK3CA	hsa-miR-136-5p_R-1
					PIK3CA	hsa-miR-145-3p_L-2R+1
					PIK3CA	hsa-miR-148b-3p
					PIK3CA	hsa-miR-1537-5p
					PIK3CA	hsa-miR-181b-2-3p
					PIK3CA	hsa-miR-183-5p
					PIK3CA	hsa-miR-203a-3p_R+1
					PIK3CA	hsa-miR-26b-3p_R+1
					PIK3CA	hsa-miR-27a-3p
					PIK3CA	hsa-miR-27b-3p
					PIK3CA	hsa-miR-29b-2-5p_R+1
					PIK3CA	hsa-miR-3143_R-3
					PIK3CA	hsa-miR-320a-3p
					PIK3CA	hsa-miR-320b_R-2
					PIK3CA	hsa-miR-329-3p
					PIK3CA	hsa-miR-33a-3p_R-1
					PIK3CA	hsa-miR-3614-3p_R-1
					PIK3CA	hsa-miR-3690
					PIK3CA	hsa-miR-374a-5p_R-1
					PIK3CA	hsa-miR-378g_R+1
					PIK3CA	hsa-miR-382-3p_R+1
					PIK3CA	hsa-miR-382-5p
					PIK3CA	hsa-miR-3928-3p
					PIK3CA	hsa-miR-4446-5p_R+1
					PIK3CA	hsa-miR-4654_R+2
					PIK3CA	hsa-miR-4659a-3p
					PIK3CA	hsa-miR-4659b-3p_L+1R-1
					PIK3CA	hsa-miR-4662a-3p
					PIK3CA	hsa-miR-4676-3p_R-1
					PIK3CA	hsa-miR-4676-5p_R+1
					PIK3CA	hsa-miR-4775
					PIK3CA	hsa-miR-494-3p_R+1
					PIK3CA	hsa-miR-5001-3p_R+1
					PIK3CA	hsa-miR-5006-3p_R+1
					PIK3CA	hsa-miR-501-5p_R+2
					PIK3CA	hsa-miR-5189-3p
					PIK3CA	hsa-miR-5193
					PIK3CA	hsa-miR-539-5p_R+1
					PIK3CA	hsa-miR-548b-3p_R-2
					PIK3CA	hsa-miR-548ba
					PIK3CA	hsa-miR-550a-3-5p_R+1
					PIK3CA	hsa-miR-561-5p
					PIK3CA	hsa-miR-577_L+1
					PIK3CA	hsa-miR-6505-5p
					PIK3CA	hsa-miR-6859-5p
					PIK3CA	hsa-miR-758-3p
					PIK3CA	hsa-miR-876-3p_R-2
					PIK3CA	hsa-miR-93-3p_R+1
					PIK3CA	hsa-miR-9985_R-1_1ss16CT
					PIK3CA	hsa-mir-4781-p3
					PIK3CA	hsa-mir-548ax-p3
					PIK3CA	hsa-mir-548y-p3_1ss1CT
					PIK3CA	mml-miR-378d_R-1_1ss21CT
					PIK3CA	mmr-miR-374a_R+4
					PIK3CA	mmu-let-7c-5p_R+2
					PIK3CA	mmu-miR-3964_L+1R+1_1ss6GA
					PIK3CA	mmu-mir-6236-p3_3
					PIK3CA	mmu-mir-6240-p3_1ss21GT
					PIK3CA	mmu-mir-6240-p5_1ss22GT
					PIK3CA	mmu-mir-6240-p5_2ss1GN23GT
					PIK3CA	mmu-mir-7650-p5_1ss16CT
					PIK3CA	ppy-miR-378d_R+2
					PIK3CA	ssc-miR-451_L+4R-2
					PIK3CA	ssc-mir-1285-p5_1ss18TC
					STAT3	PC-3p-18565_22
					STAT3	PC-5p-33957_8
					STAT3	PC-5p-48552_5
					STAT3	cja-miR-9983_L-1R+1
					STAT3	cja-mir-9954-p5_1ss7GC
					STAT3	hsa-miR-10a-5p_R-1
					STAT3	hsa-miR-10b-5p_R-1
					STAT3	hsa-miR-1229-3p
					STAT3	hsa-miR-125a-5p
					STAT3	hsa-miR-125b-5p
					STAT3	hsa-miR-1299
					STAT3	hsa-miR-146a-3p_L+1R-2
					STAT3	hsa-miR-186-3p_R-4
					STAT3	hsa-miR-26b-3p_R+1
					STAT3	hsa-miR-301b-3p
					STAT3	hsa-miR-31-3p_R+1
					STAT3	hsa-miR-3173-5p
					STAT3	hsa-miR-320a-3p
					STAT3	hsa-miR-320b_R-2
					STAT3	hsa-miR-323b-3p_R-1
					STAT3	hsa-miR-337-3p_L-1
					STAT3	hsa-miR-371b-3p
					STAT3	hsa-miR-4433b-3p_L+1_1ss9GC
					STAT3	hsa-miR-4662a-3p
					STAT3	hsa-miR-485-5p_R+1
					STAT3	hsa-miR-495-3p
					STAT3	hsa-miR-504-5p
					STAT3	hsa-miR-548b-3p_R-2
					STAT3	hsa-miR-577_L+1
					STAT3	hsa-miR-619-5p_1ss1GA
					STAT3	hsa-miR-629-3p
					STAT3	hsa-miR-642a-3p_R-1_1ss21CT
					STAT3	hsa-miR-643_L+2R-3
					STAT3	hsa-miR-6501-5p_R+1
					STAT3	hsa-miR-6511a-3p_R+1
					STAT3	hsa-miR-6799-3p_R-1
					STAT3	hsa-miR-874-3p
					STAT3	hsa-miR-876-3p_R-2
					STAT3	hsa-miR-93-3p_R+1
					STAT3	hsa-mir-1255a-p3
					STAT3	hsa-mir-1273c-p3_1ss24GT
					STAT3	mdo-miR-106-5p_R+2_1ss1AT
					STAT3	mmu-miR-351-5p_R-2
					STAT3	mmu-mir-6240-p3_1ss19GT
					STAT3	mmu-mir-6240-p5_1ss19GT
					STAT3	pal-miR-9298-5p_R-5
					STAT3	pal-mir-9298-p3_1ss1CG
					STAT3	ppy-miR-1976_L+1R+1
					STAT3	ppy-mir-1268-p3_1ss11TC
					STAT3	sha-miR-125a_R+2
					EGFR	PC-3p-18565_22
					EGFR	PC-3p-36064_7
					EGFR	PC-3p-42970_5
					EGFR	PC-3p-48481_5
					EGFR	PC-5p-12507_39
					EGFR	PC-5p-25632_13
					EGFR	PC-5p-38995_6
					EGFR	PC-5p-41424_6
					EGFR	PC-5p-43610_5
					EGFR	PC-5p-48278_5
					EGFR	PC-5p-6863_91
					EGFR	bta-mir-191b-p3
					EGFR	bta-mir-677-p3
					EGFR	cfa-miR-429
					EGFR	chi-miR-16b-5p
					EGFR	chi-miR-3955-5p_1ss12AT
					EGFR	cja-miR-548r_R+2_1ss9TG
					EGFR	cja-miR-9933_L-5_1ss12AT
					EGFR	dno-miR-134-5p_R+1_1ss22CT
					EGFR	hsa-let-7g-3p_R+1
					EGFR	hsa-miR-1-3p
					EGFR	hsa-miR-103a-1-5p
					EGFR	hsa-miR-103a-2-5p_R+1
					EGFR	hsa-miR-103a-3p
					EGFR	hsa-miR-1197
					EGFR	hsa-miR-1234-3p_R+1
					EGFR	hsa-miR-1249-5p
					EGFR	hsa-miR-1250-5p
					EGFR	hsa-miR-125a-3p_R-1
					EGFR	hsa-miR-125b-2-3p_L-2R+1
					EGFR	hsa-miR-127-5p_R+1
					EGFR	hsa-miR-1294
					EGFR	hsa-miR-1299
					EGFR	hsa-miR-1306-5p_R-1
					EGFR	hsa-miR-133a-3p_R+1
					EGFR	hsa-miR-134-5p
					EGFR	hsa-miR-1343-3p
					EGFR	hsa-miR-141-3p_R-1
					EGFR	hsa-miR-145-3p_L-2R+1
					EGFR	hsa-miR-146a-3p_L+1R-2
					EGFR	hsa-miR-146a-5p
					EGFR	hsa-miR-146b-5p_R-1
					EGFR	hsa-miR-19b-1-5p
					EGFR	hsa-miR-200a-3p_R+1
					EGFR	hsa-miR-2355-5p_R+1
					EGFR	hsa-miR-27a-3p
					EGFR	hsa-miR-27b-3p
					EGFR	hsa-miR-29b-2-5p_R+1
					EGFR	hsa-miR-30d-3p
					EGFR	hsa-miR-3136-5p
					EGFR	hsa-miR-3140-3p_R-1
					EGFR	hsa-miR-3140-5p
					EGFR	hsa-miR-320a-3p
					EGFR	hsa-miR-320b_R-2
					EGFR	hsa-miR-335-3p
					EGFR	hsa-miR-33a-3p_R-1
					EGFR	hsa-miR-3690
					EGFR	hsa-miR-377-5p
					EGFR	hsa-miR-378g_R+1
					EGFR	hsa-miR-379-3p_R-1
					EGFR	hsa-miR-411-3p_R-1
					EGFR	hsa-miR-411-5p
					EGFR	hsa-miR-424-3p
					EGFR	hsa-miR-432-5p_1ss23GT
					EGFR	hsa-miR-4433b-3p_L+1_1ss9GC
					EGFR	hsa-miR-4446-5p_R+1
					EGFR	hsa-miR-4454_L-2
					EGFR	hsa-miR-450a-2-3p_L-1
					EGFR	hsa-miR-4521_R+4
					EGFR	hsa-miR-4654_R+2
					EGFR	hsa-miR-4659a-3p
					EGFR	hsa-miR-4676-3p_R-1
					EGFR	hsa-miR-4766-3p
					EGFR	hsa-miR-4775
					EGFR	hsa-miR-491-5p
					EGFR	hsa-miR-493-5p
					EGFR	hsa-miR-497-5p
					EGFR	hsa-miR-5001-3p_R+1
					EGFR	hsa-miR-5189-5p_L-2
					EGFR	hsa-miR-539-5p_R+1
					EGFR	hsa-miR-548ag_1ss4GA
					EGFR	hsa-miR-548aq-5p
					EGFR	hsa-miR-548ba
					EGFR	hsa-miR-548q_L+2R-2
					EGFR	hsa-miR-5695_L-1R+1
					EGFR	hsa-miR-642a-3p_R-1_1ss21CT
					EGFR	hsa-miR-6503-5p_1ss23AT
					EGFR	hsa-miR-654-5p
					EGFR	hsa-miR-6772-3p
					EGFR	hsa-miR-6818-5p
					EGFR	hsa-miR-6882-5p_R+1
					EGFR	hsa-miR-874-3p
					EGFR	hsa-miR-943_L+1R+1
					EGFR	hsa-miR-9985_R-1_1ss16CT
					EGFR	hsa-mir-10527-p3_1ss9TC
					EGFR	hsa-mir-1273c-p3_1ss24GT
					EGFR	hsa-mir-3166-p5
					EGFR	hsa-mir-4781-p3
					EGFR	hsa-mir-544b-p5_1ss16TG
					EGFR	mdo-miR-106-5p_R+2_1ss1AT
					EGFR	mml-miR-1234_R+3
					EGFR	mmu-miR-101c_L+1R+2
					EGFR	mmu-miR-146a-5p_R+1
					EGFR	mmu-miR-146a-5p_R+1_1ss22TA
					EGFR	mmu-miR-501-3p_R-1
					EGFR	mmu-mir-6236-p3_3
					EGFR	mmu-mir-6240-p3_1ss21GT
					EGFR	mmu-mir-6240-p5_1ss22GT
					EGFR	mmu-mir-6240-p5_2ss1GN23GT
					EGFR	ocu-miR-146b-5p_R-1_1ss23GA
					EGFR	pal-mir-9298-p3_1ss1CG
					NDUFC2	PC-3p-37309_7
					NDUFC2	PC-5p-38995_6
					NDUFC2	cgr-miR-1260_R+2_1
					NDUFC2	cgr-miR-1260_R+2_2
					NDUFC2	cgr-miR-1260_R+2_3
					NDUFC2	cgr-miR-1260_R+2_4
					NDUFC2	cgr-miR-1260_R+2_5
					NDUFC2	cgr-miR-1260_R+2_6
					NDUFC2	cgr-miR-1285_L-4R-1_1ss15GA
					NDUFC2	cja-miR-9983_L-1R+1
					NDUFC2	hsa-miR-103a-3p
					NDUFC2	hsa-miR-1343-3p
					NDUFC2	hsa-miR-18a-3p_1ss23GA
					NDUFC2	hsa-miR-214-3p
					NDUFC2	hsa-miR-219b-3p
					NDUFC2	hsa-miR-3161_R-1
					NDUFC2	hsa-miR-3173-5p
					NDUFC2	hsa-miR-363-3p_R+1
					NDUFC2	hsa-miR-382-3p_R+1
					NDUFC2	hsa-miR-449a
					NDUFC2	hsa-miR-4701-5p_L+1
					NDUFC2	hsa-miR-4738-3p_L-1
					NDUFC2	hsa-miR-485-5p_R+1
					NDUFC2	hsa-miR-493-5p
					NDUFC2	hsa-miR-5000-3p_R-1
					NDUFC2	hsa-miR-576-5p
					NDUFC2	hsa-miR-619-5p_1ss1GA
					NDUFC2	hsa-miR-624-3p
					NDUFC2	hsa-miR-627-5p_1ss2TG
					NDUFC2	hsa-miR-6799-3p_R-1
					NDUFC2	hsa-miR-873-3p
					NDUFC2	hsa-miR-873-5p_L+1R-3
					NDUFC2	hsa-miR-943_L+1R+1
					NDUFC2	hsa-mir-1268a-p3_1ss7GA
					NDUFC2	hsa-mir-641-p3
					NDUFC2	hsa-mir-7851-p5_1ss12TG
					NDUFC2	mmu-mir-6240-p5_2ss1GN23GT
					NDUFC2	mmu-mir-7650-p5_1ss16CT
					NDUFC2	ppy-mir-1268-p3_1ss11TC
					ATP5I	hsa-miR-377-3p
					PRLR	chi-miR-3432-5p
					PRLR	hsa-miR-21-3p
					PRLR	mmu-miR-5124a_L-1R-1_1ss5CA
					BID	PC-3p-36500_7
					BID	bta-mir-191b-p3
					BID	bta-mir-677-p3
					BID	cgr-miR-1285_L-4R-1_1ss15GA
					BID	efu-mir-9298-p3_1ss18CT
					BID	efu-mir-9298-p5_1ss18CT
					BID	hsa-miR-1228-3p
					BID	hsa-miR-124-3p_R-2
					BID	hsa-miR-1255a
					BID	hsa-miR-1298-5p
					BID	hsa-miR-1343-3p
					BID	hsa-miR-145-3p_L-2R+1
					BID	hsa-miR-1537-5p
					BID	hsa-miR-199a-5p
					BID	hsa-miR-199b-5p
					BID	hsa-miR-26b-3p_R+1
					BID	hsa-miR-3140-3p_R-1
					BID	hsa-miR-371b-3p
					BID	hsa-miR-4422_R+1
					BID	hsa-miR-4433b-3p_L+1_1ss9GC
					BID	hsa-miR-4676-5p_R+1
					BID	hsa-miR-495-3p
					BID	hsa-miR-6818-5p
					BID	hsa-mir-641-p3
					BID	mdo-miR-26-5p_L+1R+1
					BID	mdo-miR-26-5p_R+3
					BOK	PC-3p-31135_9
					BOK	PC-5p-33957_8
					BOK	PC-5p-49801_5
					BOK	cgr-miR-1285_L-4R-1_1ss15GA
					BOK	cja-mir-9954-p5_1ss7GC
					BOK	hsa-miR-1255a
					BOK	hsa-miR-125a-3p_R-1
					BOK	hsa-miR-1343-3p
					BOK	hsa-miR-181a-2-3p
					BOK	hsa-miR-221-5p
					BOK	hsa-miR-2355-5p_R+1
					BOK	hsa-miR-328-3p
					BOK	hsa-miR-4654_R+2
					BOK	hsa-miR-504-5p
					BOK	hsa-miR-660-3p_R+1
					BOK	hsa-miR-6886-3p_R+2
					BOK	hsa-miR-766-5p_R+1
					BOK	hsa-miR-7851-3p
					BOK	hsa-miR-874-5p
					BOK	hsa-mir-4440-p5_1ss22CA
					BOK	ptr-mir-4667-p3_1ss22GT
					PIAS2	PC-3p-18565_22
					PIAS2	PC-3p-31135_9
					PIAS2	PC-3p-38005_6
					PIAS2	PC-3p-48441_5
					PIAS2	PC-5p-31749_9
					PIAS2	bta-mir-677-p3
					PIAS2	hsa-miR-1-3p
					PIAS2	hsa-miR-103a-1-5p
					PIAS2	hsa-miR-103a-2-5p_R+1
					PIAS2	hsa-miR-1185-5p_R+1
					PIAS2	hsa-miR-127-5p_R+1
					PIAS2	hsa-miR-1303_L+1
					PIAS2	hsa-miR-141-3p_R-1
					PIAS2	hsa-miR-146a-5p
					PIAS2	hsa-miR-146b-5p_R-1
					PIAS2	hsa-miR-1537-5p
					PIAS2	hsa-miR-181b-2-3p
					PIAS2	hsa-miR-183-5p
					PIAS2	hsa-miR-186-3p_R-4
					PIAS2	hsa-miR-19b-1-5p
					PIAS2	hsa-miR-200a-3p_R+1
					PIAS2	hsa-miR-203a-3p_R+1
					PIAS2	hsa-miR-21-3p
					PIAS2	hsa-miR-219b-3p
					PIAS2	hsa-miR-30c-2-3p
					PIAS2	hsa-miR-30d-3p
					PIAS2	hsa-miR-3143_R-3
					PIAS2	hsa-miR-323b-3p_R-1
					PIAS2	hsa-miR-335-3p
					PIAS2	hsa-miR-335-5p
					PIAS2	hsa-miR-380-5p_L+1R-1
					PIAS2	hsa-miR-381-3p
					PIAS2	hsa-miR-382-3p_R+1
					PIAS2	hsa-miR-4659b-3p_L+1R-1
					PIAS2	hsa-miR-4662a-3p
					PIAS2	hsa-miR-4775
					PIAS2	hsa-miR-4799-5p
					PIAS2	hsa-miR-491-3p
					PIAS2	hsa-miR-495-3p
					PIAS2	hsa-miR-619-5p_1ss1GA
					PIAS2	hsa-miR-6505-5p
					PIAS2	hsa-miR-6837-3p
					PIAS2	hsa-miR-6859-5p
					PIAS2	hsa-miR-758-5p_L-1R+1
					PIAS2	hsa-mir-1285-1-p5_1ss5CT
					PIAS2	mdo-miR-26-5p_L+1R+1
					PIAS2	mdo-miR-26-5p_R+3
					PIAS2	mmu-miR-146a-5p_R+1
					PIAS2	mmu-miR-146a-5p_R+1_1ss22TA
					PIAS2	mmu-miR-3964_L+1R+1_1ss6GA
					PIAS2	mmu-miR-5124a_L-1R-1_1ss5CA
					PIAS2	mmu-mir-6240-p5_2ss1GN23GT
					PIAS2	ocu-miR-146b-5p_R-1_1ss23GA
					PIAS2	pal-miR-9993b-3p_1ss1AT
					PIAS2	ppy-mir-1268-p3_1ss11TC
					PIAS2	ssc-mir-1285-p5_1ss18TC
					PIAS2	ssc-mir-4335-p3
					PDGFB	PC-3p-18565_22
					PDGFB	PC-3p-26180_13
					PDGFB	PC-3p-31135_9
					PDGFB	PC-3p-35248_7
					PDGFB	PC-3p-42970_5
					PDGFB	PC-5p-19713_20
					PDGFB	PC-5p-25632_13
					PDGFB	PC-5p-34170_8
					PDGFB	PC-5p-43132_5
					PDGFB	PC-5p-47107_5
					PDGFB	bta-miR-342_R-3
					PDGFB	hsa-miR-11401_R+1
					PDGFB	hsa-miR-139-3p
					PDGFB	hsa-miR-18a-3p_1ss23GA
					PDGFB	hsa-miR-29b-2-5p_R+1
					PDGFB	hsa-miR-329-3p
					PDGFB	hsa-miR-342-3p
					PDGFB	hsa-miR-3928-3p
					PDGFB	hsa-miR-432-5p_1ss23GT
					PDGFB	hsa-miR-4433a-5p_R+2
					PDGFB	hsa-miR-4446-5p_R+1
					PDGFB	hsa-miR-4659a-3p
					PDGFB	hsa-miR-4659b-3p_L+1R-1
					PDGFB	hsa-miR-4662b
					PDGFB	hsa-miR-4701-5p_L+1
					PDGFB	hsa-miR-4802-5p
					PDGFB	hsa-miR-487a-5p
					PDGFB	hsa-miR-491-5p
					PDGFB	hsa-miR-5000-3p_R-1
					PDGFB	hsa-miR-5006-3p_R+1
					PDGFB	hsa-miR-545-3p
					PDGFB	hsa-miR-627-5p_1ss2TG
					PDGFB	hsa-miR-6505-5p
					PDGFB	hsa-miR-6515-5p
					PDGFB	hsa-miR-6818-5p
					PDGFB	hsa-miR-7110-3p
					PDGFB	mmu-mir-6240-p3_1ss19GT
					PDGFB	mmu-mir-6240-p5_1ss19GT
					PDGFB	ptr-mir-4667-p3_1ss22GT
					ATP5C1	PC-3p-26180_13
					ATP5C1	hsa-miR-382-5p
					ATP5C1	hsa-miR-3928-3p
					ATP5C1	hsa-miR-4659b-3p_L+1R-1
					ATP5C1	hsa-miR-4802-5p
					ATP5C1	hsa-miR-766-5p_R+1
					ATP5C1	mmu-mir-6236-p3_3
					BID	PC-5p-25681_13
					BID	dno-miR-134-5p_R+1_1ss22CT
					BID	hsa-miR-1299
					BID	hsa-miR-134-5p
					BID	hsa-miR-193a-3p
					BID	hsa-miR-3065-3p_R-1
					BID	hsa-miR-5193
					BID	hsa-miR-548q_L+2R-2
					EGFR	PC-5p-43617_5
					EGFR	hsa-miR-30c-2-3p
					EGFR	hsa-mir-3202-1-p5
					EGFR	hsa-mir-3202-2-p5
					EGFR	PC-3p-32105_9
					EGFR	PC-5p-34170_8
					EGFR	cja-miR-151_R+1
					EGFR	hsa-miR-1292-5p_R+1
					EGFR	hsa-miR-151a-5p
					EGFR	hsa-miR-151b_R+2
					EGFR	hsa-miR-188-3p
					EGFR	hsa-miR-375-3p
					EGFR	hsa-miR-4433a-5p_R+2
					EGFR	hsa-miR-4676-5p_R+1
					EGFR	hsa-miR-545-3p
					EGFR	hsa-miR-876-3p_R-2
					EGFR	hsa-mir-3133-p3
					EGFR	hsa-mir-4440-p5_1ss22CA
					EGFR	oga-miR-28b_R+3
					IL23R	PC-3p-18565_22
					IL23R	PC-3p-50140_5
					IL23R	PC-3p-930_1380
					IL23R	PC-5p-6864_91
					IL23R	bta-miR-150
					IL23R	hsa-miR-125a-3p_R-1
					IL23R	hsa-miR-1299
					IL23R	hsa-miR-145-3p_L-2R+1
					IL23R	hsa-miR-148b-3p
					IL23R	hsa-miR-19b-1-5p
					IL23R	hsa-miR-3187-3p_R+1
					IL23R	hsa-miR-335-3p
					IL23R	hsa-miR-4701-5p_L+1
					IL23R	hsa-miR-494-3p_R+1
					IL23R	hsa-miR-5001-3p_R+1
					IL23R	hsa-miR-550a-3-5p_R+1
					IL23R	hsa-miR-619-5p_1ss1GA
					IL23R	hsa-miR-6818-5p
					IL23R	hsa-miR-6859-5p
					IL23R	hsa-mir-650-p3_1ss20CG
					IL23R	mmu-miR-5124a_L-1R-1_1ss5CA
					IL23R	ppy-miR-1976_L+1R+1
					NDUFB6	hsa-miR-495-3p
					STAT1	PC-3p-48481_5
					STAT1	bta-miR-199c_L-1R+3
					STAT1	bta-mir-191b-p3
					STAT1	bta-mir-677-p3
					STAT1	cgr-miR-532-5p_R+2_1
					STAT1	cgr-miR-532-5p_R+2_2
					STAT1	cja-miR-548r_R+2_1ss9TG
					STAT1	efu-mir-9298-p3_1ss18CT
					STAT1	efu-mir-9298-p5_1ss18CT
					STAT1	hsa-miR-10395-3p
					STAT1	hsa-miR-1249-5p
					STAT1	hsa-miR-1299
					STAT1	hsa-miR-1303_L+1
					STAT1	hsa-miR-146b-5p_R-1
					STAT1	hsa-miR-181a-2-3p
					STAT1	hsa-miR-186-3p_R-4
					STAT1	hsa-miR-188-3p
					STAT1	hsa-miR-30c-2-3p
					STAT1	hsa-miR-3161_R-1
					STAT1	hsa-miR-382-5p
					STAT1	hsa-miR-409-3p
					STAT1	hsa-miR-4446-5p_R+1
					STAT1	hsa-miR-4775
					STAT1	hsa-miR-494-3p_R+1
					STAT1	hsa-miR-495-3p
					STAT1	hsa-miR-5010-3p_R+1
					STAT1	hsa-miR-548ab
					STAT1	hsa-miR-548ag_1ss4GA
					STAT1	hsa-miR-548aq-5p
					STAT1	hsa-miR-548au-5p_R+1
					STAT1	hsa-miR-548b-3p_R-2
					STAT1	hsa-miR-548ba
					STAT1	hsa-miR-629-3p
					STAT1	hsa-miR-643_L+2R-3
					STAT1	hsa-miR-655-3p
					STAT1	hsa-miR-6886-3p_R+2
					STAT1	hsa-mir-3133-p3
					STAT1	mdo-miR-26-5p_L+1R+1
					STAT1	mmu-mir-6240-p5_2ss1GN23GT
					STAT1	ocu-miR-146b-5p_R-1_1ss23GA
					STAT1	pal-miR-9298-5p_R-5
					NDUFB6	bta-miR-154c
					NDUFB6	hsa-miR-125b-2-3p_L-2R+1
					NDUFB6	hsa-miR-379-3p_R-1
					NDUFB6	hsa-miR-411-3p_R-1
					NDUFB6	mmu-mir-101c-p5_1ss18CT
					IL13RA2	hsa-miR-543_R+1
					PRF1	PC-3p-43265_5
					PRF1	PC-5p-43617_5
					PRF1	PC-5p-6863_91
					PRF1	cja-miR-556_R+1
					PRF1	dno-miR-134-5p_R+1_1ss22CT
					PRF1	hsa-miR-1306-5p_R-1
					PRF1	hsa-miR-134-5p
					PRF1	hsa-miR-1343-3p
					PRF1	hsa-miR-211-5p
					PRF1	hsa-miR-25-5p_R+2
					PRF1	hsa-miR-328-3p
					PRF1	hsa-miR-4677-3p
					PRF1	hsa-miR-5000-3p_R-1
					PRF1	hsa-miR-556-5p_R-1
					PRF1	mmu-miR-351-5p_R-2
					PRF1	mmu-mir-6240-p3_1ss19GT
					PRF1	mmu-mir-6240-p5_1ss19GT
					PRF1	ssc-mir-150-1-p3_1ss1TA
					NDUFB6	PC-3p-18565_22
					NDUFB6	PC-5p-48552_5
					NDUFB6	PC-5p-6864_91
					NDUFB6	cja-mir-9954-p5_1ss7GC
					NDUFB6	hsa-miR-186-3p_R-4
					NDUFB6	hsa-miR-219b-3p
					NDUFB6	hsa-miR-26b-3p_R+1
					NDUFB6	hsa-miR-431-5p_R-1
					NDUFB6	hsa-miR-501-5p_R+2
					NDUFB6	hsa-miR-619-5p_1ss1GA
					NDUFB6	hsa-miR-627-5p_1ss2TG
					NDUFB6	hsa-miR-6505-5p
					NDUFB6	hsa-miR-92b-5p_R+2
					NDUFB6	hsa-mir-451a-p3
					NDUFB6	mdo-miR-106-5p_R+2_1ss1AT
					STAT1	hsa-miR-4766-3p
					STAT1	hsa-miR-542-5p
					STAT1	hsa-miR-874-5p
					STAT1	hsa-mir-4440-p5_1ss22CA
					STAT1	pal-mir-9298-p3_1ss1CG
					PRLR	PC-3p-36064_7
					PRLR	PC-3p-42970_5
					PRLR	PC-3p-43741_5
					PRLR	PC-5p-48552_5
					PRLR	bta-miR-378_L+1R+1
					PRLR	bta-miR-378_R+1_1ss22CT
					PRLR	hsa-miR-1256_R-1
					PRLR	hsa-miR-29b-1-5p
					PRLR	hsa-miR-3690
					PRLR	hsa-miR-409-3p
					PRLR	hsa-miR-433-3p
					PRLR	hsa-miR-4802-5p
					PRLR	hsa-miR-485-3p
					PRLR	hsa-miR-490-3p_R+1
					PRLR	hsa-miR-539-3p
					PRLR	hsa-miR-624-3p
					PRLR	mml-miR-378d_R-1_1ss21CT
					PRLR	mmu-mir-6240-p3_1ss19GT
					PRLR	mmu-mir-6240-p5_1ss19GT
					PRLR	mmu-mir-6240-p5_2ss1GN23GT
					PRLR	ppy-miR-378d_R+2
					PRLR	ssc-mir-150-1-p3_1ss1TA
					SOCS6	PC-3p-26513_12
					SOCS6	PC-3p-32214_9
					SOCS6	PC-3p-48441_5
					SOCS6	PC-3p-9143_61
					SOCS6	PC-5p-41430_6
					SOCS6	PC-5p-46446_5
					SOCS6	bta-miR-378_L+1R+1
					SOCS6	bta-miR-378_R+1_1ss22CT
					SOCS6	cfa-miR-429
					SOCS6	cgr-miR-1260_R+2_1
					SOCS6	cgr-miR-1260_R+2_2
					SOCS6	cgr-miR-1260_R+2_3
					SOCS6	cgr-miR-1260_R+2_4
					SOCS6	cgr-miR-1260_R+2_5
					SOCS6	cgr-miR-1260_R+2_6
					SOCS6	chi-miR-16b-5p
					SOCS6	chi-miR-3955-5p_1ss12AT
					SOCS6	cja-miR-548r_R+2_1ss9TG
					SOCS6	ggo-mir-1291-p3
					SOCS6	hsa-miR-1228-3p
					SOCS6	hsa-miR-1256_R-1
					SOCS6	hsa-miR-1298-5p
					SOCS6	hsa-miR-133a-5p
					SOCS6	hsa-miR-141-3p_R-1
					SOCS6	hsa-miR-183-5p
					SOCS6	hsa-miR-186-3p_R-4
					SOCS6	hsa-miR-192-3p_R+1
					SOCS6	hsa-miR-192-5p
					SOCS6	hsa-miR-19b-1-5p
					SOCS6	hsa-miR-200a-3p_R+1
					SOCS6	hsa-miR-203a-3p_R+1
					SOCS6	hsa-miR-21-3p
					SOCS6	hsa-miR-211-5p
					SOCS6	hsa-miR-219b-3p
					SOCS6	hsa-miR-27a-3p
					SOCS6	hsa-miR-27b-3p
					SOCS6	hsa-miR-299-5p
					SOCS6	hsa-miR-301b-3p
					SOCS6	hsa-miR-30d-3p
					SOCS6	hsa-miR-3136-5p
					SOCS6	hsa-miR-329-3p
					SOCS6	hsa-miR-335-3p
					SOCS6	hsa-miR-3605-3p
					SOCS6	hsa-miR-3614-3p_R-1
					SOCS6	hsa-miR-376b-5p_L-1R+1
					SOCS6	hsa-miR-376c-5p_L-1R+2
					SOCS6	hsa-miR-377-3p
					SOCS6	hsa-miR-382-5p
					SOCS6	hsa-miR-409-3p
					SOCS6	hsa-miR-431-5p_R-1
					SOCS6	hsa-miR-4446-5p_R+1
					SOCS6	hsa-miR-449a
					SOCS6	hsa-miR-4659a-3p
					SOCS6	hsa-miR-4659b-3p_L+1R-1
					SOCS6	hsa-miR-4662b
					SOCS6	hsa-miR-4676-5p_R+1
					SOCS6	hsa-miR-4738-3p_L-1
					SOCS6	hsa-miR-4766-3p
					SOCS6	hsa-miR-494-3p_R+1
					SOCS6	hsa-miR-495-3p
					SOCS6	hsa-miR-497-5p
					SOCS6	hsa-miR-499a-5p
					SOCS6	hsa-miR-5006-3p_R+1
					SOCS6	hsa-miR-545-3p
					SOCS6	hsa-miR-548ab
					SOCS6	hsa-miR-548ag_1ss4GA
					SOCS6	hsa-miR-548au-5p_R+1
					SOCS6	hsa-miR-548b-3p_R-2
					SOCS6	hsa-miR-5586-5p
					SOCS6	hsa-miR-624-3p
					SOCS6	hsa-miR-656-3p
					SOCS6	hsa-miR-7110-3p
					SOCS6	hsa-miR-885-5p
					SOCS6	hsa-miR-9985_R-1_1ss16CT
					SOCS6	hsa-mir-3138-p5
					SOCS6	hsa-mir-4473-p5
					SOCS6	hsa-mir-544b-p5_1ss16TG
					SOCS6	hsa-mir-548y-p3_1ss1CT
					SOCS6	hsa-mir-7851-p5_1ss12TG
					SOCS6	mdo-miR-106-5p_R+2_1ss1AT
					SOCS6	mdo-miR-26-5p_L+1R+1
					SOCS6	mdo-miR-26-5p_R+3
					SOCS6	mml-miR-378d_R-1_1ss21CT
					SOCS6	mmu-mir-6240-p5_1ss22GT
					SOCS6	ppy-miR-378d_R+2
					SOCS6	rno-miR-544-5p_L+1
					SOCS6	ssc-mir-1285-p5_1ss18TC
					PIAS2	PC-5p-33957_8
					PIAS2	PC-5p-38995_6
					PIAS2	PC-5p-46446_5
					PIAS2	PC-5p-6863_91
					PIAS2	bta-miR-339a_R+2
					PIAS2	bta-miR-339a_R+3
					PIAS2	bta-mir-191b-p3
					PIAS2	chi-miR-16b-5p
					PIAS2	cja-miR-9933_L-5_1ss12AT
					PIAS2	hsa-miR-103a-3p
					PIAS2	hsa-miR-1185-1-3p
					PIAS2	hsa-miR-1185-2-3p
					PIAS2	hsa-miR-1271-5p
					PIAS2	hsa-miR-1294
					PIAS2	hsa-miR-1299
					PIAS2	hsa-miR-214-3p
					PIAS2	hsa-miR-221-5p
					PIAS2	hsa-miR-377-3p
					PIAS2	hsa-miR-4659a-3p
					PIAS2	hsa-miR-4766-3p
					PIAS2	hsa-miR-4772-5p
					PIAS2	hsa-miR-490-3p_R+1
					PIAS2	hsa-miR-497-5p
					PIAS2	hsa-miR-5000-3p_R-1
					PIAS2	hsa-miR-5010-3p_R+1
					PIAS2	hsa-miR-5189-5p_L-2
					PIAS2	hsa-miR-548b-3p_R-2
					PIAS2	hsa-miR-548q_L+2R-2
					PIAS2	hsa-miR-561-5p
					PIAS2	hsa-miR-5695_L-1R+1
					PIAS2	hsa-miR-654-5p
					PIAS2	hsa-miR-660-3p_R+1
					PIAS2	hsa-miR-6882-5p_R+1
					PIAS2	hsa-mir-1255a-p3
					PIAS2	mdo-miR-22-3p_R+1
					PIAS2	mmu-miR-101c_L+1R+2
					PIAS2	mmu-mir-6236-p3_2
					PIAS2	mmu-mir-7650-p5_1ss16CT
					PIAS2	pal-miR-339b-5p_R+1
					PIAS2	ppy-miR-1976_L+1R+1
					STAT3	mmu-mir-6240-p5_1ss22GT
					STAT1	cja-miR-556_R+1
					STAT1	hsa-miR-127-5p_R+1
					STAT1	hsa-miR-1306-5p_R-1
					STAT1	hsa-miR-18a-3p_1ss23GA
					STAT1	hsa-miR-203a-3p_R+1
					STAT1	hsa-miR-3130-3p
					STAT1	hsa-miR-4799-5p
					STAT1	hsa-miR-556-5p_R-1
					STAT1	hsa-miR-93-3p_R+1
					STAT1	mdo-miR-26-5p_R+3
					EGFR	hsa-miR-148b-5p_L+1
					EGFR	hsa-miR-7110-3p
					STAT1	PC-5p-6863_91
					STAT1	hsa-miR-320a-3p
					STAT1	hsa-miR-939-5p_R+1
					STAT1	mmu-mir-101c-p5_1ss18CT
					STAT1	PC-3p-31135_9
					STAT1	PC-5p-25632_13
					STAT1	PC-5p-25681_13
					STAT1	PC-5p-47107_5
					STAT1	bta-miR-150
					STAT1	bta-miR-339a_R+2
					STAT1	bta-miR-339a_R+3
					STAT1	bta-miR-769
					STAT1	hsa-miR-1270
					STAT1	hsa-miR-1273h-3p
					STAT1	hsa-miR-1296-5p
					STAT1	hsa-miR-1298-5p
					STAT1	hsa-miR-1343-3p
					STAT1	hsa-miR-148b-5p_L+1
					STAT1	hsa-miR-210-3p
					STAT1	hsa-miR-214-3p
					STAT1	hsa-miR-26b-3p_R+1
					STAT1	hsa-miR-27a-3p
					STAT1	hsa-miR-27b-3p
					STAT1	hsa-miR-382-3p_R+1
					STAT1	hsa-miR-4746-5p
					STAT1	hsa-miR-501-5p_R+2
					STAT1	hsa-miR-9985_R-1_1ss16CT
					STAT1	mmu-miR-3084-3p_R+4_1ss2TG
					STAT1	mmu-mir-6236-p3_3
					STAT1	pal-miR-339b-5p_R+1
					STAT1	ssc-miR-451_L+4R-2
					EGFR	hsa-miR-1298-5p
					EGFR	hsa-miR-365a-3p
					EGFR	hsa-miR-376b-5p_L-1R+1
					EGFR	hsa-miR-376c-5p_L-1R+2
					EGFR	hsa-miR-4659b-3p_L+1R-1
					EGFR	hsa-miR-619-5p_1ss1GA
					EGFR	hsa-miR-6515-5p
					EGFR	hsa-mir-1255a-p3
					EGFR	bta-miR-342_R-3
					EGFR	efu-mir-9298-p3_1ss18CT
					EGFR	efu-mir-9298-p5_1ss18CT
					EGFR	hsa-miR-342-3p
					EGFR	hsa-miR-377-3p
					EGFR	hsa-miR-423-3p
					IL23R	hsa-miR-10395-3p
					IL23R	hsa-miR-146a-5p
					IL23R	hsa-miR-146b-5p_R-1
					IL23R	hsa-miR-199a-5p
					IL23R	hsa-miR-199b-5p
					IL23R	hsa-miR-3140-3p_R-1
					IL23R	hsa-miR-4521_R+4
					IL23R	hsa-miR-4742-3p_L-2R+1
					IL23R	hsa-miR-4772-5p
					IL23R	hsa-miR-490-3p_R+1
					IL23R	hsa-miR-5187-5p
					IL23R	hsa-miR-5193
					IL23R	hsa-miR-5695_L-1R+1
					IL23R	hsa-miR-7851-3p
					IL23R	hsa-miR-876-3p_R-2
					IL23R	hsa-mir-1268a-p3_1ss7GA
					IL23R	hsa-mir-3133-p3
					IL23R	mmu-miR-146a-5p_R+1
					IL23R	mmu-miR-146a-5p_R+1_1ss22TA
					IL23R	ocu-miR-146b-5p_R-1_1ss23GA
					LIFR	PC-3p-930_1380
					LIFR	PC-5p-12507_39
					LIFR	PC-5p-47107_5
					LIFR	hsa-miR-125b-2-3p_L-2R+1
					LIFR	hsa-miR-148b-5p_L+1
					LIFR	hsa-miR-582-5p
					LIFR	hsa-miR-7109-3p_R+1
					LIFR	hsa-miR-7704_1ss19GC
					LIFR	mmu-mir-6240-p5_1ss22GT
					LIFR	mmu-mir-6240-p5_2ss1GN23GT
					PRLR	PC-3p-48441_5
					PRLR	PC-5p-19713_20
					PRLR	bta-miR-199c_L-1R+3
					PRLR	bta-miR-342_R-3
					PRLR	efu-mir-9298-p3_1ss18CT
					PRLR	efu-mir-9298-p5_1ss18CT
					PRLR	hsa-miR-1234-3p_R+1
					PRLR	hsa-miR-1249-5p
					PRLR	hsa-miR-1299
					PRLR	hsa-miR-27a-3p
					PRLR	hsa-miR-27b-3p
					PRLR	hsa-miR-299-3p
					PRLR	hsa-miR-342-3p
					PRLR	hsa-miR-382-3p_R+1
					PRLR	hsa-miR-4326_R+3
					PRLR	hsa-miR-4422_R+1
					PRLR	hsa-miR-4799-5p
					PRLR	hsa-miR-501-5p_R+2
					PRLR	hsa-miR-548aq-5p
					PRLR	hsa-miR-548au-5p_R+1
					PRLR	hsa-miR-6515-5p
					PRLR	hsa-miR-6886-3p_R+2
					PRLR	hsa-miR-7110-3p
					PRLR	hsa-miR-766-5p_R+1
					PRLR	hsa-miR-9985_R-1_1ss16CT
					PRLR	hsa-mir-10527-p3_1ss9TC
					PRLR	hsa-mir-4781-p3
					PRLR	mml-miR-1234_R+3
					PRLR	mmu-miR-501-3p_R-1
					PRLR	pal-miR-9298-5p_R-5
					GHR	PC-5p-3504_231
					GHR	PC-5p-46446_5
					GHR	bta-miR-342_R-3
					GHR	hsa-miR-1256_R-1
					GHR	hsa-miR-1306-5p_R-1
					GHR	hsa-miR-135a-3p_L+1_1ss23GA
					GHR	hsa-miR-1538_R-1
					GHR	hsa-miR-342-3p
					GHR	hsa-miR-3614-5p_R-1
					GHR	hsa-miR-376b-5p_L-1R+1
					GHR	hsa-miR-376c-5p_L-1R+2
					GHR	hsa-miR-378g_R+1
					GHR	hsa-miR-4802-5p
					GHR	hsa-miR-490-3p_R+1
					GHR	hsa-miR-5001-3p_R+1
					GHR	hsa-miR-501-5p_R+2
					GHR	hsa-miR-5193
					GHR	hsa-miR-6818-5p
					GHR	hsa-miR-93-3p_R+1
					GHR	hsa-mir-3138-p5
					GHR	PC-5p-47107_5
					GHR	bta-miR-2285bm_1ss14GA
					GHR	bta-mir-191b-p3
					GHR	hsa-miR-127-5p_R+1
					GHR	hsa-miR-148b-5p_L+1
					GHR	hsa-miR-329-3p
					GHR	hsa-miR-335-5p
					GHR	hsa-miR-576-5p
					GHR	hsa-miR-876-5p_R-1
					GHR	hsa-mir-548ax-p3
					GHR	mdo-miR-26-5p_L+1R+1
					IL7	PC-5p-41424_6
					IL7	chi-miR-16b-5p
					IL7	eca-miR-8986a_L-5R-1_1ss15CA
					IL7	hsa-miR-125b-2-3p_L-2R+1
					IL7	hsa-miR-1270
					IL7	hsa-miR-148b-3p
					IL7	hsa-miR-16-1-3p_R+1
					IL7	hsa-miR-27a-3p
					IL7	hsa-miR-27b-3p
					IL7	hsa-miR-30d-3p
					IL7	hsa-miR-371b-3p
					IL7	hsa-miR-4659a-3p
					IL7	hsa-miR-4659b-3p_L+1R-1
					IL7	hsa-miR-4742-3p_L-2R+1
					IL7	hsa-miR-490-3p_R+1
					IL7	hsa-miR-6882-5p_R+1
					IL7	hsa-miR-9985_R-1_1ss16CT
					IL7	hsa-mir-3166-p5
					IL7	hsa-mir-4473-p5
					IL7	hsa-miR-29b-1-5p
					NDUFC2	hsa-miR-299-3p
					BIRC2	hsa-miR-1185-5p_R+1
					BIRC2	hsa-miR-3679-5p_R-2
					STAT1	PC-5p-19713_20
					STAT1	pal-miR-9993b-3p_1ss1AT
					SOCS6	PC-3p-50140_5
					STAT3	PC-5p-25681_13
					STAT3	PC-5p-41199_6
					STAT3	bta-miR-150
					STAT3	hsa-miR-18a-3p_1ss23GA
					STAT3	hsa-miR-4665-5p
					STAT3	hsa-miR-6511b-3p_L-2R+2
					STAT3	hsa-miR-660-3p_R+1
					STAT3	ptr-mir-4667-p3_1ss22GT
					PIAS2	PC-3p-26513_12
					PIAS2	PC-3p-36500_7
					PIAS2	PC-3p-48481_5
					PIAS2	PC-3p-50140_5
					PIAS2	PC-3p-9143_61
					PIAS2	PC-5p-25681_13
					PIAS2	PC-5p-34170_8
					PIAS2	PC-5p-3504_231
					PIAS2	PC-5p-47107_5
					PIAS2	PC-5p-48552_5
					PIAS2	bta-miR-150
					PIAS2	bta-miR-2285bm_1ss14GA
					PIAS2	bta-miR-3431_L-1R+1
					PIAS2	bta-miR-378_R+1_1ss22CT
					PIAS2	bta-mir-1246-p5_1ss18GA
					PIAS2	cgr-miR-1285_L-4R-1_1ss15GA
					PIAS2	cpo-miR-154-5p_R+1
					PIAS2	eca-miR-8986a_L-5R-1_1ss15CA
					PIAS2	hsa-let-7e-5p
					PIAS2	hsa-miR-1228-3p
					PIAS2	hsa-miR-1229-3p
					PIAS2	hsa-miR-1255a
					PIAS2	hsa-miR-1270
					PIAS2	hsa-miR-129-5p
					PIAS2	hsa-miR-1306-5p_R-1
					PIAS2	hsa-miR-136-5p_R-1
					PIAS2	hsa-miR-146a-3p_L+1R-2
					PIAS2	hsa-miR-148b-3p
					PIAS2	hsa-miR-181c-5p_R+1
					PIAS2	hsa-miR-188-5p
					PIAS2	hsa-miR-18a-3p_1ss23GA
					PIAS2	hsa-miR-193a-3p
					PIAS2	hsa-miR-193b-3p
					PIAS2	hsa-miR-2110_R+1
					PIAS2	hsa-miR-27a-3p
					PIAS2	hsa-miR-27b-3p
					PIAS2	hsa-miR-3065-3p_R-1
					PIAS2	hsa-miR-3157-3p
					PIAS2	hsa-miR-3161_R-1
					PIAS2	hsa-miR-3187-3p_R+1
					PIAS2	hsa-miR-328-3p
					PIAS2	hsa-miR-3679-5p_R-2
					PIAS2	hsa-miR-374c-5p_R-3
					PIAS2	hsa-miR-378g_R+1
					PIAS2	hsa-miR-382-5p
					PIAS2	hsa-miR-424-3p
					PIAS2	hsa-miR-431-5p_R-1
					PIAS2	hsa-miR-4326_R+3
					PIAS2	hsa-miR-4521_R+4
					PIAS2	hsa-miR-4662b
					PIAS2	hsa-miR-4665-5p
					PIAS2	hsa-miR-4677-3p
					PIAS2	hsa-miR-4701-5p_L+1
					PIAS2	hsa-miR-4738-3p_L-1
					PIAS2	hsa-miR-4802-5p
					PIAS2	hsa-miR-485-5p_R+1
					PIAS2	hsa-miR-491-5p
					PIAS2	hsa-miR-494-3p_R+1
					PIAS2	hsa-miR-5010-5p
					PIAS2	hsa-miR-504-5p
					PIAS2	hsa-miR-5187-5p
					PIAS2	hsa-miR-539-5p_R+1
					PIAS2	hsa-miR-543_R+1
					PIAS2	hsa-miR-545-3p
					PIAS2	hsa-miR-548ay-3p
					PIAS2	hsa-miR-550a-3p
					PIAS2	hsa-miR-576-5p
					PIAS2	hsa-miR-582-5p
					PIAS2	hsa-miR-624-5p_R-1
					PIAS2	hsa-miR-6501-5p_R+1
					PIAS2	hsa-miR-6513-3p_R+1
					PIAS2	hsa-miR-6886-3p_R+2
					PIAS2	hsa-miR-7109-3p_R+1
					PIAS2	hsa-miR-873-3p
					PIAS2	hsa-miR-873-5p_L+1R-3
					PIAS2	hsa-miR-93-3p_R+1
					PIAS2	hsa-miR-939-5p_R+1
					PIAS2	hsa-miR-9985_R-1_1ss16CT
					PIAS2	hsa-mir-10527-p3_1ss9TC
					PIAS2	hsa-mir-1273c-p3_1ss24GT
					PIAS2	hsa-mir-4440-p5_1ss22CA
					PIAS2	hsa-mir-4781-p3
					PIAS2	hsa-mir-544b-p5_1ss16TG
					PIAS2	hsa-mir-548aw-p3_1ss1TC
					PIAS2	hsa-mir-548ax-p3
					PIAS2	hsa-mir-548y-p3_1ss1CT
					PIAS2	mdo-miR-181b-5p_R+3
					PIAS2	mmu-let-7j_R-2
					PIAS2	mmu-miR-3084-3p_R+4_1ss2TG
					PIAS2	mmu-mir-6236-p3_3
					PIAS2	ssc-miR-451_L+4R-2
					PIAS2	ssc-mir-150-1-p3_1ss1TA
					PIAS2	PC-3p-930_1380
					PIAS2	bta-miR-342_R-3
					PIAS2	cgr-miR-532-5p_R+2_1
					PIAS2	cgr-miR-532-5p_R+2_2
					PIAS2	hsa-miR-337-3p_L-1
					PIAS2	hsa-miR-342-3p
					PIAS2	hsa-miR-3614-3p_R-1
					PIAS2	hsa-miR-363-3p_R+1
					PIAS2	hsa-miR-409-3p
					PIAS2	hsa-miR-410-3p
					PIAS2	hsa-miR-874-3p
					PIAS2	hsa-miR-885-5p
					PIAS2	mmu-mir-6240-p3_1ss21GT
					PRLR	PC-3p-18565_22
					PRLR	PC-3p-26513_12
					PRLR	PC-3p-43265_5
					PRLR	PC-3p-45328_5
					PRLR	PC-3p-930_1380
					PRLR	PC-5p-25681_13
					PRLR	PC-5p-31749_9
					PRLR	PC-5p-33957_8
					PRLR	PC-5p-34170_8
					PRLR	PC-5p-36416_7
					PRLR	bta-miR-185_L+1_1ss23AT
					PRLR	bta-miR-2285bm_1ss14GA
					PRLR	bta-miR-2424_L-3
					PRLR	bta-miR-6119-5p
					PRLR	bta-mir-1246-p5_1ss18GA
					PRLR	cgr-miR-1285_L-4R-1_1ss15GA
					PRLR	chi-miR-16b-5p
					PRLR	cja-miR-151_R+1
					PRLR	cja-miR-548r_R+2_1ss9TG
					PRLR	cja-miR-9983_L-1R+1
					PRLR	cpo-miR-154-5p_R+1
					PRLR	dno-miR-134-5p_R+1_1ss22CT
					PRLR	hsa-let-7e-5p
					PRLR	hsa-let-7g-3p_R+1
					PRLR	hsa-miR-1-3p
					PRLR	hsa-miR-1185-5p_R+1
					PRLR	hsa-miR-1197
					PRLR	hsa-miR-1228-3p
					PRLR	hsa-miR-125b-2-3p_L-2R+1
					PRLR	hsa-miR-1270
					PRLR	hsa-miR-1303_L+1
					PRLR	hsa-miR-134-5p
					PRLR	hsa-miR-135a-3p_L+1_1ss23GA
					PRLR	hsa-miR-136-5p_R-1
					PRLR	hsa-miR-151a-5p
					PRLR	hsa-miR-151b_R+2
					PRLR	hsa-miR-181a-2-3p
					PRLR	hsa-miR-181b-2-3p
					PRLR	hsa-miR-186-3p_R-4
					PRLR	hsa-miR-193a-3p
					PRLR	hsa-miR-193b-3p
					PRLR	hsa-miR-203a-3p_R+1
					PRLR	hsa-miR-210-3p
					PRLR	hsa-miR-211-5p
					PRLR	hsa-miR-2110_R+1
					PRLR	hsa-miR-214-3p
					PRLR	hsa-miR-2355-5p_R+1
					PRLR	hsa-miR-30d-3p
					PRLR	hsa-miR-3115
					PRLR	hsa-miR-3130-3p
					PRLR	hsa-miR-3136-5p
					PRLR	hsa-miR-3140-3p_R-1
					PRLR	hsa-miR-3143_R-3
					PRLR	hsa-miR-323b-3p_R-1
					PRLR	hsa-miR-328-3p
					PRLR	hsa-miR-329-3p
					PRLR	hsa-miR-335-3p
					PRLR	hsa-miR-3679-5p_R-2
					PRLR	hsa-miR-375-3p
					PRLR	hsa-miR-376a-5p_L+1R-1
					PRLR	hsa-miR-381-3p
					PRLR	hsa-miR-431-5p_R-1
					PRLR	hsa-miR-4521_R+4
					PRLR	hsa-miR-4659a-3p
					PRLR	hsa-miR-4659b-3p_L+1R-1
					PRLR	hsa-miR-4676-5p_R+1
					PRLR	hsa-miR-4775
					PRLR	hsa-miR-4804-5p_L+1R-1_1ss7CG
					PRLR	hsa-miR-487a-5p
					PRLR	hsa-miR-494-3p_R+1
					PRLR	hsa-miR-497-5p
					PRLR	hsa-miR-5001-3p_R+1
					PRLR	hsa-miR-5187-5p
					PRLR	hsa-miR-5189-3p
					PRLR	hsa-miR-539-5p_R+1
					PRLR	hsa-miR-545-3p
					PRLR	hsa-miR-548ab
					PRLR	hsa-miR-548ag_1ss4GA
					PRLR	hsa-miR-576-5p
					PRLR	hsa-miR-582-5p
					PRLR	hsa-miR-629-3p
					PRLR	hsa-miR-6837-3p
					PRLR	hsa-miR-6859-5p
					PRLR	hsa-miR-7705_R-1
					PRLR	hsa-miR-873-5p_L+1R-3
					PRLR	hsa-miR-876-5p_R-1
					PRLR	hsa-miR-939-5p_R+1
					PRLR	hsa-mir-1273c-p3_1ss24GT
					PRLR	hsa-mir-3133-p3
					PRLR	hsa-mir-544b-p5_1ss16TG
					PRLR	hsa-mir-641-p3
					PRLR	mdo-miR-22-3p_R+1
					PRLR	mdo-miR-26-5p_L+1R+1
					PRLR	mdo-miR-26-5p_R+3
					PRLR	mmu-let-7c-5p_R+2
					PRLR	mmu-miR-101c_L+1R+2
					PRLR	mmu-miR-3964_L+1R+1_1ss6GA
					PRLR	mmu-mir-6236-p3_3
					PRLR	mmu-mir-6240-p3_1ss21GT
					PRLR	mmu-mir-7650-p5_1ss16CT
					PRLR	oga-miR-28b_R+3
					PRLR	ppy-miR-1976_L+1R+1
					PRLR	ppy-mir-1268-p3_1ss11TC
					PRLR	hsa-miR-1306-5p_R-1
					GHR	PC-3p-42970_5
					GHR	hsa-let-7e-5p
					GHR	hsa-miR-133a-5p
					GHR	hsa-miR-141-3p_R-1
					GHR	hsa-miR-146a-3p_L+1R-2
					GHR	hsa-miR-200a-3p_R+1
					GHR	hsa-miR-33a-3p_R-1
					GHR	hsa-miR-433-3p
					GHR	hsa-miR-7851-3p
					GHR	hsa-mir-3135b-p3_1ss17CG
					EGFR	bta-miR-11980_R-1_1ss4CG
					EGFR	bta-miR-150
					EGFR	hsa-miR-1229-3p
					EGFR	hsa-miR-2276-3p
					EGFR	hsa-miR-3173-5p
					EGFR	hsa-miR-329-3p
					EGFR	hsa-miR-409-3p
					EGFR	hsa-miR-4665-5p
					EGFR	hsa-miR-4701-5p_L+1
					EGFR	hsa-miR-485-5p_R+1
					EGFR	hsa-miR-5010-3p_R+1
					EGFR	hsa-miR-5586-5p
					EGFR	hsa-miR-627-5p_1ss2TG
					EGFR	hsa-miR-6511a-3p_R+1
					EGFR	hsa-miR-6799-3p_R-1
					EGFR	hsa-miR-876-5p_R-1
					EGFR	ppy-miR-1976_L+1R+1
					PRF1	hsa-miR-125a-5p
					PRF1	mmu-mir-6240-p3_1ss21GT
