# Supplementary material for: Signalling networks constructed by integrative analysis of multi-omics in peripheral blood mononuclear cells in systemic lupus erythematous patients
Source: Research Square preprint supplement (doi:10.21203/rs.3.rs-60254/v1), 2021-04-21
Supplement: Supplementary file 3 [file bbaead7e9f0ac0cbe95877f6.xlsx]

## Sheet: Sheet1
RNA	regulation	miRNA	regulation	mRNA	regulation
circRNA7429	up	PC-3p-18565_22	up	TLR7:ENST00000380659	up
circRNA13950	up	PC-5p-25681_13	up	TLR7:ENST00000380659	up
circRNA2692	up	PC-5p-25681_13	up	TLR7:ENST00000380659	up
circRNA3453	up	PC-5p-25681_13	up	TLR7:ENST00000380659	up
circRNA11459	up	bta-miR-150	down	TLR7:ENST00000380659	up
circRNA11934	down	bta-miR-150	down	TLR7:ENST00000380659	up
circRNA13950	up	bta-miR-150	down	TLR7:ENST00000380659	up
circRNA2692	up	bta-miR-2424_L-3	down	TLR7:ENST00000380659	up
circRNA2013	up	hsa-miR-1255a	up	TLR7:ENST00000380659	up
circRNA10508	up	hsa-miR-127-5p_R+1	up	TLR7:ENST00000380659	up
circRNA8162	down	hsa-miR-127-5p_R+1	up	TLR7:ENST00000380659	up
circRNA3680	down	hsa-miR-148b-3p	down	TLR7:ENST00000380659	up
circRNA2333	down	hsa-miR-186-3p_R-4	down	TLR7:ENST00000380659	up
circRNA11934	down	hsa-miR-29b-1-5p	up	TLR7:ENST00000380659	up
circRNA3016	down	hsa-miR-29b-1-5p	up	TLR7:ENST00000380659	up
circRNA7309	up	hsa-miR-29b-1-5p	up	TLR7:ENST00000380659	up
circRNA11934	down	hsa-miR-29b-2-5p_R+1	up	TLR7:ENST00000380659	up
circRNA2092	up	hsa-miR-29b-2-5p_R+1	up	TLR7:ENST00000380659	up
circRNA10508	up	hsa-miR-301b-3p	down	TLR7:ENST00000380659	up
circRNA11886	up	hsa-miR-3140-3p_R-1	down	TLR7:ENST00000380659	up
circRNA447	up	hsa-miR-3140-3p_R-1	down	TLR7:ENST00000380659	up
circRNA450	up	hsa-miR-3140-3p_R-1	down	TLR7:ENST00000380659	up
circRNA702	down	hsa-miR-3140-3p_R-1	down	TLR7:ENST00000380659	up
circRNA7429	up	hsa-miR-382-5p	up	TLR7:ENST00000380659	up
circRNA1067	up	hsa-miR-432-5p_1ss23GT	up	TLR7:ENST00000380659	up
circRNA11459	up	hsa-miR-433-3p	up	TLR7:ENST00000380659	up
circRNA3069	down	hsa-miR-4446-5p_R+1	down	TLR7:ENST00000380659	up
circRNA8846	up	hsa-miR-4446-5p_R+1	down	TLR7:ENST00000380659	up
circRNA11459	up	hsa-miR-4659a-3p	up	TLR7:ENST00000380659	up
circRNA1747	up	hsa-miR-4659a-3p	up	TLR7:ENST00000380659	up
circRNA447	up	hsa-miR-4659a-3p	up	TLR7:ENST00000380659	up
circRNA7429	up	hsa-miR-4659a-3p	up	TLR7:ENST00000380659	up
circRNA8846	up	hsa-miR-4659a-3p	up	TLR7:ENST00000380659	up
circRNA13950	up	hsa-miR-4659b-3p_L+1R-1	up	TLR7:ENST00000380659	up
circRNA447	up	hsa-miR-4659b-3p_L+1R-1	up	TLR7:ENST00000380659	up
circRNA7309	up	hsa-miR-4659b-3p_L+1R-1	up	TLR7:ENST00000380659	up
circRNA7429	up	hsa-miR-4659b-3p_L+1R-1	up	TLR7:ENST00000380659	up
circRNA8162	down	hsa-miR-4659b-3p_L+1R-1	up	TLR7:ENST00000380659	up
circRNA8846	up	hsa-miR-4659b-3p_L+1R-1	up	TLR7:ENST00000380659	up
circRNA12827	up	hsa-miR-4676-3p_R-1	up	TLR7:ENST00000380659	up
circRNA13950	up	hsa-miR-4676-3p_R-1	up	TLR7:ENST00000380659	up
circRNA2092	up	hsa-miR-497-5p	up	TLR7:ENST00000380659	up
circRNA3453	up	hsa-miR-497-5p	up	TLR7:ENST00000380659	up
circRNA7429	up	hsa-miR-548ab	up	TLR7:ENST00000380659	up
circRNA7429	up	hsa-miR-548ag_1ss4GA	up	TLR7:ENST00000380659	up
circRNA7429	up	hsa-miR-548aq-5p	down	TLR7:ENST00000380659	up
circRNA7429	up	hsa-miR-548au-5p_R+1	down	TLR7:ENST00000380659	up
circRNA13186	up	hsa-miR-619-5p_1ss1GA	down	TLR7:ENST00000380659	up
circRNA8846	up	hsa-miR-619-5p_1ss1GA	down	TLR7:ENST00000380659	up
circRNA11459	up	hsa-miR-629-3p	up	TLR7:ENST00000380659	up
circRNA10508	up	hsa-miR-6513-3p_R+1	down	TLR7:ENST00000380659	up
circRNA11459	up	hsa-miR-660-3p_R+1	up	TLR7:ENST00000380659	up
circRNA8162	down	hsa-miR-6818-5p	down	TLR7:ENST00000380659	up
circRNA11934	down	hsa-miR-758-3p	up	TLR7:ENST00000380659	up
circRNA7429	up	hsa-miR-758-3p	up	TLR7:ENST00000380659	up
circRNA11934	down	hsa-miR-943_L+1R+1	up	TLR7:ENST00000380659	up
circRNA447	up	hsa-miR-943_L+1R+1	up	TLR7:ENST00000380659	up
circRNA450	up	hsa-miR-943_L+1R+1	up	TLR7:ENST00000380659	up
circRNA5896	up	hsa-miR-943_L+1R+1	up	TLR7:ENST00000380659	up
circRNA10508	up	mmu-miR-101c_L+1R+2	up	TLR7:ENST00000380659	up
circRNA10508	up	mmu-mir-6240-p5_2ss1GN23GT	up	TLR7:ENST00000380659	up
circRNA2013	up	mmu-mir-6240-p5_2ss1GN23GT	up	TLR7:ENST00000380659	up
circRNA10508	up	ppy-miR-1976_L+1R+1	up	TLR7:ENST00000380659	up
circRNA2692	up	ppy-miR-1976_L+1R+1	up	TLR7:ENST00000380659	up
circRNA811	up	ppy-miR-1976_L+1R+1	up	TLR7:ENST00000380659	up
circRNA10508	up	efu-mir-9298-p3_1ss18CT	down	C1QA:ENST00000374642	up
circRNA10508	up	efu-mir-9298-p5_1ss18CT	down	C1QA:ENST00000374642	up
circRNA1747	up	hsa-miR-103a-1-5p	up	C1QA:ENST00000374642	up
circRNA2692	up	hsa-miR-103a-1-5p	up	C1QA:ENST00000374642	up
circRNA450	up	hsa-miR-103a-1-5p	up	C1QA:ENST00000374642	up
circRNA7429	up	hsa-miR-103a-1-5p	up	C1QA:ENST00000374642	up
circRNA8846	up	hsa-miR-103a-1-5p	up	C1QA:ENST00000374642	up
circRNA1747	up	hsa-miR-103a-2-5p_R+1	down	C1QA:ENST00000374642	up
circRNA2692	up	hsa-miR-103a-2-5p_R+1	down	C1QA:ENST00000374642	up
circRNA450	up	hsa-miR-103a-2-5p_R+1	down	C1QA:ENST00000374642	up
circRNA7429	up	hsa-miR-103a-2-5p_R+1	down	C1QA:ENST00000374642	up
circRNA8846	up	hsa-miR-103a-2-5p_R+1	down	C1QA:ENST00000374642	up
circRNA7429	up	hsa-miR-214-3p	up	C1QA:ENST00000374642	up
circRNA12827	up	hsa-let-7e-5p	up	C2:ENST00000299367	up
circRNA10508	up	hsa-miR-1249-5p	up	C2:ENST00000299367	up
circRNA2692	up	hsa-miR-125a-5p	up	C2:ENST00000299367	up
circRNA2092	up	hsa-miR-125b-2-3p_L-2R+1	down	C2:ENST00000299367	up
circRNA2692	up	hsa-miR-125b-5p	down	C2:ENST00000299367	up
circRNA3680	down	hsa-miR-3187-3p_R+1	up	C2:ENST00000299367	up
circRNA2692	up	hsa-miR-4662b	down	C2:ENST00000299367	up
circRNA7429	up	hsa-miR-4662b	down	C2:ENST00000299367	up
circRNA10508	up	hsa-miR-6515-5p	up	C2:ENST00000299367	up
circRNA12827	up	mmu-let-7c-5p_R+2	up	C2:ENST00000299367	up
circRNA2692	up	mmu-miR-351-5p_R-2	up	C2:ENST00000299367	up
circRNA2692	up	sha-miR-125a_R+2	down	C2:ENST00000299367	up
circRNA7429	up	PC-3p-18565_22	up	IFNAR2:ENST00000404220	up
circRNA2013	up	PC-3p-9143_61	down	IFNAR2:ENST00000404220	up
circRNA2092	up	PC-5p-38995_6	up	IFNAR2:ENST00000404220	up
circRNA2013	up	bta-miR-2285bm_1ss14GA	down	IFNAR2:ENST00000404220	up
circRNA8846	up	cgr-miR-1260_R+2_1	up	IFNAR2:ENST00000404220	up
circRNA8846	up	cgr-miR-1260_R+2_2	up	IFNAR2:ENST00000404220	up
circRNA8846	up	cgr-miR-1260_R+2_3	up	IFNAR2:ENST00000404220	up
circRNA8846	up	cgr-miR-1260_R+2_4	up	IFNAR2:ENST00000404220	up
circRNA8846	up	cgr-miR-1260_R+2_5	up	IFNAR2:ENST00000404220	up
circRNA8846	up	cgr-miR-1260_R+2_6	up	IFNAR2:ENST00000404220	up
circRNA10508	up	efu-mir-9298-p3_1ss18CT	down	IFNAR2:ENST00000404220	up
circRNA10508	up	efu-mir-9298-p5_1ss18CT	down	IFNAR2:ENST00000404220	up
circRNA2092	up	hsa-miR-103a-3p	up	IFNAR2:ENST00000404220	up
circRNA2692	up	hsa-miR-125a-5p	up	IFNAR2:ENST00000404220	up
circRNA2692	up	hsa-miR-125b-5p	down	IFNAR2:ENST00000404220	up
circRNA11886	up	hsa-miR-1270	up	IFNAR2:ENST00000404220	up
circRNA7429	up	hsa-miR-1270	up	IFNAR2:ENST00000404220	up
circRNA12827	up	hsa-miR-1343-3p	up	IFNAR2:ENST00000404220	up
circRNA13950	up	hsa-miR-1343-3p	up	IFNAR2:ENST00000404220	up
circRNA3680	down	hsa-miR-1343-3p	up	IFNAR2:ENST00000404220	up
circRNA12891	down	hsa-miR-146a-3p_L+1R-2	down	IFNAR2:ENST00000404220	up
circRNA3016	down	hsa-miR-146a-3p_L+1R-2	down	IFNAR2:ENST00000404220	up
circRNA2333	down	hsa-miR-186-3p_R-4	down	IFNAR2:ENST00000404220	up
circRNA2692	up	hsa-miR-188-3p	down	IFNAR2:ENST00000404220	up
circRNA13186	up	hsa-miR-18a-3p_1ss23GA	up	IFNAR2:ENST00000404220	up
circRNA2692	up	hsa-miR-18a-3p_1ss23GA	up	IFNAR2:ENST00000404220	up
circRNA12827	up	hsa-miR-193a-3p	down	IFNAR2:ENST00000404220	up
circRNA12827	up	hsa-miR-193b-3p	down	IFNAR2:ENST00000404220	up
circRNA13950	up	hsa-miR-211-5p	down	IFNAR2:ENST00000404220	up
circRNA8846	up	hsa-miR-211-5p	down	IFNAR2:ENST00000404220	up
circRNA1067	up	hsa-miR-3605-3p	up	IFNAR2:ENST00000404220	up
circRNA13950	up	hsa-miR-363-3p_R+1	down	IFNAR2:ENST00000404220	up
circRNA8162	down	hsa-miR-3677-3p	down	IFNAR2:ENST00000404220	up
circRNA1067	up	hsa-miR-432-5p_1ss23GT	up	IFNAR2:ENST00000404220	up
circRNA12891	down	hsa-miR-4433b-3p_L+1_1ss9GC	up	IFNAR2:ENST00000404220	up
circRNA11459	up	hsa-miR-4659a-3p	up	IFNAR2:ENST00000404220	up
circRNA1747	up	hsa-miR-4659a-3p	up	IFNAR2:ENST00000404220	up
circRNA447	up	hsa-miR-4659a-3p	up	IFNAR2:ENST00000404220	up
circRNA7429	up	hsa-miR-4659a-3p	up	IFNAR2:ENST00000404220	up
circRNA8846	up	hsa-miR-4659a-3p	up	IFNAR2:ENST00000404220	up
circRNA13950	up	hsa-miR-4659b-3p_L+1R-1	up	IFNAR2:ENST00000404220	up
circRNA447	up	hsa-miR-4659b-3p_L+1R-1	up	IFNAR2:ENST00000404220	up
circRNA7309	up	hsa-miR-4659b-3p_L+1R-1	up	IFNAR2:ENST00000404220	up
circRNA7429	up	hsa-miR-4659b-3p_L+1R-1	up	IFNAR2:ENST00000404220	up
circRNA8162	down	hsa-miR-4659b-3p_L+1R-1	up	IFNAR2:ENST00000404220	up
circRNA8846	up	hsa-miR-4659b-3p_L+1R-1	up	IFNAR2:ENST00000404220	up
circRNA12827	up	hsa-miR-4676-3p_R-1	up	IFNAR2:ENST00000404220	up
circRNA13950	up	hsa-miR-4676-3p_R-1	up	IFNAR2:ENST00000404220	up
circRNA7429	up	hsa-miR-4738-3p_L-1	down	IFNAR2:ENST00000404220	up
circRNA13107	down	hsa-miR-4804-5p_L+1R-1_1ss7CG	up	IFNAR2:ENST00000404220	up
circRNA13186	up	hsa-miR-4804-5p_L+1R-1_1ss7CG	up	IFNAR2:ENST00000404220	up
circRNA7309	up	hsa-miR-4804-5p_L+1R-1_1ss7CG	up	IFNAR2:ENST00000404220	up
circRNA8162	down	hsa-miR-491-5p	up	IFNAR2:ENST00000404220	up
circRNA10508	up	hsa-miR-493-5p	up	IFNAR2:ENST00000404220	up
circRNA13950	up	hsa-miR-493-5p	up	IFNAR2:ENST00000404220	up
circRNA2333	down	hsa-miR-493-5p	up	IFNAR2:ENST00000404220	up
circRNA10508	up	hsa-miR-5193	up	IFNAR2:ENST00000404220	up
circRNA13950	up	hsa-miR-5193	up	IFNAR2:ENST00000404220	up
circRNA3016	down	hsa-miR-5193	up	IFNAR2:ENST00000404220	up
circRNA13186	up	hsa-miR-619-5p_1ss1GA	down	IFNAR2:ENST00000404220	up
circRNA8846	up	hsa-miR-619-5p_1ss1GA	down	IFNAR2:ENST00000404220	up
circRNA3453	up	hsa-miR-939-5p_R+1	up	IFNAR2:ENST00000404220	up
circRNA12891	down	hsa-mir-3166-p5	up	IFNAR2:ENST00000404220	up
circRNA13186	up	hsa-mir-3166-p5	up	IFNAR2:ENST00000404220	up
circRNA5896	up	hsa-mir-3166-p5	up	IFNAR2:ENST00000404220	up
circRNA8846	up	hsa-mir-7851-p5_1ss12TG	up	IFNAR2:ENST00000404220	up
circRNA2092	up	mdo-miR-106-5p_R+2_1ss1AT	up	IFNAR2:ENST00000404220	up
circRNA2692	up	mmu-miR-351-5p_R-2	up	IFNAR2:ENST00000404220	up
circRNA10508	up	mmu-miR-497b_L-1	up	IFNAR2:ENST00000404220	up
circRNA3016	down	mmu-miR-497b_L-1	up	IFNAR2:ENST00000404220	up
circRNA2013	up	mmu-mir-7650-p5_1ss16CT	down	IFNAR2:ENST00000404220	up
circRNA2692	up	mmu-mir-7650-p5_1ss16CT	down	IFNAR2:ENST00000404220	up
circRNA10508	up	ppy-miR-1976_L+1R+1	up	IFNAR2:ENST00000404220	up
circRNA2692	up	ppy-miR-1976_L+1R+1	up	IFNAR2:ENST00000404220	up
circRNA811	up	ppy-miR-1976_L+1R+1	up	IFNAR2:ENST00000404220	up
circRNA3680	down	ptr-mir-4667-p3_1ss22GT	up	IFNAR2:ENST00000404220	up
circRNA2692	up	sha-miR-125a_R+2	down	IFNAR2:ENST00000404220	up
circRNA10508	up	PC-3p-32105_9	up	STAT2:ENST00000557235	up
circRNA10508	up	PC-5p-46446_5	down	STAT2:ENST00000557235	up
circRNA2692	up	hsa-miR-125a-5p	up	STAT2:ENST00000557235	up
circRNA2692	up	hsa-miR-125b-5p	down	STAT2:ENST00000557235	up
circRNA13186	up	hsa-miR-18a-3p_1ss23GA	up	STAT2:ENST00000557235	up
circRNA2692	up	hsa-miR-18a-3p_1ss23GA	up	STAT2:ENST00000557235	up
circRNA7429	up	hsa-miR-214-3p	up	STAT2:ENST00000557235	up
circRNA10508	up	hsa-miR-26b-3p_R+1	down	STAT2:ENST00000557235	up
circRNA11934	down	hsa-miR-26b-3p_R+1	down	STAT2:ENST00000557235	up
circRNA12435	up	hsa-miR-409-3p	up	STAT2:ENST00000557235	up
circRNA1067	up	hsa-miR-432-5p_1ss23GT	up	STAT2:ENST00000557235	up
circRNA13950	up	hsa-miR-874-3p	down	STAT2:ENST00000557235	up
circRNA2692	up	mmu-miR-351-5p_R-2	up	STAT2:ENST00000557235	up
circRNA2692	up	sha-miR-125a_R+2	down	STAT2:ENST00000557235	up
circRNA10508	up	PC-3p-37309_7	up	IFNAR2:ENST00000342136	down
circRNA10508	up	PC-5p-46446_5	down	IFNAR2:ENST00000342136	down
circRNA8846	up	cgr-miR-1260_R+2_1	up	IFNAR2:ENST00000342136	down
circRNA8846	up	cgr-miR-1260_R+2_2	up	IFNAR2:ENST00000342136	down
circRNA8846	up	cgr-miR-1260_R+2_3	up	IFNAR2:ENST00000342136	down
circRNA8846	up	cgr-miR-1260_R+2_4	up	IFNAR2:ENST00000342136	down
circRNA8846	up	cgr-miR-1260_R+2_5	up	IFNAR2:ENST00000342136	down
circRNA8846	up	cgr-miR-1260_R+2_6	up	IFNAR2:ENST00000342136	down
circRNA12891	down	hsa-miR-146a-3p_L+1R-2	down	IFNAR2:ENST00000342136	down
circRNA3016	down	hsa-miR-146a-3p_L+1R-2	down	IFNAR2:ENST00000342136	down
circRNA2692	up	hsa-miR-2110_R+1	up	IFNAR2:ENST00000342136	down
circRNA13950	up	hsa-miR-377-3p	up	IFNAR2:ENST00000342136	down
circRNA1067	up	hsa-miR-432-5p_1ss23GT	up	IFNAR2:ENST00000342136	down
circRNA12891	down	hsa-miR-4433b-3p_L+1_1ss9GC	up	IFNAR2:ENST00000342136	down
circRNA3069	down	hsa-miR-4446-5p_R+1	down	IFNAR2:ENST00000342136	down
circRNA8846	up	hsa-miR-4446-5p_R+1	down	IFNAR2:ENST00000342136	down
circRNA8162	down	hsa-miR-491-5p	up	IFNAR2:ENST00000342136	down
circRNA12435	up	hsa-miR-5006-3p_R+1	down	IFNAR2:ENST00000342136	down
circRNA8846	up	hsa-miR-5006-3p_R+1	down	IFNAR2:ENST00000342136	down
circRNA10508	up	hsa-miR-5193	up	IFNAR2:ENST00000342136	down
circRNA13950	up	hsa-miR-5193	up	IFNAR2:ENST00000342136	down
circRNA3016	down	hsa-miR-5193	up	IFNAR2:ENST00000342136	down
circRNA13521	up	hsa-miR-7851-3p	down	IFNAR2:ENST00000342136	down
circRNA3453	up	hsa-miR-939-5p_R+1	up	IFNAR2:ENST00000342136	down
circRNA8846	up	hsa-mir-7851-p5_1ss12TG	up	IFNAR2:ENST00000342136	down
circRNA2092	up	mdo-miR-106-5p_R+2_1ss1AT	up	IFNAR2:ENST00000342136	down
circRNA10508	up	mmu-miR-497b_L-1	up	IFNAR2:ENST00000342136	down
circRNA3016	down	mmu-miR-497b_L-1	up	IFNAR2:ENST00000342136	down
circRNA2092	up	cja-miR-9933_L-5_1ss12AT	down	IRF5:ENST00000473745	down
circRNA10508	up	hsa-miR-181c-5p_R+1	down	IRF5:ENST00000473745	down
circRNA1067	up	hsa-miR-30c-2-3p	up	IRF5:ENST00000473745	down
circRNA12827	up	hsa-miR-30c-2-3p	up	IRF5:ENST00000473745	down
circRNA11886	up	hsa-miR-3140-3p_R-1	down	IRF5:ENST00000473745	down
circRNA447	up	hsa-miR-3140-3p_R-1	down	IRF5:ENST00000473745	down
circRNA450	up	hsa-miR-3140-3p_R-1	down	IRF5:ENST00000473745	down
circRNA702	down	hsa-miR-3140-3p_R-1	down	IRF5:ENST00000473745	down
circRNA13521	up	hsa-miR-3173-5p	up	IRF5:ENST00000473745	down
circRNA11459	up	hsa-miR-629-3p	up	IRF5:ENST00000473745	down
circRNA10508	up	hsa-miR-6501-5p_R+1	up	IRF5:ENST00000473745	down
circRNA7429	up	hsa-miR-6501-5p_R+1	up	IRF5:ENST00000473745	down
circRNA13521	up	hsa-miR-6799-3p_R-1	up	IRF5:ENST00000473745	down
circRNA702	down	hsa-miR-6859-5p	up	IRF5:ENST00000473745	down
circRNA13950	up	hsa-miR-874-3p	down	IRF5:ENST00000473745	down
circRNA2692	up	hsa-miR-874-5p	down	IRF5:ENST00000473745	down
circRNA12891	down	hsa-mir-3166-p5	up	IRF5:ENST00000473745	down
circRNA13186	up	hsa-mir-3166-p5	up	IRF5:ENST00000473745	down
circRNA5896	up	hsa-mir-3166-p5	up	IRF5:ENST00000473745	down
circRNA7309	up	hsa-mir-3202-1-p5	up	IRF5:ENST00000473745	down
circRNA7309	up	hsa-mir-3202-2-p5	up	IRF5:ENST00000473745	down
circRNA10508	up	mdo-miR-181b-5p_R+3	up	IRF5:ENST00000473745	down
circRNA13186	up	mdo-miR-22-3p_R+1	up	IRF5:ENST00000473745	down
circRNA13186	up	mmu-miR-3084-3p_R+4_1ss2TG	up	IRF5:ENST00000473745	down
circRNA3069	down	mmu-mir-6240-p5_1ss22GT	up	IRF5:ENST00000473745	down
circRNA10508	up	mmu-mir-6240-p5_2ss1GN23GT	up	IRF5:ENST00000473745	down
circRNA2013	up	mmu-mir-6240-p5_2ss1GN23GT	up	IRF5:ENST00000473745	down
circRNA2092	up	cja-miR-9933_L-5_1ss12AT	down	IRF5:ENST00000402030	up
circRNA10508	up	efu-mir-9298-p3_1ss18CT	down	IRF5:ENST00000402030	up
circRNA10508	up	efu-mir-9298-p5_1ss18CT	down	IRF5:ENST00000402030	up
circRNA2692	up	hsa-miR-146a-5p	down	IRF5:ENST00000402030	up
circRNA2692	up	hsa-miR-146b-5p_R-1	down	IRF5:ENST00000402030	up
circRNA10508	up	hsa-miR-181c-5p_R+1	down	IRF5:ENST00000402030	up
circRNA13186	up	hsa-miR-18a-3p_1ss23GA	up	IRF5:ENST00000402030	up
circRNA2692	up	hsa-miR-18a-3p_1ss23GA	up	IRF5:ENST00000402030	up
circRNA10508	up	hsa-miR-27a-3p	down	IRF5:ENST00000402030	up
circRNA10508	up	hsa-miR-27b-3p	down	IRF5:ENST00000402030	up
circRNA1067	up	hsa-miR-30c-2-3p	up	IRF5:ENST00000402030	up
circRNA12827	up	hsa-miR-30c-2-3p	up	IRF5:ENST00000402030	up
circRNA2333	down	hsa-miR-3130-3p	up	IRF5:ENST00000402030	up
circRNA11886	up	hsa-miR-3140-3p_R-1	down	IRF5:ENST00000402030	up
circRNA447	up	hsa-miR-3140-3p_R-1	down	IRF5:ENST00000402030	up
circRNA450	up	hsa-miR-3140-3p_R-1	down	IRF5:ENST00000402030	up
circRNA702	down	hsa-miR-3140-3p_R-1	down	IRF5:ENST00000402030	up
circRNA13521	up	hsa-miR-3173-5p	up	IRF5:ENST00000402030	up
circRNA11459	up	hsa-miR-629-3p	up	IRF5:ENST00000402030	up
circRNA10508	up	hsa-miR-6501-5p_R+1	up	IRF5:ENST00000402030	up
circRNA7429	up	hsa-miR-6501-5p_R+1	up	IRF5:ENST00000402030	up
circRNA11459	up	hsa-miR-660-3p_R+1	up	IRF5:ENST00000402030	up
circRNA13521	up	hsa-miR-6799-3p_R-1	up	IRF5:ENST00000402030	up
circRNA702	down	hsa-miR-6859-5p	up	IRF5:ENST00000402030	up
circRNA13950	up	hsa-miR-874-3p	down	IRF5:ENST00000402030	up
circRNA2692	up	hsa-miR-874-5p	down	IRF5:ENST00000402030	up
circRNA10508	up	hsa-miR-9985_R-1_1ss16CT	down	IRF5:ENST00000402030	up
circRNA12891	down	hsa-mir-3166-p5	up	IRF5:ENST00000402030	up
circRNA13186	up	hsa-mir-3166-p5	up	IRF5:ENST00000402030	up
circRNA5896	up	hsa-mir-3166-p5	up	IRF5:ENST00000402030	up
circRNA7309	up	hsa-mir-3202-1-p5	up	IRF5:ENST00000402030	up
circRNA7309	up	hsa-mir-3202-2-p5	up	IRF5:ENST00000402030	up
circRNA10508	up	mdo-miR-181b-5p_R+3	up	IRF5:ENST00000402030	up
circRNA13186	up	mdo-miR-22-3p_R+1	up	IRF5:ENST00000402030	up
circRNA2692	up	mmu-miR-146a-5p_R+1	down	IRF5:ENST00000402030	up
circRNA2692	up	mmu-miR-146a-5p_R+1_1ss22TA	down	IRF5:ENST00000402030	up
circRNA13186	up	mmu-miR-3084-3p_R+4_1ss2TG	up	IRF5:ENST00000402030	up
circRNA3069	down	mmu-mir-6240-p5_1ss22GT	up	IRF5:ENST00000402030	up
circRNA10508	up	mmu-mir-6240-p5_2ss1GN23GT	up	IRF5:ENST00000402030	up
circRNA2013	up	mmu-mir-6240-p5_2ss1GN23GT	up	IRF5:ENST00000402030	up
circRNA2692	up	ocu-miR-146b-5p_R-1_1ss23GA	down	IRF5:ENST00000402030	up
circRNA12827	up	PC-3p-31135_9	up	IRAK4:ENST00000550615	down
circRNA10508	up	PC-3p-37309_7	up	IRAK4:ENST00000550615	down
circRNA7309	up	bta-miR-199c_L-1R+3	up	IRAK4:ENST00000550615	down
circRNA1747	up	hsa-miR-103a-1-5p	up	IRAK4:ENST00000550615	down
circRNA2692	up	hsa-miR-103a-1-5p	up	IRAK4:ENST00000550615	down
circRNA450	up	hsa-miR-103a-1-5p	up	IRAK4:ENST00000550615	down
circRNA7429	up	hsa-miR-103a-1-5p	up	IRAK4:ENST00000550615	down
circRNA8846	up	hsa-miR-103a-1-5p	up	IRAK4:ENST00000550615	down
circRNA1747	up	hsa-miR-103a-2-5p_R+1	down	IRAK4:ENST00000550615	down
circRNA2692	up	hsa-miR-103a-2-5p_R+1	down	IRAK4:ENST00000550615	down
circRNA450	up	hsa-miR-103a-2-5p_R+1	down	IRAK4:ENST00000550615	down
circRNA7429	up	hsa-miR-103a-2-5p_R+1	down	IRAK4:ENST00000550615	down
circRNA8846	up	hsa-miR-103a-2-5p_R+1	down	IRAK4:ENST00000550615	down
circRNA2692	up	hsa-miR-125a-5p	up	IRAK4:ENST00000550615	down
circRNA2692	up	hsa-miR-125b-5p	down	IRAK4:ENST00000550615	down
circRNA10508	up	hsa-miR-129-5p	down	IRAK4:ENST00000550615	down
circRNA3016	down	hsa-miR-129-5p	down	IRAK4:ENST00000550615	down
circRNA11886	up	hsa-miR-1537-5p	up	IRAK4:ENST00000550615	down
circRNA2692	up	hsa-miR-188-3p	down	IRAK4:ENST00000550615	down
circRNA7429	up	hsa-miR-2276-3p	down	IRAK4:ENST00000550615	down
circRNA10508	up	hsa-miR-30d-3p	down	IRAK4:ENST00000550615	down
circRNA2333	down	hsa-miR-3130-3p	up	IRAK4:ENST00000550615	down
circRNA13074	down	hsa-miR-424-3p	up	IRAK4:ENST00000550615	down
circRNA11459	up	hsa-miR-4659a-3p	up	IRAK4:ENST00000550615	down
circRNA1747	up	hsa-miR-4659a-3p	up	IRAK4:ENST00000550615	down
circRNA447	up	hsa-miR-4659a-3p	up	IRAK4:ENST00000550615	down
circRNA7429	up	hsa-miR-4659a-3p	up	IRAK4:ENST00000550615	down
circRNA8846	up	hsa-miR-4659a-3p	up	IRAK4:ENST00000550615	down
circRNA13950	up	hsa-miR-4659b-3p_L+1R-1	up	IRAK4:ENST00000550615	down
circRNA447	up	hsa-miR-4659b-3p_L+1R-1	up	IRAK4:ENST00000550615	down
circRNA7309	up	hsa-miR-4659b-3p_L+1R-1	up	IRAK4:ENST00000550615	down
circRNA7429	up	hsa-miR-4659b-3p_L+1R-1	up	IRAK4:ENST00000550615	down
circRNA8162	down	hsa-miR-4659b-3p_L+1R-1	up	IRAK4:ENST00000550615	down
circRNA8846	up	hsa-miR-4659b-3p_L+1R-1	up	IRAK4:ENST00000550615	down
circRNA12435	up	hsa-miR-4766-3p	up	IRAK4:ENST00000550615	down
circRNA13950	up	hsa-miR-6837-3p	down	IRAK4:ENST00000550615	down
circRNA8162	down	hsa-miR-6837-3p	down	IRAK4:ENST00000550615	down
circRNA11934	down	hsa-miR-758-3p	up	IRAK4:ENST00000550615	down
circRNA7429	up	hsa-miR-758-3p	up	IRAK4:ENST00000550615	down
circRNA7309	up	hsa-mir-4781-p3	down	IRAK4:ENST00000550615	down
circRNA702	down	hsa-mir-7852-p5	up	IRAK4:ENST00000550615	down
circRNA2692	up	mmu-miR-351-5p_R-2	up	IRAK4:ENST00000550615	down
circRNA10508	up	mmu-miR-497b_L-1	up	IRAK4:ENST00000550615	down
circRNA3016	down	mmu-miR-497b_L-1	up	IRAK4:ENST00000550615	down
circRNA2692	up	sha-miR-125a_R+2	down	IRAK4:ENST00000550615	down
circRNA7309	up	ssc-miR-451_L+4R-2	up	IRAK4:ENST00000550615	down
circRNA2013	up	hsa-miR-548ay-3p	up	TYK2:ENST00000529370	down
circRNA2013	up	hsa-mir-548aw-p3_1ss1TC	up	TYK2:ENST00000529370	down
circRNA13107	down	bta-mir-677-p3	up	STAT1:ENST00000415035	up
circRNA3680	down	bta-mir-677-p3	up	STAT1:ENST00000415035	up
circRNA8162	down	bta-mir-677-p3	up	STAT1:ENST00000415035	up
circRNA10508	up	efu-mir-9298-p3_1ss18CT	down	STAT1:ENST00000415035	up
circRNA10508	up	efu-mir-9298-p5_1ss18CT	down	STAT1:ENST00000415035	up
circRNA10508	up	hsa-miR-1249-5p	up	STAT1:ENST00000415035	up
circRNA10508	up	hsa-miR-127-5p_R+1	up	STAT1:ENST00000415035	up
circRNA8162	down	hsa-miR-127-5p_R+1	up	STAT1:ENST00000415035	up
circRNA10508	up	hsa-miR-1306-5p_R-1	up	STAT1:ENST00000415035	up
circRNA13186	up	hsa-miR-18a-3p_1ss23GA	up	STAT1:ENST00000415035	up
circRNA2692	up	hsa-miR-18a-3p_1ss23GA	up	STAT1:ENST00000415035	up
circRNA3680	down	hsa-miR-203a-3p_R+1	up	STAT1:ENST00000415035	up
circRNA2333	down	hsa-miR-3130-3p	up	STAT1:ENST00000415035	up
circRNA3069	down	hsa-miR-4446-5p_R+1	down	STAT1:ENST00000415035	up
circRNA8846	up	hsa-miR-4446-5p_R+1	down	STAT1:ENST00000415035	up
circRNA7429	up	hsa-miR-4799-5p	up	STAT1:ENST00000415035	up
circRNA2692	up	hsa-miR-6886-3p_R+2	down	STAT1:ENST00000415035	up
circRNA1067	up	hsa-miR-93-3p_R+1	up	STAT1:ENST00000415035	up
circRNA12435	up	hsa-miR-93-3p_R+1	up	STAT1:ENST00000415035	up
circRNA10508	up	ppy-miR-1976_L+1R+1	up	STAT1:ENST00000415035	up
circRNA2692	up	ppy-miR-1976_L+1R+1	up	STAT1:ENST00000415035	up
circRNA811	up	ppy-miR-1976_L+1R+1	up	STAT1:ENST00000415035	up
circRNA2692	up	bta-miR-2424_L-3	down	NFKB1:ENST00000505458	down
circRNA11459	up	cgr-miR-532-5p_R+2_1	down	NFKB1:ENST00000505458	down
circRNA2092	up	cgr-miR-532-5p_R+2_1	down	NFKB1:ENST00000505458	down
circRNA11459	up	cgr-miR-532-5p_R+2_2	down	NFKB1:ENST00000505458	down
circRNA2092	up	cgr-miR-532-5p_R+2_2	down	NFKB1:ENST00000505458	down
circRNA10508	up	hsa-miR-129-5p	down	NFKB1:ENST00000505458	down
circRNA3016	down	hsa-miR-129-5p	down	NFKB1:ENST00000505458	down
circRNA13950	up	hsa-miR-4676-5p_R+1	up	NFKB1:ENST00000505458	down
circRNA3016	down	hsa-miR-6741-3p	up	NFKB1:ENST00000505458	down
circRNA10508	up	PC-3p-15244_29	up	IRAK4:ENST00000431837	down
circRNA1747	up	PC-3p-15244_29	up	IRAK4:ENST00000431837	down
circRNA7309	up	PC-3p-15244_29	up	IRAK4:ENST00000431837	down
circRNA7429	up	PC-3p-18565_22	up	IRAK4:ENST00000431837	down
circRNA12827	up	PC-3p-31135_9	up	IRAK4:ENST00000431837	down
circRNA10508	up	PC-3p-32105_9	up	IRAK4:ENST00000431837	down
circRNA7309	up	PC-3p-38005_6	up	IRAK4:ENST00000431837	down
circRNA11934	down	PC-5p-19713_20	down	IRAK4:ENST00000431837	down
circRNA13186	up	PC-5p-31749_9	up	IRAK4:ENST00000431837	down
circRNA11934	down	cgr-miR-1285_L-4R-1_1ss15GA	up	IRAK4:ENST00000431837	down
circRNA2013	up	cgr-miR-1285_L-4R-1_1ss15GA	up	IRAK4:ENST00000431837	down
circRNA3453	up	cgr-miR-1285_L-4R-1_1ss15GA	up	IRAK4:ENST00000431837	down
circRNA11459	up	cgr-miR-532-5p_R+2_1	down	IRAK4:ENST00000431837	down
circRNA2092	up	cgr-miR-532-5p_R+2_1	down	IRAK4:ENST00000431837	down
circRNA11459	up	cgr-miR-532-5p_R+2_2	down	IRAK4:ENST00000431837	down
circRNA2092	up	cgr-miR-532-5p_R+2_2	down	IRAK4:ENST00000431837	down
circRNA10508	up	hsa-miR-127-5p_R+1	up	IRAK4:ENST00000431837	down
circRNA8162	down	hsa-miR-127-5p_R+1	up	IRAK4:ENST00000431837	down
circRNA10508	up	hsa-miR-129-5p	down	IRAK4:ENST00000431837	down
circRNA3016	down	hsa-miR-129-5p	down	IRAK4:ENST00000431837	down
circRNA10508	up	hsa-miR-1306-5p_R-1	up	IRAK4:ENST00000431837	down
circRNA12891	down	hsa-miR-146a-3p_L+1R-2	down	IRAK4:ENST00000431837	down
circRNA3016	down	hsa-miR-146a-3p_L+1R-2	down	IRAK4:ENST00000431837	down
circRNA2692	up	hsa-miR-146a-5p	down	IRAK4:ENST00000431837	down
circRNA2692	up	hsa-miR-146b-5p_R-1	down	IRAK4:ENST00000431837	down
circRNA2333	down	hsa-miR-186-3p_R-4	down	IRAK4:ENST00000431837	down
circRNA12435	up	hsa-miR-188-5p	up	IRAK4:ENST00000431837	down
circRNA13107	down	hsa-miR-19b-1-5p	up	IRAK4:ENST00000431837	down
circRNA13950	up	hsa-miR-19b-1-5p	up	IRAK4:ENST00000431837	down
circRNA5896	up	hsa-miR-221-5p	down	IRAK4:ENST00000431837	down
circRNA10508	up	hsa-miR-27a-3p	down	IRAK4:ENST00000431837	down
circRNA10508	up	hsa-miR-27b-3p	down	IRAK4:ENST00000431837	down
circRNA1067	up	hsa-miR-30c-2-3p	up	IRAK4:ENST00000431837	down
circRNA12827	up	hsa-miR-30c-2-3p	up	IRAK4:ENST00000431837	down
circRNA10508	up	hsa-miR-335-3p	down	IRAK4:ENST00000431837	down
circRNA11459	up	hsa-miR-335-3p	down	IRAK4:ENST00000431837	down
circRNA7429	up	hsa-miR-335-3p	down	IRAK4:ENST00000431837	down
circRNA3016	down	hsa-miR-380-5p_L+1R-1	up	IRAK4:ENST00000431837	down
circRNA3680	down	hsa-miR-380-5p_L+1R-1	up	IRAK4:ENST00000431837	down
circRNA8846	up	hsa-miR-382-3p_R+1	up	IRAK4:ENST00000431837	down
circRNA1067	up	hsa-miR-432-5p_1ss23GT	up	IRAK4:ENST00000431837	down
circRNA3016	down	hsa-miR-4433a-5p_R+2	down	IRAK4:ENST00000431837	down
circRNA10508	up	hsa-miR-449a	up	IRAK4:ENST00000431837	down
circRNA5896	up	hsa-miR-449a	up	IRAK4:ENST00000431837	down
circRNA811	up	hsa-miR-449a	up	IRAK4:ENST00000431837	down
circRNA11459	up	hsa-miR-4659a-3p	up	IRAK4:ENST00000431837	down
circRNA1747	up	hsa-miR-4659a-3p	up	IRAK4:ENST00000431837	down
circRNA447	up	hsa-miR-4659a-3p	up	IRAK4:ENST00000431837	down
circRNA7429	up	hsa-miR-4659a-3p	up	IRAK4:ENST00000431837	down
circRNA8846	up	hsa-miR-4659a-3p	up	IRAK4:ENST00000431837	down
circRNA2092	up	hsa-miR-543_R+1	up	IRAK4:ENST00000431837	down
circRNA11934	down	hsa-miR-545-3p	down	IRAK4:ENST00000431837	down
circRNA13074	down	hsa-miR-545-3p	down	IRAK4:ENST00000431837	down
circRNA3016	down	hsa-miR-5695_L-1R+1	down	IRAK4:ENST00000431837	down
circRNA13186	up	hsa-miR-619-5p_1ss1GA	down	IRAK4:ENST00000431837	down
circRNA8846	up	hsa-miR-619-5p_1ss1GA	down	IRAK4:ENST00000431837	down
circRNA8846	up	hsa-miR-627-5p_1ss2TG	up	IRAK4:ENST00000431837	down
circRNA7429	up	hsa-miR-643_L+2R-3	down	IRAK4:ENST00000431837	down
circRNA3016	down	hsa-miR-758-5p_L-1R+1	up	IRAK4:ENST00000431837	down
circRNA3680	down	hsa-miR-758-5p_L-1R+1	up	IRAK4:ENST00000431837	down
circRNA2692	up	hsa-miR-874-5p	down	IRAK4:ENST00000431837	down
circRNA11934	down	hsa-miR-876-3p_R-2	down	IRAK4:ENST00000431837	down
circRNA3016	down	hsa-miR-876-3p_R-2	down	IRAK4:ENST00000431837	down
circRNA3453	up	hsa-miR-939-5p_R+1	up	IRAK4:ENST00000431837	down
circRNA10508	up	hsa-miR-9985_R-1_1ss16CT	down	IRAK4:ENST00000431837	down
circRNA7309	up	hsa-mir-3202-1-p5	up	IRAK4:ENST00000431837	down
circRNA7309	up	hsa-mir-3202-2-p5	up	IRAK4:ENST00000431837	down
circRNA2092	up	mdo-miR-106-5p_R+2_1ss1AT	up	IRAK4:ENST00000431837	down
circRNA2692	up	mmu-miR-146a-5p_R+1	down	IRAK4:ENST00000431837	down
circRNA2692	up	mmu-miR-146a-5p_R+1_1ss22TA	down	IRAK4:ENST00000431837	down
circRNA2692	up	ocu-miR-146b-5p_R-1_1ss23GA	down	IRAK4:ENST00000431837	down
circRNA1067	up	ssc-mir-1285-p5_1ss18TC	up	IRAK4:ENST00000431837	down
circRNA2692	up	ssc-mir-1285-p5_1ss18TC	up	IRAK4:ENST00000431837	down

## Sheet: 线
Source	Target	Direction
circRNA7429	PC-3p-18565_22	Pos
circRNA13950	PC-5p-25681_13	Pos
circRNA2692	PC-5p-25681_13	Pos
circRNA3453	PC-5p-25681_13	Pos
circRNA11459	bta-miR-150	Neg
circRNA11934	bta-miR-150	Pos
circRNA13950	bta-miR-150	Neg
circRNA2692	bta-miR-2424_L-3	Neg
circRNA2013	hsa-miR-1255a	Pos
circRNA10508	hsa-miR-127-5p_R+1	Pos
circRNA8162	hsa-miR-127-5p_R+1	Neg
circRNA3680	hsa-miR-148b-3p	Pos
circRNA2333	hsa-miR-186-3p_R-4	Pos
circRNA11934	hsa-miR-29b-1-5p	Neg
circRNA3016	hsa-miR-29b-1-5p	Neg
circRNA7309	hsa-miR-29b-1-5p	Pos
circRNA11934	hsa-miR-29b-2-5p_R+1	Neg
circRNA2092	hsa-miR-29b-2-5p_R+1	Pos
circRNA10508	hsa-miR-301b-3p	Neg
circRNA11886	hsa-miR-3140-3p_R-1	Neg
circRNA447	hsa-miR-3140-3p_R-1	Neg
circRNA450	hsa-miR-3140-3p_R-1	Neg
circRNA702	hsa-miR-3140-3p_R-1	Pos
circRNA7429	hsa-miR-382-5p	Pos
circRNA1067	hsa-miR-432-5p_1ss23GT	Pos
circRNA11459	hsa-miR-433-3p	Pos
circRNA3069	hsa-miR-4446-5p_R+1	Pos
circRNA8846	hsa-miR-4446-5p_R+1	Neg
circRNA11459	hsa-miR-4659a-3p	Pos
circRNA1747	hsa-miR-4659a-3p	Pos
circRNA447	hsa-miR-4659a-3p	Pos
circRNA7429	hsa-miR-4659a-3p	Pos
circRNA8846	hsa-miR-4659a-3p	Pos
circRNA13950	hsa-miR-4659b-3p_L+1R-1	Pos
circRNA447	hsa-miR-4659b-3p_L+1R-1	Pos
circRNA7309	hsa-miR-4659b-3p_L+1R-1	Pos
circRNA7429	hsa-miR-4659b-3p_L+1R-1	Pos
circRNA8162	hsa-miR-4659b-3p_L+1R-1	Neg
circRNA8846	hsa-miR-4659b-3p_L+1R-1	Pos
circRNA12827	hsa-miR-4676-3p_R-1	Pos
circRNA13950	hsa-miR-4676-3p_R-1	Pos
circRNA2092	hsa-miR-497-5p	Pos
circRNA3453	hsa-miR-497-5p	Pos
circRNA7429	hsa-miR-548ab	Pos
circRNA7429	hsa-miR-548ag_1ss4GA	Pos
circRNA7429	hsa-miR-548aq-5p	Neg
circRNA7429	hsa-miR-548au-5p_R+1	Neg
circRNA13186	hsa-miR-619-5p_1ss1GA	Neg
circRNA8846	hsa-miR-619-5p_1ss1GA	Neg
circRNA11459	hsa-miR-629-3p	Pos
circRNA10508	hsa-miR-6513-3p_R+1	Neg
circRNA11459	hsa-miR-660-3p_R+1	Pos
circRNA8162	hsa-miR-6818-5p	Pos
circRNA11934	hsa-miR-758-3p	Neg
circRNA7429	hsa-miR-758-3p	Pos
circRNA11934	hsa-miR-943_L+1R+1	Neg
circRNA447	hsa-miR-943_L+1R+1	Pos
circRNA450	hsa-miR-943_L+1R+1	Pos
circRNA5896	hsa-miR-943_L+1R+1	Pos
circRNA10508	mmu-miR-101c_L+1R+2	Pos
circRNA10508	mmu-mir-6240-p5_2ss1GN23GT	Pos
circRNA2013	mmu-mir-6240-p5_2ss1GN23GT	Pos
circRNA10508	ppy-miR-1976_L+1R+1	Pos
circRNA2692	ppy-miR-1976_L+1R+1	Pos
circRNA811	ppy-miR-1976_L+1R+1	Pos
circRNA10508	efu-mir-9298-p3_1ss18CT	Neg
circRNA10508	efu-mir-9298-p5_1ss18CT	Neg
circRNA1747	hsa-miR-103a-1-5p	Pos
circRNA2692	hsa-miR-103a-1-5p	Pos
circRNA450	hsa-miR-103a-1-5p	Pos
circRNA7429	hsa-miR-103a-1-5p	Pos
circRNA8846	hsa-miR-103a-1-5p	Pos
circRNA1747	hsa-miR-103a-2-5p_R+1	Neg
circRNA2692	hsa-miR-103a-2-5p_R+1	Neg
circRNA450	hsa-miR-103a-2-5p_R+1	Neg
circRNA7429	hsa-miR-103a-2-5p_R+1	Neg
circRNA8846	hsa-miR-103a-2-5p_R+1	Neg
circRNA7429	hsa-miR-214-3p	Pos
circRNA12827	hsa-let-7e-5p	Pos
circRNA10508	hsa-miR-1249-5p	Pos
circRNA2692	hsa-miR-125a-5p	Pos
circRNA2092	hsa-miR-125b-2-3p_L-2R+1	Neg
circRNA2692	hsa-miR-125b-5p	Neg
circRNA3680	hsa-miR-3187-3p_R+1	Neg
circRNA2692	hsa-miR-4662b	Neg
circRNA7429	hsa-miR-4662b	Neg
circRNA10508	hsa-miR-6515-5p	Pos
circRNA12827	mmu-let-7c-5p_R+2	Pos
circRNA2692	mmu-miR-351-5p_R-2	Pos
circRNA2692	sha-miR-125a_R+2	Neg
circRNA2013	PC-3p-9143_61	Neg
circRNA2092	PC-5p-38995_6	Pos
circRNA2013	bta-miR-2285bm_1ss14GA	Neg
circRNA8846	cgr-miR-1260_R+2_1	Pos
circRNA8846	cgr-miR-1260_R+2_2	Pos
circRNA8846	cgr-miR-1260_R+2_3	Pos
circRNA8846	cgr-miR-1260_R+2_4	Pos
circRNA8846	cgr-miR-1260_R+2_5	Pos
circRNA8846	cgr-miR-1260_R+2_6	Pos
circRNA2092	hsa-miR-103a-3p	Pos
circRNA11886	hsa-miR-1270	Pos
circRNA7429	hsa-miR-1270	Pos
circRNA12827	hsa-miR-1343-3p	Pos
circRNA13950	hsa-miR-1343-3p	Pos
circRNA3680	hsa-miR-1343-3p	Neg
circRNA12891	hsa-miR-146a-3p_L+1R-2	Pos
circRNA3016	hsa-miR-146a-3p_L+1R-2	Pos
circRNA2692	hsa-miR-188-3p	Neg
circRNA13186	hsa-miR-18a-3p_1ss23GA	Pos
circRNA2692	hsa-miR-18a-3p_1ss23GA	Pos
circRNA12827	hsa-miR-193a-3p	Neg
circRNA12827	hsa-miR-193b-3p	Neg
circRNA13950	hsa-miR-211-5p	Neg
circRNA8846	hsa-miR-211-5p	Neg
circRNA1067	hsa-miR-3605-3p	Pos
circRNA13950	hsa-miR-363-3p_R+1	Neg
circRNA8162	hsa-miR-3677-3p	Pos
circRNA12891	hsa-miR-4433b-3p_L+1_1ss9GC	Neg
circRNA7429	hsa-miR-4738-3p_L-1	Neg
circRNA13107	hsa-miR-4804-5p_L+1R-1_1ss7CG	Neg
circRNA13186	hsa-miR-4804-5p_L+1R-1_1ss7CG	Pos
circRNA7309	hsa-miR-4804-5p_L+1R-1_1ss7CG	Pos
circRNA8162	hsa-miR-491-5p	Neg
circRNA10508	hsa-miR-493-5p	Pos
circRNA13950	hsa-miR-493-5p	Pos
circRNA2333	hsa-miR-493-5p	Neg
circRNA10508	hsa-miR-5193	Pos
circRNA13950	hsa-miR-5193	Pos
circRNA3016	hsa-miR-5193	Neg
circRNA3453	hsa-miR-939-5p_R+1	Pos
circRNA12891	hsa-mir-3166-p5	Neg
circRNA13186	hsa-mir-3166-p5	Pos
circRNA5896	hsa-mir-3166-p5	Pos
circRNA8846	hsa-mir-7851-p5_1ss12TG	Pos
circRNA2092	mdo-miR-106-5p_R+2_1ss1AT	Pos
circRNA10508	mmu-miR-497b_L-1	Pos
circRNA3016	mmu-miR-497b_L-1	Neg
circRNA2013	mmu-mir-7650-p5_1ss16CT	Neg
circRNA2692	mmu-mir-7650-p5_1ss16CT	Neg
circRNA3680	ptr-mir-4667-p3_1ss22GT	Neg
circRNA10508	PC-3p-32105_9	Pos
circRNA10508	PC-5p-46446_5	Neg
circRNA10508	hsa-miR-26b-3p_R+1	Neg
circRNA11934	hsa-miR-26b-3p_R+1	Pos
circRNA12435	hsa-miR-409-3p	Pos
circRNA13950	hsa-miR-874-3p	Neg
circRNA10508	PC-3p-37309_7	Pos
circRNA2692	hsa-miR-2110_R+1	Pos
circRNA13950	hsa-miR-377-3p	Pos
circRNA12435	hsa-miR-5006-3p_R+1	Neg
circRNA8846	hsa-miR-5006-3p_R+1	Neg
circRNA13521	hsa-miR-7851-3p	Neg
circRNA2092	cja-miR-9933_L-5_1ss12AT	Neg
circRNA10508	hsa-miR-181c-5p_R+1	Neg
circRNA1067	hsa-miR-30c-2-3p	Pos
circRNA12827	hsa-miR-30c-2-3p	Pos
circRNA13521	hsa-miR-3173-5p	Pos
circRNA10508	hsa-miR-6501-5p_R+1	Pos
circRNA7429	hsa-miR-6501-5p_R+1	Pos
circRNA13521	hsa-miR-6799-3p_R-1	Pos
circRNA702	hsa-miR-6859-5p	Neg
circRNA2692	hsa-miR-874-5p	Neg
circRNA7309	hsa-mir-3202-1-p5	Pos
circRNA7309	hsa-mir-3202-2-p5	Pos
circRNA10508	mdo-miR-181b-5p_R+3	Pos
circRNA13186	mdo-miR-22-3p_R+1	Pos
circRNA13186	mmu-miR-3084-3p_R+4_1ss2TG	Pos
circRNA3069	mmu-mir-6240-p5_1ss22GT	Neg
circRNA2692	hsa-miR-146a-5p	Neg
circRNA2692	hsa-miR-146b-5p_R-1	Neg
circRNA10508	hsa-miR-27a-3p	Neg
circRNA10508	hsa-miR-27b-3p	Neg
circRNA2333	hsa-miR-3130-3p	Neg
circRNA10508	hsa-miR-9985_R-1_1ss16CT	Neg
circRNA2692	mmu-miR-146a-5p_R+1	Neg
circRNA2692	mmu-miR-146a-5p_R+1_1ss22TA	Neg
circRNA2692	ocu-miR-146b-5p_R-1_1ss23GA	Neg
circRNA12827	PC-3p-31135_9	Pos
circRNA7309	bta-miR-199c_L-1R+3	Pos
circRNA10508	hsa-miR-129-5p	Neg
circRNA3016	hsa-miR-129-5p	Pos
circRNA11886	hsa-miR-1537-5p	Pos
circRNA7429	hsa-miR-2276-3p	Neg
circRNA10508	hsa-miR-30d-3p	Neg
circRNA13074	hsa-miR-424-3p	Neg
circRNA12435	hsa-miR-4766-3p	Pos
circRNA13950	hsa-miR-6837-3p	Neg
circRNA8162	hsa-miR-6837-3p	Pos
circRNA7309	hsa-mir-4781-p3	Neg
circRNA702	hsa-mir-7852-p5	Neg
circRNA7309	ssc-miR-451_L+4R-2	Pos
circRNA2013	hsa-miR-548ay-3p	Pos
circRNA2013	hsa-mir-548aw-p3_1ss1TC	Pos
circRNA13107	bta-mir-677-p3	Neg
circRNA3680	bta-mir-677-p3	Neg
circRNA8162	bta-mir-677-p3	Neg
circRNA10508	hsa-miR-1306-5p_R-1	Pos
circRNA3680	hsa-miR-203a-3p_R+1	Neg
circRNA7429	hsa-miR-4799-5p	Pos
circRNA2692	hsa-miR-6886-3p_R+2	Neg
circRNA1067	hsa-miR-93-3p_R+1	Pos
circRNA12435	hsa-miR-93-3p_R+1	Pos
circRNA11459	cgr-miR-532-5p_R+2_1	Neg
circRNA2092	cgr-miR-532-5p_R+2_1	Neg
circRNA11459	cgr-miR-532-5p_R+2_2	Neg
circRNA2092	cgr-miR-532-5p_R+2_2	Neg
circRNA13950	hsa-miR-4676-5p_R+1	Pos
circRNA3016	hsa-miR-6741-3p	Neg
circRNA10508	PC-3p-15244_29	Pos
circRNA1747	PC-3p-15244_29	Pos
circRNA7309	PC-3p-15244_29	Pos
circRNA7309	PC-3p-38005_6	Pos
circRNA11934	PC-5p-19713_20	Pos
circRNA13186	PC-5p-31749_9	Pos
circRNA11934	cgr-miR-1285_L-4R-1_1ss15GA	Neg
circRNA2013	cgr-miR-1285_L-4R-1_1ss15GA	Pos
circRNA3453	cgr-miR-1285_L-4R-1_1ss15GA	Pos
circRNA12435	hsa-miR-188-5p	Pos
circRNA13107	hsa-miR-19b-1-5p	Neg
circRNA13950	hsa-miR-19b-1-5p	Pos
circRNA5896	hsa-miR-221-5p	Neg
circRNA10508	hsa-miR-335-3p	Neg
circRNA11459	hsa-miR-335-3p	Neg
circRNA7429	hsa-miR-335-3p	Neg
circRNA3016	hsa-miR-380-5p_L+1R-1	Neg
circRNA3680	hsa-miR-380-5p_L+1R-1	Neg
circRNA8846	hsa-miR-382-3p_R+1	Pos
circRNA3016	hsa-miR-4433a-5p_R+2	Pos
circRNA10508	hsa-miR-449a	Pos
circRNA5896	hsa-miR-449a	Pos
circRNA811	hsa-miR-449a	Pos
circRNA2092	hsa-miR-543_R+1	Pos
circRNA11934	hsa-miR-545-3p	Pos
circRNA13074	hsa-miR-545-3p	Pos
circRNA3016	hsa-miR-5695_L-1R+1	Pos
circRNA8846	hsa-miR-627-5p_1ss2TG	Pos
circRNA7429	hsa-miR-643_L+2R-3	Neg
circRNA3016	hsa-miR-758-5p_L-1R+1	Neg
circRNA3680	hsa-miR-758-5p_L-1R+1	Neg
circRNA11934	hsa-miR-876-3p_R-2	Pos
circRNA3016	hsa-miR-876-3p_R-2	Pos
circRNA1067	ssc-mir-1285-p5_1ss18TC	Pos
circRNA2692	ssc-mir-1285-p5_1ss18TC	Pos
PC-3p-18565_22	TLR7:ENST00000380659	Pos
PC-5p-25681_13	TLR7:ENST00000380659	Pos
bta-miR-150	TLR7:ENST00000380659	Neg
bta-miR-2424_L-3	TLR7:ENST00000380659	Neg
hsa-miR-1255a	TLR7:ENST00000380659	Pos
hsa-miR-127-5p_R+1	TLR7:ENST00000380659	Pos
hsa-miR-148b-3p	TLR7:ENST00000380659	Neg
hsa-miR-186-3p_R-4	TLR7:ENST00000380659	Neg
hsa-miR-29b-1-5p	TLR7:ENST00000380659	Pos
hsa-miR-29b-2-5p_R+1	TLR7:ENST00000380659	Pos
hsa-miR-301b-3p	TLR7:ENST00000380659	Neg
hsa-miR-3140-3p_R-1	TLR7:ENST00000380659	Neg
hsa-miR-382-5p	TLR7:ENST00000380659	Pos
hsa-miR-432-5p_1ss23GT	TLR7:ENST00000380659	Pos
hsa-miR-433-3p	TLR7:ENST00000380659	Pos
hsa-miR-4446-5p_R+1	TLR7:ENST00000380659	Neg
hsa-miR-4659a-3p	TLR7:ENST00000380659	Pos
hsa-miR-4659b-3p_L+1R-1	TLR7:ENST00000380659	Pos
hsa-miR-4676-3p_R-1	TLR7:ENST00000380659	Pos
hsa-miR-497-5p	TLR7:ENST00000380659	Pos
hsa-miR-548ab	TLR7:ENST00000380659	Pos
hsa-miR-548ag_1ss4GA	TLR7:ENST00000380659	Pos
hsa-miR-548aq-5p	TLR7:ENST00000380659	Neg
hsa-miR-548au-5p_R+1	TLR7:ENST00000380659	Neg
hsa-miR-619-5p_1ss1GA	TLR7:ENST00000380659	Neg
hsa-miR-629-3p	TLR7:ENST00000380659	Pos
hsa-miR-6513-3p_R+1	TLR7:ENST00000380659	Neg
hsa-miR-660-3p_R+1	TLR7:ENST00000380659	Pos
hsa-miR-6818-5p	TLR7:ENST00000380659	Neg
hsa-miR-758-3p	TLR7:ENST00000380659	Pos
hsa-miR-943_L+1R+1	TLR7:ENST00000380659	Pos
mmu-miR-101c_L+1R+2	TLR7:ENST00000380659	Pos
mmu-mir-6240-p5_2ss1GN23GT	TLR7:ENST00000380659	Pos
ppy-miR-1976_L+1R+1	TLR7:ENST00000380659	Pos
efu-mir-9298-p3_1ss18CT	C1QA:ENST00000374642	Neg
efu-mir-9298-p5_1ss18CT	C1QA:ENST00000374642	Neg
hsa-miR-103a-1-5p	C1QA:ENST00000374642	Pos
hsa-miR-103a-2-5p_R+1	C1QA:ENST00000374642	Neg
hsa-miR-214-3p	C1QA:ENST00000374642	Pos
hsa-let-7e-5p	C2:ENST00000299367	Pos
hsa-miR-1249-5p	C2:ENST00000299367	Pos
hsa-miR-125a-5p	C2:ENST00000299367	Pos
hsa-miR-125b-2-3p_L-2R+1	C2:ENST00000299367	Neg
hsa-miR-125b-5p	C2:ENST00000299367	Neg
hsa-miR-3187-3p_R+1	C2:ENST00000299367	Pos
hsa-miR-4662b	C2:ENST00000299367	Neg
hsa-miR-6515-5p	C2:ENST00000299367	Pos
mmu-let-7c-5p_R+2	C2:ENST00000299367	Pos
mmu-miR-351-5p_R-2	C2:ENST00000299367	Pos
sha-miR-125a_R+2	C2:ENST00000299367	Neg
PC-3p-18565_22	IFNAR2:ENST00000404220	Pos
PC-3p-9143_61	IFNAR2:ENST00000404220	Neg
PC-5p-38995_6	IFNAR2:ENST00000404220	Pos
bta-miR-2285bm_1ss14GA	IFNAR2:ENST00000404220	Neg
cgr-miR-1260_R+2_1	IFNAR2:ENST00000404220	Pos
cgr-miR-1260_R+2_2	IFNAR2:ENST00000404220	Pos
cgr-miR-1260_R+2_3	IFNAR2:ENST00000404220	Pos
cgr-miR-1260_R+2_4	IFNAR2:ENST00000404220	Pos
cgr-miR-1260_R+2_5	IFNAR2:ENST00000404220	Pos
cgr-miR-1260_R+2_6	IFNAR2:ENST00000404220	Pos
efu-mir-9298-p3_1ss18CT	IFNAR2:ENST00000404220	Neg
efu-mir-9298-p5_1ss18CT	IFNAR2:ENST00000404220	Neg
hsa-miR-103a-3p	IFNAR2:ENST00000404220	Pos
hsa-miR-125a-5p	IFNAR2:ENST00000404220	Pos
hsa-miR-125b-5p	IFNAR2:ENST00000404220	Neg
hsa-miR-1270	IFNAR2:ENST00000404220	Pos
hsa-miR-1343-3p	IFNAR2:ENST00000404220	Pos
hsa-miR-146a-3p_L+1R-2	IFNAR2:ENST00000404220	Neg
hsa-miR-186-3p_R-4	IFNAR2:ENST00000404220	Neg
hsa-miR-188-3p	IFNAR2:ENST00000404220	Neg
hsa-miR-18a-3p_1ss23GA	IFNAR2:ENST00000404220	Pos
hsa-miR-193a-3p	IFNAR2:ENST00000404220	Neg
hsa-miR-193b-3p	IFNAR2:ENST00000404220	Neg
hsa-miR-211-5p	IFNAR2:ENST00000404220	Neg
hsa-miR-3605-3p	IFNAR2:ENST00000404220	Pos
hsa-miR-363-3p_R+1	IFNAR2:ENST00000404220	Neg
hsa-miR-3677-3p	IFNAR2:ENST00000404220	Neg
hsa-miR-432-5p_1ss23GT	IFNAR2:ENST00000404220	Pos
hsa-miR-4433b-3p_L+1_1ss9GC	IFNAR2:ENST00000404220	Pos
hsa-miR-4659a-3p	IFNAR2:ENST00000404220	Pos
hsa-miR-4659b-3p_L+1R-1	IFNAR2:ENST00000404220	Pos
hsa-miR-4676-3p_R-1	IFNAR2:ENST00000404220	Pos
hsa-miR-4738-3p_L-1	IFNAR2:ENST00000404220	Neg
hsa-miR-4804-5p_L+1R-1_1ss7CG	IFNAR2:ENST00000404220	Pos
hsa-miR-491-5p	IFNAR2:ENST00000404220	Pos
hsa-miR-493-5p	IFNAR2:ENST00000404220	Pos
hsa-miR-5193	IFNAR2:ENST00000404220	Pos
hsa-miR-619-5p_1ss1GA	IFNAR2:ENST00000404220	Neg
hsa-miR-939-5p_R+1	IFNAR2:ENST00000404220	Pos
hsa-mir-3166-p5	IFNAR2:ENST00000404220	Pos
hsa-mir-7851-p5_1ss12TG	IFNAR2:ENST00000404220	Pos
mdo-miR-106-5p_R+2_1ss1AT	IFNAR2:ENST00000404220	Pos
mmu-miR-351-5p_R-2	IFNAR2:ENST00000404220	Pos
mmu-miR-497b_L-1	IFNAR2:ENST00000404220	Pos
mmu-mir-7650-p5_1ss16CT	IFNAR2:ENST00000404220	Neg
ppy-miR-1976_L+1R+1	IFNAR2:ENST00000404220	Pos
ptr-mir-4667-p3_1ss22GT	IFNAR2:ENST00000404220	Pos
sha-miR-125a_R+2	IFNAR2:ENST00000404220	Neg
PC-3p-32105_9	STAT2:ENST00000557235	Pos
PC-5p-46446_5	STAT2:ENST00000557235	Neg
hsa-miR-125a-5p	STAT2:ENST00000557235	Pos
hsa-miR-125b-5p	STAT2:ENST00000557235	Neg
hsa-miR-18a-3p_1ss23GA	STAT2:ENST00000557235	Pos
hsa-miR-214-3p	STAT2:ENST00000557235	Pos
hsa-miR-26b-3p_R+1	STAT2:ENST00000557235	Neg
hsa-miR-409-3p	STAT2:ENST00000557235	Pos
hsa-miR-432-5p_1ss23GT	STAT2:ENST00000557235	Pos
hsa-miR-874-3p	STAT2:ENST00000557235	Neg
mmu-miR-351-5p_R-2	STAT2:ENST00000557235	Pos
sha-miR-125a_R+2	STAT2:ENST00000557235	Neg
PC-3p-37309_7	IFNAR2:ENST00000342136	Neg
PC-5p-46446_5	IFNAR2:ENST00000342136	Pos
cgr-miR-1260_R+2_1	IFNAR2:ENST00000342136	Neg
cgr-miR-1260_R+2_2	IFNAR2:ENST00000342136	Neg
cgr-miR-1260_R+2_3	IFNAR2:ENST00000342136	Neg
cgr-miR-1260_R+2_4	IFNAR2:ENST00000342136	Neg
cgr-miR-1260_R+2_5	IFNAR2:ENST00000342136	Neg
cgr-miR-1260_R+2_6	IFNAR2:ENST00000342136	Neg
hsa-miR-146a-3p_L+1R-2	IFNAR2:ENST00000342136	Pos
hsa-miR-2110_R+1	IFNAR2:ENST00000342136	Neg
hsa-miR-377-3p	IFNAR2:ENST00000342136	Neg
hsa-miR-432-5p_1ss23GT	IFNAR2:ENST00000342136	Neg
hsa-miR-4433b-3p_L+1_1ss9GC	IFNAR2:ENST00000342136	Neg
hsa-miR-4446-5p_R+1	IFNAR2:ENST00000342136	Pos
hsa-miR-491-5p	IFNAR2:ENST00000342136	Neg
hsa-miR-5006-3p_R+1	IFNAR2:ENST00000342136	Pos
hsa-miR-5193	IFNAR2:ENST00000342136	Neg
hsa-miR-7851-3p	IFNAR2:ENST00000342136	Pos
hsa-miR-939-5p_R+1	IFNAR2:ENST00000342136	Neg
hsa-mir-7851-p5_1ss12TG	IFNAR2:ENST00000342136	Neg
mdo-miR-106-5p_R+2_1ss1AT	IFNAR2:ENST00000342136	Neg
mmu-miR-497b_L-1	IFNAR2:ENST00000342136	Neg
cja-miR-9933_L-5_1ss12AT	IRF5:ENST00000473745	Pos
hsa-miR-181c-5p_R+1	IRF5:ENST00000473745	Pos
hsa-miR-30c-2-3p	IRF5:ENST00000473745	Neg
hsa-miR-3140-3p_R-1	IRF5:ENST00000473745	Pos
hsa-miR-3173-5p	IRF5:ENST00000473745	Neg
hsa-miR-629-3p	IRF5:ENST00000473745	Neg
hsa-miR-6501-5p_R+1	IRF5:ENST00000473745	Neg
hsa-miR-6799-3p_R-1	IRF5:ENST00000473745	Neg
hsa-miR-6859-5p	IRF5:ENST00000473745	Neg
hsa-miR-874-3p	IRF5:ENST00000473745	Pos
hsa-miR-874-5p	IRF5:ENST00000473745	Pos
hsa-mir-3166-p5	IRF5:ENST00000473745	Neg
hsa-mir-3202-1-p5	IRF5:ENST00000473745	Neg
hsa-mir-3202-2-p5	IRF5:ENST00000473745	Neg
mdo-miR-181b-5p_R+3	IRF5:ENST00000473745	Neg
mdo-miR-22-3p_R+1	IRF5:ENST00000473745	Neg
mmu-miR-3084-3p_R+4_1ss2TG	IRF5:ENST00000473745	Neg
mmu-mir-6240-p5_1ss22GT	IRF5:ENST00000473745	Neg
mmu-mir-6240-p5_2ss1GN23GT	IRF5:ENST00000473745	Neg
cja-miR-9933_L-5_1ss12AT	IRF5:ENST00000402030	Neg
efu-mir-9298-p3_1ss18CT	IRF5:ENST00000402030	Neg
efu-mir-9298-p5_1ss18CT	IRF5:ENST00000402030	Neg
hsa-miR-146a-5p	IRF5:ENST00000402030	Neg
hsa-miR-146b-5p_R-1	IRF5:ENST00000402030	Neg
hsa-miR-181c-5p_R+1	IRF5:ENST00000402030	Neg
hsa-miR-18a-3p_1ss23GA	IRF5:ENST00000402030	Pos
hsa-miR-27a-3p	IRF5:ENST00000402030	Neg
hsa-miR-27b-3p	IRF5:ENST00000402030	Neg
hsa-miR-30c-2-3p	IRF5:ENST00000402030	Pos
hsa-miR-3130-3p	IRF5:ENST00000402030	Pos
hsa-miR-3140-3p_R-1	IRF5:ENST00000402030	Neg
hsa-miR-3173-5p	IRF5:ENST00000402030	Pos
hsa-miR-629-3p	IRF5:ENST00000402030	Pos
hsa-miR-6501-5p_R+1	IRF5:ENST00000402030	Pos
hsa-miR-660-3p_R+1	IRF5:ENST00000402030	Pos
hsa-miR-6799-3p_R-1	IRF5:ENST00000402030	Pos
hsa-miR-6859-5p	IRF5:ENST00000402030	Pos
hsa-miR-874-3p	IRF5:ENST00000402030	Neg
hsa-miR-874-5p	IRF5:ENST00000402030	Neg
hsa-miR-9985_R-1_1ss16CT	IRF5:ENST00000402030	Neg
hsa-mir-3166-p5	IRF5:ENST00000402030	Pos
hsa-mir-3202-1-p5	IRF5:ENST00000402030	Pos
hsa-mir-3202-2-p5	IRF5:ENST00000402030	Pos
mdo-miR-181b-5p_R+3	IRF5:ENST00000402030	Pos
mdo-miR-22-3p_R+1	IRF5:ENST00000402030	Pos
mmu-miR-146a-5p_R+1	IRF5:ENST00000402030	Neg
mmu-miR-146a-5p_R+1_1ss22TA	IRF5:ENST00000402030	Neg
mmu-miR-3084-3p_R+4_1ss2TG	IRF5:ENST00000402030	Pos
mmu-mir-6240-p5_1ss22GT	IRF5:ENST00000402030	Pos
mmu-mir-6240-p5_2ss1GN23GT	IRF5:ENST00000402030	Pos
ocu-miR-146b-5p_R-1_1ss23GA	IRF5:ENST00000402030	Neg
PC-3p-31135_9	IRAK4:ENST00000550615	Neg
PC-3p-37309_7	IRAK4:ENST00000550615	Neg
bta-miR-199c_L-1R+3	IRAK4:ENST00000550615	Neg
hsa-miR-103a-1-5p	IRAK4:ENST00000550615	Neg
hsa-miR-103a-2-5p_R+1	IRAK4:ENST00000550615	Pos
hsa-miR-125a-5p	IRAK4:ENST00000550615	Neg
hsa-miR-125b-5p	IRAK4:ENST00000550615	Pos
hsa-miR-129-5p	IRAK4:ENST00000550615	Pos
hsa-miR-1537-5p	IRAK4:ENST00000550615	Neg
hsa-miR-188-3p	IRAK4:ENST00000550615	Pos
hsa-miR-2276-3p	IRAK4:ENST00000550615	Pos
hsa-miR-30d-3p	IRAK4:ENST00000550615	Pos
hsa-miR-3130-3p	IRAK4:ENST00000550615	Neg
hsa-miR-424-3p	IRAK4:ENST00000550615	Neg
hsa-miR-4659a-3p	IRAK4:ENST00000550615	Neg
hsa-miR-4659b-3p_L+1R-1	IRAK4:ENST00000550615	Neg
hsa-miR-4766-3p	IRAK4:ENST00000550615	Neg
hsa-miR-6837-3p	IRAK4:ENST00000550615	Pos
hsa-miR-758-3p	IRAK4:ENST00000550615	Neg
hsa-mir-4781-p3	IRAK4:ENST00000550615	Pos
hsa-mir-7852-p5	IRAK4:ENST00000550615	Neg
mmu-miR-351-5p_R-2	IRAK4:ENST00000550615	Neg
mmu-miR-497b_L-1	IRAK4:ENST00000550615	Neg
sha-miR-125a_R+2	IRAK4:ENST00000550615	Pos
ssc-miR-451_L+4R-2	IRAK4:ENST00000550615	Neg
hsa-miR-548ay-3p	TYK2:ENST00000529370	Neg
hsa-mir-548aw-p3_1ss1TC	TYK2:ENST00000529370	Neg
bta-mir-677-p3	STAT1:ENST00000415035	Pos
efu-mir-9298-p3_1ss18CT	STAT1:ENST00000415035	Neg
efu-mir-9298-p5_1ss18CT	STAT1:ENST00000415035	Neg
hsa-miR-1249-5p	STAT1:ENST00000415035	Pos
hsa-miR-127-5p_R+1	STAT1:ENST00000415035	Pos
hsa-miR-1306-5p_R-1	STAT1:ENST00000415035	Pos
hsa-miR-18a-3p_1ss23GA	STAT1:ENST00000415035	Pos
hsa-miR-203a-3p_R+1	STAT1:ENST00000415035	Pos
hsa-miR-3130-3p	STAT1:ENST00000415035	Pos
hsa-miR-4446-5p_R+1	STAT1:ENST00000415035	Neg
hsa-miR-4799-5p	STAT1:ENST00000415035	Pos
hsa-miR-6886-3p_R+2	STAT1:ENST00000415035	Neg
hsa-miR-93-3p_R+1	STAT1:ENST00000415035	Pos
ppy-miR-1976_L+1R+1	STAT1:ENST00000415035	Pos
bta-miR-2424_L-3	NFKB1:ENST00000505458	Pos
cgr-miR-532-5p_R+2_1	NFKB1:ENST00000505458	Pos
cgr-miR-532-5p_R+2_2	NFKB1:ENST00000505458	Pos
hsa-miR-129-5p	NFKB1:ENST00000505458	Pos
hsa-miR-4676-5p_R+1	NFKB1:ENST00000505458	Neg
hsa-miR-6741-3p	NFKB1:ENST00000505458	Neg
PC-3p-15244_29	IRAK4:ENST00000431837	Neg
PC-3p-18565_22	IRAK4:ENST00000431837	Neg
PC-3p-31135_9	IRAK4:ENST00000431837	Neg
PC-3p-32105_9	IRAK4:ENST00000431837	Neg
PC-3p-38005_6	IRAK4:ENST00000431837	Neg
PC-5p-19713_20	IRAK4:ENST00000431837	Pos
PC-5p-31749_9	IRAK4:ENST00000431837	Neg
cgr-miR-1285_L-4R-1_1ss15GA	IRAK4:ENST00000431837	Neg
cgr-miR-532-5p_R+2_1	IRAK4:ENST00000431837	Pos
cgr-miR-532-5p_R+2_2	IRAK4:ENST00000431837	Pos
hsa-miR-127-5p_R+1	IRAK4:ENST00000431837	Neg
hsa-miR-129-5p	IRAK4:ENST00000431837	Pos
hsa-miR-1306-5p_R-1	IRAK4:ENST00000431837	Neg
hsa-miR-146a-3p_L+1R-2	IRAK4:ENST00000431837	Pos
hsa-miR-146a-5p	IRAK4:ENST00000431837	Pos
hsa-miR-146b-5p_R-1	IRAK4:ENST00000431837	Pos
hsa-miR-186-3p_R-4	IRAK4:ENST00000431837	Pos
hsa-miR-188-5p	IRAK4:ENST00000431837	Neg
hsa-miR-19b-1-5p	IRAK4:ENST00000431837	Neg
hsa-miR-221-5p	IRAK4:ENST00000431837	Pos
hsa-miR-27a-3p	IRAK4:ENST00000431837	Pos
hsa-miR-27b-3p	IRAK4:ENST00000431837	Pos
hsa-miR-30c-2-3p	IRAK4:ENST00000431837	Neg
hsa-miR-335-3p	IRAK4:ENST00000431837	Pos
hsa-miR-380-5p_L+1R-1	IRAK4:ENST00000431837	Neg
hsa-miR-382-3p_R+1	IRAK4:ENST00000431837	Neg
hsa-miR-432-5p_1ss23GT	IRAK4:ENST00000431837	Neg
hsa-miR-4433a-5p_R+2	IRAK4:ENST00000431837	Pos
hsa-miR-449a	IRAK4:ENST00000431837	Neg
hsa-miR-4659a-3p	IRAK4:ENST00000431837	Neg
hsa-miR-543_R+1	IRAK4:ENST00000431837	Neg
hsa-miR-545-3p	IRAK4:ENST00000431837	Pos
hsa-miR-5695_L-1R+1	IRAK4:ENST00000431837	Pos
hsa-miR-619-5p_1ss1GA	IRAK4:ENST00000431837	Pos
hsa-miR-627-5p_1ss2TG	IRAK4:ENST00000431837	Neg
hsa-miR-643_L+2R-3	IRAK4:ENST00000431837	Pos
hsa-miR-758-5p_L-1R+1	IRAK4:ENST00000431837	Neg
hsa-miR-874-5p	IRAK4:ENST00000431837	Pos
hsa-miR-876-3p_R-2	IRAK4:ENST00000431837	Pos
hsa-miR-939-5p_R+1	IRAK4:ENST00000431837	Neg
hsa-miR-9985_R-1_1ss16CT	IRAK4:ENST00000431837	Pos
hsa-mir-3202-1-p5	IRAK4:ENST00000431837	Neg
hsa-mir-3202-2-p5	IRAK4:ENST00000431837	Neg
mdo-miR-106-5p_R+2_1ss1AT	IRAK4:ENST00000431837	Neg
mmu-miR-146a-5p_R+1	IRAK4:ENST00000431837	Pos
mmu-miR-146a-5p_R+1_1ss22TA	IRAK4:ENST00000431837	Pos
ocu-miR-146b-5p_R-1_1ss23GA	IRAK4:ENST00000431837	Pos
ssc-mir-1285-p5_1ss18TC	IRAK4:ENST00000431837	Neg

## Sheet: 点
RNA	Regulation	Type
circRNA7429	circRNAup	circRNA
circRNA13950	circRNAup	circRNA
circRNA2692	circRNAup	circRNA
circRNA3453	circRNAup	circRNA
circRNA11459	circRNAup	circRNA
circRNA11934	circRNAdown	circRNA
circRNA2013	circRNAup	circRNA
circRNA10508	circRNAup	circRNA
circRNA8162	circRNAdown	circRNA
circRNA3680	circRNAdown	circRNA
circRNA2333	circRNAdown	circRNA
circRNA3016	circRNAdown	circRNA
circRNA7309	circRNAup	circRNA
circRNA2092	circRNAup	circRNA
circRNA11886	circRNAup	circRNA
circRNA447	circRNAup	circRNA
circRNA450	circRNAup	circRNA
circRNA702	circRNAdown	circRNA
circRNA1067	circRNAup	circRNA
circRNA3069	circRNAdown	circRNA
circRNA8846	circRNAup	circRNA
circRNA1747	circRNAup	circRNA
circRNA12827	circRNAup	circRNA
circRNA13186	circRNAup	circRNA
circRNA5896	circRNAup	circRNA
circRNA811	circRNAup	circRNA
circRNA12891	circRNAdown	circRNA
circRNA13107	circRNAdown	circRNA
circRNA12435	circRNAup	circRNA
circRNA13521	circRNAup	circRNA
circRNA13074	circRNAdown	circRNA
PC-3p-18565_22	miRNAup	miRNA
PC-5p-25681_13	miRNAup	miRNA
bta-miR-150	miRNAdown	miRNA
bta-miR-2424_L-3	miRNAdown	miRNA
hsa-miR-1255a	miRNAup	miRNA
hsa-miR-127-5p_R+1	miRNAup	miRNA
hsa-miR-148b-3p	miRNAdown	miRNA
hsa-miR-186-3p_R-4	miRNAdown	miRNA
hsa-miR-29b-1-5p	miRNAup	miRNA
hsa-miR-29b-2-5p_R+1	miRNAup	miRNA
hsa-miR-301b-3p	miRNAdown	miRNA
hsa-miR-3140-3p_R-1	miRNAdown	miRNA
hsa-miR-382-5p	miRNAup	miRNA
hsa-miR-432-5p_1ss23GT	miRNAup	miRNA
hsa-miR-433-3p	miRNAup	miRNA
hsa-miR-4446-5p_R+1	miRNAdown	miRNA
hsa-miR-4659a-3p	miRNAup	miRNA
hsa-miR-4659b-3p_L+1R-1	miRNAup	miRNA
hsa-miR-4676-3p_R-1	miRNAup	miRNA
hsa-miR-497-5p	miRNAup	miRNA
hsa-miR-548ab	miRNAup	miRNA
hsa-miR-548ag_1ss4GA	miRNAup	miRNA
hsa-miR-548aq-5p	miRNAdown	miRNA
hsa-miR-548au-5p_R+1	miRNAdown	miRNA
hsa-miR-619-5p_1ss1GA	miRNAdown	miRNA
hsa-miR-629-3p	miRNAup	miRNA
hsa-miR-6513-3p_R+1	miRNAdown	miRNA
hsa-miR-660-3p_R+1	miRNAup	miRNA
hsa-miR-6818-5p	miRNAdown	miRNA
hsa-miR-758-3p	miRNAup	miRNA
hsa-miR-943_L+1R+1	miRNAup	miRNA
mmu-miR-101c_L+1R+2	miRNAup	miRNA
mmu-mir-6240-p5_2ss1GN23GT	miRNAup	miRNA
ppy-miR-1976_L+1R+1	miRNAup	miRNA
efu-mir-9298-p3_1ss18CT	miRNAdown	miRNA
efu-mir-9298-p5_1ss18CT	miRNAdown	miRNA
hsa-miR-103a-1-5p	miRNAup	miRNA
hsa-miR-103a-2-5p_R+1	miRNAdown	miRNA
hsa-miR-214-3p	miRNAup	miRNA
hsa-let-7e-5p	miRNAup	miRNA
hsa-miR-1249-5p	miRNAup	miRNA
hsa-miR-125a-5p	miRNAup	miRNA
hsa-miR-125b-2-3p_L-2R+1	miRNAdown	miRNA
hsa-miR-125b-5p	miRNAdown	miRNA
hsa-miR-3187-3p_R+1	miRNAup	miRNA
hsa-miR-4662b	miRNAdown	miRNA
hsa-miR-6515-5p	miRNAup	miRNA
mmu-let-7c-5p_R+2	miRNAup	miRNA
mmu-miR-351-5p_R-2	miRNAup	miRNA
sha-miR-125a_R+2	miRNAdown	miRNA
PC-3p-9143_61	miRNAdown	miRNA
PC-5p-38995_6	miRNAup	miRNA
bta-miR-2285bm_1ss14GA	miRNAdown	miRNA
cgr-miR-1260_R+2_1	miRNAup	miRNA
cgr-miR-1260_R+2_2	miRNAup	miRNA
cgr-miR-1260_R+2_3	miRNAup	miRNA
cgr-miR-1260_R+2_4	miRNAup	miRNA
cgr-miR-1260_R+2_5	miRNAup	miRNA
cgr-miR-1260_R+2_6	miRNAup	miRNA
hsa-miR-103a-3p	miRNAup	miRNA
hsa-miR-1270	miRNAup	miRNA
hsa-miR-1343-3p	miRNAup	miRNA
hsa-miR-146a-3p_L+1R-2	miRNAdown	miRNA
hsa-miR-188-3p	miRNAdown	miRNA
hsa-miR-18a-3p_1ss23GA	miRNAup	miRNA
hsa-miR-193a-3p	miRNAdown	miRNA
hsa-miR-193b-3p	miRNAdown	miRNA
hsa-miR-211-5p	miRNAdown	miRNA
hsa-miR-3605-3p	miRNAup	miRNA
hsa-miR-363-3p_R+1	miRNAdown	miRNA
hsa-miR-3677-3p	miRNAdown	miRNA
hsa-miR-4433b-3p_L+1_1ss9GC	miRNAup	miRNA
hsa-miR-4738-3p_L-1	miRNAdown	miRNA
hsa-miR-4804-5p_L+1R-1_1ss7CG	miRNAup	miRNA
hsa-miR-491-5p	miRNAup	miRNA
hsa-miR-493-5p	miRNAup	miRNA
hsa-miR-5193	miRNAup	miRNA
hsa-miR-939-5p_R+1	miRNAup	miRNA
hsa-mir-3166-p5	miRNAup	miRNA
hsa-mir-7851-p5_1ss12TG	miRNAup	miRNA
mdo-miR-106-5p_R+2_1ss1AT	miRNAup	miRNA
mmu-miR-497b_L-1	miRNAup	miRNA
mmu-mir-7650-p5_1ss16CT	miRNAdown	miRNA
ptr-mir-4667-p3_1ss22GT	miRNAup	miRNA
PC-3p-32105_9	miRNAup	miRNA
PC-5p-46446_5	miRNAdown	miRNA
hsa-miR-26b-3p_R+1	miRNAdown	miRNA
hsa-miR-409-3p	miRNAup	miRNA
hsa-miR-874-3p	miRNAdown	miRNA
PC-3p-37309_7	miRNAup	miRNA
hsa-miR-2110_R+1	miRNAup	miRNA
hsa-miR-377-3p	miRNAup	miRNA
hsa-miR-5006-3p_R+1	miRNAdown	miRNA
hsa-miR-7851-3p	miRNAdown	miRNA
cja-miR-9933_L-5_1ss12AT	miRNAdown	miRNA
hsa-miR-181c-5p_R+1	miRNAdown	miRNA
hsa-miR-30c-2-3p	miRNAup	miRNA
hsa-miR-3173-5p	miRNAup	miRNA
hsa-miR-6501-5p_R+1	miRNAup	miRNA
hsa-miR-6799-3p_R-1	miRNAup	miRNA
hsa-miR-6859-5p	miRNAup	miRNA
hsa-miR-874-5p	miRNAdown	miRNA
hsa-mir-3202-1-p5	miRNAup	miRNA
hsa-mir-3202-2-p5	miRNAup	miRNA
mdo-miR-181b-5p_R+3	miRNAup	miRNA
mdo-miR-22-3p_R+1	miRNAup	miRNA
mmu-miR-3084-3p_R+4_1ss2TG	miRNAup	miRNA
mmu-mir-6240-p5_1ss22GT	miRNAup	miRNA
hsa-miR-146a-5p	miRNAdown	miRNA
hsa-miR-146b-5p_R-1	miRNAdown	miRNA
hsa-miR-27a-3p	miRNAdown	miRNA
hsa-miR-27b-3p	miRNAdown	miRNA
hsa-miR-3130-3p	miRNAup	miRNA
hsa-miR-9985_R-1_1ss16CT	miRNAdown	miRNA
mmu-miR-146a-5p_R+1	miRNAdown	miRNA
mmu-miR-146a-5p_R+1_1ss22TA	miRNAdown	miRNA
ocu-miR-146b-5p_R-1_1ss23GA	miRNAdown	miRNA
PC-3p-31135_9	miRNAup	miRNA
bta-miR-199c_L-1R+3	miRNAup	miRNA
hsa-miR-129-5p	miRNAdown	miRNA
hsa-miR-1537-5p	miRNAup	miRNA
hsa-miR-2276-3p	miRNAdown	miRNA
hsa-miR-30d-3p	miRNAdown	miRNA
hsa-miR-424-3p	miRNAup	miRNA
hsa-miR-4766-3p	miRNAup	miRNA
hsa-miR-6837-3p	miRNAdown	miRNA
hsa-mir-4781-p3	miRNAdown	miRNA
hsa-mir-7852-p5	miRNAup	miRNA
ssc-miR-451_L+4R-2	miRNAup	miRNA
hsa-miR-548ay-3p	miRNAup	miRNA
hsa-mir-548aw-p3_1ss1TC	miRNAup	miRNA
bta-mir-677-p3	miRNAup	miRNA
hsa-miR-1306-5p_R-1	miRNAup	miRNA
hsa-miR-203a-3p_R+1	miRNAup	miRNA
hsa-miR-4799-5p	miRNAup	miRNA
hsa-miR-6886-3p_R+2	miRNAdown	miRNA
hsa-miR-93-3p_R+1	miRNAup	miRNA
cgr-miR-532-5p_R+2_1	miRNAdown	miRNA
cgr-miR-532-5p_R+2_2	miRNAdown	miRNA
hsa-miR-4676-5p_R+1	miRNAup	miRNA
hsa-miR-6741-3p	miRNAup	miRNA
PC-3p-15244_29	miRNAup	miRNA
PC-3p-38005_6	miRNAup	miRNA
PC-5p-19713_20	miRNAdown	miRNA
PC-5p-31749_9	miRNAup	miRNA
cgr-miR-1285_L-4R-1_1ss15GA	miRNAup	miRNA
hsa-miR-188-5p	miRNAup	miRNA
hsa-miR-19b-1-5p	miRNAup	miRNA
hsa-miR-221-5p	miRNAdown	miRNA
hsa-miR-335-3p	miRNAdown	miRNA
hsa-miR-380-5p_L+1R-1	miRNAup	miRNA
hsa-miR-382-3p_R+1	miRNAup	miRNA
hsa-miR-4433a-5p_R+2	miRNAdown	miRNA
hsa-miR-449a	miRNAup	miRNA
hsa-miR-543_R+1	miRNAup	miRNA
hsa-miR-545-3p	miRNAdown	miRNA
hsa-miR-5695_L-1R+1	miRNAdown	miRNA
hsa-miR-627-5p_1ss2TG	miRNAup	miRNA
hsa-miR-643_L+2R-3	miRNAdown	miRNA
hsa-miR-758-5p_L-1R+1	miRNAup	miRNA
hsa-miR-876-3p_R-2	miRNAdown	miRNA
ssc-mir-1285-p5_1ss18TC	miRNAup	miRNA
TLR7:ENST00000380659	mRNAup	mRNA
C1QA:ENST00000374642	mRNAup	mRNA
C2:ENST00000299367	mRNAup	mRNA
IFNAR2:ENST00000404220	mRNAup	mRNA
STAT2:ENST00000557235	mRNAup	mRNA
IFNAR2:ENST00000342136	mRNAdown	mRNA
IRF5:ENST00000473745	mRNAdown	mRNA
IRF5:ENST00000402030	mRNAup	mRNA
IRAK4:ENST00000550615	mRNAdown	mRNA
TYK2:ENST00000529370	mRNAdown	mRNA
STAT1:ENST00000415035	mRNAup	mRNA
NFKB1:ENST00000505458	mRNAdown	mRNA
IRAK4:ENST00000431837	mRNAdown	mRNA
